# Supplementary material for: Long Non-Coding RNA Expression in Alpha-1 Antitrypsin Deficient Monocytes Pre- and Post-AAT Augmentation Therapy
Source: Noncoding RNA. 2023 Jan 10;9(1):6. doi: 10.3390/ncrna9010006 (PMC9844503; doi:10.3390/ncrna9010006)
Supplement: Supplementary file 1 [file ncrna-09-00006-s001.zip]

Archive with 4 entries (3 files):
- ncrna-1983663-supplementary/
- ncrna-1983663-supplementary/ncrna-1983663-Figure S1.pdf
- ncrna-1983663-supplementary/ncrna-1983663-supplementary-Dataset S1.xls
- ncrna-1983663-supplementary/ncrna-1983663-Table S1-S2.xlsx
