# Supplementary material for: Long Non-Coding RNA Expression in Alpha-1 Antitrypsin Deficient Monocytes Pre- and Post-AAT Augmentation Therapy
Source: Noncoding RNA. 2023 Jan 10;9(1):6. doi: 10.3390/ncrna9010006 (PMC9844503; doi:10.3390/ncrna9010006)
Supplement: Supplementary file 1 [file ncrna-09-00006-s001.zip › ncrna-1983663-supplementary/ncrna-1983663-supplementary-Dataset S1.xls]

## Sheet:  up_ZZ_Day2_vs_ZZ_Day0
# Fold Change cut-off: 2.0 # Condition pairs: ZZ_Day2_vs_ZZ_Day0 # Column A: ProbeName it represents probe name. # Column B: Fold change, positive value indicates up-regulation and negative value indicates down-regulation. # Column C: FC (abs), Absolute Fold change between two samples. # Column D: Log Fold change, log2 value of absolute fold change. Positive value indicates up-regulation and nega…
ZZ_Day2_vs_ZZ_Day0 2.0 fold up regulated LncRNAs
	Fold change and Regulation				Annotations																			Raw Intensity		Normalized Intensity
ProbeName	Fold Change	FC (abs)	Log Fold change	Regulation	type	seqname	GeneSymbol	source	RNAlength	chrom	strand	txStart	txEnd	Xhyb	Sequence	EntrezID	relationship	Associated_gene_acc	Associated_gene_name	Associated_protein_name	Associated_gene_strand	Associated_gene_start	Associated_gene_end	[ZZ_Day2](raw)	[ZZ_Day0](raw)	[ZZ_Day2](normalized)	[ZZ_Day0](normalized)
ASHGA5P057058	2.77281	2.77281	1.47135	up	noncoding	TCONS_00012359	XLOC_005919	LincRNAs identified by Cabili et al	747	chr6	-	166471806	166473129		AACAGACCCTGCCACAGTTCTGGGAGTGCATGTTTGAAATGAAAATGGAAATTAGCCCAG		intergenic							42.6695	17.9349	5.07017	3.59882
ASHGA5P053113	2.03233	2.03233	1.02314	up	noncoding	uc011kep.2	PMS2L2	UCSC_knowngene	522	chr7	+	72509965	72519759	NR_003613, NR_023383, NR_027775, NR_027776, NR_028058, NR_046297, uc003txh.4, uc003txn.4, uc003uca.4, uc003uui.2, uc010lbw.2, uc010lgv.1, uc011kfp.2, uc011kfq.2	TTCTTCTAGATGATCTGCACAAATGGTTCCTCTCCTCCTTCCTGATGTCTGCCATTAGCA	5380	intergenic							14335.2	3144.26	12.6903	11.6672
ASHGA5P023084	216.869	216.869	7.76068	up	noncoding	ENST00000569328	RP11-700H13.1	GENCODE	445	chr16	-	58881711	58914117	ENST00000562304	CTGCACACATCCTGGAAGAACCAGAATCCTAGGAGCATGGAAGACTTAATTCATTCAACA		intergenic							26659	87.8917	13.7823	6.02159
ASHGA5P051727	5.25118	5.25118	2.39264	up	noncoding	ENST00000490497	RP11-451G4.1	GENCODE	423	chr3	+	154958736	154960933		GCGCCACCAGAATGACAATAAAAATTTATCATGCTAGAAAGTAATGCCGTGGTATCCAAA		intergenic							56.2314	11.9992	5.42048	3.02784
ASHGA5P028311	227.523	227.523	7.82987	up	noncoding	ENST00000540161	RP11-227B21.2	GENCODE	562	chr12	+	117890816	117894791		TCAACTCACTCTGCAACAGTCGACACAAACAAACATGGAGAAAAGAATATGGACCATCGG		natural antisense	NM_173598	KSR2	kinase suppressor of Ras 2	-	117890816	118406028	2881.37	6.11927	10.2101	2.38021
ASHGA5P030354	3.90005	3.90005	1.96349	up	noncoding	ENST00000568541	RP11-580I1.1	GENCODE	556	chr15	+	24451930	24471001		GCGAAAGTTAATATTATCCAGCCAGCCCAGAGTCCTTTCAACCATCCTGTATGACAACTA		intergenic							4563.49	537.473	10.895	8.93147
ASHGA5P042800	2.10565	2.10565	1.07427	up	noncoding	uc021zos.1	X07060	UCSC_knowngene	388	chr6_mann_hap4	+	1205660	1206048	NM_001242758, NR_024240, uc003noi.3	CCTCAACTTCATGGTGCACTGAGCTGTAACTTCTTCCTTCCCTATTAAAATTAGAACCTG		exon sense-overlapping	NM_001242758	HLA-A	HLA class I histocompatibility antigen, A-1 alpha chain precursor	+	1202631	1206062	11583.3	2375.02	12.3095	11.2352
ASHGA5P042800	2.10565	2.10565	1.07427	up	noncoding	uc021zos.1	X07060	UCSC_knowngene	388	chr6_mann_hap4	+	1205660	1206048	NM_001242758, NR_024240, uc003noi.3	CCTCAACTTCATGGTGCACTGAGCTGTAACTTCTTCCTTCCCTATTAAAATTAGAACCTG		exon sense-overlapping	NM_002116	HLA-A	HLA class I histocompatibility antigen, A-1 alpha chain precursor	+	1202631	1206062	11583.3	2375.02	12.3095	11.2352
ASHGA5P041157	7.93916	7.93916	2.98899	up	noncoding	TCONS_00020237	XLOC_009900	LincRNAs identified by Cabili et al	2055	chr12	+	117147982	117150681		GAATGACTAGTTTTCTAAACAGAACCTGTAATGACAGGCTCACATTTCTTCCTCAACTCC		intergenic							51.5447	5	5.31024	2.32125
ASHGA5P031566	190.873	190.873	7.57647	up	noncoding	ENST00000547549	MIR3179-2	GENCODE	677	chr16	+	16394006	16394683	ENST00000546674	AGATGCCACCCATCTACATATTCTTTCAGATGCACAATATTTCACTGTGTGAATGAAACA	100422886	intergenic							60615.6	262.791	15.3557	7.77922
ASHGA5P029568	1009.93	1009.93	9.98004	up	noncoding	uc021rtn.1	OTX2OS1	UCSC_knowngene	1386	chr14	+	57278723	57387335		ATTTGAATAATATCCATATCCTCCAATCATGTAAGATAATATAATTTATTTTCTTTGCTC	100309464	intergenic							11703.1	5.42204	12.3253	2.34531
ASHGA5P057118	4.41999	4.41999	2.14404	up	noncoding	TCONS_00013474	XLOC_006122	LincRNAs identified by Cabili et al	829	chr7	+	63498205	63500337		ATAAGCCATTTTGGGAGCCACATCCACCACTTTTGTGACTCCCACACAGTTTTAATGGCT		intergenic							102.997	23.847	6.15721	4.01317
ASHGA5P048705	7.67477	7.67477	2.94012	up	noncoding	TCONS_00023825	XLOC_011603	LincRNAs identified by Cabili et al	2392	chr15	-	98538124	98561008		TGTCTCTCAGCAACAACAGCAGCAATTACTTTTGACCACTCACTATCGGAAAACACTGCT		intergenic							49.5062	5	5.26138	2.32125
ASHGA5P022746	2.07837	2.07837	1.05545	up	noncoding	ENST00000561980	RP11-830F9.7	GENCODE	531	chr16	-	89003186	89004164		CCCGACGCGGGCCGGGACCTTCCTTTCAGCGGAGCCCAGGCCGTGCTGCGGGAAACAGCC		intron sense-overlapping	NM_005187	CBFA2T3	protein CBFA2T3 isoform 1	-	88941262	89043504	12.0404	5	3.37671	2.32125
ASHGA5P022746	2.07837	2.07837	1.05545	up	noncoding	ENST00000561980	RP11-830F9.7	GENCODE	531	chr16	-	89003186	89004164		CCCGACGCGGGCCGGGACCTTCCTTTCAGCGGAGCCCAGGCCGTGCTGCGGGAAACAGCC		intron sense-overlapping	NM_175931	CBFA2T3	protein CBFA2T3 isoform 2	-	88941262	89007608	12.0404	5	3.37671	2.32125
ASHGA5P030312	2.10953	2.10953	1.07692	up	noncoding	ENST00000566974	RP11-6O2.4	GENCODE	2562	chr15	-	99669036	99672011		CCTCCACTATTTAATATACTCTTCTGTTTCACTGATTTCCATATTGGGCCAACAAGTATT		natural antisense	NM_015286	SYNM	synemin isoform B	+	99645285	99675800	14.5317	8.4016	3.62855	2.55163
ASHGA5P030312	2.10953	2.10953	1.07692	up	noncoding	ENST00000566974	RP11-6O2.4	GENCODE	2562	chr15	-	99669036	99672011		CCTCCACTATTTAATATACTCTTCTGTTTCACTGATTTCCATATTGGGCCAACAAGTATT		natural antisense	NM_145728	SYNM	synemin isoform A	+	99645285	99675800	14.5317	8.4016	3.62855	2.55163
ASHGA5P052532	3.06072	3.06072	1.61387	up	noncoding	ENST00000504756	RP11-423H2.1	GENCODE	489	chr5	+	177309391	177310001		CTTTAGACAAGTATGTTTCTGTTTTGACTGTCACTGCCAGGTGGTGAGGAAGCAAAGAGT		intergenic							18.0574	5	3.93512	2.32125
ASHGA5P051224	4.38167	4.38167	2.13148	up	noncoding	ENST00000436681	LINC00281	GENCODE	3714	chr22	-	21655279	21664170		GTAAAGTGGATAAAAAACTCACACTTGCACTCATGGAAGGCTTTTCATGAATTTGTCAAT	26080	intergenic							26.7064	5	4.45273	2.32125
ASHGA5P028608	2.72948	2.72948	1.44862	up	noncoding	ENST00000435281	LINC00439	GENCODE	902	chr13	-	78513296	78519009	NR_047024	ATCTTAGCTTCTGGGATTGGCTCCTACTCAACATGCAAGCACTAATCCTCTAACATGCAG	100874171	intron sense-overlapping	NM_000115	EDNRB	endothelin B receptor isoform 1 precursor	-	78469615	78549664	38.4087	16.6556	4.93741	3.48879
ASHGA5P030486	4.90169	4.90169	2.29328	up	noncoding	uc001zol.3	BC045779	UCSC_knowngene	1610	chr15	+	42100588	42102743		TTCCTATTCGCAGTCTCCAGGCTTGCTCTTGTCTGCTATTTCCAGTGCTAATGAAGAGTT		intron sense-overlapping	NM_001128608	MAPKBP1	mitogen-activated protein kinase-binding protein 1 isoform b	+	42066631	42120053	31.0825	5.95734	4.66576	2.37248
ASHGA5P030486	4.90169	4.90169	2.29328	up	noncoding	uc001zol.3	BC045779	UCSC_knowngene	1610	chr15	+	42100588	42102743		TTCCTATTCGCAGTCTCCAGGCTTGCTCTTGTCTGCTATTTCCAGTGCTAATGAAGAGTT		intron sense-overlapping	NM_001265611	MAPKBP1	mitogen-activated protein kinase-binding protein 1 isoform c	+	42066631	42120053	31.0825	5.95734	4.66576	2.37248
ASHGA5P030486	4.90169	4.90169	2.29328	up	noncoding	uc001zol.3	BC045779	UCSC_knowngene	1610	chr15	+	42100588	42102743		TTCCTATTCGCAGTCTCCAGGCTTGCTCTTGTCTGCTATTTCCAGTGCTAATGAAGAGTT		intron sense-overlapping	NM_014994	MAPKBP1	mitogen-activated protein kinase-binding protein 1 isoform a	+	42066631	42120053	31.0825	5.95734	4.66576	2.37248
ASHGA5P047179	2.16092	2.16092	1.11164	up	noncoding	TCONS_00014912	XLOC_006978	LincRNAs identified by Cabili et al	388	chr8	-	2387146	2415857		ATGTCACTGGTTTTCTGCTGCCCCTTTTGGCTCCATTCCACGTGCGTCCATACAAACCGG		intergenic							5824.13	1150.77	11.2472	10.1356
ASHGA5P018265	2.89871	2.89871	1.53541	up	noncoding	ENST00000451392	LINC00607	GENCODE	581	chr2	-	216506490	216696313		GAAAAAGAAGGTCTGCCCATCCACATCATTTTGGCTGAATGCGTGACCTATCCAATCCTT	646324	intergenic							10760.4	1598.08	12.1881	10.6527
ASHGA5P023814	2.31345	2.31345	1.21004	up	noncoding	HMlincRNA52+	HMlincRNA52	LincRNAs identified by Khalil et al	12759	chr2	+	225061758	225074517		CACCAGAGACTGGGCGTAGAAAGATGGAAGAGACATAAGATTTCCTTTGGCTACATTTGG		intergenic							21.087	11.2397	4.14378	2.93373
ASHGA5P031147	7.60653	7.60653	2.92724	up	noncoding	TCONS_00006102	XLOC_002713	LincRNAs identified by Cabili et al	517	chr3	+	78101913	78114598		GTAGGATGTCTGCCTCTAACCTGTGGAATATTCCACCTTCTTCTTTTCATCTGCCCCAAA		intergenic							778.072	69.0062	8.57489	5.64765
ASHGA5P058220	34.4166	34.4166	5.10503	up	noncoding	TCONS_00028268	XLOC_013612	LincRNAs identified by Cabili et al	1268	chr20	+	62033152	62034595		CCCTCCACCAGGTCCACAAGCCCTGTGAACCATCCCTCTCACACCACGTCTGCCGGGCAC		intergenic							38509.3	693.775	14.4478	9.34275
ASHGA5P034386	7.77112	7.77112	2.95812	up	noncoding	TCONS_00015901	XLOC_007262	LincRNAs identified by Cabili et al	2155	chr9	+	1045425	1048732		AAGTAAGTTGGGAAATCCTATGTCCGCAATCCCATCTGGGATTATTTATTTCGCCGCGTC		intergenic							50.2587	5	5.27937	2.32125
ASHGA5P015411	2.51556	2.51556	1.33088	up	noncoding	NR_024420	LOC389634	RefSeq	682	chr12	-	8509559	8543348		CGGCAGAGGAATAACTTCACTCTTCTCTGCAACGAATCCCAAAAGTATATAATTGAGCTG	389634	intergenic							25.9253	12.4285	4.40863	3.07775
ASHGA5P040648	4.01911	4.01911	2.00688	up	noncoding	ENST00000502275	RP11-395P13.3	GENCODE	760	chr5	-	124705857	124706617		ATGTTTCACTCTTTGCTGGAGTTTACTTTAAAAGCCTCCCTTTCCCTTCAACATTATCAA		intergenic							1177.74	165.716	9.05491	7.04803
ASHGA5P021145	4.31477	4.31477	2.10928	up	noncoding	ENST00000526327	RP11-405K6.1	GENCODE	463	chr11	+	25756316	25803213		TCCATGGTGATTCTTGGCGCCATTGTCAAAGGCCAGCTGACTGTATATGTATATGTCACC		intergenic							32.0777	8.77577	4.70628	2.597
ASHGA5P000022	4.87106	4.87106	2.28424	up	noncoding	AI808306		LincRNAs identified by Khalil et al	451	chr2	+	238206329	238206871		TATCATCTACCCACCTGGTTTTCGGAGGAAAAACTTTGTTCCTTCAGCCATCTTCACAGG		intergenic							2391.51	246.996	9.96846	7.68422
ASHGA5P058652	5.79315	5.79315	2.53435	up	noncoding	uc022alr.1	LOC646329	UCSC_knowngene	271	chr7	-	130557250	130596911		TATCTGTTAACAGACTGCTTTTACACCTACCTACCATACTGGGAACTGCCCAATGGAGAG	646329	intergenic							86.7798	15.8651	5.95242	3.41807
ASHGA5P058034	5.81066	5.81066	2.5387	up	noncoding	TCONS_00025566	XLOC_012393	LincRNAs identified by Cabili et al	3567	chr17	-	13679959	13685245		AATCTTCCTAGAAGTCATCCTCTCAGCTCTTAATCTGGGTGTCTGGTTACCAGTTCAGAA		intergenic							133.05	22.2817	6.4571	3.9184
ASHGA5P043683	80.9095	80.9095	6.33824	up	noncoding	NR_026929	DKFZp434L192	RefSeq	1068	chr7	+	56563915	56564977	ENST00000566570	ACCACATCACCAGGCTCAGTTCCAGGAAGGCTGAGAAGTGCCCAGTACACTGAGGATGCA	222029	intergenic							11155	81.3351	12.2412	5.90298
ASHGA5P040906	2.18411	2.18411	1.12705	up	noncoding	ENST00000505248	RP11-423H2.5	GENCODE	547	chr5	-	177284945	177298191	ENST00000502354, ENST00000511796	TAAAAGAAAACAGACTTGTCACCTCTGGCAAAGCCTCAACATATGGGTATGTATCCGTCA		intergenic							28.556	15.916	4.55022	3.42317
ASHGA5P036078	23.0974	23.0974	4.52966	up	noncoding	TCONS_00017652	XLOC_008328	LincRNAs identified by Cabili et al	1519	chrY	-	22681833	22686319		TCTGGAAATAACTCAGATGGACTCACAGAGCAGACCCAGATACAAAGCAGACATCTGTAG		intergenic							1985.93	52.2866	9.7404	5.21074
ASHGA5P038043	34.8006	34.8006	5.12104	up	noncoding	ENST00000439621	RP11-334A14.8	GENCODE	1871	chr1	+	53580247	53584281		TGTAAACAAGAGCAGATAATCCCCAGCCACGCTCCTCTTATCATTAGATTCCATGCAGCA		natural antisense	NM_006671	SLC1A7	excitatory amino acid transporter 5	-	53552854	53608289	2563.94	43.6734	10.0589	4.93787
ASHGA5P056270	3169.52	3169.52	11.6301	up	noncoding	TCONS_00001566	XLOC_000905	LincRNAs identified by Cabili et al	284	chr1	-	88994517	88995833		CCCTGGAAAGGTGAAACTGAAATCACTCATTCATTCAAAAAGTGTTTACTGAGTAGCTTC		intergenic							28936	5	13.9513	2.32125
ASHGA5P019926	2.09706	2.09706	1.06837	up	noncoding	ENST00000505371	RP11-141O11.2	GENCODE	526	chr5	-	68266518	68325754	uc003jvf.1	TTCATATATATCACAGTCTTTGCTACAGCAGTGTGTTCCTCTCAAGTCACCCACTCGTTC		intergenic							12.1865	5	3.38962	2.32125
ASHGA5P044460	2.71327	2.71327	1.44003	up	noncoding	ENST00000577199	RP11-1C8.6	GENCODE	777	chr8	-	104395305	104396082		TGTCTGATATTCTCTACCAAATGGTAAGGAATTTGAGGATAGAATCCATCCTTTGTTACC		intergenic							729.331	166.387	8.4957	7.05567
ASHGA5P032250	7.53634	7.53634	2.91386	up	noncoding	ENST00000583141	RP11-160E2.19	GENCODE	757	chr17	-	18994381	18995138		AGAAAGTGCGTTTCCTAAAACCAAATCCTGCCCTTGCTCCAAAACTGTCAGTGGTGGTTT		intergenic							894.554	77.4602	8.73782	5.82396
ASHGA5P056262	4.11188	4.11188	2.0398	up	noncoding	TCONS_00001508	XLOC_000852	LincRNAs identified by Cabili et al	236	chr1	-	59760716	59762053		GTAGGCGACTCAGCCGTGTTGAACCATGAAAGGACCTCAGGAATGAAACCCACACACAGC		intergenic							32.2584	9.32902	4.71403	2.67424
ASHGA5P032476	2.55545	2.55545	1.35357	up	noncoding	TCONS_00029733	XLOC_014405	LincRNAs identified by Cabili et al	515	chr22	-	46530795	46536813		TATTTCTAAGCCAGAAATCTGTGCGTGGCCTAACAGCCCCTCTGCCCTCCACACCAGTGA		intergenic							5528.26	926.514	11.1602	9.80665
ASHGA5P042624	2.19945	2.19945	1.13715	up	noncoding	ENST00000422700	RP3-523C21.1	GENCODE	1831	chr6	+	132453054	132458073		CTGGAAACACTGAGATCTTCCTCTGTTGCTATTTAGCTAACTGTTCAATTTAACTCTTAA		intergenic							15.1321	8.31103	3.68273	2.54559
ASHGA5P041505	4.38439	4.38439	2.13238	up	noncoding	ENST00000523301	RP11-175K6.1	GENCODE	568	chr5	+	158527629	158534225		ATTATTTCCCTTTCTCTCTCTTCAATGTTCCCTTATCCTGAGTATTGAGGTCCCCAAACG		bidirectional	NM_024007	EBF1	transcription factor COE1	-	158122922	158526788	10375.4	1048.3	12.1254	9.99306
ASHGA5P048466	45.8077	45.8077	5.51752	up	noncoding	TCONS_00013748	XLOC_006388	LincRNAs identified by Cabili et al	237	chr7	-	26584207	26590534		AGGAAGCAGACCTGATTCGTTTCTAGGCTTCATCACCAGCTGCTTCTCCCTCGGCCTCCT		intergenic							6363.7	78.6354	11.3664	5.84886
ASHGA5P035228	2.80652	2.80652	1.48878	up	noncoding	ENST00000414416	LINC00116	GENCODE	2051	chr2	-	110969105	111002997		TAGAAGGATGCCTTCCTCCAAGACCTGTTTGGAGAATTAAACCAGCTAATGTAGGAGCCA	205251	intergenic							27.9138	11.9973	4.51635	3.02757
ASHGA5P044156	2.35729	2.35729	1.23713	up	noncoding	TCONS_00018499	XLOC_008810	LincRNAs identified by Cabili et al	333	chr10	-	48497448	48499077		GCTATTCCAGTTTGAGTGTCCCAGAAAACTCCTCCATTGTTGACAAACTGAGAAGCTGAC		intergenic							16.8856	8.8136	3.83888	2.60175
ASHGA5P040876	4.00011	4.00011	2.00004	up	noncoding	ENST00000521965	MIR4454	GENCODE	602	chr5	-	170174050	170185183		AGGTTTCAGTAGAGGGTACTATACTAAATAATGCAGCCCTCCTTCTTTCTTCCATGCCAG	100616234	intergenic							5485.06	616.513	11.1516	9.15153
ASHGA5P058624	2.71718	2.71718	1.44211	up	noncoding	uc011csa.2	PMCHL2	UCSC_knowngene	722	chr5	+	70671611	70681820		TTGAGAAATGAAGTGTGAAACTGTCAGGAAGACAGATGAAATGATTTGCCTGAGGCCGTA	5370	intergenic							16.021	5	3.76336	2.32125
ASHGA5P000580	9.03186	9.03186	3.17502	up	noncoding	DA802942		UCR	501	chr13	+	112711042	112742562		GAGGAACTAACTAGCCAGCTTCCGTTCCTCAGCCTTTCTTCTCTAAACACCAAGTTCCAC		intron sense-overlapping	ENST00000330949	SOX1	SRY (sex determining region Y)-box 1 [Source:HGNC Symbol;Acc:11189]	+	112721912	112726020	330.319	30.2018	7.5486	4.37358
ASHGA5P000580	9.03186	9.03186	3.17502	up	noncoding	DA802942		UCR	501	chr13	+	112711042	112742562		GAGGAACTAACTAGCCAGCTTCCGTTCCTCAGCCTTTCTTCTCTAAACACCAAGTTCCAC		intron sense-overlapping	NM_005986	SOX1	transcription factor SOX-1	+	112721912	112726020	330.319	30.2018	7.5486	4.37358
ASHGA5P044937	786.394	786.394	9.61911	up	noncoding	ENST00000517397	KB-1205A7.2	GENCODE	301	chr8	+	99615480	99618568		CTTCATGGTTTAAGATGGGTGGTTGAACATTACCACACACTGACTCCAGAACTCAAAAAA		intronic antisense	NM_001256312	STK3	serine/threonine-protein kinase 3 isoform 2	-	99466858	99954799	9202.75	5	11.9404	2.32125
ASHGA5P044937	786.394	786.394	9.61911	up	noncoding	ENST00000517397	KB-1205A7.2	GENCODE	301	chr8	+	99615480	99618568		CTTCATGGTTTAAGATGGGTGGTTGAACATTACCACACACTGACTCCAGAACTCAAAAAA		intronic antisense	NM_001256313	STK3	serine/threonine-protein kinase 3 isoform 3	-	99466858	99837899	9202.75	5	11.9404	2.32125
ASHGA5P044937	786.394	786.394	9.61911	up	noncoding	ENST00000517397	KB-1205A7.2	GENCODE	301	chr8	+	99615480	99618568		CTTCATGGTTTAAGATGGGTGGTTGAACATTACCACACACTGACTCCAGAACTCAAAAAA		intronic antisense	NM_006281	STK3	serine/threonine-protein kinase 3 isoform 1	-	99466858	99837909	9202.75	5	11.9404	2.32125
ASHGA5P058211	3.57076	3.57076	1.83623	up	noncoding	TCONS_00028204	XLOC_013552	LincRNAs identified by Cabili et al	5151	chr20	+	47099593	47105772	TCONS_00027943, TCONS_00028202, TCONS_00028203, TCONS_00028561	TCCTGTCCAGGTCACCAGCTCCAAGACTCTCAAACTAGAACAGCAGCACTGACTTCTTGC		intergenic							26.1113	8.67201	4.42112	2.58489
ASHGA5P014919	2.65691	2.65691	1.40975	up	noncoding	ENST00000414744	SPAG5-AS1	GENCODE	2141	chr17	+	26925807	26944393		AACCTGTTGAAGAATGGACTTAGAGGAAACCGAAGAAATCCCAAGCCACACCAAACAGGA		intronic antisense	NM_001174103	SGK494	uncharacterized serine/threonine-protein kinase SgK494	-	26934981	26941211	33.3689	15.128	4.75989	3.35014
ASHGA5P014919	2.65691	2.65691	1.40975	up	noncoding	ENST00000414744	SPAG5-AS1	GENCODE	2141	chr17	+	26925807	26944393		AACCTGTTGAAGAATGGACTTAGAGGAAACCGAAGAAATCCCAAGCCACACCAAACAGGA		natural antisense	NM_006461	SPAG5	sperm-associated antigen 5	-	26904582	26926056	33.3689	15.128	4.75989	3.35014
ASHGA5P014919	2.65691	2.65691	1.40975	up	noncoding	ENST00000414744	SPAG5-AS1	GENCODE	2141	chr17	+	26925807	26944393		AACCTGTTGAAGAATGGACTTAGAGGAAACCGAAGAAATCCCAAGCCACACCAAACAGGA		natural antisense	NM_014680	KIAA0100	UPF0378 protein KIAA0100 precursor	-	26941457	26972177	33.3689	15.128	4.75989	3.35014
ASHGA5P032439	3.73063	3.73063	1.89942	up	noncoding	TCONS_00029699	XLOC_014372	LincRNAs identified by Cabili et al	452	chr22	-	38812751	38819028		AAGGGGCCTTAAAGTGCTGCCAAGCCCTCCTCATGCCACACCAGCTTCCCTGCAGAGCCA		intergenic							1658.91	233.654	9.49014	7.59072
ASHGA5P041033	26.236	26.236	4.71348	up	noncoding	ENST00000412838	RP11-316M1.3	GENCODE	368	chr1	+	150945598	150948010		GCCCTGTCTGAAAGAGCCACCCCAACTTTTGTTTTGTAAAATGTATGAGTTTTCAAATGA		intronic antisense	NM_022075	CERS2	ceramide synthase 2	-	150937648	150947479	12692.3	257.717	12.4683	7.7548
ASHGA5P041033	26.236	26.236	4.71348	up	noncoding	ENST00000412838	RP11-316M1.3	GENCODE	368	chr1	+	150945598	150948010		GCCCTGTCTGAAAGAGCCACCCCAACTTTTGTTTTGTAAAATGTATGAGTTTTCAAATGA		intronic antisense	NM_181746	CERS2	ceramide synthase 2	-	150937648	150947479	12692.3	257.717	12.4683	7.7548
ASHGA5P057973	12.0386	12.0386	3.5896	up	noncoding	TCONS_00024495	XLOC_011815	LincRNAs identified by Cabili et al	522	chr16	+	86716080	86730049		GCCTCTTCAGCCTTCTTCAGCTTGCTGCCTTTGCTGGGGAAGTGCCCACTCAGGACAGCT		intergenic							2421.08	110.352	9.98283	6.39324
ASHGA5P029561	4.58393	4.58393	2.19659	up	noncoding	ENST00000569625	RP11-1012E15.1	GENCODE	600	chr14	+	56382444	56383044		TAAATTATGAAAGCTTTCCTCAGTACTCCTGCCCTATGATCCTTCCCTCACTTCATTAAG		intergenic							932.654	124.423	8.78447	6.58788
ASHGA5P019315	5.90256	5.90256	2.56134	up	noncoding	ENST00000478005	TIPARP-AS1	GENCODE	554	chr3	-	156389652	156391722		GAAGTCAGTAAAACTAGGAGCTAAGAGAGTAATAACAGGATGGAGATGGAGTTTCATGAC		intronic antisense	ENST00000486483	TIPARP	TCDD-inducible poly(ADP-ribose) polymerase [Source:HGNC Symbol;Acc:23696]	+	156391023	156422928	36.8153	5	4.88259	2.32125
ASHGA5P043881	4.13109	4.13109	2.04652	up	noncoding	ENST00000453278	RP11-807H17.1	GENCODE	531	chr7	+	125071400	125101665		TGAGCAAAACTGATGCACTTGTCTCCCAGGATTAATCCATACAAGTCACCTCTAAAATTA		intergenic							49.7895	13.7809	5.26733	3.22081
ASHGA5P018824	3.35439	3.35439	1.74605	up	noncoding	ENST00000458003	RP11-168O16.1	GENCODE	3496	chr1	+	200993088	200997920		GGTAAGCATGATGGGGAAACTGAGCCTCACATGTATGAATTCCAGCATATAAGCAACAGA		bidirectional	NM_001252100	KIF21B	kinesin-like protein KIF21B isoform 1	-	200938513	200992828	24.1252	8.54731	4.31532	2.56927
ASHGA5P018824	3.35439	3.35439	1.74605	up	noncoding	ENST00000458003	RP11-168O16.1	GENCODE	3496	chr1	+	200993088	200997920		GGTAAGCATGATGGGGAAACTGAGCCTCACATGTATGAATTCCAGCATATAAGCAACAGA		bidirectional	NM_001252102	KIF21B	kinesin-like protein KIF21B isoform 3	-	200938513	200992828	24.1252	8.54731	4.31532	2.56927
ASHGA5P018824	3.35439	3.35439	1.74605	up	noncoding	ENST00000458003	RP11-168O16.1	GENCODE	3496	chr1	+	200993088	200997920		GGTAAGCATGATGGGGAAACTGAGCCTCACATGTATGAATTCCAGCATATAAGCAACAGA		bidirectional	NM_001252103	KIF21B	kinesin-like protein KIF21B isoform 4	-	200938513	200992828	24.1252	8.54731	4.31532	2.56927
ASHGA5P018824	3.35439	3.35439	1.74605	up	noncoding	ENST00000458003	RP11-168O16.1	GENCODE	3496	chr1	+	200993088	200997920		GGTAAGCATGATGGGGAAACTGAGCCTCACATGTATGAATTCCAGCATATAAGCAACAGA		bidirectional	NM_017596	KIF21B	kinesin-like protein KIF21B isoform 2	-	200938513	200992828	24.1252	8.54731	4.31532	2.56927
ASHGA5P036329	4.37513	4.37513	2.12933	up	noncoding	ENST00000449346	AC013264.2	GENCODE	455	chr2	+	198062714	198063997		GCCTTCACAGTTTAGGTTTTGGTAAGAAGAAAGCTTATCTTCATGTCATGAGAAAGAAAA		intronic antisense	NM_001195144	ANKRD44	serine/threonine-protein phosphatase 6 regulatory ankyrin repeat subunit B isoform A	-	197851385	198175521	31.048	8.16049	4.66468	2.53536
ASHGA5P036329	4.37513	4.37513	2.12933	up	noncoding	ENST00000449346	AC013264.2	GENCODE	455	chr2	+	198062714	198063997		GCCTTCACAGTTTAGGTTTTGGTAAGAAGAAAGCTTATCTTCATGTCATGAGAAAGAAAA		intronic antisense	NM_153697	ANKRD44	serine/threonine-protein phosphatase 6 regulatory ankyrin repeat subunit B isoform B	-	197964194	198175521	31.048	8.16049	4.66468	2.53536
ASHGA5P053325	12.637	12.637	3.65958	up	noncoding	TCONS_00012008	XLOC_005524	LincRNAs identified by Cabili et al	468	chr6	+	159884339	159887734		AAGCATCAGCTTTGGTTCTTATGACGCAGTCACTAACATCACACACGACCAAAACAGCAG		intergenic							131.286	10.0635	6.44187	2.78228
ASHGA5P034015	304.82	304.82	8.25181	up	noncoding	TCONS_00004039	XLOC_001878	LincRNAs identified by Cabili et al	245	chr2	+	222688045	222688435		CATTTCTGAGTCACCATCCAGTGGGAAAAAGATCTCAAAAAGGGACCAAGAATAACAAAG		intergenic							3666.83	5	10.5731	2.32125
ASHGA5P034599	4.30061	4.30061	2.10454	up	noncoding	TCONS_00004770	XLOC_001453	LincRNAs identified by Cabili et al	494	chr2	+	45401106	45402546		TCCTTCACTCGTCTCAGAAAACAACTCACGACTACAGCAGCTTGCATGATGAAATGGAAG		intergenic							26.1839	5	4.42579	2.32125
ASHGA5P040294	2.81115	2.81115	1.49116	up	noncoding	uc021xwe.1	AK126225	UCSC_knowngene	1694	chr5	-	1317869	1319563		GAAAATAAATCGAGGATGCCAAGTCCTCCTCTTAGAAAAATAGCCCCTGCAGTGGGGTTT		exon sense-overlapping	NM_030782	CLPTM1L	cleft lip and palate transmembrane protein 1-like protein	-	1317999	1345002	79.1071	29.7571	5.84214	4.35098
ASHGA5P042156	19.8809	19.8809	4.31331	up	noncoding	ENST00000427974	RP1-56L9.7	GENCODE	741	chr6	-	160060338	160061133		CCTCTTCTTTCCACATTTGAGTATTTGATCAACCTGGTATTTATTTTGGAAGTATGCATC		intergenic							3468.47	96.7919	10.4917	6.17836
ASHGA5P048164	12.7275	12.7275	3.66988	up	noncoding	TCONS_00014043	XLOC_005955	LincRNAs identified by Cabili et al	979	chr7	+	389823	391347	TCONS_00013287, TCONS_00013288, TCONS_00014042	GAGAGCAAGGCCGAAGAAACCCGCACTGGCACACATCAAAACACAACTCCACACAACGTC		intergenic							2658.89	112.506	10.0923	6.42241
ASHGA5P023718	61.6699	61.6699	5.94649	up	noncoding	HMlincRNA1594+	HMlincRNA1594	LincRNAs identified by Khalil et al	4169	chrX	+	39547291	39551460		TTCCAAGGATTCCTTCCATTTCAGATCAAAACCACCACACTGAGTCTTCTCAACATGAGA		intergenic							8111.44	75.9895	11.7392	5.79266
ASHGA5P041654	245.991	245.991	7.94246	up	noncoding	ENST00000444978	RP3-380B8.3	GENCODE	361	chr6	-	5875163	5876103		TGATATAATCCAGAAAAGCAAGAGTCCACCCAAAGTCAGAAGAGAAGAATTCAGAAGAGT		intergenic							4972.4	12.4092	11.0187	3.07619
ASHGA5P031543	8.69134	8.69134	3.11958	up	noncoding	ENST00000565359	RP11-552C15.1	GENCODE	520	chr16	+	12639338	12640541		CCCACCCAAGGATAATACAGGTGGAACATAAATGCCAGATTGATCTATTGATAATTATAA		intron sense-overlapping	NM_032167	SNX29	sorting nexin-29	+	12070601	12668146	58.3445	5.49519	5.46876	2.34918
ASHGA5P019489	2.19579	2.19579	1.13474	up	noncoding	ENST00000487582	TMEM198B	GENCODE	1581	chr12	+	56226630	56230030		TGAAATAGCCTTTTAAATGTTCACCTCAGCTTGCCTCACAGTGGGTCTGTTCCTGGTTTC	440104	natural antisense	NM_002429	MMP19	matrix metalloproteinase-19 isoform rasi-1 preproprotein	-	56229213	56236735	7370.93	1420.21	11.5789	10.4442
ASHGA5P034050	13.0949	13.0949	3.71094	up	noncoding	TCONS_00005041	XLOC_001916	LincRNAs identified by Cabili et al	406	chr2	+	239463184	239468090		TGCTTAAATCCATCCCGCTAAGTGCTGGGGGCTTTATGCGCTATGGGACTCTCAGTCCGG		intergenic							550.331	31.9056	8.16884	4.4579
ASHGA5P029317	1351.26	1351.26	10.4001	up	noncoding	TCONS_00010873	XLOC_004700	LincRNAs identified by Cabili et al	715	chr5	-	1041183	1045593	TCONS_00010232	TCACTCACTAATTTACACCAAGTCACTCCCACTCATTCAGATACAGGCTGGTCCAGCGAC		intergenic							75684.3	57.3477	15.7547	5.35463
ASHGA5P054448	24.8013	24.8013	4.63234	up	noncoding	TCONS_00010726	XLOC_004448	LincRNAs identified by Cabili et al	312	chr5	+	82683935	82687184		TAGATGGAGTCTTGCTCTGTCACCAGGCAATCATTAATGATATTGGTTGTAATTTTAGAG		intergenic							1655.17	41.4836	9.48438	4.85204
ASHGA5P057490	5.68424	5.68424	2.50697	up	noncoding	TCONS_00018319	XLOC_008597	LincRNAs identified by Cabili et al	360	chr10	+	105682667	105683570		ATCTGTACTTCTCTGTGTCAGGATGAATGTCAGGATGAATGTCACCACCACCTGCCTTTT		intergenic							2846.58	246.32	10.1853	7.67833
ASHGA5P015709	2.60555	2.60555	1.38159	up	noncoding	ENST00000422826	H19	GENCODE	1796	chr11	-	2016439	2019027		TTGGCAGACACTGAGTGGGACCTCACTCCTTCCCCATCCACAGAAATGGTGCTACCCAGC	283120	intergenic							1090.29	231.405	8.95799	7.57641
ASHGA5P031698	2.75213	2.75213	1.46055	up	noncoding	ENST00000569756	AC002519.6	GENCODE	551	chr16	+	31814283	31817242		TTTCACTCCACCCAGACCACTGCATCCATTTTTACCTTAAAATATTTGAAATGGACCACT		intergenic							31547.4	6022.41	14.0971	12.6366
ASHGA5P034749	20.017	20.017	4.32315	up	noncoding	ENST00000424487	RP5-1113E3.3	GENCODE	467	chr1	+	10518611	10519395		TGATGACTCATCACCTTTTCCCTGCAAGGAGTGTACTGTAGATTACCAAACCTGCAGAAG		natural antisense	ENST00000377038	DFFA	DNA fragmentation factor, 45kDa, alpha polypeptide [Source:HGNC Symbol;Acc:2772]	-	10516578	10532583	1245.52	39.7941	9.1142	4.79105
ASHGA5P058092	5.41968	5.41968	2.43821	up	noncoding	TCONS_00026493	XLOC_012819	LincRNAs identified by Cabili et al	686	chr18	-	36046479	36052660		AAGCCTGATTCCTCAATTTCCTCTTCTGTCACTCCCAACCTCATACTTTTGTTTGTGAGT		intergenic							6621.51	553.969	11.4193	8.98106
ASHGA5P057133	2.93553	2.93553	1.55362	up	noncoding	TCONS_00013617	XLOC_006281	LincRNAs identified by Cabili et al	504	chr7	+	144084065	144088102	TCONS_00014226	AAATAAAATGTAAAGGCTACAGAATGAAGAAGCAAGCTGGCACCTCACAGCATTGGCCCC		intergenic							2404.11	394.848	9.97261	8.419
ASHGA5P036611	5.63576	5.63576	2.49461	up	noncoding	TCONS_00026423	XLOC_012769	LincRNAs identified by Cabili et al	970	chr18	-	11447607	11489912		AAGTCCATCACTCATCCAGAGAAGACTTTTTAGAGCCACTGTTCTTGGAGCCTGTTACCT		intergenic							30444.1	2853.92	14.0353	11.5407
ASHGA5P032890	2.18605	2.18605	1.12833	up	noncoding	ENST00000583662	RP11-524F11.2	GENCODE	425	chr17	+	17494741	17513799		TAAAATCAATATTGCCGAGGCCTCCGCAGCAGTCAGGCCCTGCCACCGAGCTGTTCGTTA		natural antisense	NM_001267551	PEMT	phosphatidylethanolamine N-methyltransferase isoform 1	-	17408876	17495017	15.0952	8.37804	3.67858	2.55025
ASHGA5P032890	2.18605	2.18605	1.12833	up	noncoding	ENST00000583662	RP11-524F11.2	GENCODE	425	chr17	+	17494741	17513799		TAAAATCAATATTGCCGAGGCCTCCGCAGCAGTCAGGCCCTGCCACCGAGCTGTTCGTTA		natural antisense	NM_001267552	PEMT	phosphatidylethanolamine N-methyltransferase isoform 3	-	17408876	17495017	15.0952	8.37804	3.67858	2.55025
ASHGA5P032890	2.18605	2.18605	1.12833	up	noncoding	ENST00000583662	RP11-524F11.2	GENCODE	425	chr17	+	17494741	17513799		TAAAATCAATATTGCCGAGGCCTCCGCAGCAGTCAGGCCCTGCCACCGAGCTGTTCGTTA		natural antisense	NM_148172	PEMT	phosphatidylethanolamine N-methyltransferase isoform 1	-	17408876	17495017	15.0952	8.37804	3.67858	2.55025
ASHGA5P019208	14.4709	14.4709	3.85509	up	noncoding	ENST00000473164	AC016629.2	GENCODE	944	chr19	+	59086822	59110942		CAGAGACAAGACGGCACCGAAAGCGAAGGAAGCTCCTGCTCCTCCTAAAGCCGAAGCCAA		intergenic							2378.3	92.6873	9.95832	6.10324
ASHGA5P031645	90.501	90.501	6.49986	up	noncoding	TCONS_00006704	XLOC_003318	LincRNAs identified by Cabili et al	363	chr3	-	166641737	166643655		ATATGAAGCAGCAATAGCAACAGAAGAAAAGGCAGTGACATCACCCTCAGCTTGTTGGAG		intergenic							1411.32	10.087	9.28533	2.78547
ASHGA5P019281	10.4351	10.4351	3.38337	up	noncoding	NR_038455	LOC100507389	RefSeq	1827	chr3	+	142645516	142661378		CACCACACAAGCTAACCTGATGTACATATGACATTAATCCAATAGACTTAGGAATAAGAT	100507389	intergenic							13132.1	612.198	12.5253	9.14189
ASHGA5P050265	25.7757	25.7757	4.68794	up	noncoding	TCONS_00000801	XLOC_000017	LincRNAs identified by Cabili et al	481	chr1	+	1317608	1318166	TCONS_00000802	AATCCAGTAACAATCCAGAGGTCACCACCCTTCCCAACAATCCAGTAACAATCCAGAGGC		intergenic							9069.65	185.054	11.9136	7.22571
ASHGA5P045562	51.5521	51.5521	5.68796	up	noncoding	ENST00000457302	RP11-229P13.20	GENCODE	697	chr9	-	139931491	139932407		TCCACGTTCAGTCCCTCAGGTCACAATACACACCTATCCTGCTGGCCTGACGCAGGGGCC		intergenic							21680.2	253.466	13.4097	7.72175
ASHGA5P057487	2.37833	2.37833	1.24995	up	noncoding	TCONS_00018282	XLOC_008558	LincRNAs identified by Cabili et al	264	chr10	+	92618126	92621421		ATTCTTCAAGTTTTCTGGTGTTTAAAAGCCATATCAAGGTGTTGCTTCCTTCTTCCCTCC		intergenic							202.848	72.2513	6.9667	5.71676
ASHGA5P042233	43.42	43.42	5.44029	up	noncoding	ENST00000454882	RP3-380B8.4	GENCODE	412	chr6	+	5851738	5870453		GCCCACACATAAGCTGAAGTATTGCCTTATGACATATTCTGAATATTCCAATTATTTTGC		intergenic							396.762	5	7.76154	2.32125
ASHGA5P056322	11.6348	11.6348	3.54038	up	noncoding	TCONS_00002468	XLOC_001009	LincRNAs identified by Cabili et al	317	chr1	-	148933290	148951501		ACTGCCAAAGAGTCTTGGAGCCTCCCTTCTGCTCCCAGAGGCTTTTCTTGCTCATGTCTC		intergenic							4070.44	179.7	10.7223	7.18191
ASHGA5P042977	9.00103	9.00103	3.17009	up	noncoding	ENST00000580902	AC005154.6	GENCODE	926	chr7	-	30563590	30603614	ENST00000426529, ENST00000434399, ENST00000440438, ENST00000577889, ENST00000578293, ENST00000578572, ENST00000582838, NR_038889, uc003tbd.3, uc003tbe.2	AGAACCAAATGACAGCAATAGCCAAGTGTAATCATCAGTAACCCTGTGTTCTATCCACAG		intergenic							59.3821	5	5.49134	2.32125
ASHGA5P022384	37.4285	37.4285	5.22607	up	noncoding	ENST00000555875	RP11-543C4.3	GENCODE	493	chr14	-	100157781	100159985		TACCACTTCCCAACTTATCCTATGAGAGTCACCACAGCCACCCTCCATTGCAGAGAATTG		natural antisense	NM_006668	CYP46A1	cholesterol 24-hydroxylase precursor	+	100150754	100193638	26813.3	430.357	13.7894	8.56335
ASHGA5P054666	3.76588	3.76588	1.91299	up	noncoding	ENST00000436715	H19	GENCODE	861	chr11	-	2016668	2017801		GCGAGAGGAGCTGAGTGGGACCTCACTCCTTCCCCATCCACAGAAATGGTGCTACCCAGC	283120	intergenic							404.663	79.5621	7.78202	5.86903
ASHGA5P057245	2.33061	2.33061	1.22071	up	noncoding	TCONS_00014917	XLOC_006983	LincRNAs identified by Cabili et al	233	chr8	-	5858958	5860627	TCONS_00014916	TCTCCAGTTTTGACATCCTAGCCCCAGCAGATGATGCACCTAAAGTTGAAAAGCTGACTT		intergenic							35.3195	18.0707	4.82947	3.60876
ASHGA5P029929	466.409	466.409	8.86545	up	noncoding	ENST00000561054	RP11-720L8.1	GENCODE	463	chr15	-	37657227	37783009		TGGGGAACCAGCAAACTCATTCACTTACAATCAAGAACAAACCGATTAAATTGAATAAAG		intergenic							5608.91	5	11.1867	2.32125
ASHGA5P036397	2.3551	2.3551	1.23579	up	noncoding	uc001bkd.1	AX747205	UCSC_knowngene	2415	chr1	-	25629228	25631643		CTGAGACTGATGATAACTTGCTATGTGTTCTTTTTTCTGCCCTTCCTCCTTTCATTTCAG		natural antisense	NM_001127691	RHD	blood group Rh(D) polypeptide isoform 2	+	25598980	25656936	2829.08	540.662	10.1747	8.93892
ASHGA5P036397	2.3551	2.3551	1.23579	up	noncoding	uc001bkd.1	AX747205	UCSC_knowngene	2415	chr1	-	25629228	25631643		CTGAGACTGATGATAACTTGCTATGTGTTCTTTTTTCTGCCCTTCCTCCTTTCATTTCAG		natural antisense	NM_016124	RHD	blood group Rh(D) polypeptide isoform 1	+	25598980	25656936	2829.08	540.662	10.1747	8.93892
ASHGA5P048136	38.7266	38.7266	5.27525	up	noncoding	AW833912R		LincRNAs identified by Khalil et al	689	chr3	+	172556888	172557496		TGCCTATTTTCTCCGTATTTGCAAGCCTTACTTGATGCTCTACTCTTCTTCCCAGGCTGA		intergenic							394.421	7.36665	7.75348	2.47823
ASHGA5P056528	11.3874	11.3874	3.50937	up	noncoding	TCONS_00005360	XLOC_002543	LincRNAs identified by Cabili et al	715	chr2	-	241320859	241322761		AGGAACCGGTGAGAATATGTGGTCCCATACTTTTGCTTTCCTTTCCTACCTTCTCATCCT		intergenic							562.767	37.0168	8.19512	4.68575
ASHGA5P031469	2.00598	2.00598	1.00431	up	noncoding	TCONS_00006004	XLOC_002630	LincRNAs identified by Cabili et al	689	chr3	+	44469431	44470957		AGAATGAAGCAGAGGGCTGTGGGGTGAAGGGACTGCCAGTCTTCTGCCACTCCTTTTCGT		intergenic							19.6416	12.1267	4.04761	3.0433
ASHGA5P018013	100.79	100.79	6.65521	up	noncoding	ENST00000448371	RP11-157P1.4	GENCODE	307	chr20	-	60880487	60881452		TCCCAGGAAACCCTGAGCTCACAGCACCCACGCACACCCCGAATGGCTATGGAAGCTGCA		intronic antisense	NM_007002	ADRM1	proteasomal ubiquitin receptor ADRM1 precursor	+	60878026	60883918	43694.1	308.636	14.6957	8.04045
ASHGA5P018013	100.79	100.79	6.65521	up	noncoding	ENST00000448371	RP11-157P1.4	GENCODE	307	chr20	-	60880487	60881452		TCCCAGGAAACCCTGAGCTCACAGCACCCACGCACACCCCGAATGGCTATGGAAGCTGCA		intronic antisense	NM_175573	ADRM1	proteasomal ubiquitin receptor ADRM1 precursor	+	60878026	60883918	43694.1	308.636	14.6957	8.04045
ASHGA5P000171	3.9673	3.9673	1.98816	up	noncoding	chr1:47977525-47990050-	chr1:47977525-47990050	LincRNAs identified by Khalil et al	12525	chr1	-	48204938	48217463		ACCCACCCAGCCACTTGATTTTTCCCACCTTTAAGTTCCTATGGTACTTACTTCTGGTGA		intergenic							26697.5	3445.76	13.7849	11.7967
ASHGA5P044131	24.3559	24.3559	4.6062	up	noncoding	ENST00000416902	USP17L7	pseudogene	1593	chr8	-	11989925	11991518	ENST00000527080, NM_001256854, NM_001256871, NM_001256873, NM_001256874, NM_001256894, NM_201402	GGTATGAAAAACCATCATCCTGAACAGCAAAGCTCCCTGCTAAACCTCTCTTCGACGAAA									14550.4	323.019	12.7153	8.10907
ASHGA5P015046	3.3569	3.3569	1.74713	up	noncoding	ENST00000415965	AC002456.2	GENCODE	317	chr7	-	90219932	90225062		ACTGGGTGCGGTAATTGTACATTTTTTCATCCTACATCTCAAGAGACCAAGGGACCTAAG		intronic antisense	ENST00000430760	CDK14	cyclin-dependent kinase 14 [Source:HGNC Symbol;Acc:8883]	+	90193087	90419943	19.9806	5	4.06838	2.32125
ASHGA5P015046	3.3569	3.3569	1.74713	up	noncoding	ENST00000415965	AC002456.2	GENCODE	317	chr7	-	90219932	90225062		ACTGGGTGCGGTAATTGTACATTTTTTCATCCTACATCTCAAGAGACCAAGGGACCTAAG		intronic antisense	ENST00000446224	CDK14	cyclin-dependent kinase 14 [Source:HGNC Symbol;Acc:8883]	+	90193087	90419942	19.9806	5	4.06838	2.32125
ASHGA5P015046	3.3569	3.3569	1.74713	up	noncoding	ENST00000415965	AC002456.2	GENCODE	317	chr7	-	90219932	90225062		ACTGGGTGCGGTAATTGTACATTTTTTCATCCTACATCTCAAGAGACCAAGGGACCTAAG		intronic antisense	ENST00000449528	CDK14	cyclin-dependent kinase 14 [Source:HGNC Symbol;Acc:8883]	+	90095737	90419943	19.9806	5	4.06838	2.32125
ASHGA5P015046	3.3569	3.3569	1.74713	up	noncoding	ENST00000415965	AC002456.2	GENCODE	317	chr7	-	90219932	90225062		ACTGGGTGCGGTAATTGTACATTTTTTCATCCTACATCTCAAGAGACCAAGGGACCTAAG		intronic antisense	ENST00000456689	CDK14	cyclin-dependent kinase 14 [Source:HGNC Symbol;Acc:8883]	+	90193087	90419943	19.9806	5	4.06838	2.32125
ASHGA5P058916	88.6932	88.6932	6.47075	up	noncoding	uc.268+	uc.268	UCR	251	chr9	+	125606827	125607078		ACAGCAAAAACACACAGAATTCACTCTTTGCTATTCACTATCATCACAACCCTCATTGTT		intronic antisense	ENST00000373670	RC3H2	ring finger and CCCH-type domains 2 [Source:HGNC Symbol;Acc:21461]	-	125606834	125660389	23776.3	170.385	13.5628	7.09209
ASHGA5P057364	421.092	421.092	8.71799	up	noncoding	TCONS_00016354	XLOC_007734	LincRNAs identified by Cabili et al	1073	chr9	-	75705955	75726824		CATCACCAAGGTCCATATTATATACTGTGATATTCCAGCTGCACAGCGAAGAATCCGTCA		intergenic							5030.23	5	11.0392	2.32125
ASHGA5P041490	7.73468	7.73468	2.95134	up	noncoding	TCONS_00020480	XLOC_009811	LincRNAs identified by Cabili et al	302	chr12	+	77407016	77407562		CAGTCTTTCAAAACTTCTGTTTCAGGAGAACACACATCATTTCCATCTAGTTTCTTTAGA		intergenic							389.788	39.8162	7.74344	4.7921
ASHGA5P017750	2.5888	2.5888	1.37228	up	noncoding	ENST00000445382	AC017099.3	GENCODE	537	chr2	+	98292283	98319224		GCTAAACCAGATCTCCTCTGGCAAACACGACATATAATATTTTTATAATGGATGGAAAGA		intergenic							31.86	14.8239	4.69507	3.32279
ASHGA5P032044	7.7517	7.7517	2.95451	up	noncoding	ENST00000565635	AC137934.1	GENCODE	377	chr16	+	90282435	90285872		TCCCACTTGCATGCTTCCAAGCCTTCAAAACATACTCATCTCCATGTTCTGTGAATTAGC		intergenic							256.371	28.5522	7.24018	4.28566
ASHGA5P048383	2.836	2.836	1.50386	up	noncoding	ENST00000545958	RP11-856F16.2	GENCODE	593	chr11	-	94607216	94658686		AGTGAAACTCTAGCTTCAGAGACCTGACTCCAACTTCTCCAGTTCCATATAATATCCTGG		natural antisense	NM_130847	AMOTL1	angiomotin-like protein 1	+	94501507	94609918	90.8291	32.8024	6.00141	4.49755
ASHGA5P039900	3.01877	3.01877	1.59396	up	noncoding	ENST00000515422	RP11-395I6.2	GENCODE	553	chr4	+	40267091	40268077		AGCTCTTTACTTTCTCCATCGAGGCATCCACCAAACTCTACAAAATCTAGTTAATTGCTC		intergenic							442.583	104.158	7.8898	6.29584
ASHGA5P039524	2.13343	2.13343	1.09318	up	noncoding	TCONS_00022439	XLOC_010775	LincRNAs identified by Cabili et al	278	chr14	+	25719559	25721093		AGCTGATGTGCCCAAGAACTGAGCCCAAGTCTTAGCACAAGATCTCCATCCATCAAATAA		intergenic							10891.3	2188.41	12.2082	11.115
ASHGA5P028014	111.886	111.886	6.80588	up	noncoding	ENST00000457402	RP11-470L19.2	GENCODE	2351	chr1	-	111030301	111032880		AAGGGGGTCTTCAACAAAATCTACACTTTGGATTGAAACTGCCACCCAAACGCAAATCCC		intergenic							4223.61	23.1759	10.7801	3.97423
ASHGA5P027484	623.111	623.111	9.28335	up	noncoding	ENST00000550324	RP11-511B23.2	GENCODE	579	chr12	-	93397190	93532908		CAGCACTAACATCCACATTTAATTTGTTGCTTTATTTAACACCATCATCTGCTTTCAGGG		intergenic							42317.5	56.7886	14.6229	5.33954
ASHGA5P027678	64.2577	64.2577	6.0058	up	noncoding	ENST00000537478	RP11-407A16.3	GENCODE	654	chr12	-	127148224	127174814		ACTGGCATATATCACCAGGACCACCTCCAAGTAATTGACTAATAAATAAAAGCTCTATTA		intergenic							1875.54	18.6651	9.65898	3.65319
ASHGA5P039991	272.502	272.502	8.09012	up	noncoding	uc021xph.1	FW340024	UCSC_knowngene	5651	chr4	+	77953942	77959593		GCATTCACCATCACTGAATGCTGGTGCTGTCGCTCCTAATTTTCCTTTCTTTTTAATTTA		exon sense-overlapping	NM_018243	SEPT11	septin-11	+	77870894	77959768	23203.3	60.3989	13.5268	5.43665
ASHGA5P058249	4.18432	4.18432	2.06499	up	noncoding	TCONS_00028561	XLOC_013552	LincRNAs identified by Cabili et al	3706	chr20	+	47099590	47104748		AGAGCAGCATTGGCTCCTCCCCAGGTCTCCAGCTCCACCATCATCAAACTTGAATGGCAG		intergenic							54217.1	8257.4	15.1394	13.0744
ASHGA5P029622	6.3706	6.3706	2.67143	up	noncoding	TCONS_00008291	XLOC_003741	LincRNAs identified by Cabili et al	221	chr4	+	153602154	153602597		TAGTGTTGAGGCATCAGACACATCTCATCTCTAAACCTTTCCCTGCAGATCACCATCTGA		intergenic							628.824	69.9186	8.33912	5.66769
ASHGA5P022399	15.9871	15.9871	3.99884	up	noncoding	ENST00000556116	RP11-566K8.2	GENCODE	552	chr14	-	39308092	39417441	ENST00000557019	ATTAGCCCTGTGCCACACCCTACCTATGAGAAATCAGTGTTTACTGCAGAGAACACAGAA		intergenic							2169.26	78.5523	9.84554	5.84671
ASHGA5P015091	10.2068	10.2068	3.35146	up	noncoding	ENST00000542586	TP53TG1	GENCODE	219	chr7	-	86974512	86974802	uc003uip.4	CAGGCCGCGCTCCGCCCACGAAGGTCTGGCTTACCACACGCTCCTCCCCATTCCCAGTGA	11257	bidirectional	NM_001143935	CROT	peroxisomal carnitine O-octanoyltransferase isoform 1	+	86974950	87029112	9906.69	462.751	12.0396	8.68817
ASHGA5P015091	10.2068	10.2068	3.35146	up	noncoding	ENST00000542586	TP53TG1	GENCODE	219	chr7	-	86974512	86974802	uc003uip.4	CAGGCCGCGCTCCGCCCACGAAGGTCTGGCTTACCACACGCTCCTCCCCATTCCCAGTGA	11257	bidirectional	NM_001243745	CROT	peroxisomal carnitine O-octanoyltransferase isoform 3	+	86974950	86989425	9906.69	462.751	12.0396	8.68817
ASHGA5P015091	10.2068	10.2068	3.35146	up	noncoding	ENST00000542586	TP53TG1	GENCODE	219	chr7	-	86974512	86974802	uc003uip.4	CAGGCCGCGCTCCGCCCACGAAGGTCTGGCTTACCACACGCTCCTCCCCATTCCCAGTGA	11257	bidirectional	NM_021151	CROT	peroxisomal carnitine O-octanoyltransferase isoform 2	+	86974950	87029112	9906.69	462.751	12.0396	8.68817
ASHGA5P029651	2.53006	2.53006	1.33917	up	noncoding	TCONS_00008929	XLOC_003772	LincRNAs identified by Cabili et al	2060	chr4	+	170860020	170862823		TATAATGATATAATCTTCCTCATCCTCCCTCACTCGACTGAGTGGTGATGGACAGTGGAG		intergenic							46353.6	11184.6	14.8318	13.4927
ASHGA5P033218	2.23724	2.23724	1.16172	up	noncoding	TCONS_00016098	XLOC_007489	LincRNAs identified by Cabili et al	315	chr9	+	102648727	102657226		CACAGGTAGAAAGTCACTGCCCTTTGGAGAATAGATGTTTACCTTTTCCAGAAACAGTCG		intergenic							17.1012	9.45637	3.85572	2.694
ASHGA5P020258	2.80577	2.80577	1.4884	up	noncoding	ENST00000510550	RP11-90J7.3	GENCODE	595	chr10	+	80166300	80310614		CCGTGTTCAGAAAAAGTTTGCCAACTCCTGCTCTAGATTGATGGTTACAAAGTCTGACAG		intergenic							20.2856	8.8124	4.08995	2.60156
ASHGA5P058122	125.666	125.666	6.97345	up	noncoding	TCONS_00026676	XLOC_012769	LincRNAs identified by Cabili et al	257	chr18	-	11471227	11490670		CAAGGAACAGCTTCTTCTCTACGCATGGCTCTGTGTGCAGTGTTCGCCTGATTCTGAAGA		intergenic							1421.07	5	9.2947	2.32125
ASHGA5P041775	129.373	129.373	7.01539	up	noncoding	ENST00000458633	C4A-AS1	GENCODE	2095	chr6	-	31967752	31971298		CCACCACACCTTTCTCACATTTTCTCCCAGAGGTTACAGTAAATGTTCCAAAACTTTTTT		natural antisense	NM_001002029	C4B	complement C4-B preproprotein	+	31949833	31970458	54250.3	327.17	15.1428	8.12739
ASHGA5P041775	129.373	129.373	7.01539	up	noncoding	ENST00000458633	C4A-AS1	GENCODE	2095	chr6	-	31967752	31971298		CCACCACACCTTTCTCACATTTTCTCCCAGAGGTTACAGTAAATGTTCCAAAACTTTTTT		natural antisense	NM_001242823	LOC100293534	complement C4-B-like preproprotein	+	31949833	31970458	54250.3	327.17	15.1428	8.12739
ASHGA5P041775	129.373	129.373	7.01539	up	noncoding	ENST00000458633	C4A-AS1	GENCODE	2095	chr6	-	31967752	31971298		CCACCACACCTTTCTCACATTTTCTCCCAGAGGTTACAGTAAATGTTCCAAAACTTTTTT		natural antisense	NM_001252204	C4A	complement C4-A isoform 2 preproprotein	+	31949833	31970457	54250.3	327.17	15.1428	8.12739
ASHGA5P041775	129.373	129.373	7.01539	up	noncoding	ENST00000458633	C4A-AS1	GENCODE	2095	chr6	-	31967752	31971298		CCACCACACCTTTCTCACATTTTCTCCCAGAGGTTACAGTAAATGTTCCAAAACTTTTTT		natural antisense	NM_007293	C4A	complement C4-A isoform 1 preproprotein	+	31949833	31970457	54250.3	327.17	15.1428	8.12739
ASHGA5P055201	12.687	12.687	3.66528	up	noncoding	ENST00000534782	RP11-820L6.1	GENCODE	444	chr11	-	122026258	122073770	NR_024430	TTCTCCTCCTGTCCTGTAACTGGTTTTCACTCACTCAACTGAGAGATTTCTTTGTTGCAA		intergenic							28593.7	1253.77	13.917	10.2517
ASHGA5P000112	54.0065	54.0065	5.75506	up	noncoding	BF986711		LincRNAs identified by Khalil et al	245	chr2	+	3184560	3184961		ATTCCAGCACCGACACGGGGACGCTCACTATTCCAGCACCGACACGGGGACGCTCACTAT		intergenic							15579	170.015	12.8437	7.08869
ASHGA5P022112	3.90925	3.90925	1.96689	up	noncoding	NR_037715	RNASEK	RefSeq	1047	chr17	+	6915735	6917852		TCCGAATCCAATAATGCTCGGAATATTTTTCAATGTCCATTCCGCTGTGTTGATTGAGGA	440400	exon sense-overlapping	NM_001004333	RNASEK	ribonuclease kappa	+	6915735	6917852	3884.08	461.356	10.6492	8.68234
ASHGA5P025952	174.252	174.252	7.44503	up	noncoding	NR_047594	CENPJ	RefSeq	5246	chr13	-	25456411	25497027		ACATCCAGCTCTGTTACACTTTTTAACATGGAGGCAATCCACCTCGAAGATCCAAGTCTG	55835	exon sense-overlapping	NM_018451	CENPJ	centromere protein J	-	25456411	25497027	3572.53	12.5544	10.5373	3.09231
ASHGA5P043418	14.1397	14.1397	3.82168	up	noncoding	TCONS_00018246	XLOC_008522	LincRNAs identified by Cabili et al	3769	chr10	+	77185871	77190266		ATTTTTGTGATTTCTGCACATGATCCTTCCCCACACCATCAACTGGCCTTCTTGATGTGT		intergenic							4395.81	163.755	10.8439	7.02226
ASHGA5P022805	2.29744	2.29744	1.20003	up	noncoding	ENST00000563052	CTD-2049O4.1	GENCODE	679	chr16	-	27719746	27730097		AAACCACATCCCCAAATCCAGCGGGATCTCAGAGAGAAAGGCTGATGGGAAGCTGCCCAG		natural antisense	NM_015202	KIAA0556	uncharacterized protein KIAA0556	+	27561467	27791692	2559.05	514.84	10.0559	8.85586
ASHGA5P051054	47.9838	47.9838	5.58448	up	noncoding	uc002ydh.3	BC141903	UCSC_knowngene	222	chr20	-	61405786	61406753	NR_046224	CCACACACAGAGAGCTGCAGCCGATGCCGGCCGGTGACTTGGGACTTGGATGCTTAACAG		intergenic							13642.4	162.57	12.5946	7.01015
ASHGA5P019877	76.7221	76.7221	6.26157	up	noncoding	ENST00000504516	AP005901.1	GENCODE	550	chr18	-	15316483	15325918	NR_027417	AATATTGTAGGCTGGCCACACACCACTTTTATTGGCCATAAGGAAAAGAAGTGAGCAAAT		intergenic							44514.4	404.894	14.7254	8.4638
ASHGA5P052490	10.7476	10.7476	3.42594	up	noncoding	ENST00000521666	RP11-80G7.1	GENCODE	800	chr5	-	162910070	162921040	uc003lzi.3	CACTCAGGTTCTAATCATAGATTACCTTCCTTCTTCATCTTCCAGCTGTTTTCTAAAGTC		natural antisense	NM_001142556	HMMR	hyaluronan mediated motility receptor isoform a	+	162887516	162918953	13015.1	590.473	12.5098	9.08387
ASHGA5P052490	10.7476	10.7476	3.42594	up	noncoding	ENST00000521666	RP11-80G7.1	GENCODE	800	chr5	-	162910070	162921040	uc003lzi.3	CACTCAGGTTCTAATCATAGATTACCTTCCTTCTTCATCTTCCAGCTGTTTTCTAAAGTC		natural antisense	NM_001142557	HMMR	hyaluronan mediated motility receptor isoform d	+	162887516	162918953	13015.1	590.473	12.5098	9.08387
ASHGA5P052490	10.7476	10.7476	3.42594	up	noncoding	ENST00000521666	RP11-80G7.1	GENCODE	800	chr5	-	162910070	162921040	uc003lzi.3	CACTCAGGTTCTAATCATAGATTACCTTCCTTCTTCATCTTCCAGCTGTTTTCTAAAGTC		natural antisense	NM_012484	HMMR	hyaluronan mediated motility receptor isoform b	+	162887516	162918953	13015.1	590.473	12.5098	9.08387
ASHGA5P052490	10.7476	10.7476	3.42594	up	noncoding	ENST00000521666	RP11-80G7.1	GENCODE	800	chr5	-	162910070	162921040	uc003lzi.3	CACTCAGGTTCTAATCATAGATTACCTTCCTTCTTCATCTTCCAGCTGTTTTCTAAAGTC		natural antisense	NM_012485	HMMR	hyaluronan mediated motility receptor isoform c	+	162887516	162918953	13015.1	590.473	12.5098	9.08387
ASHGA5P045008	30.2301	30.2301	4.91791	up	noncoding	ENST00000529135	RP11-6D1.6	GENCODE	495	chr8	+	125952590	125966570		GAACCCATAGTGACCTTTCCTTCTGATTCTTCTTTTACTCTAAGGGCATGATTTTGGCAA		intergenic							3050.81	57.9603	10.2907	5.37274
ASHGA5P030960	2.3457	2.3457	1.23002	up	noncoding	NR_033824	RXRG	RefSeq	803	chr1	-	165406164	165414592		GTTTCCCGTTCCTCTGACATCTTGTAAATGCTTTTTGAATTAAAGATGATAACAGGCTTT	6258	exon sense-overlapping	NM_001256570	RXRG	retinoic acid receptor RXR-gamma isoform c	-	165370158	165414592	78.672	35.3845	5.83646	4.60644
ASHGA5P030960	2.3457	2.3457	1.23002	up	noncoding	NR_033824	RXRG	RefSeq	803	chr1	-	165406164	165414592		GTTTCCCGTTCCTCTGACATCTTGTAAATGCTTTTTGAATTAAAGATGATAACAGGCTTT	6258	exon sense-overlapping	NM_006917	RXRG	retinoic acid receptor RXR-gamma isoform a	-	165370158	165414592	78.672	35.3845	5.83646	4.60644
ASHGA5P039778	4.4368	4.4368	2.14952	up	noncoding	NR_015453	NOP14-AS1	RefSeq	3860	chr4	+	2937277	2952794		GACTGTGGGTGATGTTTCCCTTCTCTGATTTCTAAAATATCTGCAAACTTGTTTCATTTA	317648	natural antisense	NM_003703	NOP14	nucleolar protein 14	-	2939663	2965118	61.3905	15.586	5.54192	3.3924
ASHGA5P043094	28.0749	28.0749	4.81121	up	noncoding	NR_038378	LOC441242	RefSeq	1977	chr7	-	65111923	65235797		GTGTTAACGACCACACATTTTACACAAATGCCATGAATCCTTAAGGTGTTCCAATTTATA	441242	intergenic							1154.61	27.2894	9.03043	4.21922
ASHGA5P035012	2.85745	2.85745	1.51473	up	noncoding	ENST00000413669	AC009236.1	GENCODE	343	chr2	-	45401480	45402350	NR_033831	GTTGTCTTCCCTTCCTAGAAGCAATGCTTCTATGTTCTCATTTGATGTTGAATAAAACAT		intergenic							945.16	191.982	8.8002	7.28547
ASHGA5P044841	23.4862	23.4862	4.55374	up	noncoding	ENST00000531077	RP11-27P7.1	GENCODE	433	chr8	+	60962145	60987274		AGGGAGTGGAAACTTCACTTTCAACATCATCAGCCAACTTCCCTCCCATTACAATTCTAT		intergenic							9744.39	216.11	12.0205	7.46673
ASHGA5P043292	351.11	351.11	8.45578	up	noncoding	ENST00000421965	AC006159.4	GENCODE	692	chr7	-	116203647	116211288		CTTTAAATCCACTCACACCCAACTTTTAAACAAAAAGTAGCAGTATATCCTACACACGAT		intergenic							29862.9	64.6103	13.9945	5.53873
ASHGA5P049385	2.15494	2.15494	1.10765	up	noncoding	TCONS_00021990	XLOC_010590	LincRNAs identified by Cabili et al	431	chr13	-	45462117	45464410		ATTTTGGGGCATAAGTCCAACTGCCTAACTTCCCTTCTTCCTGCCTGTTTTCCTGAAGTT		intergenic							7826.96	1535.8	11.6786	10.5709
ASHGA5P034827	2.58961	2.58961	1.37273	up	noncoding	ENST00000427398	AC093326.1	GENCODE	510	chr2	-	490943	492655		CTGGCCATATTAACTCCTGCACAATACTAAGAAAAATAAATTGCACTAGCTGTGGAATAA		intergenic							15.2618	5	3.69399	2.32125
ASHGA5P038059	171.937	171.937	7.42574	up	noncoding	ENST00000449941	RP13-455A7.1	GENCODE	219	chr22	+	48256419	48257811		TATGCCAGCCCACACCACAGTCTTGGTCATCACTCCTGTTTCCATGGTGTTAACAGCAGC		intergenic							34529.4	145.214	14.2519	6.82616
ASHGA5P027177	2.79711	2.79711	1.48394	up	noncoding	TCONS_00011688	XLOC_005164	LincRNAs identified by Cabili et al	4004	chr6	+	8931542	8941204		CCACAAGCCCATTTTACTTCTGTTCAAACCAGGTTTGCTATTCTAATTTTGGAATTATGT		intergenic							16.455	5	3.80519	2.32125
ASHGA5P035122	41.4575	41.4575	5.37356	up	noncoding	ENST00000437233	AC084149.2	GENCODE	284	chr2	-	77879538	77881794		CATTTCTGATGGCTTTTATCCATCCTGCCCAAATAAAATAAACAAATTACCCTGCTACTT		intergenic							7085.78	94.9839	11.5201	6.14651
ASHGA5P058168	2.6479	2.6479	1.40485	up	noncoding	TCONS_00027248	XLOC_013278	LincRNAs identified by Cabili et al	1258	chr19	-	23708437	23748325	TCONS_00027718	ATGTGATGTGAGTCTCCTTCCTGACCCTTCCTGCAAGGATCTGTGGGACAGACCCAGCAG		intergenic							11199.3	1836.24	12.2503	10.8454
ASHGA5P052200	2.09027	2.09027	1.06369	up	noncoding	NR_027253	LOC285696	RefSeq	3316	chr5	-	17130136	17217531		CTCCTCCGGCGCAGACCCTCCCCTCTCCCCTCCAGCCTGGACACGCCCGCCTCCCCTTGA	285696	bidirectional	NM_006317	BASP1	brain acid soluble protein 1	+	17217749	17276943	91169.1	34189.3	16.0811	15.0174
ASHGA5P035206	35.5618	35.5618	5.15225	up	noncoding	ENST00000456519	AC010884.1	GENCODE	472	chr2	-	105552868	105654954		TCTCAATGTGTGCTCATGTTTCCTTAGGAGTTTGCACCCACTTCTCAGAGCTAACGAGAT		intronic antisense	NM_182640	MRPS9	28S ribosomal protein S9, mitochondrial	+	105654482	105716418	1814.87	31.9055	9.6097	4.45744
ASHGA5P040811	11.6693	11.6693	3.54464	up	noncoding	ENST00000518134	RP11-54C4.1	GENCODE	520	chr5	-	151145419	151145939		ACATTGGGGTGAGGCCATCACTTCATCCAGTGACTAGCACCACCTCTGGCAATGTCAGCC		intron sense-overlapping	ENST00000524142	ATOX1	ATX1 antioxidant protein 1 homolog (yeast) [Source:HGNC Symbol;Acc:798]	-	151122382	151152093	1030.94	57.1813	8.8933	5.34865
ASHGA5P027124	181.927	181.927	7.50722	up	noncoding	ENST00000483544	LINC00477	GENCODE	1710	chr12	-	24719897	24737102		AGGATTTCATACTTATTAAGATCCCTCTTTCTTCTTTAGGATTCCCAAGTAACTTGTCTC	144360	intergenic							2143.25	5	9.82847	2.32125
ASHGA5P030392	28.4655	28.4655	4.83114	up	noncoding	uc010azf.3	WHAMMP2	UCSC_knowngene	1948	chr15	+	28982728	28993563	ENST00000560810	CAAAACAAAGAAAGAAAAATGATTATTACCCCAATCCCATCATCTAGAGATGCTCAATGG	440253	intergenic							2306.11	48.4999	9.9349	5.10376
ASHGA5P016035	9.90655	9.90655	3.30838	up	noncoding	ENST00000426066	LL22NC03-80A10.6	GENCODE	1776	chr22	+	22657588	22677203	NR_027293	AACTCTAAGACTCACACAGTGCTCCAGACCCATGAGGAACAAAACACTGCAAAGTCATTC		intergenic							167.007	15.9224	6.732	3.42362
ASHGA5P030828	21.1409	21.1409	4.40196	up	noncoding	TCONS_00008433	XLOC_003880	LincRNAs identified by Cabili et al	261	chr4	-	9682415	9693365	ENST00000519726, NR_040091, NR_040092, TCONS_00006099	CTGCCACCCAGGCCAGAGTGCAGTTGACGCAGGGCAGGGGAGCCCCGAAATGGAGCATAG		intergenic							231.581	9.64895	7.12406	2.7221
ASHGA5P044461	2.67311	2.67311	1.41852	up	noncoding	TCONS_00018420	XLOC_008709	LincRNAs identified by Cabili et al	361	chr10	-	5605287	5606443		ACCTCACAGGTGACAGCAGCGTTTTGCTGACTCAGAGGCAACTACCACGATGACCCTCCA		intergenic							124.788	44.4885	6.38579	4.96727
ASHGA5P015407	3.20123	3.20123	1.67863	up	noncoding	ENST00000420006	SNHG11	GENCODE	720	chr20	+	37075352	37079500		CCTCCTCATGGCCAGGCCATCCAGTGGCCATCCTCCGTGTCCTCCCGCCTCCTCCTGGTG	128439	intergenic							9826.41	1342.43	12.0285	10.3499
ASHGA5P039795	3.61773	3.61773	1.85509	up	noncoding	NR_037863	LOC285484	RefSeq	1485	chr4	+	6202459	6235663	ENST00000508601	AAGCCCCACCACAATTGCATCTGTGTAAAATCGAGAGAAAGATCGTGAAAACAGCCATGG	285484	bidirectional	NM_001099433	JAKMIP1	janus kinase and microtubule-interacting protein 1 isoform 1	-	6027925	6202318	573.582	108.202	8.21708	6.362
ASHGA5P039795	3.61773	3.61773	1.85509	up	noncoding	NR_037863	LOC285484	RefSeq	1485	chr4	+	6202459	6235663	ENST00000508601	AAGCCCCACCACAATTGCATCTGTGTAAAATCGAGAGAAAGATCGTGAAAACAGCCATGG	285484	bidirectional	NM_144720	JAKMIP1	janus kinase and microtubule-interacting protein 1 isoform 2	-	6055481	6202318	573.582	108.202	8.21708	6.362
ASHGA5P016145	374.923	374.923	8.55045	up	noncoding	ENST00000427252	AC000093.3	GENCODE	560	chr22	-	19696896	19702318		GAGAGACACGAAAAATGTAAGGGGGTCACTGCACAAATCAGTCCTCATCACCGATGGGAA		natural antisense	NM_002688	SEPT5	septin-5 isoform 1	+	19701986	19710845	12130.9	21.0135	12.3872	3.83678
ASHGA5P030688	3.92694	3.92694	1.97341	up	noncoding	TCONS_00006333	XLOC_002952	LincRNAs identified by Cabili et al	1649	chr3	+	184433598	184457421		TAGGAATAAGAGTCTCAGAAGCCTTCCAAAGCAGATGTCTGCTTAAACCTCTTGAGCGGT		intergenic							24.3783	5.60742	4.32842	2.35501
ASHGA5P057251	108.176	108.176	6.75724	up	noncoding	TCONS_00014987	XLOC_007067	LincRNAs identified by Cabili et al	240	chr8	-	41041412	41042272		AAGCTGCCTGCTGCTGCCACAGGTCAACACCGTCACCACTCAACTGATATCTTACTGCTT		intergenic							12434.9	69.9558	12.426	5.66877
ASHGA5P018588	2.76731	2.76731	1.46848	up	noncoding	ENST00000455327	RP1-40E16.3	GENCODE	335	chr6	-	3051334	3053987		TGGCTGGAGGGACACCTGGCCTGGGTGGAGCCCACTCCTCAGCACCCACCTCACTTCTGG		intergenic							6357.71	978.683	11.3655	9.89698
ASHGA5P053673	7.80186	7.80186	2.96382	up	noncoding	uc010mkp.3	ATP8B5P	UCSC_knowngene	2511	chr9	+	35406751	35451105	ENST00000439972, NR_003582	TTTTTTTCTTTGTTTCTTTACAAATAGACATACTTCCCTTCCTTTCACAGGAGAAATGGT	158381	intergenic							12178.3	731.124	12.3957	9.43193
ASHGA5P017758	7.61754	7.61754	2.92933	up	noncoding	ENST00000445429	AC093415.2	GENCODE	532	chr3	-	37847568	37903219		TAGCCACCAGATGCCAAACACTGAGCAGGCTTTGTTCTCCACCCACAAACCAGAGGCTGT		intronic antisense	NM_002207	ITGA9	integrin alpha-9 precursor	+	37493812	37861281	1175.77	93.7321	9.05254	6.12322
ASHGA5P015007	2.74745	2.74745	1.45809	up	noncoding	ENST00000415627	AC108058.1	GENCODE	781	chr2	+	105990549	105992540		AGGAATGAAGCTTAAAGTATTTTCAGAAATCTGAGGGGAACATCACCTGTGCTTTATTGG		intronic antisense	NM_001039492	FHL2	four and a half LIM domains protein 2	-	105977282	106015575	16.1832	5	3.77935	2.32125
ASHGA5P015007	2.74745	2.74745	1.45809	up	noncoding	ENST00000415627	AC108058.1	GENCODE	781	chr2	+	105990549	105992540		AGGAATGAAGCTTAAAGTATTTTCAGAAATCTGAGGGGAACATCACCTGTGCTTTATTGG		intronic antisense	NM_001450	FHL2	four and a half LIM domains protein 2	-	105977282	106015681	16.1832	5	3.77935	2.32125
ASHGA5P015007	2.74745	2.74745	1.45809	up	noncoding	ENST00000415627	AC108058.1	GENCODE	781	chr2	+	105990549	105992540		AGGAATGAAGCTTAAAGTATTTTCAGAAATCTGAGGGGAACATCACCTGTGCTTTATTGG		intronic antisense	NM_201555	FHL2	four and a half LIM domains protein 2	-	105977282	106015681	16.1832	5	3.77935	2.32125
ASHGA5P015007	2.74745	2.74745	1.45809	up	noncoding	ENST00000415627	AC108058.1	GENCODE	781	chr2	+	105990549	105992540		AGGAATGAAGCTTAAAGTATTTTCAGAAATCTGAGGGGAACATCACCTGTGCTTTATTGG		intronic antisense	NM_201557	FHL2	four and a half LIM domains protein 2	-	105977282	106055230	16.1832	5	3.77935	2.32125
ASHGA5P048355	2.11873	2.11873	1.0832	up	noncoding	ENST00000532605	CTD-2555I5.1	GENCODE	585	chr11	-	80032663	80038955		TGAAGATTGAAAATGGGTATTGCAGAAAGACTACCATCCACATGAAGCCAAAAACGCAAA		intergenic							12.3264	5	3.40445	2.32125
ASHGA5P046770	33.4967	33.4967	5.06595	up	noncoding	ENST00000439472	TTTY10	GENCODE	340	chrY	-	22669139	22680293		CAGAGCAGGATTGGTAACTCCAAAAGACACCAGGACACATCCTAATTTTCTTAAATTTTA	246119	intergenic							1374.07	26.5983	9.24826	4.18231
ASHGA5P048879	32.4634	32.4634	5.02074	up	noncoding	TCONS_00025084	XLOC_012044	LincRNAs identified by Cabili et al	481	chr16	-	86256068	86256625	TCONS_00024763	TTCATTCTCAGTGAGTTCAAAATACTATTTTGGTTTGTCTCAGTTTCTTCCTCTCTCTCT		intergenic							278.137	5	7.342	2.32125
ASHGA5P020628	2.06405	2.06405	1.04548	up	noncoding	ENST00000517726	EVX1-AS	GENCODE	480	chr7	-	27281047	27286848		GTAGTAAATCATCTCTCACTCTCTCCTCCAAATGACTGATGGCCTTAAGTTTTCCACAGC		intronic antisense	NM_001989	EVX1	homeobox even-skipped homolog protein 1	+	27282163	27286192	4559.2	949.26	10.8941	9.84867
ASHGA5P043965	2.48143	2.48143	1.31117	up	noncoding	ENST00000506718	U66061.31	GENCODE	2762	chr7	+	142413073	142426272		AATAATTCCTTCCTTTGTCCTGTCAGCATAATGTGTATGGACCCTGCTAAGCAGCACCCA		intergenic							307.621	94.7895	7.45533	6.14416
ASHGA5P026587	8.4499	8.4499	3.07893	up	noncoding	ENST00000530525	RP11-805J14.3	GENCODE	497	chr11	+	69975402	69995729		AATGAATTCTTCTTAACCTATCCATCTTTTGTGCCAGATACATGCAGTACCTACACCCCA		intron sense-overlapping	NM_018043	ANO1	anoctamin-1	+	69924407	70035652	3621.87	217.214	10.5557	7.47677
ASHGA5P055084	3.17809	3.17809	1.66816	up	noncoding	ENST00000530422	SCARNA9	GENCODE	353	chr11	+	93454678	93455031		CCTAATCATTTCTGGGCAATGATGAAAAGGTTTTACTACTGATCTTTGTAACTATGATGG	619383	intron sense-overlapping	NM_033395	KIAA1731	centrosomal protein KIAA1731	+	93394815	93463522	55.3659	19.6957	5.40311	3.73494
ASHGA5P046267	2.73228	2.73228	1.45011	up	noncoding	NR_039980	LOC286437	RefSeq	2328	chrX	-	103366999	103369317		TTTACAGAAGCCTTTACCCATCCTGAGACTCAGTTCTGCTGTTGGTCTTCAGAGAAGTGT	286437	intron sense-overlapping	NM_001012755	SLC25A53	solute carrier family 25 member 53	-	103343897	103401708	88.9247	33.5863	5.97927	4.52917
ASHGA5P000075	3.14284	3.14284	1.65207	up	noncoding	AV722915		LincRNAs identified by Khalil et al	669	chr1	+	186489181	186489845		CAGTGTACTTGGGTGCTCATGTCACTAAAATACCTCATTTATCCCTCCCACCTTCTTCTG		intergenic							562.01	121.341	8.19274	6.54067
ASHGA5P046553	5.52149	5.52149	2.46506	up	noncoding	ENST00000430456	RP11-445O16.3	GENCODE	644	chrX	+	56999942	57001229		CAACTATTAGGACAAGAGAGGAAGGAGAAAAGCAGGCCCACGTCAGTTTAAAAATGCCAT		intergenic							34.1523	5	4.78631	2.32125
ASHGA5P016132	2.37095	2.37095	1.24546	up	noncoding	ENST00000427151	AC129929.5	GENCODE	1171	chr11	-	2349978	2399219		CGAAGAGCAGGTCAGAACTCGGTCACATGACCCTCATGCAACCACACTAACCATAGAGGT		natural antisense	NM_004356	CD81	CD81 antigen	+	2398546	2418649	160.021	60.3246	6.68031	5.43485
ASHGA5P032099	5.31302	5.31302	2.40953	up	noncoding	TCONS_00006440	XLOC_003044	LincRNAs identified by Cabili et al	1397	chr3	-	10766606	10780748		TGACAGCTTTCCTCCATCCAAGTGGCCCAACTGTGGTTCAGAAAATACAGCCTCATTAAA		intergenic							332.542	50.1265	7.5564	5.14686
ASHGA5P049899	2.44856	2.44856	1.29193	up	noncoding	TCONS_00002569	XLOC_001174	LincRNAs identified by Cabili et al	1030	chr1	-	207096851	207097961	TCONS_00001785	AGACAGAGCATAGAGTGCGCACACACACACTCATAGCCACACACCACGCAGTGACACACA		intergenic							125905	41754.7	16.551	15.2591
ASHGA5P048940	7.05586	7.05586	2.81882	up	noncoding	ENST00000571780	CTD-2611K5.6	pseudogene	12667	chr15	+	102291755	102305164		AACACCATCAGCACAGCTACGGGGGCCCGTGGACGACTCCTAGTTGCAGGTACAGAGCGT									21557	1536.16	13.3909	10.5721
ASHGA5P018017	705.674	705.674	9.46286	up	noncoding	ENST00000448389	RP11-575L7.8	GENCODE	390	chr9	+	86587147	86590692		TAACATCATCATCAAACAAAATGCAGTGAGGCATAAACTGTTGGGACATACCGCTCGGGG		natural antisense	NM_002140	HNRNPK	heterogeneous nuclear ribonucleoprotein K isoform a	-	86582997	86595569	24895.5	26.6657	13.649	4.18617
ASHGA5P018017	705.674	705.674	9.46286	up	noncoding	ENST00000448389	RP11-575L7.8	GENCODE	390	chr9	+	86587147	86590692		TAACATCATCATCAAACAAAATGCAGTGAGGCATAAACTGTTGGGACATACCGCTCGGGG		natural antisense	NM_031262	HNRNPK	heterogeneous nuclear ribonucleoprotein K isoform b	-	86582997	86595569	24895.5	26.6657	13.649	4.18617
ASHGA5P018017	705.674	705.674	9.46286	up	noncoding	ENST00000448389	RP11-575L7.8	GENCODE	390	chr9	+	86587147	86590692		TAACATCATCATCAAACAAAATGCAGTGAGGCATAAACTGTTGGGACATACCGCTCGGGG		natural antisense	NM_031263	HNRNPK	heterogeneous nuclear ribonucleoprotein K isoform a	-	86582997	86595184	24895.5	26.6657	13.649	4.18617
ASHGA5P032368	106.751	106.751	6.7381	up	noncoding	uc002how.1	AL832615	UCSC_knowngene	1604	chr17	-	36332085	36333689	uc010cul.1	CGTATCCACACAATGGTAATTATTGAAATGAGAGACTCAAAAGAAGATGGAACGTGAACT		intergenic							1182.31	5	9.05935	2.32125
ASHGA5P032828	2.71826	2.71826	1.44269	up	noncoding	ENST00000585275	RP11-849F2.4	GENCODE	548	chr17	+	8241014	8242076		CAGAAGGCATGACACCTCTAGGACCCATTCTCATCCTACATCCTCCTCTTTCTGGTGCTG		intergenic							27381.6	5139.22	13.8333	12.3906
ASHGA5P019090	14.3385	14.3385	3.84182	up	noncoding	ENST00000467677	AC068610.3	GENCODE	685	chr7	+	114719072	114765997		TCCAGCACCACTTAAAGCCACACTCTCCTCTTTGGTCTTTCCTGGTACGCAGCATACAAG		intergenic							21149.8	773.374	13.3639	9.52203
ASHGA5P022026	22.9296	22.9296	4.51914	up	noncoding	ENST00000547452	RP11-554D14.6	GENCODE	731	chr12	-	108233067	108257744	ENST00000551629	GACGAGAATGCCTCGCTCCTCCTAGGACGGGAGGAAAATCCCACAAATCCTGTCTACTCC		intergenic							488.15	16.8433	8.02148	3.50234
ASHGA5P027827	34.9645	34.9645	5.12782	up	noncoding	ENST00000541949	RP13-81N3.2	GENCODE	696	chr12	+	10902832	10929987		ATTAATCAGACTGATGAAAGAAAACATTGTAATATGTATAGCTCCTCCACGAAAAGTGTG		intergenic							314.775	5.65732	7.48538	2.35757
ASHGA5P039739	3.3073	3.3073	1.72565	up	noncoding	NR_046264	FLJ38576	RefSeq	2459	chr4	-	187110185	187112644		TATCTGCAAACTCTACTTACACACATCAAATCATAAAGGGTAGCAGGAAGTTGTTATGAA	651430	bidirectional	NM_207352	CYP4V2	cytochrome P450 4V2	+	187112673	187134617	19.6317	5	4.0469	2.32125
ASHGA5P018029	2.96287	2.96287	1.56699	up	noncoding	ENST00000448513	RP11-395B7.4	GENCODE	372	chr7	-	100657605	100660882		TCACTGGGCTGCGGCTGGGAAAAGTGAGACCCAGACGCTCCATCTCAGCTTCCCCATGTG		natural antisense	NM_001164462	MUC12	mucin-12 precursor	+	100612903	100662230	26.9002	10.9253	4.46334	2.89635
ASHGA5P018163	5.30556	5.30556	2.4075	up	noncoding	ENST00000450157	RP11-69E11.4	GENCODE	599	chr1	-	39987951	40007432		CACCTGCCAGAAACAAGGAGAGTCAGCAATTACCAGCCAGCCAAGGTCCTGGAAGCTGAC		natural antisense	NM_181809	BMP8A	bone morphogenetic protein 8A precursor	+	39957317	39995541	56.8737	12.0132	5.43684	3.02933
ASHGA5P037164	3.83391	3.83391	1.93882	up	noncoding	uc002ydg.1	AX747649	UCSC_knowngene	2501	chr20	+	61404868	61407369		TTGACAGAGATTTGGTTTTCACCACCATGACAGGACAATGATGATGGATGGAAGCTGTGG		intergenic							64.1026	18.6997	5.59513	3.65631
ASHGA5P028737	3.11202	3.11202	1.63785	up	noncoding	ENST00000568856	RP11-271M24.2	GENCODE	1315	chr13	+	25874261	25875576		AGTGCGGATTATGTCAGTACAGATGCTACGATAGAAGAACTAAAAAATGACAGAAATGGT		intergenic							18.3825	5	3.9591	2.32125
ASHGA5P036532	2.12837	2.12837	1.08975	up	noncoding	TCONS_00027231	XLOC_013270	LincRNAs identified by Cabili et al	337	chr19	-	23086797	23097056		CAGATTCATCAAGTCAGGCCCAAAATAGTAGACGTGACAGCACATTCCTACACTGAGAAG		intergenic							41.0954	22.4944	5.02192	3.93216
ASHGA5P028164	10.6877	10.6877	3.41788	up	noncoding	TCONS_00010097	XLOC_004562	LincRNAs identified by Cabili et al	1385	chr5	+	134601126	134603585		TCAAACATTTGGGAACCATAATAACACCATCTCGGCAGGAAGATAAAGGCTGGACAGGCA		intron sense-overlapping	ENST00000432382	CTC-203F4.1	HCG2045138; Uncharacterized protein [Source:UniProtKB/TrEMBL;Acc:G3V3D3]	+	134368969	134680375	72.6397	5.17318	5.74963	2.33175
ASHGA5P048876	40.9406	40.9406	5.35546	up	noncoding	TCONS_00024761	XLOC_012044	LincRNAs identified by Cabili et al	799	chr16	-	86254969	86259500	TCONS_00024760	TGAGTCGACGGTACACATGCCCTTCCACAACACAAAGGTCTCCACTTTGCCACGTGTCAC		intergenic							2874.89	41.4245	10.2051	4.84964
ASHGA5P019998	2.21014	2.21014	1.14414	up	noncoding	ENST00000506486	CTB-161M19.4	GENCODE	812	chr5	-	118342041	118373363	uc003ksb.3	CTTTCTAAGGGATTCCATCCAAGTTACCACATTATATTTGTTAATCACGTGTTCTTTGGC		intergenic							41.9017	22.0658	5.04771	3.90357
ASHGA5P015926	3.68493	3.68493	1.88164	up	noncoding	ENST00000424921	AP001055.6	GENCODE	475	chr21	-	45578897	45579959		GAGCGGAGGCGGCTGTGCCCAGGACTGCAATGGCCTCCCACACTACCTCACTACCCTGGT		intergenic							366.006	75.8335	7.67106	5.78942
ASHGA5P045621	3.24155	3.24155	1.69668	up	noncoding	ENST00000428006	RP11-536O18.1	GENCODE	477	chr9	+	13446524	13487510		ATCTCTGTCTCCAACCCACAAACCACATGCATCATAAATAAATTAAAATACCAAAACTTT		intergenic							1293.65	216.38	9.16687	7.47019
ASHGA5P046661	2.57011	2.57011	1.36183	up	noncoding	ENST00000441841	RP3-473B4.3	GENCODE	961	chrX	+	134083578	134087412		TAAGGAAGATTTGAAGATCAAAGACCTTCCTCTCTCTGGCTTCACATTTCTCATCACTAG		intergenic							1406.08	286.134	9.28371	7.92188
ASHGA5P046096	2.43331	2.43331	1.28292	up	noncoding	uc011mhl.1	AK097803	UCSC_knowngene	1681	chrX	-	3782438	3799884	NR_034031	ATCTCGACCTGCCAAGTATACAGCTAAAGCTGAGTTCATAAAAAGGGATGATTTGGCCGA		intergenic							14.2671	5	3.60417	2.32125
ASHGA5P029647	27.9045	27.9045	4.80242	up	noncoding	ENST00000555972	RP3-414A15.2	GENCODE	519	chr14	+	73989581	73997314		AATTTCTCACCATGCACTCACACAGCTATACAGCTGTCTCCAGAGATTACTCTGGAAACT		natural antisense	NM_001220484	HEATR4	HEAT repeat-containing protein 4	-	73945188	74025651	10550.9	201.079	12.1571	7.35472
ASHGA5P029647	27.9045	27.9045	4.80242	up	noncoding	ENST00000555972	RP3-414A15.2	GENCODE	519	chr14	+	73989581	73997314		AATTTCTCACCATGCACTCACACAGCTATACAGCTGTCTCCAGAGATTACTCTGGAAACT		natural antisense	NM_203309	HEATR4	HEAT repeat-containing protein 4	-	73945188	74025651	10550.9	201.079	12.1571	7.35472
ASHGA5P040469	12.6061	12.6061	3.65605	up	noncoding	ENST00000508486	RP11-5P22.3	GENCODE	661	chr5	-	65803371	65807432		TCTGGAATGTGAGTGTTTCCATACTTCCGTGGATGCAGCAAATTTATATAAAGCGTTATT		intergenic							88.7334	5	5.9773	2.32125
ASHGA5P021507	2.13003	2.13003	1.09087	up	noncoding	ENST00000533672	RP11-736K20.5	GENCODE	239	chr11	-	86632963	86636079		ACTCCCCTCGGTGACCAGTGGTCCTCCTTTCTGAAGGCTCTTGCTACAAAGGAAAGATGA		intronic antisense	ENST00000533902	PRSS23	protease, serine, 23 [Source:HGNC Symbol;Acc:14370]	+	86511562	86663886	271.984	99.8137	7.31466	6.22379
ASHGA5P029231	2.62988	2.62988	1.395	up	noncoding	ENST00000416869	RP11-108M9.4	GENCODE	336	chr1	-	17215036	17216137	uc001azs.1	TACTCCCAGAGCCCGCCCGGCAGGACCACCGAGCAAGGCCTTGGAAAACCAGAGAGATTA		intergenic							212.819	68.1855	7.02383	5.62884
ASHGA5P020543	4.10211	4.10211	2.03637	up	noncoding	ENST00000515569	CTC-575N7.1	GENCODE	462	chr5	-	129098185	129241354		GCATGAACCACTCATACTTGTCCAGAAATCAGCATGAGAAGATGATCAAAATTCATATAT		intronic antisense	NM_001257308	KIAA1024L	UPF0258 protein KIAA1024-like	+	129083883	129100756	24.9486	5	4.35762	2.32125
ASHGA5P020543	4.10211	4.10211	2.03637	up	noncoding	ENST00000515569	CTC-575N7.1	GENCODE	462	chr5	-	129098185	129241354		GCATGAACCACTCATACTTGTCCAGAAATCAGCATGAGAAGATGATCAAAATTCATATAT		natural antisense	NM_175856	CHSY3	chondroitin sulfate synthase 3	+	129240522	129522327	24.9486	5	4.35762	2.32125
ASHGA5P033684	2.78665	2.78665	1.47853	up	noncoding	ENST00000576266	ROCK1P1	GENCODE	560	chr18	+	112366	118327		CTCTTCCGAGGCCTCCAGCTCCCCCGGGGCCTCCGTTTCTGGGAAAGGGTTAGACACAGA	727758	intergenic							1386.1	263.501	9.26074	7.78221
ASHGA5P043539	4.1729	4.1729	2.06105	up	noncoding	ENST00000452700	AC003986.5	GENCODE	1526	chr7	+	19183915	19185876		TTCCTTTCCCTACCTTTACCTCCTACTCATATAAAATAGAGGATTTTATTCCAAGAGGAA		natural antisense	NM_152898	FERD3L	fer3-like protein	-	19184404	19185044	4848.54	533.285	10.9789	8.91786
ASHGA5P051533	7.58806	7.58806	2.92373	up	noncoding	ENST00000425674	RP11-493K19.3	GENCODE	565	chr3	-	50155597	50193453	ENST00000437204	TACCCAGCAGGACCACCCACCAGGAGACAGAAGAGAGAAAACTGTATATGAAGACAAGGA		intronic antisense	NM_004186	SEMA3F	semaphorin-3F precursor	+	50192847	50226508	1053.68	86.2354	8.91786	5.99413
ASHGA5P051533	7.58806	7.58806	2.92373	up	noncoding	ENST00000425674	RP11-493K19.3	GENCODE	565	chr3	-	50155597	50193453	ENST00000437204	TACCCAGCAGGACCACCCACCAGGAGACAGAAGAGAGAAAACTGTATATGAAGACAAGGA		natural antisense	NM_005778	RBM5	RNA-binding protein 5	+	50126340	50156397	1053.68	86.2354	8.91786	5.99413
ASHGA5P048201	8.17856	8.17856	3.03185	up	noncoding	DB338868		LincRNAs identified by Khalil et al	537	chr3	+	65012616	65013151		ATACCAAGTCAGGAGTCTCAGTCTTAAAAGACAGCACCCACTCCCAATACAGGAAAACAG		intergenic							12506.3	721.117	12.4357	9.4039
ASHGA5P042657	8.30278	8.30278	3.05359	up	noncoding	NR_033896	FLJ46906	RefSeq	1022	chr6	+	139012804	139018425		ATGGATCACCGGAGAGATCACTATATCAGGACATAGACTTGACTTTCAGGGTTGGAGGAA	441172	intronic antisense	ENST00000491526	NHSL1	NHS-like 1 [Source:HGNC Symbol;Acc:21021]	-	138768201	139013708	54.3087	5	5.37485	2.32125
ASHGA5P022762	5.00315	5.00315	2.32284	up	noncoding	ENST00000562349	CTC-420A11.2	GENCODE	714	chr16	+	61952224	61974601		ATGATACTCTGATCGAATTATACTCTGCTCCTTGCCCCATCTAATATTTATTTGCACATT		intronic antisense	NM_001796	CDH8	cadherin-8 preproprotein	-	61685914	62070739	4568.78	433.541	10.8968	8.57392
ASHGA5P039135	5.36731	5.36731	2.4242	up	noncoding	AA757150		LincRNAs identified by Khalil et al	508	chr13	-	97787992	97788497		TGAATGCTTACAGGTACGCTGGCACACACTACCAATGAAAAGGCTTTTTTAAAATAATGA		intergenic							71.5404	14.5924	5.72717	3.30297
ASHGA5P041090	61.0238	61.0238	5.9313	up	noncoding	uc003jpf.3	BC048141	UCSC_knowngene	918	chr5	+	53173885	53174803		CGAACCACACATTTTGATTAATCGCTGATATTATATGACTTCGTTGGATCCTACTGTTTT		intergenic							589.803	5	8.25255	2.32125
ASHGA5P036601	6.3931	6.3931	2.67652	up	noncoding	TCONS_00016825	XLOC_007764	LincRNAs identified by Cabili et al	319	chr9	-	90721375	90728344		AAAGCCATCCTCTCATTAAAGTAATTGGTCCGGCATATACTAAGCGTCAGGCACTTTTTT		intergenic							40.3855	5	4.99777	2.32125
ASHGA5P042075	805.572	805.572	9.65387	up	noncoding	ENST00000574864	RP11-55K22.2	GENCODE	1297	chr6	-	137221370	137222667		ACAACTCAAATGTTTGTGTTTAAAATACTGGTTGAGATCACCATCTTAATTTGAATAAAA		intronic antisense	NM_000288	PEX7	peroxisomal biogenesis factor 7	+	137143701	137235072	9426.2	5	11.9751	2.32125
ASHGA5P019320	22.1716	22.1716	4.47064	up	noncoding	ENST00000486162	NCOR1P1	pseudogene	291	chr20	-	26084124	26094622		CCACCAGCAGGATCCAGCATTTGGAGGCAAACATGAAGCTCCATCCTCTCCAATTCTGGG	149934								1665.99	46.2037	9.49358	5.02293
ASHGA5P057957	6.21978	6.21978	2.63686	up	noncoding	TCONS_00024405	XLOC_011722	LincRNAs identified by Cabili et al	221	chr16	+	51811735	51847468		TATCAGTCAAAACATAAGCTCCATGAAGAAAAAAGACTCTCTTCTCCCTTGCTGTTCTAA		intergenic							2042.64	174.966	9.77141	7.13454
ASHGA5P021482	8.15534	8.15534	3.02775	up	noncoding	ENST00000533203	RP11-514F3.5	GENCODE	151	chr11	+	36408070	36409800		CTTGCTCTAAGAAAAGAAATTGGTTCTTCCTTTCATCTACTTTTCCTGCCAGTGTTTATT		intron sense-overlapping	NM_001160167	PRR5L	proline-rich protein 5-like isoform a	+	36317724	36486754	212.433	23.5449	7.02084	3.9931
ASHGA5P021482	8.15534	8.15534	3.02775	up	noncoding	ENST00000533203	RP11-514F3.5	GENCODE	151	chr11	+	36408070	36409800		CTTGCTCTAAGAAAAGAAATTGGTTCTTCCTTTCATCTACTTTTCCTGCCAGTGTTTATT		intron sense-overlapping	NM_001160168	PRR5L	proline-rich protein 5-like isoform b	+	36397534	36486754	212.433	23.5449	7.02084	3.9931
ASHGA5P021482	8.15534	8.15534	3.02775	up	noncoding	ENST00000533203	RP11-514F3.5	GENCODE	151	chr11	+	36408070	36409800		CTTGCTCTAAGAAAAGAAATTGGTTCTTCCTTTCATCTACTTTTCCTGCCAGTGTTTATT		intron sense-overlapping	NM_024841	PRR5L	proline-rich protein 5-like isoform a	+	36397534	36486754	212.433	23.5449	7.02084	3.9931
ASHGA5P055876	643.543	643.543	9.32989	up	noncoding	ENST00000548475	AL589743.1	GENCODE	640	chr14	+	19650060	19691701	ENST00000413768, ENST00000432001, ENST00000447898, ENST00000549813, uc001vvl.4, uc001vvr.1, uc002zks.4, uc010ahe.1	ATACTGGTGCTTTTGGGTAGAAACCCTCATCCATATCCTGGTAAGGCTTGAAGTTGCACA		intergenic							16416.6	18.133	12.9433	3.61345
ASHGA5P000213	13.4059	13.4059	3.7448	up	noncoding	chr11:39334375-39350600-	chr11:39334375-39350600	LincRNAs identified by Khalil et al	16225	chr11	-	39377799	39394024		AACAAATCCTACTGCTTTCATCCTCCTACGTCATCGCAGTTTGCTTCACTCTATCGCATA		intergenic							3786.09	149.941	10.6197	6.87486
ASHGA5P043415	3.62466	3.62466	1.85784	up	noncoding	ENST00000497366	RP4-584D14.6	GENCODE	420	chr7	-	150076942	150080973		ATCTCCACACCTTCCACATGTAGATATCCTCAACGTTCTTCACAGAGGGGATGCCCGCAC		intronic antisense	NM_173680	ZNF775	zinc finger protein 775	+	150076405	150095719	33909.2	5016.57	14.2207	12.3629
ASHGA5P001605	238.388	238.388	7.89717	up	noncoding	NR_033814	DLST	RefSeq	2799	chr14	+	75348593	75370450		TGGGAGAAAGACATCTGTGCAGGTTCCATCACCAGCAAATGGCGTGATTGAAGCTCTTTT	1743	exon sense-overlapping	NM_001244883	DLST	dihydrolipoyllysine-residue succinyltransferase component of 2-oxoglutarate dehydrogenase complex, mitochondrial isoform 2 precursor	+	75348593	75358594	2890.07	5	10.2184	2.32125
ASHGA5P001605	238.388	238.388	7.89717	up	noncoding	NR_033814	DLST	RefSeq	2799	chr14	+	75348593	75370450		TGGGAGAAAGACATCTGTGCAGGTTCCATCACCAGCAAATGGCGTGATTGAAGCTCTTTT	1743	exon sense-overlapping	NM_001933	DLST	dihydrolipoyllysine-residue succinyltransferase component of 2-oxoglutarate dehydrogenase complex, mitochondrial isoform 1 precursor	+	75348593	75370450	2890.07	5	10.2184	2.32125
ASHGA5P057384	2.87998	2.87998	1.52606	up	noncoding	TCONS_00016564	XLOC_007326	LincRNAs identified by Cabili et al	628	chr9	+	33730334	33733329	TCONS_00015948, TCONS_00016565	AGGGATTCAAGCCTGTGTTGTCAAGCGAAAACAGAAAAGAGAAGGGAATTCCACCTTTGC		intergenic							33.4735	13.9638	4.76296	3.2369
ASHGA5P049782	2.18376	2.18376	1.12682	up	noncoding	ENST00000578022	RP11-112H10.4	GENCODE	725	chr17	+	56602900	56634338		GAGTGAGTTTAATTTCCCAAGGCAAGTCTGCCTGATTGTCCTCTCCTTTCCTTACCTTCA		natural antisense	NM_001038704	C17orf47	uncharacterized protein C17orf47	-	56618947	56621733	227.558	85.1155	7.10047	5.97365
ASHGA5P049782	2.18376	2.18376	1.12682	up	noncoding	ENST00000578022	RP11-112H10.4	GENCODE	725	chr17	+	56602900	56634338		GAGTGAGTTTAATTTCCCAAGGCAAGTCTGCCTGATTGTCCTCTCCTTTCCTTACCTTCA		natural antisense	NM_001198713	SEPT4	septin-4 isoform 4	-	56597610	56618179	227.558	85.1155	7.10047	5.97365
ASHGA5P049782	2.18376	2.18376	1.12682	up	noncoding	ENST00000578022	RP11-112H10.4	GENCODE	725	chr17	+	56602900	56634338		GAGTGAGTTTAATTTCCCAAGGCAAGTCTGCCTGATTGTCCTCTCCTTTCCTTACCTTCA		natural antisense	NM_001201457	TEX14	inactive serine/threonine-protein kinase TEX14 isoform c	-	56634037	56769416	227.558	85.1155	7.10047	5.97365
ASHGA5P049782	2.18376	2.18376	1.12682	up	noncoding	ENST00000578022	RP11-112H10.4	GENCODE	725	chr17	+	56602900	56634338		GAGTGAGTTTAATTTCCCAAGGCAAGTCTGCCTGATTGTCCTCTCCTTTCCTTACCTTCA		natural antisense	NM_001256782	SEPT4	septin-4 isoform 5	-	56597610	56618179	227.558	85.1155	7.10047	5.97365
ASHGA5P049782	2.18376	2.18376	1.12682	up	noncoding	ENST00000578022	RP11-112H10.4	GENCODE	725	chr17	+	56602900	56634338		GAGTGAGTTTAATTTCCCAAGGCAAGTCTGCCTGATTGTCCTCTCCTTTCCTTACCTTCA		natural antisense	NM_001256822	SEPT4	septin-4 isoform 6	-	56597610	56605408	227.558	85.1155	7.10047	5.97365
ASHGA5P049782	2.18376	2.18376	1.12682	up	noncoding	ENST00000578022	RP11-112H10.4	GENCODE	725	chr17	+	56602900	56634338		GAGTGAGTTTAATTTCCCAAGGCAAGTCTGCCTGATTGTCCTCTCCTTTCCTTACCTTCA		natural antisense	NM_004574	SEPT4	septin-4 isoform 1	-	56597610	56606778	227.558	85.1155	7.10047	5.97365
ASHGA5P049782	2.18376	2.18376	1.12682	up	noncoding	ENST00000578022	RP11-112H10.4	GENCODE	725	chr17	+	56602900	56634338		GAGTGAGTTTAATTTCCCAAGGCAAGTCTGCCTGATTGTCCTCTCCTTTCCTTACCTTCA		natural antisense	NM_031272	TEX14	inactive serine/threonine-protein kinase TEX14 isoform b	-	56634037	56769416	227.558	85.1155	7.10047	5.97365
ASHGA5P049782	2.18376	2.18376	1.12682	up	noncoding	ENST00000578022	RP11-112H10.4	GENCODE	725	chr17	+	56602900	56634338		GAGTGAGTTTAATTTCCCAAGGCAAGTCTGCCTGATTGTCCTCTCCTTTCCTTACCTTCA		natural antisense	NM_080415	SEPT4	septin-4 isoform 2	-	56597610	56609443	227.558	85.1155	7.10047	5.97365
ASHGA5P049782	2.18376	2.18376	1.12682	up	noncoding	ENST00000578022	RP11-112H10.4	GENCODE	725	chr17	+	56602900	56634338		GAGTGAGTTTAATTTCCCAAGGCAAGTCTGCCTGATTGTCCTCTCCTTTCCTTACCTTCA		natural antisense	NM_080416	SEPT4	septin-4 isoform 3	-	56597610	56609443	227.558	85.1155	7.10047	5.97365
ASHGA5P049782	2.18376	2.18376	1.12682	up	noncoding	ENST00000578022	RP11-112H10.4	GENCODE	725	chr17	+	56602900	56634338		GAGTGAGTTTAATTTCCCAAGGCAAGTCTGCCTGATTGTCCTCTCCTTTCCTTACCTTCA		natural antisense	NM_198393	TEX14	inactive serine/threonine-protein kinase TEX14 isoform a	-	56634037	56769416	227.558	85.1155	7.10047	5.97365
ASHGA5P044880	2.02335	2.02335	1.01674	up	noncoding	ENST00000518355	RP11-434I12.3	GENCODE	599	chr8	+	74271147	74275023		AAGTCTCTGCAGGAAGTAGAGTTATTTTCTCAGCACCACATCTGAGCGCATCTTCTAAGG		intergenic							11.7	5	3.338	2.32125
ASHGA5P033737	3.4134	3.4134	1.77121	up	noncoding	TCONS_00028366	XLOC_013721	LincRNAs identified by Cabili et al	459	chr20	-	30863238	30865358		TCAACCTTTCTAAAAGCTTTCACATCCATTATCTGACTGGTGTCTCAAACTGCTACTGAG		intergenic							20.324	5	4.09246	2.32125
ASHGA5P040674	2.26108	2.26108	1.17701	up	noncoding	uc003kwu.1	LOC553103	UCSC_knowngene	916	chr5	-	131701645	131705196	ENST00000457998	GGAGTAGTCAGCAATTACTTGCCTGAGGAAGGGAAGGCCTCCTCCTTTAAGAAAAGAATA	553103	bidirectional	NM_003060	SLC22A5	solute carrier family 22 member 5	+	131705400	131731306	30.5099	16.3951	4.64225	3.46524
ASHGA5P041878	2.34552	2.34552	1.22991	up	noncoding	ENST00000425089	RP11-524H19.2	GENCODE	586	chr6	-	54704915	54705653		ATTCTGTATCACTGGCTCCCAGACATATCATGTTTATTTGTACATCACACCTTTGCCCAC		intergenic							38.8712	19.4864	4.94885	3.71894
ASHGA5P041251	3.94786	3.94786	1.98107	up	noncoding	ENST00000503710	CTC-558O19.1	GENCODE	527	chr5	+	94314854	94316597		AATGATTACAGTTGCCACCATCTCCTTGATTATTAATTAAAGGCTTTTCTTCAATTATCA		intronic antisense	NM_001002796	MCTP1	multiple C2 and transmembrane domain-containing protein 1 isoform S	-	94042288	94417545	3238.03	391.057	10.3833	8.40225
ASHGA5P041251	3.94786	3.94786	1.98107	up	noncoding	ENST00000503710	CTC-558O19.1	GENCODE	527	chr5	+	94314854	94316597		AATGATTACAGTTGCCACCATCTCCTTGATTATTAATTAAAGGCTTTTCTTCAATTATCA		intronic antisense	NM_024717	MCTP1	multiple C2 and transmembrane domain-containing protein 1 isoform L	-	94042288	94620279	3238.03	391.057	10.3833	8.40225
ASHGA5P054426	4.24328	4.24328	2.08518	up	noncoding	ENST00000447412	RP11-291L22.3	GENCODE	3930	chr10	+	38692116	38737700		AAAGTGCCTAATAAATGTAAACGTGCTTAAATCTTTTGGCCCAGCTCCTACCTCCCGGCA		intergenic							487.549	82.8909	8.02043	5.93525
ASHGA5P022526	15.5273	15.5273	3.95674	up	noncoding	ENST00000558403	CTD-2314G24.2	GENCODE	532	chr5	-	50674408	50675509		AGAGATACCAGTGGAACTCCTAAGTGACCAGGAACAGACGATTTTTAACCGAGTTCTGCT		intergenic							113.963	5	6.27799	2.32125
ASHGA5P000170	2.29888	2.29888	1.20093	up	noncoding	chr1:46758275-46770275+	chr1:46758275-46770275	LincRNAs identified by Khalil et al	12000	chr1	+	46985688	46997688		GTTCCCACATTCATGGGCACACAGTCTTAGATACAGTCTTTTACTCATAGTCACACACTC		intergenic							33.5659	17.5589	4.76613	3.5652
ASHGA5P049592	2.85319	2.85319	1.51257	up	noncoding	ENST00000584675	SPAG5-AS1	GENCODE	1689	chr17	+	26942701	26944390		TTTATCCCTAGAATGGACTTAGAGGAAACCGAAGAAATCCCAAGCCACACCAAACAGGAC		natural antisense	NM_014680	KIAA0100	UPF0378 protein KIAA0100 precursor	-	26941457	26972177	41.9357	17.2444	5.04894	3.53637
ASHGA5P029886	28.1503	28.1503	4.81508	up	noncoding	ENST00000558671	CTD-3118D7.1	GENCODE	3355	chr15	-	29665805	29669160		AATCATCCCAGATCCCAACACTTAGAGATAGACAATTATATTTTGCTGTTTTGCCTTCCA		intron sense-overlapping	NM_015307	FAM189A1	protein FAM189A1	-	29412454	29862927	307.774	9.12623	7.45696	2.64188
ASHGA5P035245	15.5057	15.5057	3.95473	up	noncoding	ENST00000438409	AC016683.5	GENCODE	583	chr2	-	113931179	113932937		AACCTAGGCAGACCCACTTAGCTCACCTCCAAAGGACCCAAGAATGGATGGCTTGGCCTG		natural antisense	NM_012455	PSD4	PH and SEC7 domain-containing protein 4	+	113931559	113960677	791.041	36.1321	8.59802	4.64329
ASHGA5P033765	43.2535	43.2535	5.43474	up	noncoding	uc002kss.3	BC034578	UCSC_knowngene	1085	chr18	+	14089933	14091018		TTGGCAGTGAAAGAAATGCTATACTTGAGACACTAATCTCTTCCTCAAATTGAAACATCA		intergenic							395.165	5	7.756	2.32125
ASHGA5P047077	2.10152	2.10152	1.07143	up	noncoding	ENST00000443930	RP11-547D24.1	GENCODE	1954	chr1	-	1944651	1946969		ATTTATAAAATGCCGTGATTCAGGTCTCAGGGCACTGTCGCCCCTACTCACTTTGATGAA		intergenic							37.624	21.0908	4.91422	3.84279
ASHGA5P019867	5.14667	5.14667	2.36364	up	noncoding	ENST00000504332	RP11-521B24.3	GENCODE	1447	chr14	-	105883917	105886076		AGAGCATGAGGAAAGCAAAGCTGCAGCCTGAGATCTCCTTCCACCAACTCCTGGCATGGC		bidirectional	NM_001203258	MTA1	metastasis-associated protein MTA1 MTA1s	+	105886185	105937057	550.695	76.6748	8.17195	5.80831
ASHGA5P019867	5.14667	5.14667	2.36364	up	noncoding	ENST00000504332	RP11-521B24.3	GENCODE	1447	chr14	-	105883917	105886076		AGAGCATGAGGAAAGCAAAGCTGCAGCCTGAGATCTCCTTCCACCAACTCCTGGCATGGC		bidirectional	NM_004689	MTA1	metastasis-associated protein MTA1 MTA1	+	105886185	105937057	550.695	76.6748	8.17195	5.80831
ASHGA5P031365	7.33724	7.33724	2.87524	up	noncoding	ENST00000568458	RP11-558A11.3	GENCODE	469	chr16	-	84376069	84377013		AGTCCCAAAAGCCTTGCTTCCTTCCTTTCTCCTGGATAACCCACCTCTGCCTGCCACAGA		intergenic							58296.4	5190.78	15.2835	12.4083
ASHGA5P015123	203.791	203.791	7.67095	up	noncoding	ENST00000416924	RP11-484I6.6	GENCODE	361	chr13	+	103532285	103533517		CTTTAGGTATTTTTCAAGAAATAATGAAGAAAACATCAATATATCACCTACCATCATTTC		intergenic							2442.24	5.09028	9.99804	2.32709
ASHGA5P056269	2757.24	2757.24	11.429	up	noncoding	TCONS_00001565	XLOC_000905	LincRNAs identified by Cabili et al	300	chr1	-	88994517	88995568		ACGCTCTTCGGTGAAACTGAAATCACTCATTCATTCAAAAAGTGTTTACTGAGTAGCTTC		intergenic							39323.7	12.286	14.492	3.06295
ASHGA5P032625	3.04886	3.04886	1.60827	up	noncoding	ENST00000540802	RP11-84E24.2	GENCODE	578	chr17	-	70030247	70053871		TTCCTCTTTGGTAACCTCAATCCTGAAAGTTAGTGTGACAGGCCTACAGCTTTTTGTTCT		intergenic							23.6114	9.39033	4.29139	2.68312
ASHGA5P033562	4.27479	4.27479	2.09586	up	noncoding	ENST00000450226	RP11-261C10.2	GENCODE	823	chr1	-	243202215	243211826	ENST00000414688, ENST00000427373	TTTATTAATTCCTTACAAAAACTCCCTGAACTTTGGAACAGCTCTCAATTGCCTGTATTC		intergenic							39.793	10.8365	4.97953	2.88368
ASHGA5P021743	9.48118	9.48118	3.24507	up	noncoding	ENST00000539734	RERG-IT1	GENCODE	301	chr12	-	15265296	15267632		TAAAATCATCTTATAAGCTTCTCTCTGCTTGGTGACCACTCTGCTGTTGATCCACCAACC		intron sense-overlapping	NM_001190726	RERG	ras-related and estrogen-regulated growth inhibitor isoform 2	-	15260715	15374411	316.965	27.8538	7.49435	4.24929
ASHGA5P021743	9.48118	9.48118	3.24507	up	noncoding	ENST00000539734	RERG-IT1	GENCODE	301	chr12	-	15265296	15267632		TAAAATCATCTTATAAGCTTCTCTCTGCTTGGTGACCACTCTGCTGTTGATCCACCAACC		intron sense-overlapping	NM_032918	RERG	ras-related and estrogen-regulated growth inhibitor isoform 1	-	15260715	15374411	316.965	27.8538	7.49435	4.24929
ASHGA5P023821	142.422	142.422	7.15403	up	noncoding	HMlincRNA543-	HMlincRNA543	LincRNAs identified by Khalil et al	6267	chr8	-	108001782	108008049		CTGTTTAGATTATATCCAGTCACTCACATGTATTAATGCATTGCTTATATTGAGACAGGG		intergenic							1649.43	5	9.47528	2.32125
ASHGA5P038528	2.83045	2.83045	1.50103	up	noncoding	ENST00000488999	RP11-290K4.2	GENCODE	716	chr3	-	157734004	157806772		AATTTTAAAAATTTGGCATATCTTTTTAGAACTCAGTTATTACTTAAATCCATCCATCAT		intergenic							1867.71	332.928	9.65278	8.15175
ASHGA5P044107	2.27758	2.27758	1.1875	up	noncoding	ENST00000522765	RP11-115J16.2	GENCODE	454	chr8	-	9229479	9232475		GCTATAACCCCACTTCCGATGCAGACAGCAATTCCAATGCATTGCAGCTTTCAGGATTTT		intergenic							332.974	108.726	7.5575	6.37
ASHGA5P043538	2051.54	2051.54	11.0025	up	noncoding	ENST00000417460	AC003986.7	GENCODE	692	chr7	+	19159555	19161539		CACTCACTTCACTTGTATCAAAGAGTTGCTGGAATAACTGATGAAAGAATGCAAGAAATA		intergenic							20807.3	5	13.3237	2.32125
ASHGA5P055648	23.1825	23.1825	4.53497	up	noncoding	uc009vov.2	CROCCP2	UCSC_knowngene	1968	chr1	-	16944750	16957604	ENST00000362058, ENST00000412962, ENST00000421700, uc001aze.3, uc001azf.3, uc001azg.1	ACTCCACGCTCGCTTGCCCTGATTCTCTCCGCCCTGCACTTTTGCCAGCTGAAGGTCCAG	84809	intergenic							14155.3	328.854	12.6679	8.13298
ASHGA5P051309	3.79419	3.79419	1.92379	up	noncoding	uc001edb.3	BC023568	UCSC_knowngene	738	chr1	+	113499036	113506690	uc001edc.1	GCTGCGCCCCTGCTGAGCGGCGCGGAGCTACCACGCCCTGCCAGACTCGCCCTTGGGTCC		natural antisense	ENST00000429288	SLC16A1	solute carrier family 16, member 1 (monocarboxylic acid transporter 1) [Source:HGNC Symbol;Acc:10922]	-	113460381	113499635	442.452	84.7433	7.88951	5.96571
ASHGA5P053338	13.483	13.483	3.75307	up	noncoding	ENST00000494289	RP11-707F14.3	pseudogene	481	chr7	+	141611262	141611743		CTCCCAGTAAGTATGCCATTTGTTACCTTCTTCCTTTGTCAGTGATTGTAATAAGAAATT									3496.14	137.662	10.5022	6.74914
ASHGA5P033442	3.17387	3.17387	1.66624	up	noncoding	ENST00000493812	LGALS8-AS1	GENCODE	1430	chr1	-	236686370	236687800		CTGTAAACACACCAGCCAGAAATACAAATAAAGTTAAACAAAGTCATGTCAGCCACTTGG	100287902	intronic antisense	NM_201545	LGALS8	galectin-8 isoform a	+	236681513	236716279	24.4585	9.28343	4.33226	2.66602
ASHGA5P033442	3.17387	3.17387	1.66624	up	noncoding	ENST00000493812	LGALS8-AS1	GENCODE	1430	chr1	-	236686370	236687800		CTGTAAACACACCAGCCAGAAATACAAATAAAGTTAAACAAAGTCATGTCAGCCACTTGG	100287902	natural antisense	NM_006499	LGALS8	galectin-8 isoform a	+	236686738	236716279	24.4585	9.28343	4.33226	2.66602
ASHGA5P033442	3.17387	3.17387	1.66624	up	noncoding	ENST00000493812	LGALS8-AS1	GENCODE	1430	chr1	-	236686370	236687800		CTGTAAACACACCAGCCAGAAATACAAATAAAGTTAAACAAAGTCATGTCAGCCACTTGG	100287902	natural antisense	NM_201543	LGALS8	galectin-8 isoform b	+	236686738	236716279	24.4585	9.28343	4.33226	2.66602
ASHGA5P033442	3.17387	3.17387	1.66624	up	noncoding	ENST00000493812	LGALS8-AS1	GENCODE	1430	chr1	-	236686370	236687800		CTGTAAACACACCAGCCAGAAATACAAATAAAGTTAAACAAAGTCATGTCAGCCACTTGG	100287902	natural antisense	NM_201544	LGALS8	galectin-8 isoform b	+	236687026	236716279	24.4585	9.28343	4.33226	2.66602
ASHGA5P056405	3.53998	3.53998	1.82374	up	noncoding	TCONS_00003963	XLOC_001780	LincRNAs identified by Cabili et al	633	chr2	+	186031548	186085058	TCONS_00003962	GATTCAGACGGTTATCTTAACAGTCTGCAACAATATACTGAGAGAAGCACTAACGAAACT		intergenic							21.1065	5	4.14499	2.32125
ASHGA5P015210	12.5622	12.5622	3.65102	up	noncoding	ENST00000417942	XIST	GENCODE	724	chrX	-	73040490	73046136		TCTTTGAGCTTAGACACTTCATTTTCCTAGTCCATCCCTCATGAAAAATGACTGACCACT	7503	intergenic							2145.67	96.8337	9.82968	6.17866
ASHGA5P037089	4.03143	4.03143	2.01129	up	noncoding	ENST00000416646	RP11-347D21.2	GENCODE	456	chr20	+	46586765	46587347	uc002xts.1	TGTCCTCCAGCAGCTCTAGCCTGGATGCGGTCCCAGAGATAAATCATATCTCTTTAAAAA		intergenic							51.0959	14.4758	5.30047	3.28918
ASHGA5P056308	10.0272	10.0272	3.32584	up	noncoding	TCONS_00002106	XLOC_000318	LincRNAs identified by Cabili et al	739	chr1	+	101616108	101630503		AAACTCTCAGTCACACACACAAAACAGGAAACCAGCAGTTGTAATTTCTTCAGCAATTCT		intergenic							18932.8	943.141	13.1569	9.83103
ASHGA5P022807	2.21714	2.21714	1.1487	up	noncoding	ENST00000563062	RP11-405F3.4	GENCODE	804	chr16	-	57715035	57735642		GTGGGGAAGGATCCCTGGAGATCCCATCCATGTCATGTGGACATCATATCACATGATTCT		natural antisense	NM_032269	CCDC135	coiled-coil domain-containing protein lobo homolog	+	57728712	57765367	16.9141	9.44844	3.8415	2.6928
ASHGA5P022807	2.21714	2.21714	1.1487	up	noncoding	ENST00000563062	RP11-405F3.4	GENCODE	804	chr16	-	57715035	57735642		GTGGGGAAGGATCCCTGGAGATCCCATCCATGTCATGTGGACATCATATCACATGATTCT		natural antisense	NM_170776	GPR97	probable G-protein coupled receptor 97 precursor	+	57702156	57723290	16.9141	9.44844	3.8415	2.6928
ASHGA5P033000	12.0676	12.0676	3.59307	up	noncoding	ENST00000581240	RP11-68I3.5	GENCODE	270	chr17	+	27966644	27967843		ACTCCTCCCTACTCAAGGGTAACCTCCATCCTGAATTTTGTGCTTATCATTCCCTTTTTT		intronic antisense	NM_033389	SSH2	protein phosphatase Slingshot homolog 2	-	27952964	28257018	7828.6	317.292	11.6813	8.08822
ASHGA5P028089	2.59678	2.59678	1.37672	up	noncoding	TCONS_00010757	XLOC_004497	LincRNAs identified by Cabili et al	261	chr5	+	104079735	104099084		TGAATGAGCTCCTCACTGTAATTGATGGCATTTCCTGAAATGGCTGCGATCATTAGGGCT		intergenic							15.3118	5	3.69798	2.32125
ASHGA5P018260	9.54964	9.54964	3.25545	up	noncoding	uc001vgm.1	THSD1P1	UCSC_knowngene	3781	chr13	-	52741846	52865680		AAGTGCAAGCTTCCTCTTCAGACAAAAAATAATATCCAAAGATATTTTGGCACTAACAGC	374500	intergenic							109.523	11.5794	6.23273	2.97728
ASHGA5P023102	2.82255	2.82255	1.497	up	noncoding	ENST00000569922	LA16c-390E6.5	GENCODE	289	chr16	+	1495343	1496365		TTGCTCTAACAGGGACACTGAAGGCTCTGTCTCACGCACACGGGCACAGGCACGCAGGTG		natural antisense	NM_001114331	CLCN7	H(+)/Cl(-) exchange transporter 7 isoform b	-	1494933	1525085	20.8502	9.06243	4.12928	2.63228
ASHGA5P023102	2.82255	2.82255	1.497	up	noncoding	ENST00000569922	LA16c-390E6.5	GENCODE	289	chr16	+	1495343	1496365		TTGCTCTAACAGGGACACTGAAGGCTCTGTCTCACGCACACGGGCACAGGCACGCAGGTG		natural antisense	NM_001287	CLCN7	H(+)/Cl(-) exchange transporter 7 isoform a	-	1494933	1525085	20.8502	9.06243	4.12928	2.63228
ASHGA5P025895	16.3961	16.3961	4.03528	up	noncoding	NR_046035	CXCL1	RefSeq	1207	chr4	+	74735108	74737019		GCCGGCGCGCAGCAGTCAGTGAGTCTCTTCTTCCCTAGGAGCGTCCGTGGCCACTGAACT	2919	exon sense-overlapping	NM_001511	CXCL1	growth-regulated alpha protein precursor	+	74735108	74737019	978.58	40.0835	8.83717	4.80189
ASHGA5P019582	2.01865	2.01865	1.01339	up	noncoding	ENST00000493616	GLYCTK-AS1	GENCODE	445	chr3	-	52322598	52333040		GCAGAAGAAGATGGACAAGAGCCTAGAAGATCCCAGCCTTGCCACTGGGTATGAGCACAG		intronic antisense	NM_001144951	GLYCTK	glycerate kinase isoform 2	+	52321835	52327021	32.4725	19.3314	4.72108	3.70769
ASHGA5P019582	2.01865	2.01865	1.01339	up	noncoding	ENST00000493616	GLYCTK-AS1	GENCODE	445	chr3	-	52322598	52333040		GCAGAAGAAGATGGACAAGAGCCTAGAAGATCCCAGCCTTGCCACTGGGTATGAGCACAG		natural antisense	NM_145262	GLYCTK	glycerate kinase isoform 1	+	52321835	52329272	32.4725	19.3314	4.72108	3.70769
ASHGA5P042271	3.10306	3.10306	1.63369	up	noncoding	ENST00000449143	RP11-239H6.2	GENCODE	191	chr6	+	20212317	20294706		TGCTTAATCTGCCAGCCAGGGATCCAGAAGCACCATCTCCCTGTCTGCATTCTGATCACC		natural antisense	NM_001080480	MBOAT1	lysophospholipid acyltransferase 1	-	20100934	20212670	2874.66	432.549	10.2042	8.57049
ASHGA5P015639	152.335	152.335	7.25111	up	noncoding	ENST00000422150	RP11-252M18.3	GENCODE	243	chr9	+	3875583	3878809		ATACAAACCAAAAGCGGAAGAACTTCTTTCTCCTCTGGATGTCTGGGAGTAACCAGGTAG		intronic antisense	NM_001042413	GLIS3	zinc finger protein GLIS3 isoform a	-	3824127	4300035	2228.03	9.07099	9.88431	2.6332
ASHGA5P015639	152.335	152.335	7.25111	up	noncoding	ENST00000422150	RP11-252M18.3	GENCODE	243	chr9	+	3875583	3878809		ATACAAACCAAAAGCGGAAGAACTTCTTTCTCCTCTGGATGTCTGGGAGTAACCAGGTAG		intronic antisense	NM_152629	GLIS3	zinc finger protein GLIS3 isoform b	-	3824127	4152183	2228.03	9.07099	9.88431	2.6332
ASHGA5P046985	3.00787	3.00787	1.58874	up	noncoding	NR_046091	LOC728218	RefSeq	1195	chr10	-	89156330	89167457		TAACCAAGACCTCTGTAAGAATTCTGTCTTTGATTCCACAATAAAGTGGTGTGAAATTAC	728218	intergenic							17.6999	5	3.91	2.32125
ASHGA5P052361	2.92652	2.92652	1.54919	up	noncoding	ENST00000513687	RP11-159K7.2	GENCODE	541	chr5	+	111964553	111966262		CCTCTTTCTTTATAGCAAATTACACCATTAATGTCATCCTGGCGAATGAAACAAGAGAAT		intergenic							22.4959	9.36301	4.22747	2.67829
ASHGA5P015634	23.1807	23.1807	4.53485	up	noncoding	ENST00000422117	AC124997.1	GENCODE	2491	chr15	-	25729977	25823938		CACTCCCACACATGTTTGTAAACAATGCCATCAGGAATAAAAGTGTTTGAAGCTGAAGCT		intergenic							1177.82	33.3781	9.05585	4.521
ASHGA5P022192	79.2542	79.2542	6.30842	up	noncoding	ENST00000551905	RP11-341G23.2	GENCODE	478	chr12	-	104048557	104051773		TTTTTGTGGTAGATTCCCAGGTTTCTATTGGAAACAGACAAACCACCTCTTCTTCTCTCT		intronic antisense	NM_017564	STAB2	stabilin-2 precursor	+	103981068	104160502	815.484	5	8.62967	2.32125
ASHGA5P000454	5.13622	5.13622	2.36071	up	noncoding	chr5:3790400-3802175+	chr5:3790400-3802175	LincRNAs identified by Khalil et al	11775	chr5	+	3737400	3749175		AAGATACTTCTAAGGTGTGAGGCCACAGCTCTGAGGCTCCTGGGTGTCATCACCTTCTTG		intergenic							128.153	24.4926	6.41225	4.05154
ASHGA5P017651	3.11899	3.11899	1.64108	up	noncoding	ENST00000444169	RBMY2EP	GENCODE	534	chrY	-	23557033	23563448		TGAATGGAGAGAAATCATCCAAGCTCCCAAGAAACCAGGGATTATGCTCCACCATCTAGA	159125	intron sense-overlapping	ENST00000330758	CYorf17	chromosome Y open reading frame 17 [Source:HGNC Symbol;Acc:38732]	-	23544871	23613732	39.3178	14.8231	4.96364	3.32256
ASHGA5P026637	2.73062	2.73062	1.44923	up	noncoding	ENST00000487111	RP11-147I3.1	GENCODE	469	chr11	+	74624637	74630856		TTTCCTCTTCTCTTGGGGCCATATCAACTCCGGGATCTTGGTTATTTTGATATCCTACAG		intronic antisense	NM_001270380	XRRA1	X-ray radiation resistance-associated protein 1 isoform 2	-	74551954	74660232	95.7952	35.57	6.06599	4.61676
ASHGA5P026637	2.73062	2.73062	1.44923	up	noncoding	ENST00000487111	RP11-147I3.1	GENCODE	469	chr11	+	74624637	74630856		TTTCCTCTTCTCTTGGGGCCATATCAACTCCGGGATCTTGGTTATTTTGATATCCTACAG		intronic antisense	NM_001270381	XRRA1	X-ray radiation resistance-associated protein 1 isoform 3	-	74551954	74660232	95.7952	35.57	6.06599	4.61676
ASHGA5P026637	2.73062	2.73062	1.44923	up	noncoding	ENST00000487111	RP11-147I3.1	GENCODE	469	chr11	+	74624637	74630856		TTTCCTCTTCTCTTGGGGCCATATCAACTCCGGGATCTTGGTTATTTTGATATCCTACAG		intronic antisense	NM_182969	XRRA1	X-ray radiation resistance-associated protein 1 isoform 1	-	74551954	74660232	95.7952	35.57	6.06599	4.61676
ASHGA5P050955	3.44626	3.44626	1.78503	up	noncoding	ENST00000440595	RP5-1125A11.1	GENCODE	660	chr20	-	32580293	32582161		TTCTCAAAAGAACTCTTCCCTGAACACCTTGTCTCAAGATGTTCTCTAGTTTGTCTTCTT		intronic antisense	NM_007367	RALY	RNA-binding protein Raly isoform 2	+	32581457	32670991	243.632	58.8319	7.18112	5.39608
ASHGA5P050955	3.44626	3.44626	1.78503	up	noncoding	ENST00000440595	RP5-1125A11.1	GENCODE	660	chr20	-	32580293	32582161		TTCTCAAAAGAACTCTTCCCTGAACACCTTGTCTCAAGATGTTCTCTAGTTTGTCTTCTT		intronic antisense	NM_016732	RALY	RNA-binding protein Raly isoform 1	+	32581457	32670991	243.632	58.8319	7.18112	5.39608
ASHGA5P042284	16.4729	16.4729	4.04203	up	noncoding	TCONS_00020843	XLOC_010128	LincRNAs identified by Cabili et al	1401	chr12	-	72647333	72649521	NR_026837	TGACTGACACCTGGCTTTCCACCAAGACTCAATTTTCATAGCAAGCCTCATCATCATAAG		intergenic							1571.85	58.1569	9.41867	5.37664
ASHGA5P032313	29.5816	29.5816	4.88663	up	noncoding	ENST00000577218	MIR4523	GENCODE	762	chr17	-	27696734	27717795		ATCGTCACCATTTCACCATTATCAGCAACAGACTCTAGAAACAACTTGGTGAAGGCTTGA	100616122	intronic antisense	ENST00000583121	TAOK1	TAO kinase 1 [Source:HGNC Symbol;Acc:29259]	+	27717481	27802721	64757	1543.38	15.4731	10.5865
ASHGA5P032313	29.5816	29.5816	4.88663	up	noncoding	ENST00000577218	MIR4523	GENCODE	762	chr17	-	27696734	27717795		ATCGTCACCATTTCACCATTATCAGCAACAGACTCTAGAAACAACTTGGTGAAGGCTTGA	100616122	natural antisense	ENST00000261716	TAOK1	TAO kinase 1 [Source:HGNC Symbol;Acc:29259]	+	27717617	27878922	64757	1543.38	15.4731	10.5865
ASHGA5P055862	4.42901	4.42901	2.14698	up	noncoding	TCONS_00004488	XLOC_002383	LincRNAs identified by Cabili et al	1152	chr2	-	169197716	169200862		TGGTTTCTACCCCACACCCAATAAGAAAGAGGCTTAAGAGGAACATTAGTTCATGAGACT		intergenic							574.288	90.976	8.21992	6.07293
ASHGA5P022289	2.25684	2.25684	1.1743	up	noncoding	ENST00000553961	ACTN1-AS1	GENCODE	599	chr14	+	69446398	69454180		AGGGTCTCAGAGAGAATCACCTCCATCCCACCTACCTCACAGGATGGCTGTGCACATTCA		bidirectional	NM_001102	ACTN1	alpha-actinin-1 isoform b	-	69340839	69446083	30144.9	6946.22	14.0146	12.8403
ASHGA5P022289	2.25684	2.25684	1.1743	up	noncoding	ENST00000553961	ACTN1-AS1	GENCODE	599	chr14	+	69446398	69454180		AGGGTCTCAGAGAGAATCACCTCCATCCCACCTACCTCACAGGATGGCTGTGCACATTCA		bidirectional	NM_001130004	ACTN1	alpha-actinin-1 isoform a	-	69340839	69446083	30144.9	6946.22	14.0146	12.8403
ASHGA5P022289	2.25684	2.25684	1.1743	up	noncoding	ENST00000553961	ACTN1-AS1	GENCODE	599	chr14	+	69446398	69454180		AGGGTCTCAGAGAGAATCACCTCCATCCCACCTACCTCACAGGATGGCTGTGCACATTCA		bidirectional	NM_001130005	ACTN1	alpha-actinin-1 isoform c	-	69340839	69446083	30144.9	6946.22	14.0146	12.8403
ASHGA5P049028	2.9094	2.9094	1.54072	up	noncoding	uc021taz.1	HM587424	UCSC_knowngene	622	chr16	+	3048955	3050814		TCCTCCTCCAGGGTTCCATGGGGCCAATGGTTTTAGGAATAGTGAGTCAGACCCAGGGGA		intergenic							3079.02	486.761	10.3047	8.76394
ASHGA5P058688	6.52862	6.52862	2.70678	up	noncoding	uc.86+	uc.86	UCR	340	chr2	+	157660109	157660449		TAATTAGGAGGCCCTTCCCTTCCAGAGTTACTATTTCTATTGACATTTTCCATGCATGAG		intergenic							1257.39	112.691	9.1316	6.42482
ASHGA5P021991	717.457	717.457	9.48675	up	noncoding	ENST00000546563	RP11-123M21.1	GENCODE	395	chr12	+	79198127	79202279		CCGATGTTCAGATATATTAAATATGTGAGAAGGACTTGATTCAATCCATCATCACTGTGA		intergenic							8962.33	6.46713	11.889	2.40225
ASHGA5P037377	4.57076	4.57076	2.19243	up	noncoding	uc021wka.1	BC031638	UCSC_knowngene	3488	chr21	-	47740936	47744424		GAGCAGCTAGAGAAGAAGCCCCTAATGTTTACCTTCGTCCTCCCGGCCTCCACCTTTCTG		exon sense-overlapping	NM_058180	C21orf58	uncharacterized protein C21orf58	-	47721046	47743785	1815.55	208.724	9.61054	7.4181
ASHGA5P037377	4.57076	4.57076	2.19243	up	noncoding	uc021wka.1	BC031638	UCSC_knowngene	3488	chr21	-	47740936	47744424		GAGCAGCTAGAGAAGAAGCCCCTAATGTTTACCTTCGTCCTCCCGGCCTCCACCTTTCTG		natural antisense	NM_006031	PCNT	pericentrin	+	47744035	47865682	1815.55	208.724	9.61054	7.4181
ASHGA5P047414	84.0064	84.0064	6.39243	up	noncoding	TCONS_00014986	XLOC_007066	LincRNAs identified by Cabili et al	300	chr8	-	40788309	40810979		AAGAAAGCTGGCATGCGTTATAAAATCACAAGAATAGCCAGCACCATCTCCACAGGCTGT		intergenic							1219.9	9.47403	9.08945	2.69702
ASHGA5P035221	19.9665	19.9665	4.31951	up	noncoding	NR_029193	SH3RF3-AS1	RefSeq	2810	chr2	-	109743783	109746575		TGCTCGCTAGTCGCTGTCCTCCAGAGGATTCAGCAGGACCGTTCCTCTTCCTCGGCCGCG	100287216	natural antisense	NM_001099289	SH3RF3	SH3 domain-containing RING finger protein 3 precursor	+	109745996	110262207	1992.49	59.9548	9.74487	5.42537
ASHGA5P037711	21.0358	21.0358	4.39478	up	noncoding	uc003azp.1	AK057177	UCSC_knowngene	2229	chr22	-	41605125	41613360		CCAGGCTCCTCTGTGGATTTACAAATGATGATATTTTAACATGGTTCAAATAGAATACTG		natural antisense	NM_031488	L3MBTL2	lethal(3)malignant brain tumor-like protein 2	+	41601312	41627275	1418.84	42.576	9.29152	4.89675
ASHGA5P055675	2.13756	2.13756	1.09596	up	noncoding	uc001azs.1	BC070363	UCSC_knowngene	359	chr1	-	17215040	17216161		ACTGGTGATATGGGAAGGGCCCACTCACTGAACTAACTCCCTTCCCTCTACTCCCAGAGC		intergenic							1099.56	278.642	8.97297	7.877
ASHGA5P019415	24.0009	24.0009	4.58501	up	noncoding	ENST00000483163	AC008888.7	GENCODE	277	chr19	+	49141327	49183482		TCCTCGAAGGGGAGTCTCAGCGACCATGGGGGACACCATCCACTCCGTCAAGGGATTCTG		intronic antisense	NM_145807	NTN5	netrin-5 precursor	-	49164663	49176264	4799.63	109.571	10.9686	6.38355
ASHGA5P019415	24.0009	24.0009	4.58501	up	noncoding	ENST00000483163	AC008888.7	GENCODE	277	chr19	+	49141327	49183482		TCCTCGAAGGGGAGTCTCAGCGACCATGGGGGACACCATCCACTCCGTCAAGGGATTCTG		natural antisense	NM_001217	CA11	carbonic anhydrase-related protein 11 precursor	-	49141271	49149451	4799.63	109.571	10.9686	6.38355
ASHGA5P038456	146.646	146.646	7.1962	up	noncoding	NR_027070	PISRT1	RefSeq	531	chr3	-	138951833	138952364		ACCTTGTTATAAGAATAATGGCAAACACTGATACTCAAACAACACCACACTCGAAGCATT	140464	intronic antisense	ENST00000495075	MRPS22	mitochondrial ribosomal protein S22 [Source:HGNC Symbol;Acc:14508]	+	138724647	139075888	22222.6	100.839	13.4399	6.24366
ASHGA5P038456	146.646	146.646	7.1962	up	noncoding	NR_027070	PISRT1	RefSeq	531	chr3	-	138951833	138952364		ACCTTGTTATAAGAATAATGGCAAACACTGATACTCAAACAACACCACACTCGAAGCATT	140464	intronic antisense	ENST00000495225	MRPS22	mitochondrial ribosomal protein S22 [Source:HGNC Symbol;Acc:14508]	+	138829245	139065792	22222.6	100.839	13.4399	6.24366
ASHGA5P027485	4.65279	4.65279	2.2181	up	noncoding	ENST00000549930	RP11-511B23.2	GENCODE	249	chr12	-	93397533	93609455	ENST00000550324, NR_040096	TGAGCCACTGTGCCCGGCCAAATGAGCTATTTATGATGATCATAAGGACACAAGATAAGG		intergenic							272.525	48.3452	7.31634	5.09824
ASHGA5P034598	34.5509	34.5509	5.11065	up	noncoding	uc002ofk.1	AX747721	UCSC_knowngene	2460	chr19	+	37527089	37529549		TTATAGGATTTTGGCTGAGCACAAACACACAGCCCAGAAACACTTGCAGGTTAACAGCCT		intergenic							1304.75	24.7695	9.18011	4.06946
ASHGA5P031844	37.6386	37.6386	5.23414	up	noncoding	TCONS_00006552	XLOC_003175	LincRNAs identified by Cabili et al	809	chr3	-	86254390	86271969		AATCAGCTCTCACTCTTTGTTCAGTGTCTCTCAACCTGTGACCTGTGACTATTCAGACCA		intergenic							1605.59	27.1229	9.44488	4.21074
ASHGA5P023020	21.2116	21.2116	4.40678	up	noncoding	ENST00000567913	RP11-384K6.6	GENCODE	4749	chr4	+	119512927	119556134		TTTGGCCTCCCAACAACGTCTTTGGACTCAGCTCCTGCCTCTCAAAGGCCTGCACGGGCC		intergenic							12746.4	313.774	12.4748	8.068
ASHGA5P037112	58.7822	58.7822	5.87731	up	noncoding	ENST00000424252	RP4-724E16.2	GENCODE	1947	chr20	+	52169308	52191847		GTTCTCACCCACTGTTTCCATGATCACTCTCACAACAGAAAAATAAAATTGACAAGAAAA		intronic antisense	NM_006526	ZNF217	zinc finger protein 217	-	52183609	52199636	9883.4	95.8633	12.0384	6.16108
ASHGA5P030554	6.37021	6.37021	2.67134	up	noncoding	ENST00000559915	RP11-209E8.1	GENCODE	601	chr15	+	53408561	53421895		GAATTCAAGGGCCAAATGCTTTTTCGGCGTCTCCTTTTCTATCCTTCCCTTTCATGTGAC		intergenic							1261.2	115.906	9.13587	6.46453
ASHGA5P039039	66.2869	66.2869	6.05065	up	noncoding	ENST00000512398	RP11-319G6.3	GENCODE	273	chr3	+	139185271	139185637		CATGGCTCTGTAAATGGAGGCTGCCATCATCATAATATCATTATGAAGCCCCTGATCTCA		intronic antisense	NM_004164	RBP2	retinol-binding protein 2	-	139171725	139195352	4303.02	39.0637	10.8121	4.76147
ASHGA5P025736	2.47948	2.47948	1.31004	up	noncoding	NR_030717	SNAPC2	RefSeq	1458	chr19	+	7985866	7988136		CAACGCATGCTGTTGGACAGGATACGAGCTTGAAATCCGGGTCTTCCTCCAGCAGCTCAA	6618	exon sense-overlapping	NM_003083	SNAPC2	snRNA-activating protein complex subunit 2	+	7985193	7988136	14.5578	5	3.63129	2.32125
ASHGA5P049421	2.53571	2.53571	1.34239	up	noncoding	ENST00000578003	OR3A4P	GENCODE	325	chr17	+	3213279	3213604		ATTGCTATCAAGATCTCATTGATGATTGTTATCAACACCTCATCCTGCTTCTGCCACCAC	390756	intergenic							15.8854	6.56121	3.7534	2.41101
ASHGA5P049720	2.44481	2.44481	1.28973	up	noncoding	ENST00000411573	AC003665.1	GENCODE	1738	chr17	-	45976150	46018725	uc002imm.3	TTACCCTCTTCACTCATCTTTCCACCTTGCTCCAATAGATTGCTGACAGAAAAGTGAGAC		intronic antisense	NM_003110	SP2	transcription factor Sp2	+	45973515	46006323	14888	2738.49	12.7638	11.4741
ASHGA5P056313	7.47374	7.47374	2.90183	up	noncoding	TCONS_00002232	XLOC_000566	LincRNAs identified by Cabili et al	341	chr1	+	219391857	219419234		CCATCCAACCTACATAAGACTATGACTGGCTTCTGACAAAATCTAAACTGCACACTGTGG		intergenic							3034.32	204.535	10.2863	7.38445
ASHGA5P055237	217.095	217.095	7.76218	up	noncoding	ENST00000528482	RP11-627G23.1	GENCODE	3679	chr11	+	134336078	134357809		TTCCACCCACACGCTGTCCACTTCCTGGGGTACTGCTGTGGGCATGTGAGTGCTTGCTCC		intergenic							10594.9	30.7213	12.1594	4.39718
ASHGA5P057101	16.4817	16.4817	4.0428	up	noncoding	TCONS_00013350	XLOC_005989	LincRNAs identified by Cabili et al	341	chr7	+	13770980	13783205		ATCGGTCGTATTTCAAAATTTCAGCCACCATCCCGCAGCCAACGATAATATCTGACACTT		intergenic							4027.23	130.79	10.7138	6.67097
ASHGA5P030979	2025.17	2025.17	10.9838	up	noncoding	ENST00000568317	RP11-82O18.2	GENCODE	579	chr16	-	14789423	14800912		AATGAAATTTCTACACAACAATGTTCTTGTCTCAAGTCCAAGAATGCCTCCTACACCTCC		intergenic							20576.4	5	13.3051	2.32125
ASHGA5P029327	3.08729	3.08729	1.62634	up	noncoding	ENST00000554838	RP11-404P21.2	GENCODE	588	chr14	-	96709201	96710334		TGTAAATTTTTCTCATTCTCCAGGTTCTAGCCCTCCAGGTTCATTCCCTCCAGGTTCTAG		natural antisense	NM_000623	BDKRB2	B2 bradykinin receptor	+	96671134	96710666	762.165	154.873	8.55044	6.9241
ASHGA5P049077	97.4109	97.4109	6.60601	up	noncoding	ENST00000546674	MIR3179-1	GENCODE	676	chr16	+	14995355	14996031	ENST00000547549	TGTGATCCTGGGGTTGTTGAAGATGCCACCCATCTACATATTCTTTCAGATGCACAATAT	100422960	intergenic							10842.3	66.7458	12.1992	5.59321
ASHGA5P000405	166.238	166.238	7.37711	up	noncoding	chr3:72052025-72073225-	chr3:72052025-72073225	LincRNAs identified by Khalil et al	21200	chr3	-	71969335	71990535		ATATGACTACACATCACTCCCACTTTTTAAAACAGAACACCTGTTAACATCTGGTAGCGT		intergenic							9860.22	36.4471	12.0352	4.6581
ASHGA5P042376	135.312	135.312	7.08014	up	noncoding	NR_026717	STK19	RefSeq	1805	chr6	+	31938951	31949223		CAGCACTGACGGGCCTGAGGGACGACAAGTTGACGCTCCTTTCGTCATCACCTGGTCTAG	8859	exon sense-overlapping	NM_004197	STK19	serine/threonine-protein kinase 19 isoform 1	+	31939645	31949223	1562.31	5.15424	9.41084	2.33069
ASHGA5P042376	135.312	135.312	7.08014	up	noncoding	NR_026717	STK19	RefSeq	1805	chr6	+	31938951	31949223		CAGCACTGACGGGCCTGAGGGACGACAAGTTGACGCTCCTTTCGTCATCACCTGGTCTAG	8859	exon sense-overlapping	NM_032454	STK19	serine/threonine-protein kinase 19 isoform 2	+	31939645	31949223	1562.31	5.15424	9.41084	2.33069
ASHGA5P042376	135.312	135.312	7.08014	up	noncoding	NR_026717	STK19	RefSeq	1805	chr6	+	31938951	31949223		CAGCACTGACGGGCCTGAGGGACGACAAGTTGACGCTCCTTTCGTCATCACCTGGTCTAG	8859	natural antisense	NM_005510	DOM3Z	protein Dom3Z	-	31937587	31940032	1562.31	5.15424	9.41084	2.33069
ASHGA5P048529	7.0941	7.0941	2.82662	up	noncoding	BU663707		LincRNAs identified by Khalil et al	654	chr5	-	36446938	36447567		GAGCTGTATTTCCTGTTTTCACCCACTCCTCTTGTACCATCTTTTCATTAACATGAAACT		intergenic							4326.4	298.854	10.8173	7.99065
ASHGA5P058055	3.63217	3.63217	1.86083	up	noncoding	TCONS_00025807	XLOC_012083	LincRNAs identified by Cabili et al	843	chr17	+	4063094	4063996	TCONS_00025805, TCONS_00025806	CTATATCCACGACCCAGCTCCGTACCCCTATAATCCACATGACTCAGCTCCGTACCCCTG		intron sense-overlapping	ENST00000573984	CYB5D2	cytochrome b5 domain containing 2 [Source:HGNC Symbol;Acc:28471]	+	4046995	4090605	18295.3	2379.04	13.1027	11.2419
ASHGA5P007190	2.27342	2.27342	1.18486	up	noncoding	ENST00000329244	WASIR2	GENCODE	1080	chr16	+	72909	75123		AGATGCAGGTTACGGATGACCCACCCAGGAGGGGCCATGGCTTCGAGACACCTGAGGACA		intergenic							16.2509	8.80088	3.78488	2.60002
ASHGA5P008614	4.0315	4.0315	2.01132	up	noncoding	NR_045638	CD6	RefSeq	3177	chr11	+	60739112	60787848		AGGGAGCAATAGCTATCAACCGGTCCCCATCACCATCCCCAAAGAAGGTCCAGGCCCCGC	923	exon sense-overlapping	NM_001254750	CD6	T-cell differentiation antigen CD6 isoform 2 precursor	+	60739112	60787848	61122.6	10058.3	15.3671	13.3558
ASHGA5P008614	4.0315	4.0315	2.01132	up	noncoding	NR_045638	CD6	RefSeq	3177	chr11	+	60739112	60787848		AGGGAGCAATAGCTATCAACCGGTCCCCATCACCATCCCCAAAGAAGGTCCAGGCCCCGC	923	exon sense-overlapping	NM_001254751	CD6	T-cell differentiation antigen CD6 isoform 3 precursor	+	60739112	60787848	61122.6	10058.3	15.3671	13.3558
ASHGA5P008614	4.0315	4.0315	2.01132	up	noncoding	NR_045638	CD6	RefSeq	3177	chr11	+	60739112	60787848		AGGGAGCAATAGCTATCAACCGGTCCCCATCACCATCCCCAAAGAAGGTCCAGGCCCCGC	923	exon sense-overlapping	NM_006725	CD6	T-cell differentiation antigen CD6 isoform 1 precursor	+	60739112	60787848	61122.6	10058.3	15.3671	13.3558
ASHGA5P032222	34.6562	34.6562	5.11504	up	noncoding	ENST00000456090	SMCR2	GENCODE	564	chr17	-	17577339	17581002		AGAGACCCTTGGGCTTCCTTCCTTCAAGGCCTCTGGTCTCTAGCAGAGAGAAGAGAGGGA		intergenic							20848.8	345.684	13.3282	8.21319
ASHGA5P016498	9.52671	9.52671	3.25198	up	noncoding	ENST00000430978	LINC00454	GENCODE	563	chr13	-	114582225	114586528		GTCACTCAAGCACTCATAATCCAGGTTCAGTTTCTGCCAGCACTAATTTGGTTTATTCCA		intergenic							203.054	19.4349	6.96781	3.71583
ASHGA5P039639	111.354	111.354	6.799	up	noncoding	TCONS_00022980	XLOC_010816	LincRNAs identified by Cabili et al	231	chr14	+	46213324	46241659		CTTTCCGGCACAAATCATCACTTCACATATCCCTTCTAGACAGCAGCTGTATGATAGCAT		intergenic							2245.45	12.6331	9.89901	3.1
ASHGA5P027855	11.0452	11.0452	3.46535	up	noncoding	ENST00000542689	RP11-508P1.2	GENCODE	605	chr12	+	15154766	15159617		ACCCACTCCACTTCCTAGGAAATGCCTAGAAATAGAAGGAACTCAGTAAATACTTCCTGG		intergenic							2406.94	119.089	9.97373	6.50838
ASHGA5P058111	2.47518	2.47518	1.30753	up	noncoding	TCONS_00026597	XLOC_012622	LincRNAs identified by Cabili et al	351	chr18	+	8974492	8982663		GCCTAGAAGGATGCCCAATGCCCAGATGGCAACAGCGCCCTCACATGCTATGTACAATTC		intergenic							14.5332	5	3.62878	2.32125
ASHGA5P039063	2.71222	2.71222	1.43948	up	noncoding	ENST00000490153	SLC9A9-AS2	GENCODE	327	chr3	+	143100179	143101003		TCAGATTTTCATCCAGGTCCACGCCAACTCTGTTAAACAAAACCAAAAACTGGTCAATCC		natural antisense	NM_173653	SLC9A9	sodium/hydrogen exchanger 9	-	142984063	143567373	530.25	131.407	8.12007	6.6806
ASHGA5P027168	9.30129	9.30129	3.21743	up	noncoding	NR_038927	DDX11-AS1	RefSeq	2031	chr12	-	31173696	31226781		CTGCTGTGTACACAGGAGAAATAATCACTCCACACCCGACTGAACATTTTCTAACCTTAT	100506660	natural antisense	NM_001257144	DDX11	probable ATP-dependent RNA helicase DDX11 isoform 3	+	31226778	31257725	3815.02	208.237	10.6279	7.4105
ASHGA5P027168	9.30129	9.30129	3.21743	up	noncoding	NR_038927	DDX11-AS1	RefSeq	2031	chr12	-	31173696	31226781		CTGCTGTGTACACAGGAGAAATAATCACTCCACACCCGACTGAACATTTTCTAACCTTAT	100506660	natural antisense	NM_001257145	DDX11	probable ATP-dependent RNA helicase DDX11 isoform 4	+	31226778	31257725	3815.02	208.237	10.6279	7.4105
ASHGA5P027168	9.30129	9.30129	3.21743	up	noncoding	NR_038927	DDX11-AS1	RefSeq	2031	chr12	-	31173696	31226781		CTGCTGTGTACACAGGAGAAATAATCACTCCACACCCGACTGAACATTTTCTAACCTTAT	100506660	natural antisense	NM_004399	DDX11	probable ATP-dependent RNA helicase DDX11 isoform 2	+	31226778	31257725	3815.02	208.237	10.6279	7.4105
ASHGA5P027168	9.30129	9.30129	3.21743	up	noncoding	NR_038927	DDX11-AS1	RefSeq	2031	chr12	-	31173696	31226781		CTGCTGTGTACACAGGAGAAATAATCACTCCACACCCGACTGAACATTTTCTAACCTTAT	100506660	natural antisense	NM_030653	DDX11	probable ATP-dependent RNA helicase DDX11 isoform 1	+	31226778	31257725	3815.02	208.237	10.6279	7.4105
ASHGA5P027168	9.30129	9.30129	3.21743	up	noncoding	NR_038927	DDX11-AS1	RefSeq	2031	chr12	-	31173696	31226781		CTGCTGTGTACACAGGAGAAATAATCACTCCACACCCGACTGAACATTTTCTAACCTTAT	100506660	natural antisense	NM_152438	DDX11	probable ATP-dependent RNA helicase DDX11 isoform 3	+	31226778	31257725	3815.02	208.237	10.6279	7.4105
ASHGA5P027212	368.888	368.888	8.52704	up	noncoding	ENST00000545609	PLEKHA8P1	GENCODE	277	chr12	-	45570209	45609824		GCTAGGTCACCATCATAGTCATGTTTCAGCCTATGGGAAGGGGGAAAGACAATATTCAAG	51054	natural antisense	NM_001025356	ANO6	anoctamin-6 isoform a	+	45609769	45826134	28421.1	58.2332	13.9049	5.3779
ASHGA5P027212	368.888	368.888	8.52704	up	noncoding	ENST00000545609	PLEKHA8P1	GENCODE	277	chr12	-	45570209	45609824		GCTAGGTCACCATCATAGTCATGTTTCAGCCTATGGGAAGGGGGAAAGACAATATTCAAG	51054	natural antisense	NM_001142679	ANO6	anoctamin-6 isoform c	+	45609769	45834187	28421.1	58.2332	13.9049	5.3779
ASHGA5P027212	368.888	368.888	8.52704	up	noncoding	ENST00000545609	PLEKHA8P1	GENCODE	277	chr12	-	45570209	45609824		GCTAGGTCACCATCATAGTCATGTTTCAGCCTATGGGAAGGGGGAAAGACAATATTCAAG	51054	natural antisense	NM_001204803	ANO6	anoctamin-6 isoform d	+	45609769	45826134	28421.1	58.2332	13.9049	5.3779
ASHGA5P038860	55.1317	55.1317	5.78481	up	noncoding	ENST00000474768	ADAMTS9-AS2	GENCODE	2388	chr3	+	64670779	64961211		ACTGAATTTAAAAATGAAATACCTACCACCTACCACTTCAAGCTTTGCTAGGTGACGGCT	100507098	intronic antisense	NM_182920	ADAMTS9	A disintegrin and metalloproteinase with thrombospondin motifs 9 preproprotein	-	64501330	64673365	7131.6	73.4432	11.5262	5.74137
ASHGA5P046381	30.1235	30.1235	4.91282	up	noncoding	ENST00000420160	U82670.4	GENCODE	921	chrX	-	152435329	152439727		GAGATCCTTCTGTCTAGCACTGATGATCTTATTGTATCAGTTACTCCTTCTTCCTTTTGT		intergenic							257.708	5.17876	7.24488	2.33206
ASHGA5P042354	6.56774	6.56774	2.7154	up	noncoding	TCONS_00020869	XLOC_010151	LincRNAs identified by Cabili et al	356	chr12	-	92641530	92662777		ATTTAAAGCAGCTGATCCCAAATACTGGCCCCCACACTAGTTTGGCTCTGTGATCAGATT		intergenic							4749.09	351.762	10.954	8.23856
ASHGA5P037291	19.8295	19.8295	4.30957	up	noncoding	ENST00000436713	RP1-92O14.6	GENCODE	731	chr1	+	43850783	43854826		CTGTTCATCCACTCCTAGAACAGATAGCTAAACCTGTGTGACTCCCATTTAACGTCACAG		natural antisense	NM_052877	MED8	mediator of RNA polymerase II transcription subunit 8 isoform 3	-	43849587	43855483	1642.64	50.6621	9.47031	5.16073
ASHGA5P037291	19.8295	19.8295	4.30957	up	noncoding	ENST00000436713	RP1-92O14.6	GENCODE	731	chr1	+	43850783	43854826		CTGTTCATCCACTCCTAGAACAGATAGCTAAACCTGTGTGACTCCCATTTAACGTCACAG		natural antisense	NM_201542	MED8	mediator of RNA polymerase II transcription subunit 8 isoform 1	-	43850396	43855483	1642.64	50.6621	9.47031	5.16073
ASHGA5P027025	167.015	167.015	7.38383	up	noncoding	ENST00000427893	FAM86FP	GENCODE	829	chr12	-	8386937	8395544	ENST00000338711, ENST00000427587, ENST00000458008, ENST00000459803, ENST00000477247, ENST00000484945, NR_024254	GGACGCCACCCTCTGCCTTGCAGAATGGGCCATCGAGAACCCAGCAGCCTTCACTAACAG		intergenic							34980.1	150.651	14.2645	6.88064
ASHGA5P037541	17.8272	17.8272	4.15601	up	noncoding	ENST00000493696	KCNMB3P1	pseudogene	572	chr22	-	17061815	17063607		AATTGAAGCATTCGGAGAGAAGAATCAACCTGCACTGCCATCCACACAGATATCATGGAC									782.312	31.2536	8.58365	4.42764
ASHGA5P016315	2.06606	2.06606	1.04688	up	noncoding	ENST00000429224	RP11-611D20.2	GENCODE	738	chr9	+	139440663	139443901		ACTGAAATTTGCATAGAAGAGAGTGGCCCATTCGGTGTCCACCCGTCAGGCCACCCAGCA		bidirectional	NM_017617	NOTCH1	neurogenic locus notch homolog protein 1 preproprotein	-	139388895	139440238	60.6959	32.3753	5.52599	4.47911
ASHGA5P041081	2.74192	2.74192	1.45519	up	noncoding	TCONS_00022028	XLOC_010624	LincRNAs identified by Cabili et al	793	chr13	-	53673549	53704701		TAAACACATATTATGCACCTCTTATGTCTTCTTTTTCCTTAAACCTTTCTACCTACTGAC		intergenic							463.218	117.852	7.9467	6.49151
ASHGA5P049100	2.07042	2.07042	1.04992	up	noncoding	ENST00000562852	RP11-143N13.2	GENCODE	799	chr16	+	20592209	20598006		TGTAGTGAAAAAGGAAGAAGAAAAACTACCATGCATTATTTTCTCTCCCTCCCTCCTCAA		intergenic							257.06	97.7305	7.2419	6.19198
ASHGA5P048954	10.0375	10.0375	3.32733	up	noncoding	ENST00000544386	Z97634.5	GENCODE	661	chr16	+	436662	437323	ENST00000457760	TTTTCACAAGATGGCGCTGAAAGCAAAGAAGGAAGCTCCTGCCTCTCCTGAAGCCGAAGC		natural antisense	ENST00000427313	TMEM8A	transmembrane protein 8A [Source:HGNC Symbol;Acc:17205]	-	426805	436999	395.924	31.3354	7.75909	4.43175
ASHGA5P037855	4.34178	4.34178	2.11829	up	noncoding	ENST00000444093	KB-318B8.7	GENCODE	558	chr22	+	24497651	24499317		CCAGTCCTATATTTCCATTGCTTTGCTCTTTCTTGCTTTAAAATAAACAACAAAGGCAAC		intron sense-overlapping	NM_001199281	CABIN1	calcineurin-binding protein cabin-1 isoform a	+	24407819	24574596	42.2945	11.292	5.05951	2.94122
ASHGA5P037855	4.34178	4.34178	2.11829	up	noncoding	ENST00000444093	KB-318B8.7	GENCODE	558	chr22	+	24497651	24499317		CCAGTCCTATATTTCCATTGCTTTGCTCTTTCTTGCTTTAAAATAAACAACAAAGGCAAC		intron sense-overlapping	NM_001201429	CABIN1	calcineurin-binding protein cabin-1 isoform b	+	24407764	24574596	42.2945	11.292	5.05951	2.94122
ASHGA5P037855	4.34178	4.34178	2.11829	up	noncoding	ENST00000444093	KB-318B8.7	GENCODE	558	chr22	+	24497651	24499317		CCAGTCCTATATTTCCATTGCTTTGCTCTTTCTTGCTTTAAAATAAACAACAAAGGCAAC		intron sense-overlapping	NM_012295	CABIN1	calcineurin-binding protein cabin-1 isoform a	+	24407764	24574596	42.2945	11.292	5.05951	2.94122
ASHGA5P014844	21.067	21.067	4.39692	up	noncoding	NR_033979	HOXD-AS1	RefSeq	3819	chr2	-	177037923	177053686		CGTACTCCAGATCTGGGGACCCTTCACCTGCCTCTACTACTGCAAATGATTGGATATTCG	401022	natural antisense	NM_024501	HOXD1	homeobox protein Hox-D1	+	177053306	177055635	6797.3	167.73	11.4638	7.06692
ASHGA5P021263	2.64435	2.64435	1.40291	up	noncoding	ENST00000528982	AP006621.8	GENCODE	464	chr11	-	823655	824645		GCATCACCAGGTGCGCACCCTCATTGAGCCGGGCGGGCAGGTGCTCCAGGATGTGATCTT		natural antisense	NM_020376	PNPLA2	patatin-like phospholipase domain-containing protein 2	+	818900	825571	54.7432	23.3498	5.38573	3.98282
ASHGA5P019872	2.27329	2.27329	1.18478	up	noncoding	ENST00000504429	RP11-471J12.1	GENCODE	749	chr4	+	174452695	174458510		GGAAGGCGAGAAGGCACAGATCATTCATGGGGATGTATAACCGAAACCAGTCCTCTCCAC		intergenic							14.3012	6.6981	3.6079	2.42311
ASHGA5P020358	84.62	84.62	6.40293	up	noncoding	ENST00000512210	RP11-133F8.2	GENCODE	511	chr5	-	91745962	91975204		AATTCTTTTTATCTGAAACGAAGCCAAGCAAAGCAACATCACCTTCTGGAAAGTGCAGAA		intergenic							882.147	5	8.72418	2.32125
ASHGA5P020318	3.00907	3.00907	1.58932	up	noncoding	ENST00000511488	FAM86EP	GENCODE	1209	chr4	-	3944493	3957121	NR_024253	GCAGAGGCCGGCCAGGCCAGGATCAGATGGGAAGTGGAAGCTTGTCATGACCAGAAACTG		intergenic							17.7101	5	3.91057	2.32125
ASHGA5P013840	2.47222	2.47222	1.30581	up	noncoding	NR_026966	LOC100130691	RefSeq	5223	chr2	-	178148235	178257419		TCCTGCACGTCTGATACAGCCAAACTCCACGCCACCTGGTTTGCTCAACAGCAAAAGACA	100130691	natural antisense	ENST00000264167	AGPS	alkylglycerone phosphate synthase [Source:HGNC Symbol;Acc:327]	+	178257371	178408564	288.364	91.0287	7.38012	6.07431
ASHGA5P056960	282.892	282.892	8.14411	up	noncoding	TCONS_00011248	XLOC_005939	LincRNAs identified by Cabili et al	4156	chr6	-	169819100	169825251		GGAATTCTTTTCCTTTCTTTCCCTAACGAAGGAGATATAAGTGACAGCCACCTGGTGGTC		intergenic							37935.4	103.072	14.4203	6.27619
ASHGA5P025790	63.5679	63.5679	5.99023	up	noncoding	NR_037775	MIA-RAB4B	RefSeq	1394	chr19	+	41281441	41302849		AAAGTCGATGTGAAGACAGACACTTCCTCTTCAAATTCCTGGTGATTGGCAGTGCAGGAA	100529262	exon sense-overlapping	NM_001202553	MIA	melanoma-derived growth regulatory protein precursor	+	41281081	41283398	1617.82	16.3494	9.4517	3.46148
ASHGA5P025790	63.5679	63.5679	5.99023	up	noncoding	NR_037775	MIA-RAB4B	RefSeq	1394	chr19	+	41281441	41302849		AAAGTCGATGTGAAGACAGACACTTCCTCTTCAAATTCCTGGTGATTGGCAGTGCAGGAA	100529262	exon sense-overlapping	NM_006533	MIA	melanoma-derived growth regulatory protein precursor	+	41281281	41283398	1617.82	16.3494	9.4517	3.46148
ASHGA5P025790	63.5679	63.5679	5.99023	up	noncoding	NR_037775	MIA-RAB4B	RefSeq	1394	chr19	+	41281441	41302849		AAAGTCGATGTGAAGACAGACACTTCCTCTTCAAATTCCTGGTGATTGGCAGTGCAGGAA	100529262	exon sense-overlapping	NM_016154	RAB4B	ras-related protein Rab-4B	+	41284123	41302849	1617.82	16.3494	9.4517	3.46148
ASHGA5P045479	2.07704	2.07704	1.05453	up	noncoding	ENST00000453199	RP13-225O21.2	GENCODE	397	chr9	-	129976313	129984186		AAACCACTGCTAATCCGGTCCAGACTGTTGAGGGAGGAAGAAACTCAAATGGTATCCAAA		intronic antisense	NM_001190728	RALGPS1	ras-specific guanine nucleotide-releasing factor RalGPS1 isoform 3	+	129724503	129979724	13.9912	7.95309	3.57613	2.5216
ASHGA5P045479	2.07704	2.07704	1.05453	up	noncoding	ENST00000453199	RP13-225O21.2	GENCODE	397	chr9	-	129976313	129984186		AAACCACTGCTAATCCGGTCCAGACTGTTGAGGGAGGAAGAAACTCAAATGGTATCCAAA		intronic antisense	NM_001190729	RALGPS1	ras-specific guanine nucleotide-releasing factor RalGPS1 isoform 2	+	129677052	129979724	13.9912	7.95309	3.57613	2.5216
ASHGA5P045479	2.07704	2.07704	1.05453	up	noncoding	ENST00000453199	RP13-225O21.2	GENCODE	397	chr9	-	129976313	129984186		AAACCACTGCTAATCCGGTCCAGACTGTTGAGGGAGGAAGAAACTCAAATGGTATCCAAA		natural antisense	NM_014636	RALGPS1	ras-specific guanine nucleotide-releasing factor RalGPS1 isoform 1	+	129677052	129985445	13.9912	7.95309	3.57613	2.5216
ASHGA5P027508	2.32392	2.32392	1.21656	up	noncoding	ENST00000547515	RP11-541G9.2	GENCODE	576	chr12	-	97666469	97669987		AAGACATCTGTTCCTCTCATCCTTTAGTGAAGTGCAGATGGAGATTCCTACATGGTTTTG		intergenic							46.7737	23.0856	5.18518	3.96861
ASHGA5P055588	3.25008	3.25008	1.70048	up	noncoding	ENST00000397112	GOLGA2B	GENCODE	2632	chr12	-	100550189	100567437	ENST00000548404	GCCTGACCATGCCTCCTTTCCCTTTCAGCTTTCTCATAGACCAATGGGCTTGGAGCATTA		intergenic							12252.2	1664.26	12.4006	10.7001
ASHGA5P033484	4.98274	4.98274	2.31694	up	noncoding	ENST00000442410	RP11-544D21.1	GENCODE	448	chr1	-	239433024	239461237		GGAAGTGTTCCTGGTTTGGCAGTATATGACATTAAGGTTTAAAAGTCAGTGTTTTCATTT		intergenic							30.4356	5	4.63819	2.32125
ASHGA5P044992	649.132	649.132	9.34237	up	noncoding	ENST00000458107	RP11-3G20.2	GENCODE	339	chr8	+	122691365	122719871		CATTCAATGTAAAAATAATCTGAGTAAAACCATCATCTAGTCCCTTTCCTTTGAGACCCA		intergenic							20993.9	23.6047	13.3393	3.99695
ASHGA5P058631	3.6865	3.6865	1.88225	up	noncoding	uc011hzv.2	HLA-DQB	UCSC_knowngene	645	chr6_mcf_hap5	-	3961838	3964231		GTGGAGTGGCGGCTCCTGCACTGACTCCTGAGACTATTTTAACTGGGATTGGTTATCACT		intergenic							78.2331	22.7309	5.8301	3.94785
ASHGA5P042342	14.2913	14.2913	3.83706	up	noncoding	ENST00000440874	TRIM31-AS1	GENCODE	549	chr6	+	30073016	30082501		TAGAGACACTACTAATTGTTCCAGCTCATCCAGCTAATAAATGACAGATCTCAGACTTAA		natural antisense	NM_007028	TRIM31	E3 ubiquitin-protein ligase TRIM31	-	30070673	30080867	312.332	18.4269	7.47433	3.63727
ASHGA5P037138	26.5502	26.5502	4.73065	up	noncoding	ENST00000530479	RP11-261P9.4	GENCODE	577	chr20	+	57285850	57286689		TCATGCTGTCATTTATTCGTTGTTCCTAAACACCCACTTCTCCCTGGAATGACCACAGGA		intron sense-overlapping	NM_001204872	NPEPL1	probable aminopeptidase NPEPL1 isoform 2	+	57264186	57290900	1841.98	42.8992	9.63812	4.90747
ASHGA5P037138	26.5502	26.5502	4.73065	up	noncoding	ENST00000530479	RP11-261P9.4	GENCODE	577	chr20	+	57285850	57286689		TCATGCTGTCATTTATTCGTTGTTCCTAAACACCCACTTCTCCCTGGAATGACCACAGGA		intron sense-overlapping	NM_001204873	NPEPL1	probable aminopeptidase NPEPL1 isoform 3	+	57264186	57290900	1841.98	42.8992	9.63812	4.90747
ASHGA5P037138	26.5502	26.5502	4.73065	up	noncoding	ENST00000530479	RP11-261P9.4	GENCODE	577	chr20	+	57285850	57286689		TCATGCTGTCATTTATTCGTTGTTCCTAAACACCCACTTCTCCCTGGAATGACCACAGGA		intron sense-overlapping	NM_024663	NPEPL1	probable aminopeptidase NPEPL1 isoform 1	+	57267861	57290900	1841.98	42.8992	9.63812	4.90747
ASHGA5P036800	7.49954	7.49954	2.9068	up	noncoding	ENST00000452971	RP11-329N22.1	GENCODE	790	chr1	+	38940867	38942156		CTCTCTTCTTCCAACCAGCCAATATTTTTTGTCTTTCTAGAAAACCTGTCTTGTTCAAAG		intergenic							8501.77	527.423	11.8084	8.90161
ASHGA5P037616	11.3103	11.3103	3.49956	up	noncoding	ENST00000485225	GSTTP2	pseudogene	2070	chr22	-	24385937	24401899		CACACACTCTCACTTTTATCTTGTTTCTATAAATTAATAAATACAGCCTTTGTGAGTTGG	653399								2090.75	104.574	9.80301	6.30345
ASHGA5P038411	14.0484	14.0484	3.81233	up	noncoding	uc003emd.1	RPL32P3	UCSC_knowngene	2836	chr3	-	129109997	129118282		GAGTTAAGAGCATTATAATTCCCTTTATCACCATATAAACATGTCACTTATCCGGAAAGC	132241	intergenic							113.981	7.22786	6.27863	2.4663
ASHGA5P038703	5.55962	5.55962	2.47499	up	noncoding	TCONS_00023378	XLOC_011223	LincRNAs identified by Cabili et al	968	chr15	+	41198764	41200046		TGCTTGGGCAGCTGGAGCCCTCAGCTTTCTCCTCCACCTGGAGCATGGAGATGATATTCA		intergenic							149.36	25.5575	6.59625	4.12127
ASHGA5P033203	33.1361	33.1361	5.05033	up	noncoding	ENST00000515692	RP11-304F15.4	GENCODE	1816	chr17	+	47964960	47978257		AGACCGTTTCTCCTGAGCTCTTTTCTCTGAGACATCACCATAGATGGCTATGAGTCAAGT		intergenic							1516.94	29.3317	9.37931	4.32897
ASHGA5P056778	4.36033	4.36033	2.12444	up	noncoding	TCONS_00008575	XLOC_004069	LincRNAs identified by Cabili et al	295	chr4	-	128540064	128545185		TAAGGGACAGCTTCGCTTAATCTTTCTTTCTCTTCTTCCTAAGCCATGTGAAGACCTTGC		intronic antisense	ENST00000504491	INTU	inturned planar cell polarity effector homolog (Drosophila) [Source:HGNC Symbol;Acc:29239]	+	128544425	128565191	47174.9	6512.05	14.8794	12.755
ASHGA5P053167	2.20501	2.20501	1.14079	up	noncoding	NR_015381	TP53TG1	RefSeq	751	chr7	-	86954663	86974808		GCGATGGTTAAGACCCATTTTCACCCAACTTCTCGCCGCAGGTCTGGCTTACCACACGCT	11257	bidirectional	NM_001143935	CROT	peroxisomal carnitine O-octanoyltransferase isoform 1	+	86974950	87029112	33.0055	17.9772	4.74328	3.60249
ASHGA5P053167	2.20501	2.20501	1.14079	up	noncoding	NR_015381	TP53TG1	RefSeq	751	chr7	-	86954663	86974808		GCGATGGTTAAGACCCATTTTCACCCAACTTCTCGCCGCAGGTCTGGCTTACCACACGCT	11257	bidirectional	NM_001243745	CROT	peroxisomal carnitine O-octanoyltransferase isoform 3	+	86974950	86989425	33.0055	17.9772	4.74328	3.60249
ASHGA5P053167	2.20501	2.20501	1.14079	up	noncoding	NR_015381	TP53TG1	RefSeq	751	chr7	-	86954663	86974808		GCGATGGTTAAGACCCATTTTCACCCAACTTCTCGCCGCAGGTCTGGCTTACCACACGCT	11257	bidirectional	NM_021151	CROT	peroxisomal carnitine O-octanoyltransferase isoform 2	+	86974950	87029112	33.0055	17.9772	4.74328	3.60249
ASHGA5P037587	88.4408	88.4408	6.46664	up	noncoding	ENST00000447720	LINC00281	GENCODE	3215	chr22	-	21655278	21679331	ENST00000436681, ENST00000440673, ENST00000451257	CACCGTACACGACATCACTAACGAGGACGCCACACACGACATCGCTAACGAGGATACTGT	26080	intergenic							18871.7	131.258	13.1452	6.67859
ASHGA5P050347	4.19402	4.19402	2.06833	up	noncoding	ENST00000467807	ZNF542	GENCODE	3209	chr19	+	56879467	56890897		CCACGGCCGAACTCACGCCTACGTACTCAGTCACCAGCGGAACCCTCTCCACCAGGCTCC	147947	intergenic							4753.19	523.935	10.9574	8.8891
ASHGA5P044632	2.54521	2.54521	1.34779	up	noncoding	uc003wrb.1	BC030294	UCSC_knowngene	707	chr8	+	7010238	7044422	ENST00000519726, NR_040091, NR_040092, uc003gho.3	CATCTTCATCGTTTCATTACCACCATCCAACACTATCGGGGGACCTGCCCTGATAATCAG		intergenic							67784.6	18575.9	15.551	14.2033
ASHGA5P029515	2.04023	2.04023	1.02873	up	noncoding	AA593434		LincRNAs identified by Khalil et al	342	chr1	-	99336000	99336342		ACAGAAAGTGGCCACTGTTTACAGCCATTGGTCACTCTCCAACCCAACAACTCATTTATT		intergenic							463.716	154.318	7.94763	6.9189
ASHGA5P056342	6.27363	6.27363	2.6493	up	noncoding	TCONS_00003583	XLOC_001358	LincRNAs identified by Cabili et al	1795	chr2	+	13440810	13471719		TCATTTAAAATTCCATCCATTGAAGTCTGAGTTCCGTGAGAAACAGAATCAGAACTCTTG		intergenic							6801.8	500.964	11.4644	8.81508
ASHGA5P019755	79.4605	79.4605	6.31217	up	noncoding	ENST00000502645	CTD-2337A12.1	GENCODE	539	chr5	+	95297704	95970220		CCATTCACAGGAGCCTTCCTTTCTTAAAGACTCAATTATACAACATTCTTTCTACACTTA		intronic antisense	NM_000439	PCSK1	neuroendocrine convertase 1 isoform 1 preproprotein	-	95726039	95768985	1309.17	10.7644	9.18568	2.87352
ASHGA5P019755	79.4605	79.4605	6.31217	up	noncoding	ENST00000502645	CTD-2337A12.1	GENCODE	539	chr5	+	95297704	95970220		CCATTCACAGGAGCCTTCCTTTCTTAAAGACTCAATTATACAACATTCTTTCTACACTTA		intronic antisense	NM_001177875	PCSK1	neuroendocrine convertase 1 isoform 2	-	95726039	95767863	1309.17	10.7644	9.18568	2.87352
ASHGA5P019755	79.4605	79.4605	6.31217	up	noncoding	ENST00000502645	CTD-2337A12.1	GENCODE	539	chr5	+	95297704	95970220		CCATTCACAGGAGCCTTCCTTTCTTAAAGACTCAATTATACAACATTCTTTCTACACTTA		intronic antisense	NM_001177876	PCSK1	neuroendocrine convertase 1 isoform 3	-	95726039	95748689	1309.17	10.7644	9.18568	2.87352
ASHGA5P019755	79.4605	79.4605	6.31217	up	noncoding	ENST00000502645	CTD-2337A12.1	GENCODE	539	chr5	+	95297704	95970220		CCATTCACAGGAGCCTTCCTTTCTTAAAGACTCAATTATACAACATTCTTTCTACACTTA		natural antisense	NM_012081	ELL2	RNA polymerase II elongation factor ELL2	-	95220801	95297775	1309.17	10.7644	9.18568	2.87352
ASHGA5P049122	2.91345	2.91345	1.54273	up	noncoding	ENST00000562842	CTD-2270L9.4	GENCODE	438	chr16	+	23464327	23468927		AATAATTGTCCATTTCATCCAAGTTGTATAATTTGTTGGCATAAAATTGTTCAAAGGATC		natural antisense	NM_153603	COG7	conserved oligomeric Golgi complex subunit 7	-	23399813	23464512	17.2205	5	3.86398	2.32125
ASHGA5P037407	22.9112	22.9112	4.51798	up	noncoding	ENST00000421604	AP001255.2	GENCODE	762	chr21	+	24437812	24503528		ATTCTGCTGACACTCACTCTGGAGGAATAAAACTTTAGAGCCCCTGGCTAAACAGGATCT		intergenic							15503.5	370.442	12.8352	8.31725
ASHGA5P020730	22.8767	22.8767	4.51581	up	noncoding	ENST00000519034	RP11-347C18.3	GENCODE	449	chr8	+	95962452	95963624		CAGAACCAAGCTTCTGCTTTGTACTCTGGAAAATGCCAGCCACCCATGAGGAGAGACCAC		intron sense-overlapping	ENST00000396111	NDUFAF6	NADH dehydrogenase (ubiquinone) complex I, assembly factor 6 [Source:HGNC Symbol;Acc:28625]	+	95908043	96070938	1364.28	37.9856	9.23828	4.72247
ASHGA5P020730	22.8767	22.8767	4.51581	up	noncoding	ENST00000519034	RP11-347C18.3	GENCODE	449	chr8	+	95962452	95963624		CAGAACCAAGCTTCTGCTTTGTACTCTGGAAAATGCCAGCCACCCATGAGGAGAGACCAC		intron sense-overlapping	ENST00000396113	NDUFAF6	NADH dehydrogenase (ubiquinone) complex I, assembly factor 6 [Source:HGNC Symbol;Acc:28625]	+	95908040	96070938	1364.28	37.9856	9.23828	4.72247
ASHGA5P020730	22.8767	22.8767	4.51581	up	noncoding	ENST00000519034	RP11-347C18.3	GENCODE	449	chr8	+	95962452	95963624		CAGAACCAAGCTTCTGCTTTGTACTCTGGAAAATGCCAGCCACCCATGAGGAGAGACCAC		intron sense-overlapping	ENST00000519136	NDUFAF6	NADH dehydrogenase (ubiquinone) complex I, assembly factor 6 [Source:HGNC Symbol;Acc:28625]	+	95908064	96059259	1364.28	37.9856	9.23828	4.72247
ASHGA5P020730	22.8767	22.8767	4.51581	up	noncoding	ENST00000519034	RP11-347C18.3	GENCODE	449	chr8	+	95962452	95963624		CAGAACCAAGCTTCTGCTTTGTACTCTGGAAAATGCCAGCCACCCATGAGGAGAGACCAC		intron sense-overlapping	ENST00000523378	NDUFAF6	NADH dehydrogenase (ubiquinone) complex I, assembly factor 6 [Source:HGNC Symbol;Acc:28625]	+	95907994	96059318	1364.28	37.9856	9.23828	4.72247
ASHGA5P038620	46.6983	46.6983	5.5453	up	noncoding	ENST00000414895	RP11-143P4.2	GENCODE	526	chr3	-	192862252	192894653		GAGCAAAGAATTAAGAGATGACTTATATTTGAAAAACCACCCACAGCTGCATGTTGATGT		intergenic							674.372	10.6892	8.40963	2.86433
ASHGA5P035337	29.1926	29.1926	4.86753	up	noncoding	TCONS_00004443	XLOC_002317	LincRNAs identified by Cabili et al	4164	chr2	-	130324222	130351825		TTCCAGCATCCTCAGAGCTTCAAGGCAAGTACAGCTGTTCTAAGTAATTTTCATCATTTC		intergenic							904.151	21.6897	8.7499	3.88237
ASHGA5P034342	2.01639	2.01639	1.01177	up	noncoding	uc002qim.1	AL833150	UCSC_knowngene	1567	chr19	-	55551815	55553382		ATCAACACCCTGATAGTTCTCATTTTAACCACCTGTAAGTGCACATACAAGTCAACGGCA		intergenic							48.5245	27.3782	5.23493	4.22316
ASHGA5P035128	2.16663	2.16663	1.11545	up	noncoding	ENST00000430876	AC008067.2	GENCODE	359	chr2	-	80802237	80843663		CCCCACCTCTGCTTCAAATATAATAGCAATAAATGTGCTTTTGCATATGCAGTATATTTG		intronic antisense	NM_001164883	CTNNA2	catenin alpha-2 isoform 2	+	79740059	80875988	2286.11	499.71	9.92429	8.80884
ASHGA5P035128	2.16663	2.16663	1.11545	up	noncoding	ENST00000430876	AC008067.2	GENCODE	359	chr2	-	80802237	80843663		CCCCACCTCTGCTTCAAATATAATAGCAATAAATGTGCTTTTGCATATGCAGTATATTTG		intronic antisense	NM_004389	CTNNA2	catenin alpha-2 isoform 1	+	79740059	80875988	2286.11	499.71	9.92429	8.80884
ASHGA5P037110	2.03695	2.03695	1.02641	up	noncoding	ENST00000437987	RP4-715N11.2	GENCODE	182	chr20	+	51297966	51307119	ENST00000413070, ENST00000425279, ENST00000448013	GCAGCCGACCAACGCTTCTGAAACTATTGTTTTTGGCAAATGTTCCTCAACATTTTCCTG		intergenic							18.5402	11.3211	3.97212	2.9457
ASHGA5P034740	7.94783	7.94783	2.99056	up	noncoding	ENST00000572160	LINC00085	GENCODE	759	chr19	+	52205788	52208428		GCATCGGGCAAGGGTTCTTCCCATGACTGTAAGGTAGTGATGTTTCCTCTTCCTCCACAG	147650	intergenic							3271.03	208.125	10.4006	7.41002
ASHGA5P023357	2.2086	2.2086	1.14314	up	noncoding	ENST00000579201	RP11-156L14.1	GENCODE	586	chr17	+	60783693	60813895		AACTGCATCTTGAGACCCAGACACATGCAAATGGCCTTCTGAGTTCATTCTTGATGGAGA		natural antisense	NM_001100875	MARCH10	probable E3 ubiquitin-protein ligase MARCH10	-	60778674	60884011	123.362	52.9188	6.37043	5.22729
ASHGA5P023357	2.2086	2.2086	1.14314	up	noncoding	ENST00000579201	RP11-156L14.1	GENCODE	586	chr17	+	60783693	60813895		AACTGCATCTTGAGACCCAGACACATGCAAATGGCCTTCTGAGTTCATTCTTGATGGAGA		natural antisense	NM_152598	MARCH10	probable E3 ubiquitin-protein ligase MARCH10	-	60778674	60885705	123.362	52.9188	6.37043	5.22729
ASHGA5P033552	69.2912	69.2912	6.1146	up	noncoding	ENST00000581648	RP11-178F10.3	GENCODE	543	chr18	-	22096846	22097970		CTCCCTGAGGGCTGTTCTGCCAACCTCACGACACCATCATAGAAGACTTCAGAGACTGAC		intergenic							11344.1	95.5352	12.2705	6.15588
ASHGA5P005139	20.4697	20.4697	4.35542	up	noncoding	NR_027254	LOC388387	RefSeq	1844	chr17	-	41026690	41050751	uc002iby.2	CACATACTGGACGGGGTTTCACCATCTGCTGGGACGGGACACCCTCTCTTCTTGATCTCA	388387	intergenic							766.856	26.9696	8.55684	4.20142
ASHGA5P030797	2.57952	2.57952	1.3671	up	noncoding	ENST00000528696	CTD-3076O17.1	GENCODE	572	chr15	+	100510419	100514215		TTTACACTCCACGCACGAGACTTCCAAGGCAACACCTAGGATTTAGAGACTATGTTCTCA		natural antisense	NM_139057	ADAMTS17	A disintegrin and metalloproteinase with thrombospondin motifs 17 preproprotein	-	100511642	100882183	105.896	40.6369	6.19006	4.82296
ASHGA5P040895	17.1985	17.1985	4.10421	up	noncoding	ENST00000510850	RP11-844P9.2	GENCODE	548	chr5	-	175607009	175612159		TTTGGTATAAAAAACACTGAGTCCAGTAAAGAACTGTGACCATCCACTCGAGTCCGGGGA		intergenic							1130.62	42.6428	9.00269	4.89847
ASHGA5P045306	8.45198	8.45198	3.07929	up	noncoding	NR_027471	LOC440173	RefSeq	2018	chr9	-	89623365	89657041		CCAACACCTCCACAAACAAATGGGAGCTTAATAGACTTTGCAAAATTACTTTTTATCCAG	440173	intergenic							55.3174	5	5.40054	2.32125
ASHGA5P031868	2.49362	2.49362	1.31824	up	noncoding	ENST00000572067	CTC-479C5.10	GENCODE	3907	chr16	+	67916363	67920270		GACAAGCAGACATTCCATCCTGATATTTGCTATAAACACTGCTGCTTTTTTCTCCTCCAG		exon sense-overlapping	NM_014329	EDC4	enhancer of mRNA-decapping protein 4	+	67906925	67918417	973.25	222.915	8.83142	7.51317
ASHGA5P031868	2.49362	2.49362	1.31824	up	noncoding	ENST00000572067	CTC-479C5.10	GENCODE	3907	chr16	+	67916363	67920270		GACAAGCAGACATTCCATCCTGATATTTGCTATAAACACTGCTGCTTTTTTCTCCTCCAG		exon sense-overlapping	NM_198443	NRN1L	neuritin-like protein precursor	+	67918780	67920271	973.25	222.915	8.83142	7.51317
ASHGA5P057382	2.84982	2.84982	1.51087	up	noncoding	TCONS_00016530	XLOC_007264	LincRNAs identified by Cabili et al	228	chr9	+	1633517	1929562		TCTTCAGGACCTGAAAATCGTCCTTGCATGGGAAGACAAACTAAAGCCCACATCACTGAA		intergenic							16.8042	5	3.83212	2.32125
ASHGA5P015576	3.19237	3.19237	1.67463	up	noncoding	ENST00000421594	RP1-3J17.3	GENCODE	554	chr6	+	86340106	86340841		TACCACACAATTACATAAGAATATTAGAGAGCACTGGTCAGCAAGTCAGGTTATTTATCC		intronic antisense	NM_001159673	SYNCRIP	heterogeneous nuclear ribonucleoprotein Q isoform 2	-	86317501	86352640	18.8855	5	3.99588	2.32125
ASHGA5P015576	3.19237	3.19237	1.67463	up	noncoding	ENST00000421594	RP1-3J17.3	GENCODE	554	chr6	+	86340106	86340841		TACCACACAATTACATAAGAATATTAGAGAGCACTGGTCAGCAAGTCAGGTTATTTATCC		intronic antisense	NM_001159674	SYNCRIP	heterogeneous nuclear ribonucleoprotein Q isoform 3	-	86317501	86352608	18.8855	5	3.99588	2.32125
ASHGA5P015576	3.19237	3.19237	1.67463	up	noncoding	ENST00000421594	RP1-3J17.3	GENCODE	554	chr6	+	86340106	86340841		TACCACACAATTACATAAGAATATTAGAGAGCACTGGTCAGCAAGTCAGGTTATTTATCC		intronic antisense	NM_001159675	SYNCRIP	heterogeneous nuclear ribonucleoprotein Q isoform 4	-	86323692	86351169	18.8855	5	3.99588	2.32125
ASHGA5P015576	3.19237	3.19237	1.67463	up	noncoding	ENST00000421594	RP1-3J17.3	GENCODE	554	chr6	+	86340106	86340841		TACCACACAATTACATAAGAATATTAGAGAGCACTGGTCAGCAAGTCAGGTTATTTATCC		intronic antisense	NM_001159676	SYNCRIP	heterogeneous nuclear ribonucleoprotein Q isoform 5	-	86317501	86351169	18.8855	5	3.99588	2.32125
ASHGA5P015576	3.19237	3.19237	1.67463	up	noncoding	ENST00000421594	RP1-3J17.3	GENCODE	554	chr6	+	86340106	86340841		TACCACACAATTACATAAGAATATTAGAGAGCACTGGTCAGCAAGTCAGGTTATTTATCC		intronic antisense	NM_001159677	SYNCRIP	heterogeneous nuclear ribonucleoprotein Q isoform 6	-	86317501	86353043	18.8855	5	3.99588	2.32125
ASHGA5P015576	3.19237	3.19237	1.67463	up	noncoding	ENST00000421594	RP1-3J17.3	GENCODE	554	chr6	+	86340106	86340841		TACCACACAATTACATAAGAATATTAGAGAGCACTGGTCAGCAAGTCAGGTTATTTATCC		intronic antisense	NM_001253771	SYNCRIP	heterogeneous nuclear ribonucleoprotein Q isoform 7	-	86317501	86352608	18.8855	5	3.99588	2.32125
ASHGA5P015576	3.19237	3.19237	1.67463	up	noncoding	ENST00000421594	RP1-3J17.3	GENCODE	554	chr6	+	86340106	86340841		TACCACACAATTACATAAGAATATTAGAGAGCACTGGTCAGCAAGTCAGGTTATTTATCC		intronic antisense	NM_006372	SYNCRIP	heterogeneous nuclear ribonucleoprotein Q isoform 1	-	86323692	86353043	18.8855	5	3.99588	2.32125
ASHGA5P045430	328.131	328.131	8.35813	up	noncoding	ENST00000428504	RP11-206L10.2	GENCODE	1317	chr1	-	700236	714006	ENST00000447412, uc003idd.3	GAAAAATTCAGACCCAGCACAGTGTTTATGTTGGTCAAAAATAGAAAACTATGTCTGGCG		intergenic							3961.11	5	10.6794	2.32125
ASHGA5P036367	3.27153	3.27153	1.70996	up	noncoding	TCONS_00026319	XLOC_012658	LincRNAs identified by Cabili et al	256	chr18	+	32902394	32906945		ATTTTCTGCTCTTACGATGCTGATGATTGTCTAAGATTGCACCATCCACCCTGGAGGTTG		intergenic							5212.74	707.828	11.0829	9.3729
ASHGA5P046130	2.34163	2.34163	1.22751	up	noncoding	NR_024440	LOC729609	RefSeq	628	chrX	-	20004934	20007897		TTCTACTTTAGATCCCTAATGCCAGGCAAATAGTCCCTCCTTATTAAGAATAAATGTACT	729609	intergenic							28.7633	14.9791	4.56357	3.33606
ASHGA5P033228	2.75679	2.75679	1.46299	up	noncoding	ENST00000416221	RP11-295G20.2	GENCODE	465	chr1	-	231658133	231664302		GGAATAGCTTGTTATGCAACAATACATAATTAATACACTGGTCTCCCACTTTCAAGTTTG		natural antisense	ENST00000366639	TSNAX	translin-associated factor X [Source:HGNC Symbol;Acc:12380]	+	231664286	231702270	154.544	51.1724	6.63994	5.17695
ASHGA5P036141	3.67686	3.67686	1.87847	up	noncoding	ENST00000424716	AC068137.1	pseudogene	533	chr2	+	130893550	130895332		TCTTCAACCATTCCCTGTACCGCATATTCATGCCAACCATGATTGCCATCCACAGCCCAC									88.2617	25.126	5.97114	4.09267
ASHGA5P029492	7.14149	7.14149	2.83623	up	noncoding	ENST00000549515	RP11-260G13.1	GENCODE	647	chr14	+	29859551	29905618		CCGTGAAGAAAAAGATCTTTCTCCCTTCTGTACTCTGAATAAATAAATTAGTCTGACCAA		intergenic							1653.83	128.782	9.4811	6.64487
ASHGA5P045954	650.576	650.576	9.34557	up	noncoding	ENST00000566531	RP11-355O1.11	GENCODE	914	chr9	+	125701698	125702612		GACTCACTCACCAGGAAAAGAGCATATGCCAGTTGGAATAAATAAAGGGGAAGAGTAAGG		intergenic							30092.9	36.6133	14.0121	4.66652
ASHGA5P047217	11.165	11.165	3.48091	up	noncoding	ENST00000436340	RP11-195B3.1	GENCODE	463	chr10	+	3308194	3309207		ATATGAGGAACTTAGCAAATGGACTCATTCTTCATTTTCTTCTTCCTCTCTCTCCTGATT		intergenic							27156.4	1326.92	13.8091	10.3282
ASHGA5P025768	6.87448	6.87448	2.78125	up	noncoding	NR_034098	EML2	RefSeq	1995	chr19	-	46112657	46142675		TTATCTTCAGTGTGGCTTGGCCATCCACCCAGATATGGTCACCATCGCCACGGGACAGGT	24139	exon sense-overlapping	NM_001193268	EML2	echinoderm microtubule-associated protein-like 2 isoform 1	-	46112657	46148775	11885.4	797.171	12.3575	9.57621
ASHGA5P025768	6.87448	6.87448	2.78125	up	noncoding	NR_034098	EML2	RefSeq	1995	chr19	-	46112657	46142675		TTATCTTCAGTGTGGCTTGGCCATCCACCCAGATATGGTCACCATCGCCACGGGACAGGT	24139	exon sense-overlapping	NM_001193269	EML2	echinoderm microtubule-associated protein-like 2 isoform 3	-	46112657	46146985	11885.4	797.171	12.3575	9.57621
ASHGA5P025768	6.87448	6.87448	2.78125	up	noncoding	NR_034098	EML2	RefSeq	1995	chr19	-	46112657	46142675		TTATCTTCAGTGTGGCTTGGCCATCCACCCAGATATGGTCACCATCGCCACGGGACAGGT	24139	exon sense-overlapping	NM_012155	EML2	echinoderm microtubule-associated protein-like 2 isoform 2	-	46112657	46142675	11885.4	797.171	12.3575	9.57621
ASHGA5P049641	15.9298	15.9298	3.99366	up	noncoding	ENST00000582968	AC124789.1	GENCODE	482	chr17	-	36606831	36608688		ATAAGGGTTGGGCCTTTTTGAGGCAGCTACCAGAAGGGAGCACCAAGCAGATGCAGCTCC		intronic antisense	NM_001199417	ARHGAP23	rho GTPase-activating protein 23	+	36584719	36668628	117.481	5	6.31491	2.32125
ASHGA5P033621	15.1841	15.1841	3.92449	up	noncoding	NR_048536	LINC-ROR	RefSeq	2591	chr18	-	54721803	54739350		TTGCTTGAATATCTGAAGTTGTGGACTCAATCTCATACCTGCTCCACTTATGAGTTATAG	100885779	intergenic							620.012	30.6627	8.31954	4.39505
ASHGA5P019720	37.888	37.888	5.24367	up	noncoding	uc010jlj.3	LOC729678	UCSC_knowngene	2869	chr5	+	180256958	180262726		GAGGCCTCAGGCACGTCCTCGACCTCAGTTGCCACGTGCACATGCTGGTGCCTTCCAGGT	729678	intergenic							419.141	8.65705	7.8263	2.58263
ASHGA5P058368	5.27915	5.27915	2.4003	up	noncoding	uc002bnv.2	LOC254559	UCSC_knowngene	4113	chr15	+	89911329	89941718	ENST00000561327	CCCCGACCAGTTACTCCCCTGCTGGTGCCTCCCTCCTTGGCGCGCTTCCCACCTGCGATC	254559	intergenic							43344.2	4731.13	14.6631	12.2628
ASHGA5P019061	10.366	10.366	3.37378	up	noncoding	ENST00000466668	GUSBP2	GENCODE	817	chr6	-	26851120	26924271	ENST00000487022, ENST00000512782, NR_027386, NR_029426, NR_034021, uc003jxc.4, uc003jxo.3, uc003jxp.3, uc003jzj.3, uc003jzu.3, uc003jzw.3, uc010ixu.3, uc010iyh.1, uc011crf.1, uc011crg.2, uc011cro.2	ATGTTTCATTGTCAAGAGCAGTCATGATGGCCTGCACTCCACACAATGCAACAGAGTGAA	387036	intergenic							193.716	17.2777	6.91247	3.53868
ASHGA5P019043	3.13445	3.13445	1.64821	up	noncoding	NR_028033	FAS	RefSeq	2583	chr10	+	90750287	90775542	NR_028036	GAAGGACATGATGTGAACATGGAATCATCAAGGAATGCACACTCACCAGCAACACCAAGT	355	exon sense-overlapping	NM_000043	FAS	tumor necrosis factor receptor superfamily member 6 isoform 1 precursor	+	90750287	90775542	18.5047	5	3.96946	2.32125
ASHGA5P019043	3.13445	3.13445	1.64821	up	noncoding	NR_028033	FAS	RefSeq	2583	chr10	+	90750287	90775542	NR_028036	GAAGGACATGATGTGAACATGGAATCATCAAGGAATGCACACTCACCAGCAACACCAAGT	355	exon sense-overlapping	NM_152871	FAS	tumor necrosis factor receptor superfamily member 6 isoform 2 precursor	+	90750287	90775542	18.5047	5	3.96946	2.32125
ASHGA5P019043	3.13445	3.13445	1.64821	up	noncoding	NR_028033	FAS	RefSeq	2583	chr10	+	90750287	90775542	NR_028036	GAAGGACATGATGTGAACATGGAATCATCAAGGAATGCACACTCACCAGCAACACCAAGT	355	exon sense-overlapping	NM_152872	FAS	tumor necrosis factor receptor superfamily member 6 isoform 3 precursor	+	90750287	90775542	18.5047	5	3.96946	2.32125
ASHGA5P019043	3.13445	3.13445	1.64821	up	noncoding	NR_028033	FAS	RefSeq	2583	chr10	+	90750287	90775542	NR_028036	GAAGGACATGATGTGAACATGGAATCATCAAGGAATGCACACTCACCAGCAACACCAAGT	355	intronic antisense	NM_001141945	ACTA2	actin, aortic smooth muscle	-	90694830	90751147	18.5047	5	3.96946	2.32125
ASHGA5P023459	2.24424	2.24424	1.16623	up	noncoding	ENST00000581412	CTD-2006K23.1	GENCODE	529	chr17	+	72595978	72600408		ATCCTTCCAGCAACTCCAAGAAAACAATCTGAACCTAAGACAACAGACGCAGCTGCACCT		intergenic							187.776	71.7718	6.87336	5.70713
ASHGA5P046820	234.165	234.165	7.87138	up	noncoding	ENST00000417071	TTTY15	GENCODE	882	chrY	+	14774467	14800184	ENST00000457658, ENST00000543097, NR_001545	TAGTGAAACTGCCTTTGCAGTGACTCAAGAAAAACTCATCACCTGGAGTCCGTGTAAGCT	64595	intergenic							2853.97	5	10.1926	2.32125
ASHGA5P021416	2.32172	2.32172	1.21519	up	noncoding	NR_027017	PGAP2	RefSeq	2175	chr11	+	3819188	3847601		AAGAAGCACACAGTAAGTCAGGAGTGGAAGCGGCAGGAATACCACTGCTCCTCGGCCCAT	27315	exon sense-overlapping	NM_001145438	PGAP2	post-GPI attachment to proteins factor 2 isoform 2	+	3819048	3847601	75.219	34.5675	5.78686	4.57166
ASHGA5P021416	2.32172	2.32172	1.21519	up	noncoding	NR_027017	PGAP2	RefSeq	2175	chr11	+	3819188	3847601		AAGAAGCACACAGTAAGTCAGGAGTGGAAGCGGCAGGAATACCACTGCTCCTCGGCCCAT	27315	exon sense-overlapping	NM_001256235	PGAP2	post-GPI attachment to proteins factor 2 isoform 3	+	3818953	3847601	75.219	34.5675	5.78686	4.57166
ASHGA5P021416	2.32172	2.32172	1.21519	up	noncoding	NR_027017	PGAP2	RefSeq	2175	chr11	+	3819188	3847601		AAGAAGCACACAGTAAGTCAGGAGTGGAAGCGGCAGGAATACCACTGCTCCTCGGCCCAT	27315	exon sense-overlapping	NM_001256236	PGAP2	post-GPI attachment to proteins factor 2 isoform 4	+	3819048	3847601	75.219	34.5675	5.78686	4.57166
ASHGA5P021416	2.32172	2.32172	1.21519	up	noncoding	NR_027017	PGAP2	RefSeq	2175	chr11	+	3819188	3847601		AAGAAGCACACAGTAAGTCAGGAGTGGAAGCGGCAGGAATACCACTGCTCCTCGGCCCAT	27315	exon sense-overlapping	NM_001256237	PGAP2	post-GPI attachment to proteins factor 2 isoform 5	+	3819048	3847601	75.219	34.5675	5.78686	4.57166
ASHGA5P021416	2.32172	2.32172	1.21519	up	noncoding	NR_027017	PGAP2	RefSeq	2175	chr11	+	3819188	3847601		AAGAAGCACACAGTAAGTCAGGAGTGGAAGCGGCAGGAATACCACTGCTCCTCGGCCCAT	27315	exon sense-overlapping	NM_001256238	PGAP2	post-GPI attachment to proteins factor 2 isoform 6	+	3829239	3847601	75.219	34.5675	5.78686	4.57166
ASHGA5P021416	2.32172	2.32172	1.21519	up	noncoding	NR_027017	PGAP2	RefSeq	2175	chr11	+	3819188	3847601		AAGAAGCACACAGTAAGTCAGGAGTGGAAGCGGCAGGAATACCACTGCTCCTCGGCCCAT	27315	exon sense-overlapping	NM_001256239	PGAP2	post-GPI attachment to proteins factor 2 isoform 7	+	3829765	3847601	75.219	34.5675	5.78686	4.57166
ASHGA5P021416	2.32172	2.32172	1.21519	up	noncoding	NR_027017	PGAP2	RefSeq	2175	chr11	+	3819188	3847601		AAGAAGCACACAGTAAGTCAGGAGTGGAAGCGGCAGGAATACCACTGCTCCTCGGCCCAT	27315	exon sense-overlapping	NM_001256240	PGAP2	post-GPI attachment to proteins factor 2 isoform 8	+	3829765	3847601	75.219	34.5675	5.78686	4.57166
ASHGA5P021416	2.32172	2.32172	1.21519	up	noncoding	NR_027017	PGAP2	RefSeq	2175	chr11	+	3819188	3847601		AAGAAGCACACAGTAAGTCAGGAGTGGAAGCGGCAGGAATACCACTGCTCCTCGGCCCAT	27315	exon sense-overlapping	NM_014489	PGAP2	post-GPI attachment to proteins factor 2 isoform 1	+	3829765	3847601	75.219	34.5675	5.78686	4.57166
ASHGA5P023312	133.533	133.533	7.06105	up	noncoding	NR_038417	BZRAP1-AS1	RefSeq	2267	chr17	+	56414562	56431088	NR_038411, NR_038413, NR_038415	TGACCCAGTGAGTCTACTCAGGGTCAGGCATCCTTTCCGACTACTCACTCAGCAGCGGAT	100506779	natural antisense	NM_003168	SUPT4H1	transcription elongation factor SPT4	-	56422538	56429563	2754.66	12.4015	10.1363	3.07523
ASHGA5P023312	133.533	133.533	7.06105	up	noncoding	NR_038417	BZRAP1-AS1	RefSeq	2267	chr17	+	56414562	56431088	NR_038411, NR_038413, NR_038415	TGACCCAGTGAGTCTACTCAGGGTCAGGCATCCTTTCCGACTACTCACTCAGCAGCGGAT	100506779	natural antisense	NM_017763	RNF43	E3 ubiquitin-protein ligase RNF43 precursor	-	56431037	56494931	2754.66	12.4015	10.1363	3.07523
ASHGA5P035708	31.2057	31.2057	4.96374	up	noncoding	ENST00000483023	RP11-521D12.2	GENCODE	1852	chr2	+	9814151	9848542		AAATATTAAGACACCAAGAAACCACCACATCAAAAATGAAGGGAACATTCGTTCAGAGAA		intergenic							731.972	17.2332	8.49931	3.53557
ASHGA5P055461	4.88746	4.88746	2.28909	up	noncoding	TCONS_00028266	XLOC_013612	LincRNAs identified by Cabili et al	3322	chr20	+	62030713	62034595	TCONS_00028265, TCONS_00028267, TCONS_00028268	ATGGCAGGTCCAAGCCCTGTGAACCATCCCTCTCACACCACGTCTGCCGGGCACCCTCCA		intergenic							32989.8	3633.97	14.1664	11.8773
ASHGA5P030919	150.754	150.754	7.23605	up	noncoding	ENST00000570409	RP11-461A8.4	GENCODE	1068	chr16	-	3700636	3701704		AACTCACAGAGCACCATCAGATCCTTCTGAATTTTGAAGGAAGCAATGATACTCTGCTCT		intronic antisense	ENST00000407479	DNASE1	deoxyribonuclease I [Source:HGNC Symbol;Acc:2956]	+	3692938	3708095	4437.34	18.3308	10.8656	3.62951
ASHGA5P034032	2.72086	2.72086	1.44406	up	noncoding	ENST00000326734	FAM87B	GENCODE	1944	chr1	+	752750	755214		CAGATCAGACAACCAACCACACAAAGTTTCTAAGAGCAAACTGTTCAGGTCGGCAAGTCA	400728	intergenic							17.4183	6.89836	3.88388	2.43982
ASHGA5P047115	8.39511	8.39511	3.06955	up	noncoding	TCONS_00013653	XLOC_006309	LincRNAs identified by Cabili et al	1044	chr7	+	156696054	156714884		GAAAAACTCCTCTGCTGCTTCTTCCTCTGATTTCACATTCGGTAAACCTGCAAGTGCACA		intergenic							69507.5	5600.01	15.6073	12.5377
ASHGA5P021580	2.07123	2.07123	1.05049	up	noncoding	ENST00000535533	AP000476.1	GENCODE	2904	chr21	+	25801053	25862621		TTCTGGAGAGATGTTCAGCAAACCATCCTTGCAGCTGTTTTTGCTTTCATCATCCCATTC		intergenic							50.1742	27.4292	5.27643	4.22594
ASHGA5P016068	2.55874	2.55874	1.35543	up	noncoding	NR_024518	LMAN2L	RefSeq	2375	chr2	-	97371666	97405813		TGGTACACAAAGGATCGGATGCAGCCAGGCCCAGAAGAGGCGATATTCTCCAGGAGTCCA	81562	exon sense-overlapping	NM_001142292	LMAN2L	VIP36-like protein isoform 1 precursor	-	97371666	97405813	15.0756	5	3.67668	2.32125
ASHGA5P016068	2.55874	2.55874	1.35543	up	noncoding	NR_024518	LMAN2L	RefSeq	2375	chr2	-	97371666	97405813		TGGTACACAAAGGATCGGATGCAGCCAGGCCCAGAAGAGGCGATATTCTCCAGGAGTCCA	81562	exon sense-overlapping	NM_030805	LMAN2L	VIP36-like protein isoform 2 precursor	-	97371666	97405813	15.0756	5	3.67668	2.32125
ASHGA5P016658	2.0793	2.0793	1.0561	up	noncoding	NR_026920	MORC2-AS1	RefSeq	2134	chr22	+	31318294	31322640		TCTAGGCCAGCCTTGTGCAAAGGACCTTCTCACCACAGATCAGCCAGACCATCTTCCTCC	150291	natural antisense	NM_014941	MORC2	MORC family CW-type zinc finger protein 2	-	31322599	31364187	24.3605	14.3054	4.32729	3.27119
ASHGA5P029764	12.9762	12.9762	3.6978	up	noncoding	TCONS_00008102	XLOC_003569	LincRNAs identified by Cabili et al	306	chr4	+	73435479	73435879		AGTACACAGGCCTCAGCGACTCTTCCTCACACCCAGATTAAGTTATCAAATGATTTCTGC		intergenic							1771.18	79.7972	9.57331	5.87552
ASHGA5P031324	92.5586	92.5586	6.5323	up	noncoding	ENST00000568819	RP11-525K10.3	GENCODE	601	chr16	-	80251931	80574767		GAAGACAAAAAAGCAACATAAGAACACACTTCCCAATAATGTGAAGATCTATGACTGTAC		natural antisense	ENST00000562982	DYNLRB2	dynein, light chain, roadblock-type 2 [Source:HGNC Symbol;Acc:15467]	+	80574630	80584538	995.996	5	8.85355	2.32125
ASHGA5P039839	2.50685	2.50685	1.32588	up	noncoding	TCONS_00022820	XLOC_011091	LincRNAs identified by Cabili et al	373	chr14	-	84667416	84688047		AATAAACACTACTTAGGAGAATCAGTCTCAGCTGGACCAAACCTCTCAGTCCCACTCGAT		intergenic							29.4081	14.2739	4.59432	3.26844
ASHGA5P018827	5.26703	5.26703	2.39699	up	noncoding	ENST00000458016	RP11-575L7.2	GENCODE	476	chr9	+	86444570	86452502	ENST00000439544	ATATTAATCCAGCCCCTCAAGGCAGTCATCTGTCTTAGAGCTATTGGAATCCTGGATCAT		natural antisense	NM_017576	KIF27	kinesin-like protein KIF27	-	86451614	86536342	1376.51	147.362	9.24938	6.85238
ASHGA5P057095	201.368	201.368	7.65369	up	noncoding	TCONS_00013058	XLOC_006210	LincRNAs identified by Cabili et al	505	chr7	+	112258125	112260698		TTATCTTCTTCAGCAAGTTCTTCTTTCAGTTCTGTAATCCCAACAATTTGGGAGGCCAAG		intergenic							4470.22	13.776	10.8742	3.22053
ASHGA5P048166	2.2961	2.2961	1.19919	up	noncoding	AV732395		LincRNAs identified by Khalil et al	371	chr3	-	189170788	189171091		TAGAACAGGCATTGCAAGGGTAATGATCTTGAGCTAATTCCACCTAATAAAATGGACTTG		intergenic							48.7395	24.3208	5.24144	4.04225
ASHGA5P030766	2.85493	2.85493	1.51346	up	noncoding	uc021svq.1	AK024092	UCSC_knowngene	3264	chr15	+	93438055	93441319		TATCTTCAAGGTGGGTGGATGTTTTCTGTTTAAAAGATTAAGATGCCAACAGCGTTTTTT		intron sense-overlapping	ENST00000556722	CHD2	chromodomain helicase DNA binding protein 2 [Source:HGNC Symbol;Acc:1917]	+	93426525	93480855	16.8229	5	3.83471	2.32125
ASHGA5P020670	19.1112	19.1112	4.25634	up	noncoding	ENST00000518213	RP11-231D20.2	GENCODE	815	chr8	-	42123646	42128715		GACAAAGGAGTGAAGCAAAGCAGCACTGAGCTCCTCCAAGTAAAGAAAGAATTGTTTTCT		bidirectional	NM_001190720	IKBKB	inhibitor of nuclear factor kappa-B kinase subunit beta isoform 2	+	42128819	42190171	246.192	11.247	7.19118	2.93484
ASHGA5P020670	19.1112	19.1112	4.25634	up	noncoding	ENST00000518213	RP11-231D20.2	GENCODE	815	chr8	-	42123646	42128715		GACAAAGGAGTGAAGCAAAGCAGCACTGAGCTCCTCCAAGTAAAGAAAGAATTGTTTTCT		bidirectional	NM_001242778	IKBKB	inhibitor of nuclear factor kappa-B kinase subunit beta isoform 5	+	42128819	42190171	246.192	11.247	7.19118	2.93484
ASHGA5P020670	19.1112	19.1112	4.25634	up	noncoding	ENST00000518213	RP11-231D20.2	GENCODE	815	chr8	-	42123646	42128715		GACAAAGGAGTGAAGCAAAGCAGCACTGAGCTCCTCCAAGTAAAGAAAGAATTGTTTTCT		bidirectional	NM_001556	IKBKB	inhibitor of nuclear factor kappa-B kinase subunit beta isoform 1	+	42128819	42190171	246.192	11.247	7.19118	2.93484
ASHGA5P057472	17.6104	17.6104	4.13835	up	noncoding	TCONS_00018149	XLOC_008428	LincRNAs identified by Cabili et al	1583	chr10	+	29420637	29423296		TTTATGGATATTCCAGGCATGAGAACTGACACTCACAGCATTCACACAGCATGCCAAGTG		intergenic							549.56	24.0603	8.16546	4.0271
ASHGA5P032271	36.2191	36.2191	5.17868	up	noncoding	BE174175		LincRNAs identified by Khalil et al	327	chr10	+	112287106	112287405		TGGGGATGGGGAGAGCCCTTCCGGCATTCCTTCTCTCATTCACTCTAATAACATTTATAT		intergenic							7524.37	113.114	11.6085	6.42985
ASHGA5P058867	69.5806	69.5806	6.12061	up	noncoding	uc.470-	uc.470	UCR	341	chrX	-	25401215	25401556		ATTAAAACTGACCTTGTCATTTCACTGCCTGTAAAACACCATTATCTCACCATTTATCAC		intergenic							6223.14	52.6619	11.3409	5.22027
ASHGA5P041140	6.47814	6.47814	2.69558	up	noncoding	uc003jzw.3	SMA4	UCSC_knowngene	2015	chr5	+	70015685	70150220	ENST00000417194, ENST00000421064, ENST00000422506, ENST00000423913, ENST00000434893, ENST00000435868, ENST00000445682, ENST00000449061, ENST00000451837, ENST00000452737, ENST00000463434, ENST00000479900, ENST00000487022, ENST00000492832, ENST00000507274, ENST00000508260, ENST00000514048, NR_024054, NR_027026, NR_029426, uc002zxh.4, uc002zxi.4, uc002zxk.4, uc002zxl.4, uc002zxm.3, uc003jyo.1, uc010…	ACGCAGAAAATACGTGGTTGGAGAGCTCATCTGGAATTTTGCCGATTTCATGACTAACCA		intergenic							40.887	5	5.01683	2.32125
ASHGA5P058717	4.18031	4.18031	2.06361	up	noncoding	uc.332-	uc.332	UCR	337	chr11	-	116232689	116233026		AGACTGTCTGGTAAAGAGATAAATAAGTGTCTCTTCAAATCCTCGATCTCCTCTTCTCTA		intergenic							55.4051	15.0226	5.40366	3.34005
ASHGA5P030215	108.56	108.56	6.76235	up	noncoding	ENST00000515341	GOLGA6L5	pseudogene	1828	chr15	-	85053156	85060016	ENST00000414190, ENST00000506719, NM_001164465, NM_001267536, NM_198181, uc010upk.1	AGGCTGCATGCCATTCTTTTCGGGCTGCGGAGAACAGGGAGCTAAACATCACCATCATCT	374650								15810.7	93.5088	12.8823	6.11996
ASHGA5P031492	3.16304	3.16304	1.66131	up	noncoding	ENST00000570995	RP11-473M20.8	GENCODE	939	chr16	+	3104342	3105381		GACAAGGCAGGGAAGAAGGTGAGAGATGAAAGATATCGCCCTGATTGAAACACCAAACTA		intron sense-overlapping	NM_022468	MMP25	matrix metalloproteinase-25 preproprotein	+	3096681	3110724	18.6853	5	3.98256	2.32125
ASHGA5P056913	14.1477	14.1477	3.82249	up	noncoding	TCONS_00010462	XLOC_004983	LincRNAs identified by Cabili et al	387	chr5	-	124329348	124331780		AAAGGATAGTCCATCTGGATGTTTCTTTCTTTCTCCTAACTGTGACCTCAGCCTGCTCCA		intergenic							6877.8	243.836	11.4837	7.66122
ASHGA5P032467	2.1009	2.1009	1.071	up	noncoding	uc021tyo.1	AX747150	UCSC_knowngene	2331	chr17	-	43590733	43593064		GATCTCCCACTTTGCTCATGTAGAGAGTGAAATATAGATTAGGGCACAAGATGAACTGTA		intronic antisense	ENST00000253803	AC091132.2	Uncharacterized protein [Source:UniProtKB/TrEMBL;Acc:H7BXE8]	+	43580625	43611631	132.579	58.4071	6.4538	5.3828
ASHGA5P036882	3.35477	3.35477	1.74622	up	noncoding	ENST00000431361	OGFR-AS1	GENCODE	668	chr20	-	61431978	61436939		GTATTTGAAGTGCTTGTCACAGTCCACAAAATAACCACTCAGAATCTGTTACTATTTTGT		intronic antisense	NM_007346	OGFR	opioid growth factor receptor	+	61436176	61445352	19.9641	5	4.06747	2.32125
ASHGA5P018654	4.00269	4.00269	2.00097	up	noncoding	ENST00000456100	AL163953.3	GENCODE	562	chr14	+	53684429	54153976		ATGGAAGGAGCTTGGGGCCAGTCATCATCTTAAAGGCTCTGTGGCAGCTTGGACTTGAAG		intergenic							28.7471	8.4903	4.56254	2.56157
ASHGA5P056497	2.45655	2.45655	1.29663	up	noncoding	TCONS_00004878	XLOC_001641	LincRNAs identified by Cabili et al	313	chr2	+	121334630	121345836		CCTGTCCTACAGAAATGTAACAGGACCCACTGTGCACCTGCACTCTTCTAGACTCAGACG		intergenic							35.9324	17.4477	4.8516	3.55497
ASHGA5P046071	18.6371	18.6371	4.2201	up	noncoding	uc004cos.4	TVAS5	UCSC_knowngene	2509	chrM	+	1755	4264		ATGAAGTCACCCTAGCCATCATTCTACTATCAACATTACTAATAAGTGGCTCCTTTAACC		intergenic							7237.19	197.702	11.5513	7.33119
ASHGA5P056766	2.67448	2.67448	1.41926	up	noncoding	TCONS_00008529	XLOC_004016	LincRNAs identified by Cabili et al	824	chr4	-	90459366	90472707		AATTACAGAGGGTGATAATAATTTCAGTTGGAGCCTCACTGGTAACCTTGCTCAGCCACA		intergenic							15.7393	5	3.74051	2.32125
ASHGA5P025814	7.76406	7.76406	2.95681	up	noncoding	NR_038218	LOC154092	RefSeq	1474	chr6	+	134759527	134825158		AATTCTGACAGTGATCTGGCTGGAGTGCAGTGGTGCACACGCCTCACACTGTGACACAGC	154092	intergenic							6618.57	404.558	11.4172	8.46035
ASHGA5P027877	219.599	219.599	7.77873	up	noncoding	ENST00000542489	RP11-59N23.1	GENCODE	456	chr12	+	21912913	21919639		AGAACACCATCAGGTCACATTTTGAATAATGAAATATGCCAAGCTGAGCTTTTCATTTTC		natural antisense	NM_004982	KCNJ8	ATP-sensitive inward rectifier potassium channel 8	-	21917888	21927755	2682.34	5	10.1	2.32125
ASHGA5P030980	2.16487	2.16487	1.11428	up	noncoding	ENST00000548268	MIR3180-1	GENCODE	1459	chr16	-	15003743	15005202	ENST00000552015	TTGAAAGACAAGAGGGAGGAAACCCACATCCTTCATTCCCCATCCATTCATTTATTGCCT	100422870	intergenic							54201.6	16475.3	15.1372	14.0229
ASHGA5P000372	2.62873	2.62873	1.39436	up	noncoding	chr2:88735550-88749975+	chr2:88735550-88749975	LincRNAs identified by Khalil et al	14425	chr2	+	88954435	88968860		AGGCTATCTTTCGGTAGAGTGACCAACTGTCCCAGATTCCCAAGGTTTTATAGGATATGG		intergenic							16.0214	5.89443	3.76378	2.36941
ASHGA5P049954	4.65122	4.65122	2.21761	up	noncoding	ENST00000582375	RP11-143J12.2	GENCODE	770	chr18	-	9121262	9136643		ATTCTGCACATCTCCCTACACCTTAGTGACGGTTAAATAAATAATTATTAAGCTTCTGGA		intronic antisense	NM_021074	NDUFV2	NADH dehydrogenase [ubiquinone] flavoprotein 2, mitochondrial precursor	+	9102627	9134343	911.024	121.405	8.75967	6.54207
ASHGA5P054667	2.31287	2.31287	1.20968	up	noncoding	ENST00000447298	H19	GENCODE	524	chr11	-	2016917	2017697		CTCCCCACAGCCAGGTCTCCAGCTGGGGTGGACGTGCCCACCAGCTGCCGAAGGCCAAGA	283120	intergenic							119.743	49.3968	6.33664	5.12696
ASHGA5P000434	21.4484	21.4484	4.4228	up	noncoding	chr4:84893350-84907125+	chr4:84893350-84907125	LincRNAs identified by Khalil et al	13775	chr4	+	84674326	84688101		CATCATCCCTTTAATAACCTGTAATATTGTAGCAGGATATTTTTGTCACACCGAATCTGA		intergenic							233.916	9.59415	7.13714	2.71434
ASHGA5P040946	3.66	3.66	1.87184	up	noncoding	ENST00000503386	CTD-2194D22.1	GENCODE	428	chr5	+	1851063	1851611		TCCTGAGTCAGCAGGACCCCGTCCGTTCGTCTTTCACCCCCATTCCTTGCTACTCCAGGG		intergenic							8936.99	1065.71	11.886	10.0141
ASHGA5P056829	188.942	188.942	7.5618	up	noncoding	TCONS_00009112	XLOC_004054	LincRNAs identified by Cabili et al	1596	chr4	-	120038633	120049505		ACAAGCATATCACTTGTTCTTCCTCTATAAGAAGATCTTGGTTTATCTTGGCTCTTCCAT		intergenic							3478.57	11.2451	10.4964	2.93462
ASHGA5P028793	4.82672	4.82672	2.27104	up	noncoding	ENST00000434273	ENOX1-AS2	GENCODE	248	chr13	+	44032600	44033259		TAATTTTGATTGATTGATGCTCCCTCCTATAGCAGCATACAAATTTTAGAGTGGGAGAAA		intronic antisense	NM_001127615	ENOX1	ecto-NOX disulfide-thiol exchanger 1	-	43787699	44203613	44.6545	10.6304	5.12716	2.85612
ASHGA5P028793	4.82672	4.82672	2.27104	up	noncoding	ENST00000434273	ENOX1-AS2	GENCODE	248	chr13	+	44032600	44033259		TAATTTTGATTGATTGATGCTCCCTCCTATAGCAGCATACAAATTTTAGAGTGGGAGAAA		intronic antisense	NM_001242863	ENOX1	ecto-NOX disulfide-thiol exchanger 1	-	43787665	44361116	44.6545	10.6304	5.12716	2.85612
ASHGA5P028793	4.82672	4.82672	2.27104	up	noncoding	ENST00000434273	ENOX1-AS2	GENCODE	248	chr13	+	44032600	44033259		TAATTTTGATTGATTGATGCTCCCTCCTATAGCAGCATACAAATTTTAGAGTGGGAGAAA		intronic antisense	NM_017993	ENOX1	ecto-NOX disulfide-thiol exchanger 1	-	43787665	44361116	44.6545	10.6304	5.12716	2.85612
ASHGA5P000597	20.0892	20.0892	4.32835	up	noncoding	DC428746		LincRNAs identified by Khalil et al	577	chr2	+	143828536	143986326		AACAGATCAAACTGAGTTTATAGCCAGCACCATCTCTGCTGTTAGCTCCACCCTGAAGTT		exon sense-overlapping	ENST00000295095	ARHGAP15	Rho GTPase activating protein 15 [Source:HGNC Symbol;Acc:21030]	+	143886882	144525921	1741.22	52.4077	9.5425	5.21415
ASHGA5P000597	20.0892	20.0892	4.32835	up	noncoding	DC428746		LincRNAs identified by Khalil et al	577	chr2	+	143828536	143986326		AACAGATCAAACTGAGTTTATAGCCAGCACCATCTCTGCTGTTAGCTCCACCCTGAAGTT		exon sense-overlapping	ENST00000409869	ARHGAP15	Rho GTPase activating protein 15 [Source:HGNC Symbol;Acc:21030]	+	143848930	143995921	1741.22	52.4077	9.5425	5.21415
ASHGA5P000597	20.0892	20.0892	4.32835	up	noncoding	DC428746		LincRNAs identified by Khalil et al	577	chr2	+	143828536	143986326		AACAGATCAAACTGAGTTTATAGCCAGCACCATCTCTGCTGTTAGCTCCACCCTGAAGTT		exon sense-overlapping	NM_018460	ARHGAP15	rho GTPase-activating protein 15	+	143886898	144525921	1741.22	52.4077	9.5425	5.21415
ASHGA5P034747	3.75642	3.75642	1.90936	up	noncoding	TCONS_00004641	XLOC_002554	LincRNAs identified by Cabili et al	1867	chr2	-	242671428	242673870		ATGATTCAAAACCCATAAAGATTACCACCCATACCATCCCCTAAAATAACTGATTTTTCT		intergenic							62667.9	11272	15.4198	13.5104
ASHGA5P043756	588.927	588.927	9.20194	up	noncoding	ENST00000428678	UPK3BP1	pseudogene	509	chr7	+	76633978	76635091	NM_030570, NM_182684	ACAGAGCTGGTGCCCTACACACCACAGATAACAGCTTGGGACCTGGAAGGGAAGGTCACA									64781.4	103	15.4775	6.27559
ASHGA5P016915	2.25325	2.25325	1.17201	up	noncoding	ENST00000435645	RP11-14C22.4	GENCODE	525	chr10	+	30982590	30987392		CTCAGAAGGCCCTCATGAAGTAAAAAGGATATCTTCCAACTCCAGCTTCTCAGAAGTCAC		intergenic							33.408	17.8175	4.76107	3.58906
ASHGA5P032052	69.035	69.035	6.10926	up	noncoding	TCONS_00016018	XLOC_007412	LincRNAs identified by Cabili et al	356	chr9	+	77791048	77794685		TCACCAATCCAGTGCTCACTTATCCATGTCAGCTCTTTAAGTCATGTCTGAGATCCCTGA		intergenic							5223	44.7085	11.0846	4.9753
ASHGA5P028904	2.29921	2.29921	1.20114	up	noncoding	uc001vmc.3	BC045767	UCSC_knowngene	2894	chr13	+	95413194	95587664		TCTTTCCTCTGTGTTCGTCATTTTATCAAATTACTGGAAGCTGGGAGTTGAGGCCAAAAG		intergenic							25.0565	13.2167	4.36361	3.16247
ASHGA5P028843	10.003	10.003	3.32237	up	noncoding	NR_046539	DIAPH3-AS1	RefSeq	467	chr13	+	60586884	60618490		GAGCATACTCTGATTTCACAGTTTTAACCATCATCCTGTGACCCCAAAAGTCCATCACAG	100874195	intronic antisense	NM_001258370	DIAPH3	protein diaphanous homolog 3 isoform g	-	60435387	60587343	24970.1	1330.01	13.656	10.3337
ASHGA5P028843	10.003	10.003	3.32237	up	noncoding	NR_046539	DIAPH3-AS1	RefSeq	467	chr13	+	60586884	60618490		GAGCATACTCTGATTTCACAGTTTTAACCATCATCCTGTGACCCCAAAAGTCCATCACAG	100874195	intronic antisense	NM_030932	DIAPH3	protein diaphanous homolog 3 isoform b	-	60348296	60587343	24970.1	1330.01	13.656	10.3337
ASHGA5P028843	10.003	10.003	3.32237	up	noncoding	NR_046539	DIAPH3-AS1	RefSeq	467	chr13	+	60586884	60618490		GAGCATACTCTGATTTCACAGTTTTAACCATCATCCTGTGACCCCAAAAGTCCATCACAG	100874195	natural antisense	NM_001042517	DIAPH3	protein diaphanous homolog 3 isoform a	-	60239722	60738119	24970.1	1330.01	13.656	10.3337
ASHGA5P028843	10.003	10.003	3.32237	up	noncoding	NR_046539	DIAPH3-AS1	RefSeq	467	chr13	+	60586884	60618490		GAGCATACTCTGATTTCACAGTTTTAACCATCATCCTGTGACCCCAAAAGTCCATCACAG	100874195	natural antisense	NM_001258366	DIAPH3	protein diaphanous homolog 3 isoform c	-	60239720	60738119	24970.1	1330.01	13.656	10.3337
ASHGA5P028843	10.003	10.003	3.32237	up	noncoding	NR_046539	DIAPH3-AS1	RefSeq	467	chr13	+	60586884	60618490		GAGCATACTCTGATTTCACAGTTTTAACCATCATCCTGTGACCCCAAAAGTCCATCACAG	100874195	natural antisense	NM_001258367	DIAPH3	protein diaphanous homolog 3 isoform d	-	60239720	60738119	24970.1	1330.01	13.656	10.3337
ASHGA5P028843	10.003	10.003	3.32237	up	noncoding	NR_046539	DIAPH3-AS1	RefSeq	467	chr13	+	60586884	60618490		GAGCATACTCTGATTTCACAGTTTTAACCATCATCCTGTGACCCCAAAAGTCCATCACAG	100874195	natural antisense	NM_001258368	DIAPH3	protein diaphanous homolog 3 isoform e	-	60239720	60738119	24970.1	1330.01	13.656	10.3337
ASHGA5P028843	10.003	10.003	3.32237	up	noncoding	NR_046539	DIAPH3-AS1	RefSeq	467	chr13	+	60586884	60618490		GAGCATACTCTGATTTCACAGTTTTAACCATCATCCTGTGACCCCAAAAGTCCATCACAG	100874195	natural antisense	NM_001258369	DIAPH3	protein diaphanous homolog 3 isoform f	-	60348296	60738119	24970.1	1330.01	13.656	10.3337
ASHGA5P000003	6.35144	6.35144	2.66708	up	noncoding	AA601302		LincRNAs identified by Khalil et al	625	chr21	-	11127021	11127438		CCAGAAGCTCCAGCATGGTCCACCTACCAGAAGCTCCAGCATGATTTACCCATGAGTAGC		intergenic							145.002	21.9142	6.56226	3.89517
ASHGA5P030023	36.0993	36.0993	5.1739	up	noncoding	uc001zyw.1	AK091906	UCSC_knowngene	1973	chr15	-	51132072	51144737		CAAAAATGATTTGAAGATCATCAGGCCACCACTCCCACCATAGGAACAGAGGACCTAACT		intergenic							11599.6	175.25	12.3126	7.13869
ASHGA5P051846	8.85586	8.85586	3.14663	up	noncoding	uc011btt.2	LOC401109	UCSC_knowngene	1847	chr3	+	195869625	195887761		AACCAGACCAGACCTCAAAACAGGTTTGCAGAATTAAGATGAGGAGCTGAGCTCAACACA	401109	intergenic							80.1528	9.57201	5.85809	2.71146
ASHGA5P039928	90.0766	90.0766	6.49308	up	noncoding	ENST00000444958	DANCR	GENCODE	709	chr4	+	53578990	53586518		AAACCTTTTGTGCCAGTCAAAAATTCTTGCTCTTGATATGTCATCACCGGAAACTACTTT	57291	intergenic							2230.9	15.611	9.88744	3.39436
ASHGA5P027271	2.80714	2.80714	1.4891	up	noncoding	ENST00000552806	RP11-469H8.8	GENCODE	560	chr12	-	50348421	50349908		AGAGAACTTGGGGATGAACACACTTGCACACTAGTAAAACCAGTTGCATCATTCCCGGAA		natural antisense	NM_000486	AQP2	aquaporin-2	+	50344523	50352664	20.78	9.08765	4.12445	2.63535
ASHGA5P016300	2.10925	2.10925	1.07673	up	noncoding	ENST00000429070	RP11-589B3.6	GENCODE	606	chr10	-	81388512	81391944		AAAGAGAGACAGAAGGAAGAGAATGTTTGTCAAATGTCTTCTTTGGGCACCTCACAGGGC		intergenic							57.1676	30.0738	5.44212	4.36539
ASHGA5P040544	13.4754	13.4754	3.75226	up	noncoding	ENST00000512090	VCAN-AS1	GENCODE	424	chr5	-	82827170	82858133		ATCACAGCTGACATACATCCATCTGCAAATGTTGTATAGAAAGTCTTCTAAGATCTTCAG		intronic antisense	NM_001126336	VCAN	versican core protein isoform 2 precursor	+	82767492	82878122	871.845	44.2163	8.71087	4.95861
ASHGA5P040544	13.4754	13.4754	3.75226	up	noncoding	ENST00000512090	VCAN-AS1	GENCODE	424	chr5	-	82827170	82858133		ATCACAGCTGACATACATCCATCTGCAAATGTTGTATAGAAAGTCTTCTAAGATCTTCAG		intronic antisense	NM_001164097	VCAN	versican core protein isoform 3 precursor	+	82767492	82878122	871.845	44.2163	8.71087	4.95861
ASHGA5P040544	13.4754	13.4754	3.75226	up	noncoding	ENST00000512090	VCAN-AS1	GENCODE	424	chr5	-	82827170	82858133		ATCACAGCTGACATACATCCATCTGCAAATGTTGTATAGAAAGTCTTCTAAGATCTTCAG		intronic antisense	NM_001164098	VCAN	versican core protein isoform 4 precursor	+	82767492	82878122	871.845	44.2163	8.71087	4.95861
ASHGA5P040544	13.4754	13.4754	3.75226	up	noncoding	ENST00000512090	VCAN-AS1	GENCODE	424	chr5	-	82827170	82858133		ATCACAGCTGACATACATCCATCTGCAAATGTTGTATAGAAAGTCTTCTAAGATCTTCAG		intronic antisense	NM_004385	VCAN	versican core protein isoform 1 precursor	+	82767492	82878122	871.845	44.2163	8.71087	4.95861
ASHGA5P041010	3.91972	3.91972	1.97075	up	noncoding	TCONS_00022001	XLOC_010601	LincRNAs identified by Cabili et al	1443	chr13	-	48464984	48466696		CAGTAGACAGAAGCAAAGCATATTCCCTCCTCTCAAAGAGTTCTACATGGTACACTGCAG		intergenic							122.987	30.6998	6.36705	4.3963
ASHGA5P042900	2.72924	2.72924	1.4485	up	noncoding	TCONS_00019636	XLOC_009440	LincRNAs identified by Cabili et al	429	chr11	-	50231597	50233106		TATTCCTGTATTTCCTCAGTCCCTCCAATATTGCCTGGGAACTTCTGGTAACAGCAAACG		intergenic							183.798	58.77	6.84215	5.39366
ASHGA5P023052	2.17703	2.17703	1.12236	up	noncoding	ENST00000568619	RP11-80F22.10	GENCODE	1211	chr16	-	34681268	34683395		CATCATTCAGGCACCTCATATCTCACCCTGGAAACAAGCCATATGAATGTGAAGAAAATA		intergenic							831.33	226.221	8.65874	7.53638
ASHGA5P030668	56.4029	56.4029	5.8177	up	noncoding	NR_045123	LOC253044	RefSeq	1735	chr15	+	77934105	77941581		CAATGTAAATGTGTTTTAATAGCCACACACACGGTCATATAAATGGGAATGTTCTAGGTA	253044	intronic antisense	ENST00000559893	LINGO1	leucine rich repeat and Ig domain containing 1 [Source:HGNC Symbol;Acc:21205]	-	77908063	77988837	33158.6	381.303	14.1821	8.36436
ASHGA5P030668	56.4029	56.4029	5.8177	up	noncoding	NR_045123	LOC253044	RefSeq	1735	chr15	+	77934105	77941581		CAATGTAAATGTGTTTTAATAGCCACACACACGGTCATATAAATGGGAATGTTCTAGGTA	253044	intronic antisense	ENST00000561030	LINGO1	leucine rich repeat and Ig domain containing 1 [Source:HGNC Symbol;Acc:21205]	-	77906011	77988490	33158.6	381.303	14.1821	8.36436
ASHGA5P030668	56.4029	56.4029	5.8177	up	noncoding	NR_045123	LOC253044	RefSeq	1735	chr15	+	77934105	77941581		CAATGTAAATGTGTTTTAATAGCCACACACACGGTCATATAAATGGGAATGTTCTAGGTA	253044	intronic antisense	ENST00000561686	LINGO1	leucine rich repeat and Ig domain containing 1 [Source:HGNC Symbol;Acc:21205]	-	77907694	78079356	33158.6	381.303	14.1821	8.36436
ASHGA5P030668	56.4029	56.4029	5.8177	up	noncoding	NR_045123	LOC253044	RefSeq	1735	chr15	+	77934105	77941581		CAATGTAAATGTGTTTTAATAGCCACACACACGGTCATATAAATGGGAATGTTCTAGGTA	253044	intronic antisense	ENST00000562933	LINGO1	leucine rich repeat and Ig domain containing 1 [Source:HGNC Symbol;Acc:21205]	-	77908195	78112674	33158.6	381.303	14.1821	8.36436
ASHGA5P030668	56.4029	56.4029	5.8177	up	noncoding	NR_045123	LOC253044	RefSeq	1735	chr15	+	77934105	77941581		CAATGTAAATGTGTTTTAATAGCCACACACACGGTCATATAAATGGGAATGTTCTAGGTA	253044	intronic antisense	ENST00000563316	LINGO1	leucine rich repeat and Ig domain containing 1 [Source:HGNC Symbol;Acc:21205]	-	77908218	78113213	33158.6	381.303	14.1821	8.36436
ASHGA5P030668	56.4029	56.4029	5.8177	up	noncoding	NR_045123	LOC253044	RefSeq	1735	chr15	+	77934105	77941581		CAATGTAAATGTGTTTTAATAGCCACACACACGGTCATATAAATGGGAATGTTCTAGGTA	253044	intronic antisense	ENST00000564472	LINGO1	leucine rich repeat and Ig domain containing 1 [Source:HGNC Symbol;Acc:21205]	-	77908123	78013093	33158.6	381.303	14.1821	8.36436
ASHGA5P030668	56.4029	56.4029	5.8177	up	noncoding	NR_045123	LOC253044	RefSeq	1735	chr15	+	77934105	77941581		CAATGTAAATGTGTTTTAATAGCCACACACACGGTCATATAAATGGGAATGTTCTAGGTA	253044	intronic antisense	ENST00000566711	LINGO1	leucine rich repeat and Ig domain containing 1 [Source:HGNC Symbol;Acc:21205]	-	77908014	78111794	33158.6	381.303	14.1821	8.36436
ASHGA5P030668	56.4029	56.4029	5.8177	up	noncoding	NR_045123	LOC253044	RefSeq	1735	chr15	+	77934105	77941581		CAATGTAAATGTGTTTTAATAGCCACACACACGGTCATATAAATGGGAATGTTCTAGGTA	253044	intronic antisense	ENST00000567726	LINGO1	leucine rich repeat and Ig domain containing 1 [Source:HGNC Symbol;Acc:21205]	-	77907854	77999849	33158.6	381.303	14.1821	8.36436
ASHGA5P030668	56.4029	56.4029	5.8177	up	noncoding	NR_045123	LOC253044	RefSeq	1735	chr15	+	77934105	77941581		CAATGTAAATGTGTTTTAATAGCCACACACACGGTCATATAAATGGGAATGTTCTAGGTA	253044	intronic antisense	ENST00000570216	LINGO1	leucine rich repeat and Ig domain containing 1 [Source:HGNC Symbol;Acc:21205]	-	77908174	78113242	33158.6	381.303	14.1821	8.36436
ASHGA5P015111	16.0682	16.0682	4.00614	up	noncoding	NR_024090	LINC00320	RefSeq	2014	chr21	-	22114912	22175426	uc002yla.4, uc002ylb.4	CAGACAGAAGATCCTATCTGCGACAATTAAGAGCACTCTAAGAGGAAAACACATCCCACC	387486	intergenic							118.96	5	6.32739	2.32125
ASHGA5P047220	1279.11	1279.11	10.3209	up	noncoding	ENST00000455525	RP11-433J20.2	GENCODE	633	chr10	+	4067131	4070586		GGAACATCATCCCTCATCACTGGAAGAAATTACAAGGATTGTGTAAACAATTACAAGTAT		intergenic							56353.9	42.5118	15.2158	4.89488
ASHGA5P043426	8.49617	8.49617	3.08681	up	noncoding	uc003wjz.1	AK055458	UCSC_knowngene	3234	chr7	-	151062455	151065689		TTTCTAATTTCGTGAATGTTTGAGAACACATACACCATGTTTTACACACGTGTGCACGCA		natural antisense	NM_001243351	NUB1	NEDD8 ultimate buster 1 isoform 1	+	151038846	151075548	55.6554	5	5.40806	2.32125
ASHGA5P043426	8.49617	8.49617	3.08681	up	noncoding	uc003wjz.1	AK055458	UCSC_knowngene	3234	chr7	-	151062455	151065689		TTTCTAATTTCGTGAATGTTTGAGAACACATACACCATGTTTTACACACGTGTGCACGCA		natural antisense	NM_016118	NUB1	NEDD8 ultimate buster 1 isoform 2	+	151038846	151075548	55.6554	5	5.40806	2.32125
ASHGA5P026701	2.57894	2.57894	1.36678	up	noncoding	AI263816		LincRNAs identified by Khalil et al	416	chr6	+	109006489	109006903		TTCACTTGAGATTACTTCCCAATTTTTATTCTGTCTTCCAGAGGATTAAAGATGGAACTC		intergenic							37.4087	17.2993	4.90721	3.54043
ASHGA5P057188	2.97211	2.97211	1.57149	up	noncoding	TCONS_00014226	XLOC_006281	LincRNAs identified by Cabili et al	497	chr7	+	144084025	144088050	TCONS_00013617	TAAAATGTAAAGGCTACAGAATGAAGAAGCAAGTAAGGCTGGCACCTCACAGCATTGGCC		intergenic							1761.94	299.204	9.56321	7.99173
ASHGA5P051049	3.75724	3.75724	1.90967	up	noncoding	ENST00000426753	RP5-1043L13.1	GENCODE	651	chr20	+	58662894	58676427		CGTATCCTGCCGCCCGTTTTACCCGCGGGAAAGCCGAGGCCCGGTGCTGTATTCTGCCGC		intergenic							389.059	77.7748	7.74013	5.83045
ASHGA5P020662	3.35871	3.35871	1.74791	up	noncoding	ENST00000518129	CTB-118P15.2	GENCODE	647	chr8	+	88986392	89031341		CTTCACATGGTTAGGTGGAAACATCATTGATGCAGGATTTTTCTTTGTCTCCTTACCAGT		intergenic							19.9891	5	4.06916	2.32125
ASHGA5P036758	2.24224	2.24224	1.16494	up	noncoding	ENST00000434843	FER1L4	GENCODE	727	chr20	-	34191025	34194462		TTTGGATTGGAGTTTAGGGTCAGCACAGCATGGGTGTCACAAGCTTCCTCCTGTCCCCAG	80307	intergenic							26.6857	14.4569	4.45168	3.28674
ASHGA5P057238	9.85701	9.85701	3.30115	up	noncoding	TCONS_00014870	XLOC_006939	LincRNAs identified by Cabili et al	241	chr8	+	138720632	138729172		TATGAGCAAGTGGCGTTGCAATGTTTGTATCTCAGGAAGAAAACATCCCATCCAGTCCAC		intergenic							1245.67	76.9353	9.11478	5.81363
ASHGA5P058897	4.59886	4.59886	2.20128	up	noncoding	uc.355+	uc.355	UCR	228	chr13	+	95618881	95619109		GGCACCACTCACTGCCCCTATTATGCTATTGATTACCTCTGAATTCAATTTTTCTTTCAA		intergenic							24785.8	2684.49	13.6418	11.4405
ASHGA5P046147	9.73163	9.73163	3.28268	up	noncoding	ENST00000436893	MID1IP1-AS1	GENCODE	376	chrX	-	38660820	38663136		AGATAACCCTTCATCCCCCAGTTTCTTGACTCTGGCCGCTGTTCTTGAACATTTCTTAAA		intronic antisense	NM_001098790	MID1IP1	mid1-interacting protein 1	+	38660684	38665783	20141	1042.44	13.2688	9.98607
ASHGA5P046147	9.73163	9.73163	3.28268	up	noncoding	ENST00000436893	MID1IP1-AS1	GENCODE	376	chrX	-	38660820	38663136		AGATAACCCTTCATCCCCCAGTTTCTTGACTCTGGCCGCTGTTCTTGAACATTTCTTAAA		intronic antisense	NM_001098791	MID1IP1	mid1-interacting protein 1	+	38660684	38665783	20141	1042.44	13.2688	9.98607
ASHGA5P046147	9.73163	9.73163	3.28268	up	noncoding	ENST00000436893	MID1IP1-AS1	GENCODE	376	chrX	-	38660820	38663136		AGATAACCCTTCATCCCCCAGTTTCTTGACTCTGGCCGCTGTTCTTGAACATTTCTTAAA		natural antisense	NM_021242	MID1IP1	mid1-interacting protein 1	+	38663072	38665783	20141	1042.44	13.2688	9.98607
ASHGA5P030520	106.507	106.507	6.7348	up	noncoding	ENST00000558370	CTD-2007H18.1	GENCODE	325	chr15	+	48236240	48241706		GTTGCCCTCACTGTATGCCATCACCAGGAAGACAAGCAATAGATGATGAGTGAAAATAAA		intergenic							8466.82	47.7071	11.805	5.07017
ASHGA5P056138	26.6848	26.6848	4.73795	up	noncoding	ENST00000547644	RP11-164H13.1	GENCODE	673	chr14	+	96178083	96222004		ACCATACATCAGTCATCTGGCAGCAGCTCGAGAAGCATGTCCTCCACGCCGTCAATCTGA		natural antisense	NM_001098725	TCL1A	T-cell leukemia/lymphoma protein 1A	-	96176303	96180533	1968.69	45.1071	9.72436	4.98641
ASHGA5P056138	26.6848	26.6848	4.73795	up	noncoding	ENST00000547644	RP11-164H13.1	GENCODE	673	chr14	+	96178083	96222004		ACCATACATCAGTCATCTGGCAGCAGCTCGAGAAGCATGTCCTCCACGCCGTCAATCTGA		natural antisense	NM_021966	TCL1A	T-cell leukemia/lymphoma protein 1A	-	96176303	96180533	1968.69	45.1071	9.72436	4.98641
ASHGA5P057518	2.70296	2.70296	1.43454	up	noncoding	TCONS_00018462	XLOC_008760	LincRNAs identified by Cabili et al	327	chr10	-	28615099	28618930		AATAAAGAGAAGGGAGAAAGAGTGCCTGAAGGATCAATGTCGTACCCACACCTCTGACTT		intergenic							44.0065	18.9253	5.10993	3.67539
ASHGA5P058941	5.06833	5.06833	2.34151	up	noncoding	uc.339+	uc.339	UCR	252	chr12	+	54071095	54071347		ATTTATATGGGCCCGTTATTTCACACCGATCCTCCATCTGCATTTTTATGGCCCTGAGCT		intronic antisense	ENST00000338662	ATP5G2	ATP synthase, H+ transporting, mitochondrial Fo complex, subunit C2 (subunit 9) [Source:HGNC Symbol;Acc:842]	-	54058985	54071182	535.954	76.0235	8.13493	5.79342
ASHGA5P021049	507.829	507.829	8.9882	up	noncoding	ENST00000523992	RP11-556O5.3	pseudogene	854	chr8	+	8086126	8094763	NR_024361, NR_024362	TTGCAGAATGGGCCATCGAGAACCCGGCAGCCTTCACTCACTCTGTCTTAGAGCTTGGCA									24799	36.3939	13.6437	4.65546
ASHGA5P054814	12.7068	12.7068	3.66752	up	noncoding	ENST00000524410	RP11-430H10.1	GENCODE	605	chr11	+	45376921	45387672		CCCTTGGAAGCCAAGAATATGAGGAAGTCTTCTTCCTTCGCGCCTTCTTCTTCCTTACGC		intergenic							16006.6	651.041	12.9071	9.23955
ASHGA5P053902	96.2682	96.2682	6.58899	up	noncoding	ENST00000509780	RP13-297E16.3	GENCODE	510	chrX	+	1746638	1755356		CCATCTACAGGTAACACCCATCACTTTGAAACCAACAACTCAGATAAGATTCTGTTTATT		exon sense-overlapping	NM_001171038	ASMT	acetylserotonin O-methyltransferase isoform 1	+	1733940	1761974	5102.95	32.114	11.0564	4.46746
ASHGA5P053902	96.2682	96.2682	6.58899	up	noncoding	ENST00000509780	RP13-297E16.3	GENCODE	510	chrX	+	1746638	1755356		CCATCTACAGGTAACACCCATCACTTTGAAACCAACAACTCAGATAAGATTCTGTTTATT		exon sense-overlapping	NM_001171039	ASMT	acetylserotonin O-methyltransferase isoform 2	+	1734025	1761974	5102.95	32.114	11.0564	4.46746
ASHGA5P053902	96.2682	96.2682	6.58899	up	noncoding	ENST00000509780	RP13-297E16.3	GENCODE	510	chrX	+	1746638	1755356		CCATCTACAGGTAACACCCATCACTTTGAAACCAACAACTCAGATAAGATTCTGTTTATT		exon sense-overlapping	NM_004043	ASMT	acetylserotonin O-methyltransferase isoform 1	+	1714347	1761974	5102.95	32.114	11.0564	4.46746
ASHGA5P038651	8.36171	8.36171	3.0638	up	noncoding	ENST00000441644	AC023797.1	GENCODE	348	chr3	-	196358368	196359458		CAGCGAACCTCAGTCACTGACACTCAAAAGAAGGAATTATTTCAACTCAATAATAAACAA		intergenic							57.7062	6.32454	5.45353	2.38973
ASHGA5P016510	68.815	68.815	6.10465	up	noncoding	ENST00000431145	ZFY-AS1	GENCODE	419	chrY	-	2869668	2870612		GAGGCTAAAGTCCTGTCAACCATCATCTACATACTGTCTCCCTGAATTTGACTATTCCAG	100506003	intergenic							25010.6	228.679	13.6603	7.5556
ASHGA5P046236	126.485	126.485	6.98283	up	noncoding	ENST00000416989	RP11-493K23.1	GENCODE	954	chrX	-	72218439	72222695	ENST00000454388	TCTCTAGAATGAAGTGCCTGGTCCCAGTTCACCATCTAATATTTATGGAAAGCTTATCAG		bidirectional	NM_001042506	PABPC1L2B	polyadenylate-binding protein 1-like 2	+	72223351	72225551	1616.88	7.2528	9.4509	2.46807
ASHGA5P050798	3.44408	3.44408	1.78412	up	noncoding	ENST00000424711	RP11-86H7.1	GENCODE	532	chr1	-	95197688	95208051		GTATTTGCATCCTTCCCTGCTTCAGCCAGGTAAGATCTACTAGCTCAAACTTATCACAGC		intergenic							320.757	72.8086	7.51362	5.7295
ASHGA5P030549	2.46737	2.46737	1.30297	up	noncoding	ENST00000559825	CTD-2184D3.6	GENCODE	874	chr15	+	52408770	52414328		TGTCCAAGTGGCACAGTGACATCATCATCATCCATGAGTCAAACCACCTGTCCTTTTTAG		natural antisense	NM_006578	GNB5	guanine nucleotide-binding protein subunit beta-5 isoform a	-	52413122	52472162	67510.1	19035	15.5404	14.2375
ASHGA5P030549	2.46737	2.46737	1.30297	up	noncoding	ENST00000559825	CTD-2184D3.6	GENCODE	874	chr15	+	52408770	52414328		TGTCCAAGTGGCACAGTGACATCATCATCATCCATGAGTCAAACCACCTGTCCTTTTTAG		natural antisense	NM_016194	GNB5	guanine nucleotide-binding protein subunit beta-5 isoform b	-	52413122	52483565	67510.1	19035	15.5404	14.2375
ASHGA5P054903	15.1385	15.1385	3.92015	up	noncoding	TCONS_00009150	XLOC_004134	LincRNAs identified by Cabili et al	392	chr4	-	157041419	157065044		GTTTCTGTTAATGAGCCAGCCTCTGGGAACCATCACTCTCCTATTGCTTAAGATTTCCAG		intergenic							641.832	31.4791	8.35753	4.43738
ASHGA5P016406	306.088	306.088	8.2578	up	noncoding	ENST00000433217	INTS4L2	pseudogene	1320	chr7	+	65112793	65171347	ENST00000430126, NR_027392, uc003ttw.3	GAGCCCAGGAGCTGCTGGAATTCACCATCAGGCCTTGCAGGAAAAGTCGTGGAATGTAGC									9925.93	20.3474	12.0439	3.78611
ASHGA5P039587	154.257	154.257	7.26919	up	noncoding	ENST00000504050	RP11-125O18.1	GENCODE	645	chr4	-	128018252	128391707		ATCTTCCTCTGATAGTTCTACTTCATTCTGTCAAAGATCCAATTCCCGAAAGAGTTTTTT		intergenic							4143.53	16.5868	10.7524	3.4832
ASHGA5P058309	142.538	142.538	7.15521	up	noncoding	TCONS_00029837	XLOC_014272	LincRNAs identified by Cabili et al	598	chr22	+	47596469	47604411		AAACTGCAAGTCGATAAAGCCCACAGGGAGCAGAGGTTTTCATTACCATCATTCTCAGAG		intergenic							2551.12	10.9361	10.0531	2.89787
ASHGA5P029893	12.303	12.303	3.62094	up	noncoding	TCONS_00008869	XLOC_003646	LincRNAs identified by Cabili et al	580	chr4	+	111288132	111291542		GAAAACCCTTGTAAATCCACCACTGTTAGGCTTAGCCATCATCTCCTTGATGAAGCCTAT		intergenic							4340.94	181.727	10.8238	7.20287
ASHGA5P009672	2.78761	2.78761	1.47903	up	noncoding	ENST00000356555	ZNF300P1	pseudogene	1822	chr5	-	150310324	150325851		GGGTTGAGTCACCTGATTCCTCAGACCTCTGCCCTATCGGAAGGGAAGCAGAAAATGATC									79.7916	30.1808	5.85139	4.37236
ASHGA5P057396	3.39983	3.39983	1.76546	up	noncoding	TCONS_00016706	XLOC_007577	LincRNAs identified by Cabili et al	301	chr9	+	130919331	130921896	TCONS_00016167	TGGAGTCCCAGTAGAGCTGGAGTCCAGCCTGATTCCCACCCACAGGTTGTAACCAATGAG		intergenic							493.811	102.202	8.02935	6.26388
ASHGA5P018530	3.56355	3.56355	1.83332	up	noncoding	NR_038388	LOC729444	RefSeq	3186	chr22	+	20325589	20350461	ENST00000447720, ENST00000451257, ENST00000577456, uc002zuk.4, uc011ahm.1	GGATTTGTAGGACTTTAAAAAGCACTCATGTTTCCATCCTCACTGTTGACTCCTGGCTTA	729444	intergenic							370.002	78.5725	7.68083	5.84751
ASHGA5P039305	14.606	14.606	3.86849	up	noncoding	ENST00000438318	VAV3-AS1	GENCODE	619	chr1	+	108507064	108537229		GCAGCTCCTCAAGTCTGCTAAAGAAAAGTTAAGTAGAATTAATTTTGTTCAATATCTCCC	100873946	intronic antisense	NM_006113	VAV3	guanine nucleotide exchange factor VAV3 isoform 1	-	108113781	108507545	105.864	5	6.18974	2.32125
ASHGA5P039117	20.0392	20.0392	4.32475	up	noncoding	ENST00000467995	RP11-6F2.6	GENCODE	589	chr3	+	156807669	156817618		TCATTTACAGTCCCACTCACCAGCTGTTTTGCTAGAATTTTTGACATGAGAGGCTGGTGG		intergenic							214.861	9.55125	7.03355	2.70879
ASHGA5P029476	252.174	252.174	7.97828	up	noncoding	uc001wpo.1	AK056368	UCSC_knowngene	2097	chr14	+	24912177	24971403		CAATCCATCAACCTGCTTCTCACACACATTAGCTCAGAGTAAAGGACTCATTTTATGGCA		exon sense-overlapping	ENST00000555109	RP11-80A15.1	Uncharacterized protein [Source:UniProtKB/TrEMBL;Acc:G3V3K2]	+	24970799	24977894	14548.1	38.2914	12.7136	4.73531
ASHGA5P045034	10.6046	10.6046	3.40662	up	noncoding	ENST00000524100	RP11-473O4.5	GENCODE	917	chr8	+	130844546	130856750		GCACACTGCATCACCACACTCACTTATCAAGAAAAGGCCAATATTATCTAATATACGTGA		natural antisense	NM_001256763	FAM49B	protein FAM49B	-	130851838	130952118	90910.7	6183.07	16.0761	12.6694
ASHGA5P045034	10.6046	10.6046	3.40662	up	noncoding	ENST00000524100	RP11-473O4.5	GENCODE	917	chr8	+	130844546	130856750		GCACACTGCATCACCACACTCACTTATCAAGAAAAGGCCAATATTATCTAATATACGTGA		natural antisense	NM_016623	FAM49B	protein FAM49B	-	130851838	130952118	90910.7	6183.07	16.0761	12.6694
ASHGA5P057408	7.77511	7.77511	2.95886	up	noncoding	TCONS_00016895	XLOC_007895	LincRNAs identified by Cabili et al	3179	chr9	-	139144132	139148691	TCONS_00016506, TCONS_00016507, TCONS_00016894	GCCTCCCCAGCAGCTCCTGTGGTCCCTGAGGAGGCGGCGCCCCCAATCCTGCACCAGGGC		intergenic							4685.07	295.615	10.9332	7.97435
ASHGA5P027705	33.9492	33.9492	5.0853	up	noncoding	uc001uiu.1	AX748157	UCSC_knowngene	2252	chr12	-	131510105	131512357		TTAAAATGAGCCCTTTGGGAGAATAAGGGATTCCATCCAGCTCAGAAGGGCAGGAGTAAT		intronic antisense	NM_198827	GPR133	probable G-protein coupled receptor 133 precursor	+	131438451	131626008	4634.67	78.1208	10.923	5.83766
ASHGA5P045452	17.4712	17.4712	4.1269	up	noncoding	uc004bmy.3	BC010186	UCSC_knowngene	1201	chr9	-	125578330	125579531		CGTTTGGAATGAAAGTCTCAGGAAGGCACGGACTTTGTTTTCTTCCTCATGTATGGCATA		intron sense-overlapping	ENST00000436632	PDCL	phosducin-like [Source:HGNC Symbol;Acc:8770]	-	125560667	125588965	131.92	5	6.44816	2.32125
ASHGA5P031411	7.79677	7.79677	2.96288	up	noncoding	ENST00000565310	RP11-104N10.1	GENCODE	405	chr16	-	89558810	89560201		TCTCTACTCCATCTGCACTGCTGTCTCTGTGCGTTCATCATCTCACAGCCATCCTTTCAT		intergenic							1479.11	109.461	9.34429	6.38141
ASHGA5P045255	7.57265	7.57265	2.9208	up	noncoding	uc004aen.1	AQP7P1	UCSC_knowngene	771	chr9	-	67254266	67289492	NR_026558, uc004aem.1	TGGAACCACGATGCAGGCTCTAAACTCCTCTACAATCATCCTCCCTTGTGAGAAAAATAC	375719	intergenic							1771.65	129.778	9.57621	6.65541
ASHGA5P020755	636.773	636.773	9.31463	up	noncoding	ENST00000519427	RP11-313C15.1	GENCODE	1722	chr8	+	73644279	73664078		GTGACCCACTCATTCTCTTATGTGGACATCACAATTTACCTGTTCTCCCAGCAGTGGATA		intron sense-overlapping	NM_004770	KCNB2	potassium voltage-gated channel subfamily B member 2	+	73449625	73850584	23689	27.6766	13.554	4.23941
ASHGA5P046301	2.5786	2.5786	1.36659	up	noncoding	ENST00000454625	GS1-421I3.2	GENCODE	772	chrX	-	119144674	119149501		ATGAAGAAATCTAGGTTGTTGGTGTTTTTCTTTGAACACCTCTTCTTGCTCTTCGATAGG		intergenic							215.177	69.98	7.03614	5.66955
ASHGA5P056729	6.75703	6.75703	2.75639	up	noncoding	TCONS_00008111	XLOC_003578	LincRNAs identified by Cabili et al	311	chr4	+	76744127	76746496		ATAATACGAATGCCACAGAGCTGTGGATGAAATGAGCCCATTCCGGTCTGGCTTCTTTAA		intergenic							59.8985	9.83682	5.50412	2.74773
ASHGA5P020647	3.99555	3.99555	1.99839	up	noncoding	ENST00000518593	RP11-705O24.1	GENCODE	469	chr8	+	62737906	62856739	ENST00000517953, ENST00000519452, ENST00000519766, ENST00000519967, ENST00000520097, ENST00000520862, ENST00000523042	CTGAGAATTGTGGATATTCTTCATTATTCCATCATCATCTCAAACCTCTTGGGTATAGTG		intergenic							50857.7	7916.95	15.0216	13.0232
ASHGA5P046319	18.5324	18.5324	4.21198	up	noncoding	TCONS_00001552	XLOC_000895	LincRNAs identified by Cabili et al	528	chr1	-	85063634	85086673		ATATGCCATCCAAGAAGACCAAAAGTACAGCAGGATGATTGTGAACAAGACCAGGGACCT		intergenic							141.254	5	6.53323	2.32125
ASHGA5P031671	10.924	10.924	3.44942	up	noncoding	ENST00000575562	RP11-2C24.6	GENCODE	1704	chr16	+	30789769	30791473		ATGTTTCATTCAAGAGTTTTCTGTCTTCCACCATCTCATAGGGCAACAGTCTCTCCCCAG		natural antisense	NM_001080417	ZNF629	zinc finger protein 629	-	30789769	30798523	2017.75	104.752	9.75784	6.30842
ASHGA5P047604	2.59568	2.59568	1.37611	up	noncoding	TCONS_00014195	XLOC_006210	LincRNAs identified by Cabili et al	463	chr7	+	112258107	112260699	TCONS_00013058, TCONS_00013565, TCONS_00014196	CCATGAAGATTCATTACCTTTTCTTTGCTCTTTTCTTCCTTGGCCAGCTGTCTACCTCAG		intergenic							2813.08	494.206	10.1664	8.79026
ASHGA5P040737	12.2467	12.2467	3.61433	up	noncoding	ENST00000520443	CTC-329D1.3	GENCODE	570	chr5	-	139728068	139737379		TCTGAATGTAGGTCAGCCACACCCCACATATTGAATACCAAGAATCCATCCCCTGAGAAA		intergenic							25081	1089.33	13.6684	10.0541
ASHGA5P048555	2.06137	2.06137	1.0436	up	noncoding	ENST00000424611	HERC2P3	GENCODE	1956	chr15	-	20643949	20658928	ENST00000436934, ENST00000454045, ENST00000530420, ENST00000564334, uc010uan.1, uc010uao.1	TCTGACGTGCCGTTACTCAGAGGTGGGTGGCCGTCTCCCTTCCCTGTACCCTGGTGAAGA	283755	intergenic							1810.86	430.114	9.60557	8.56197
ASHGA5P041118	606.348	606.348	9.244	up	noncoding	TCONS_00022047	XLOC_010648	LincRNAs identified by Cabili et al	306	chr13	-	68155304	68157361		GGGCAAGGAATCAATCTCATTTGCAGCCATCATCATGAATCTGCTATACACTCAGCACAG		intergenic							25249.1	31.3854	13.6777	4.43375
ASHGA5P058033	2.25821	2.25821	1.17518	up	noncoding	TCONS_00025559	XLOC_012388	LincRNAs identified by Cabili et al	591	chr17	-	10690547	10695151		TATAAACCTGTTGTTTTCAAAGGCCCTGCTCACACAGGAATTCATGGCAGAATGGAGCTG		intergenic							15.3075	7.96755	3.69769	2.5225
ASHGA5P032113	3.20759	3.20759	1.68149	up	noncoding	uc021toa.1	GP1BA	UCSC_knowngene	1237	chr17	-	4835898	4837135		CAAAAAAGCCCTTTGGTATTGTATACAGCGAGTTCTCTTGGAGGAGAAGGGTGTCGAGAT		natural antisense	NM_000173	GP1BA	platelet glycoprotein Ib alpha chain precursor	+	4835591	4838325	19.5179	5.65414	4.0389	2.3574
ASHGA5P047730	16.6631	16.6631	4.05858	up	noncoding	ENST00000454857	CASC2	GENCODE	720	chr10	+	119806534	119966501		AGTTTTAGGGCAAGGATTACAAAGCCCTTCCATGCAGATATCCACAGAGAAAGACCCAGA	255082	bidirectional	NM_014904	RAB11FIP2	rab11 family-interacting protein 2	-	119764426	119806114	124.35	5	6.37984	2.32125
ASHGA5P047031	19.3037	19.3037	4.2708	up	noncoding	uc021pwt.1	KCNQ1DN	UCSC_knowngene	61	chr10	-	99836117	99836178		TTTTAAAGAATGTTTTTCCATTCCCTTTTATGTGTTTTGCAGGTTACATCTCATTTCTTT		intergenic							2009.72	62.4963	9.7532	5.4824
ASHGA5P022687	5.29953	5.29953	2.40587	up	noncoding	ENST00000560903	RP11-244F12.3	GENCODE	1410	chr15	-	63339892	63341447		GCTGGCCCAGCTTCCTCTCGTGGTCCAGCTCGCGCTGCAGGGTGCCCGCGCGCTCCTCAG		intronic antisense	NM_000366	TPM1	tropomyosin alpha-1 chain isoform 5	+	63334837	63358292	359.189	53.5857	7.65071	5.24485
ASHGA5P022687	5.29953	5.29953	2.40587	up	noncoding	ENST00000560903	RP11-244F12.3	GENCODE	1410	chr15	-	63339892	63341447		GCTGGCCCAGCTTCCTCTCGTGGTCCAGCTCGCGCTGCAGGGTGCCCGCGCGCTCCTCAG		intronic antisense	NM_001018004	TPM1	tropomyosin alpha-1 chain isoform 3	+	63334837	63364113	359.189	53.5857	7.65071	5.24485
ASHGA5P022687	5.29953	5.29953	2.40587	up	noncoding	ENST00000560903	RP11-244F12.3	GENCODE	1410	chr15	-	63339892	63341447		GCTGGCCCAGCTTCCTCTCGTGGTCCAGCTCGCGCTGCAGGGTGCCCGCGCGCTCCTCAG		intronic antisense	NM_001018005	TPM1	tropomyosin alpha-1 chain isoform 1	+	63334837	63358292	359.189	53.5857	7.65071	5.24485
ASHGA5P022687	5.29953	5.29953	2.40587	up	noncoding	ENST00000560903	RP11-244F12.3	GENCODE	1410	chr15	-	63339892	63341447		GCTGGCCCAGCTTCCTCTCGTGGTCCAGCTCGCGCTGCAGGGTGCCCGCGCGCTCCTCAG		intronic antisense	NM_001018006	TPM1	tropomyosin alpha-1 chain isoform 4	+	63334837	63364113	359.189	53.5857	7.65071	5.24485
ASHGA5P022687	5.29953	5.29953	2.40587	up	noncoding	ENST00000560903	RP11-244F12.3	GENCODE	1410	chr15	-	63339892	63341447		GCTGGCCCAGCTTCCTCTCGTGGTCCAGCTCGCGCTGCAGGGTGCCCGCGCGCTCCTCAG		intronic antisense	NM_001018007	TPM1	tropomyosin alpha-1 chain isoform 2	+	63334837	63364113	359.189	53.5857	7.65071	5.24485
ASHGA5P022687	5.29953	5.29953	2.40587	up	noncoding	ENST00000560903	RP11-244F12.3	GENCODE	1410	chr15	-	63339892	63341447		GCTGGCCCAGCTTCCTCTCGTGGTCCAGCTCGCGCTGCAGGGTGCCCGCGCGCTCCTCAG		intronic antisense	NM_001018020	TPM1	tropomyosin alpha-1 chain isoform 7	+	63334837	63364113	359.189	53.5857	7.65071	5.24485
ASHGA5P022687	5.29953	5.29953	2.40587	up	noncoding	ENST00000560903	RP11-244F12.3	GENCODE	1410	chr15	-	63339892	63341447		GCTGGCCCAGCTTCCTCTCGTGGTCCAGCTCGCGCTGCAGGGTGCCCGCGCGCTCCTCAG		natural antisense	NM_001018008	TPM1	tropomyosin alpha-1 chain isoform 6	+	63340635	63362831	359.189	53.5857	7.65071	5.24485
ASHGA5P014191	3.95288	3.95288	1.98291	up	noncoding	ENST00000578492	RP13-104F24.2	GENCODE	2732	chr17	-	62745780	62777744	ENST00000400873	GACATACCAGCTTTCTCCCTTTGTCTCATAACCATGTCCACCAATGAGAATGCTAATACA		intergenic							1125.38	163.185	8.99897	7.01607
ASHGA5P038337	31.5532	31.5532	4.97971	up	noncoding	TCONS_00023541	XLOC_011374	LincRNAs identified by Cabili et al	756	chr15	+	98083276	98101959		ATTGAGAAGATTGCTGTTCACCATTTTGACAACCACACAAGCCACAGATGATACTCTCAG		intergenic							1527.17	30.9065	9.38676	4.40705
ASHGA5P023726	2.11342	2.11342	1.07958	up	noncoding	HMlincRNA1607+	HMlincRNA1607	LincRNAs identified by Khalil et al	4938	chrX	+	44348754	44353692		CTTTGCTTTCCTTCTATTTTTGTTCTCAGGTATGTGTATGACATGGAAAGTGGAGATGAG		intergenic							30.2235	17.3848	4.63014	3.55056
ASHGA5P047150	35.7292	35.7292	5.15903	up	noncoding	TCONS_00014899	XLOC_006972	LincRNAs identified by Cabili et al	358	chr8	-	1236402	1237027		ACCAGTTCCCCTAATAGAACCATGTACACACACAACACTGAGTTGAACAAATGAAGCAGC		intergenic							12750.2	195.88	12.4772	7.3182
ASHGA5P029273	17.4252	17.4252	4.1231	up	noncoding	ENST00000554211	RP11-799P8.1	GENCODE	1187	chr14	-	82071690	82089405		GCATGGCTTCTTCCTGTCTGAAATTATTACTACTTAGGGTTTTTCACGTGTTATTTCATT		intergenic							272.833	13.5281	7.31872	3.19562
ASHGA5P044904	32.8763	32.8763	5.03898	up	noncoding	ENST00000534675	RP11-354A14.1	GENCODE	466	chr8	+	82797611	82835428		TCCTCTCTTCTTCTTTGTGTTTTTCACCCTGAAGTGTACAAAGTCAAATGAATTTCCTAG		intergenic							14355.8	243.228	12.6964	7.6574
ASHGA5P015422	23.7175	23.7175	4.56788	up	noncoding	ENST00000420143	ANKRD20A19P	GENCODE	641	chr13	-	24515107	24520363		CGGATTCTAGGAGCCGGTGGTTGGGGGTCTGAGAAGTCACCACCACCAAGAAGTTCTTCG		intergenic							1040.4	29.5234	8.90671	4.33883
ASHGA5P039067	68.1202	68.1202	6.09001	up	noncoding	TCONS_00023594	XLOC_011407	LincRNAs identified by Cabili et al	644	chr15	-	26696897	26704712		ATCATCACCAAAAATGCACACGAAACTGCCACTAGAAGCAAATGGAGGAAGCACACAGCA		intergenic							28668.8	270.576	13.9207	7.83067
ASHGA5P044622	19.6521	19.6521	4.29661	up	noncoding	TCONS_00001220	XLOC_000493	LincRNAs identified by Cabili et al	471	chr1	+	184746599	184748797		GAACCTTTGTTACTGCCACATTGAGAGCTGGATATCTATTTATCATCACCTACCACCCTC		intergenic							18678.3	504.628	13.1215	8.82488
ASHGA5P023696	2.63587	2.63587	1.39828	up	noncoding	HMlincRNA1546+	HMlincRNA1546	LincRNAs identified by Khalil et al	917	chr15	+	74197716	74198633		TTTGTCTCCATAAATTTATACTCTCCACTGCCTTCCCAGGAAGCTGAGTTCTGGTCACAG		intergenic							133.629	47.5363	6.46432	5.06604
ASHGA5P048185	8.55459	8.55459	3.0967	up	noncoding	ENST00000545308	SNHG1	GENCODE	646	chr11	-	62621913	62622960		TATGAATAAGCTTCATTCCATCCTAATACCTTAAAATAACTAATTTGCTTTCCTTTCCAG	23642	bidirectional	NM_001012662	SLC3A2	4F2 cell-surface antigen heavy chain isoform b	+	62623483	62656355	178.066	19.313	6.80235	3.70565
ASHGA5P048185	8.55459	8.55459	3.0967	up	noncoding	ENST00000545308	SNHG1	GENCODE	646	chr11	-	62621913	62622960		TATGAATAAGCTTCATTCCATCCTAATACCTTAAAATAACTAATTTGCTTTCCTTTCCAG	23642	bidirectional	NM_001012664	SLC3A2	4F2 cell-surface antigen heavy chain isoform e	+	62623483	62656355	178.066	19.313	6.80235	3.70565
ASHGA5P048185	8.55459	8.55459	3.0967	up	noncoding	ENST00000545308	SNHG1	GENCODE	646	chr11	-	62621913	62622960		TATGAATAAGCTTCATTCCATCCTAATACCTTAAAATAACTAATTTGCTTTCCTTTCCAG	23642	bidirectional	NM_002394	SLC3A2	4F2 cell-surface antigen heavy chain isoform c	+	62623483	62656355	178.066	19.313	6.80235	3.70565
ASHGA5P054399	21.6302	21.6302	4.43498	up	noncoding	ENST00000458682	LINC00202	GENCODE	868	chr10	-	27220134	27223852		TTGAAAATTCTTTGCTCACTCTTCTTTTCTCACTTCCTCCCTCTCAGGACCTATAAAAGG	387644	intergenic							45204	1343.59	14.7855	10.3505
ASHGA5P032752	2.14489	2.14489	1.1009	up	noncoding	ENST00000572287	AC099684.1	GENCODE	539	chr17	+	1921009	1922396		ATTCTAGTGATGGACACCAAGTCAGCGGGCTCCTCTCTCCAGTTCCTCGACATCCCTGGA		intronic antisense	NM_178568	RTN4RL1	reticulon-4 receptor-like 1 precursor	-	1837970	1928178	1797.49	412.227	9.59567	8.49477
ASHGA5P029668	2.84601	2.84601	1.50894	up	noncoding	ENST00000553732	RP11-270M14.5	GENCODE	580	chr14	+	76437266	76437930		TAAGGGACCTGAGGTTCATTCTGAAATGCTTATCTGAAGGGTCCACCTACCTCTTCTCAA		natural antisense	NM_003239	TGFB3	transforming growth factor beta-3 preproprotein	-	76424441	76448092	16.7917	5	3.83019	2.32125
ASHGA5P021119	14.205	14.205	3.82832	up	noncoding	uc002ecm.4	KIAA0664L3	UCSC_knowngene	1433	chr16	+	31711933	31718745		CCGCGAGATGAGCCACCATCACTCATGTTCTTGAATGGGAACTGCCTGGAGACCCTGAAG	100132341	intergenic							26229.1	989.057	13.7446	9.91633
ASHGA5P032175	4.27419	4.27419	2.09565	up	noncoding	ENST00000580310	AC002347.2	GENCODE	2279	chr17	-	10705102	10707381		ACACTTTGCATCAGGAAACTTCAGAGCAAAAAGGGTCCCTGATTTGTGTGCTGGTATGTT		intergenic							26.0474	5	4.4169	2.32125
ASHGA5P037571	5.0276	5.0276	2.32987	up	noncoding	uc010gsl.3	PI4KAP1	UCSC_knowngene	1923	chr22	-	20387885	20427815	ENST00000467443, ENST00000479693, ENST00000480319, uc010gsj.2, uc010gsk.2	TCTACCCACACCCTGCTCTCCTCAGTCATCCTTTGTTAAGGGTTAAAACCAGGGCACCTG	728233	intergenic							53088.4	6599.77	15.1032	12.7733
ASHGA5P029058	2.88408	2.88408	1.52811	up	noncoding	ENST00000508469	CTD-2251F13.1	GENCODE	922	chr14	-	30637039	30766249		AAATGGCTTTCTCTTCATTCATTTCTACATCTTCATTCATTCTCCCAGGTCTTGCAATGG		intron sense-overlapping	ENST00000549503	PRKD1	protein kinase D1 [Source:HGNC Symbol;Acc:9407]	-	30133017	30661104	127.851	42.2257	6.41031	4.8822
ASHGA5P049563	2.93383	2.93383	1.55278	up	noncoding	TCONS_00016544	XLOC_007304	LincRNAs identified by Cabili et al	902	chr9	+	24545421	24552156		TAACTTCCATATTTGGAATAAGCTATAAAAGGTGTGGAATCTCCATTCTTTCAATCCGCA		natural antisense	ENST00000412335	IZUMO3	IZUMO family member 3 [Source:HGNC Symbol;Acc:31421]	-	24542957	24545909	17.3249	5	3.87404	2.32125
ASHGA5P049563	2.93383	2.93383	1.55278	up	noncoding	TCONS_00016544	XLOC_007304	LincRNAs identified by Cabili et al	902	chr9	+	24545421	24552156		TAACTTCCATATTTGGAATAAGCTATAAAAGGTGTGGAATCTCCATTCTTTCAATCCGCA		natural antisense	ENST00000418122	IZUMO3	IZUMO family member 3 [Source:HGNC Symbol;Acc:31421]	-	24543304	24545944	17.3249	5	3.87404	2.32125
ASHGA5P049563	2.93383	2.93383	1.55278	up	noncoding	TCONS_00016544	XLOC_007304	LincRNAs identified by Cabili et al	902	chr9	+	24545421	24552156		TAACTTCCATATTTGGAATAAGCTATAAAAGGTGTGGAATCTCCATTCTTTCAATCCGCA		natural antisense	ENST00000543880	IZUMO3	IZUMO family member 3 [Source:HGNC Symbol;Acc:31421]	-	24543226	24545647	17.3249	5	3.87404	2.32125
ASHGA5P036403	6.92674	6.92674	2.79218	up	noncoding	uc002vea.3	BC130595	UCSC_knowngene	1287	chr2	+	211097415	211098702		TCTGTCCATTCCCACTACCAGAAAGAAACTCTGTGTTAGTTTTTCTTTTACCTTTATTGA		intergenic							11804.2	787.01	12.342	9.54978
ASHGA5P038124	9.05857	9.05857	3.17928	up	noncoding	ENST00000422657	AC090957.2	GENCODE	1147	chr3	-	14806458	14808947		ATCTAAAGGTGAACATTTATTCTTTCCCCCAAACCATCCCGTAGCAACTGAGCCTGCTGA		intronic antisense	NM_001184957	C3orf20	uncharacterized protein C3orf20 isoform 2	+	14716605	14814543	994.087	70.0162	8.84995	5.67067
ASHGA5P038124	9.05857	9.05857	3.17928	up	noncoding	ENST00000422657	AC090957.2	GENCODE	1147	chr3	-	14806458	14808947		ATCTAAAGGTGAACATTTATTCTTTCCCCCAAACCATCCCGTAGCAACTGAGCCTGCTGA		intronic antisense	NM_001184958	C3orf20	uncharacterized protein C3orf20 isoform 2	+	14716605	14814543	994.087	70.0162	8.84995	5.67067
ASHGA5P038124	9.05857	9.05857	3.17928	up	noncoding	ENST00000422657	AC090957.2	GENCODE	1147	chr3	-	14806458	14808947		ATCTAAAGGTGAACATTTATTCTTTCCCCCAAACCATCCCGTAGCAACTGAGCCTGCTGA		intronic antisense	NM_032137	C3orf20	uncharacterized protein C3orf20 isoform 1	+	14716605	14814543	994.087	70.0162	8.84995	5.67067
ASHGA5P017696	9.28485	9.28485	3.21488	up	noncoding	ENST00000444809	ZNF733P	pseudogene	1573	chr7	-	62751895	62764366	NM_033273	TAAAGAGAAATGAGATGGTAGCCAAACGCCCACAGTTACGCATTCCCATTTCACCCAAGA									178.27	17.8176	6.80413	3.58925
ASHGA5P043660	102.976	102.976	6.68617	up	noncoding	TCONS_00018115	XLOC_008375	LincRNAs identified by Cabili et al	413	chr10	+	7115610	7118468		CCTTCCTTCACTATGTGCATACAACCTCCAGGAAAATAAAATAAAATAGTGTAAGAGTGA		intergenic							11230.6	65.8391	12.2553	5.5691
ASHGA5P033512	3.40349	3.40349	1.76702	up	noncoding	ENST00000579467	RP11-143J12.3	GENCODE	544	chr18	-	9112401	9115875		AGTTCTTTCCCTGTCTTACTATCACCACTATTTCAGACATTATTTCATGTCTGTGCATTA		intronic antisense	NM_021074	NDUFV2	NADH dehydrogenase [ubiquinone] flavoprotein 2, mitochondrial precursor	+	9102627	9134343	979.593	168.264	8.8386	7.07158
ASHGA5P019021	5.55751	5.55751	2.47444	up	noncoding	ENST00000464823	RP11-631B21.1	GENCODE	586	chr3	-	107572726	107596915		TCTGGAAAAGACTAATCTTTCCAAGTTCATCTGAGGCTCCTCTTCTCCATGACAACCTCA		intergenic							1155.82	122.708	9.0343	6.55986
ASHGA5P032603	2.18862	2.18862	1.13002	up	noncoding	ENST00000582201	PLEKHM1P	pseudogene	3166	chr17	-	62781376	62825326	ENST00000578036, ENST00000582986, NM_014798, NR_027774, NR_027782, uc002jev.3	AGATGAGGTATATGAAGGATTCCTCAAGGCCCTGATTGAATTTGCCTCCCAGCATGTCTA	440456								24.2556	13.4836	4.32181	3.19179
ASHGA5P045881	670.713	670.713	9.38955	up	noncoding	ENST00000425157	RP11-436F21.3	GENCODE	202	chr9	+	106006007	106015452		ATGAAGACAAAAGTGCTGACTGCATATTTTCAGAATTTCAGTCACCATCAACTTCTCCTG		intergenic							7976.06	5	11.7108	2.32125
ASHGA5P038056	18.5215	18.5215	4.21113	up	noncoding	ENST00000445039	RP4-784A16.5	GENCODE	326	chr1	+	53793920	53802890	uc001cvn.1	GTCTTCCTCATCTTTGTCTTCAGAGGATAAATACAAGGCCTGACACATAACAAGCATGAG		bidirectional	NM_001018054	LRP8	low-density lipoprotein receptor-related protein 8 isoform 4 precursor	-	53708040	53793821	9505.09	260.922	11.9818	7.77071
ASHGA5P038056	18.5215	18.5215	4.21113	up	noncoding	ENST00000445039	RP4-784A16.5	GENCODE	326	chr1	+	53793920	53802890	uc001cvn.1	GTCTTCCTCATCTTTGTCTTCAGAGGATAAATACAAGGCCTGACACATAACAAGCATGAG		bidirectional	NM_004631	LRP8	low-density lipoprotein receptor-related protein 8 isoform 1 precursor	-	53708040	53793821	9505.09	260.922	11.9818	7.77071
ASHGA5P038056	18.5215	18.5215	4.21113	up	noncoding	ENST00000445039	RP4-784A16.5	GENCODE	326	chr1	+	53793920	53802890	uc001cvn.1	GTCTTCCTCATCTTTGTCTTCAGAGGATAAATACAAGGCCTGACACATAACAAGCATGAG		bidirectional	NM_017522	LRP8	low-density lipoprotein receptor-related protein 8 isoform 3 precursor	-	53708040	53793821	9505.09	260.922	11.9818	7.77071
ASHGA5P038056	18.5215	18.5215	4.21113	up	noncoding	ENST00000445039	RP4-784A16.5	GENCODE	326	chr1	+	53793920	53802890	uc001cvn.1	GTCTTCCTCATCTTTGTCTTCAGAGGATAAATACAAGGCCTGACACATAACAAGCATGAG		bidirectional	NM_033300	LRP8	low-density lipoprotein receptor-related protein 8 isoform 2 precursor	-	53708040	53793821	9505.09	260.922	11.9818	7.77071
ASHGA5P031196	3.74134	3.74134	1.90356	up	noncoding	ENST00000569778	RP11-249C24.10	GENCODE	444	chr16	-	56643412	56645287		CCAGTTCAATCCCTCACCCCAGTCCGTTATTTTTAAGGCATATAAAGGAAACCAGAGACA		intergenic							1756.82	242.84	9.559	7.65544
ASHGA5P015685	109.657	109.657	6.77686	up	noncoding	ENST00000422548	RP5-968D22.1	GENCODE	389	chr1	-	168370720	168376512		TACTTTCAAGGACTTATAGGAGCAGAAATCAGAAGACTTTACTCCACACACTTCAGGTGG		intergenic							5880.17	32.4911	11.2618	4.48495
ASHGA5P020629	2.73167	2.73167	1.44978	up	noncoding	ENST00000517731	RP11-1049H7.2	GENCODE	412	chr8	+	1981649	1983729		TTGACGTCAGGTCTTTGTGGACTCAGTGGGAACTGAGAACAATTCCATCCGTACGACGTC		intergenic							31.8752	14.0667	4.6965	3.24672
ASHGA5P017266	9.04024	9.04024	3.17636	up	noncoding	ENST00000439473	DPY19L2P2	GENCODE	3994	chr7	-	102815579	102920666		TTGATTCTCAGATTAGGTGATGGAAGCTGCCCATTCTTCATCACCCCTTGCTACTCATTC	349152	intergenic							2056.35	125.328	9.77903	6.60266
ASHGA5P056530	46.197	46.197	5.52973	up	noncoding	TCONS_00005675	XLOC_002943	LincRNAs identified by Cabili et al	657	chr3	+	182200734	182206014		TGGAAAATACGTCTCGGTATTTGGAAGACCACCCAAAAACAACAGGAAGCATGCTTTTTG		intergenic							725.074	11.4526	8.48809	2.95837
ASHGA5P044543	8.03485	8.03485	3.00627	up	noncoding	ENST00000520457	HPYR1	GENCODE	982	chr8	-	133572744	133573726		TATTTTGGAATTGTCACCACACTATCCTCTGAGCCACCACTCTTCTCGGGAGGTTAAAGT	93668	intergenic							49344.7	3810.38	14.9638	11.9575
ASHGA5P037169	134.162	134.162	7.06783	up	noncoding	NR_033370	LOC63930	RefSeq	3366	chr20	+	61640734	61716423		TTCACTGAGGGGTTCGTCATCACCAAGCCTCAGCCAGAGATGTTAAACTGGAAAAACAAT	63930	intergenic							29452	153.204	13.9772	6.90932
ASHGA5P035972	117.848	117.848	6.88078	up	noncoding	ENST00000455121	AC105053.4	GENCODE	783	chr2	+	86116402	86118103		GAATCACAAGACATCTGTTAAGCCCTTACTACCTCATTCACTCCACTCACATTAGGTTGA		bidirectional	NM_003896	ST3GAL5	lactosylceramide alpha-2,3-sialyltransferase isoform 1	-	86066270	86116157	43922	269.443	14.7053	7.82455
ASHGA5P029866	2.17241	2.17241	1.1193	up	noncoding	ENST00000558398	HERC2P2	GENCODE	578	chr15	-	23285219	23293417		CGGCCCAATTTTCCAAAGTCACCATCACCCCAGGAAAATACCAAACCTAGGTTTAAAAAT		intergenic							58593.2	18124.1	15.2893	14.17
ASHGA5P039254	10.6529	10.6529	3.41317	up	noncoding	ENST00000415451	AC091633.3	GENCODE	439	chr3	+	195273418	195274285		GGTCTGAGGACTCCGCTTTCTTCACTGCCCATTCATCTTCATACTGTTCTCATATTTTTT		intergenic							3474.22	169.256	10.4949	7.0817
ASHGA5P045466	3.37314	3.37314	1.75409	up	noncoding	TCONS_00001990	XLOC_000153	LincRNAs identified by Cabili et al	726	chr1	+	39512711	39514128		TCAAAATACAGCAAAGAGCTCATCATTTCTCAGCTCCTGTCGGAAGCAACAGTGGCTGTT		intergenic							35.5677	12.4903	4.83908	3.08499
ASHGA5P023658	3.08385	3.08385	1.62473	up	noncoding	HMlincRNA1314+	HMlincRNA1314	LincRNAs identified by Khalil et al	18405	chr3	+	65301806	65320211		TCCCTCTGACAACCAGCCATCCTTCATCAATTTCCATAGTAATCATGGCTATTTATTCAG		intergenic							12132.5	1742.88	12.3879	10.7632
ASHGA5P031230	7.98119	7.98119	2.9966	up	noncoding	TCONS_00006148	XLOC_002749	LincRNAs identified by Cabili et al	3023	chr3	+	107853893	107857879		TATCCATGCATAAGTTTTAAAACCCAGCAGCTTCATGGTTTCCTCCTTCTGTTGGCCTGG		intergenic							352.595	35.8909	7.62865	4.63204
ASHGA5P058432	22.2326	22.2326	4.47461	up	noncoding	uc003mto.3	BC087858	UCSC_knowngene	1324	chr6	+	1496349	1519556		CATCAGATATACTCTATCTCAGAAGCAAAAAGCCATCCATGAACAAAGACCTGGGACCAA		intergenic							177.145	5	6.79586	2.32125
ASHGA5P047739	9.88443	9.88443	3.30516	up	noncoding	uc001lfe.1	AX747838	UCSC_knowngene	982	chr10	+	122666806	122667788		TATGCAGGTTAAGTTTCTCCTCTCTTATCATTCATCTTCCAATCTTCAGTTGAGTGTAGG		intron sense-overlapping	NM_018117	WDR11	WD repeat-containing protein 11	+	122610686	122669038	203.084	18.7633	6.96809	3.66293
ASHGA5P021558	5.02388	5.02388	2.3288	up	noncoding	NR_028473	TMEM138	RefSeq	1751	chr11	+	61129472	61136975		TCCCTCAGTGTTCCTGCTGCTGTCCTATGACCTCTTTGTCAATTCCTTCTCAGAACTGCT	51524	exon sense-overlapping	NM_016464	TMEM138	transmembrane protein 138	+	61129472	61136975	1528.62	166.835	9.38838	7.05958
ASHGA5P021558	5.02388	5.02388	2.3288	up	noncoding	NR_028473	TMEM138	RefSeq	1751	chr11	+	61129472	61136975		TCCCTCAGTGTTCCTGCTGCTGTCCTATGACCTCTTTGTCAATTCCTTCTCAGAACTGCT	51524	natural antisense	NM_001161454	CYBASC3	cytochrome b ascorbate-dependent protein 3 isoform 1	-	61116219	61129755	1528.62	166.835	9.38838	7.05958
ASHGA5P021558	5.02388	5.02388	2.3288	up	noncoding	NR_028473	TMEM138	RefSeq	1751	chr11	+	61129472	61136975		TCCCTCAGTGTTCCTGCTGCTGTCCTATGACCTCTTTGTCAATTCCTTCTCAGAACTGCT	51524	natural antisense	NM_153611	CYBASC3	cytochrome b ascorbate-dependent protein 3 isoform 2	-	61116219	61129755	1528.62	166.835	9.38838	7.05958
ASHGA5P042009	3.49132	3.49132	1.80377	up	noncoding	AL042013		LincRNAs identified by Khalil et al	824	chr14	+	60649741	60650565		GGAGGGAAGAACCAGCTCCACGAGCACTAGTAACTAGATGAGCTACATGAGCACTAGACA		intergenic							24.6736	8.21355	4.34256	2.53879
ASHGA5P036207	2.62253	2.62253	1.39096	up	noncoding	NR_038850	CCDC148-AS1	RefSeq	812	chr2	+	159023161	159092681		GAGTGATACGACTCAGGGAGAAGATATCCAGCACTAAAGTATTAATGCCTTTTATTATAA	554201	natural antisense	NM_138803	CCDC148	coiled-coil domain-containing protein 148 isoform 1	-	159027868	159313265	15.449	5	3.71221	2.32125
ASHGA5P020641	24.4118	24.4118	4.60951	up	noncoding	ENST00000517897	RP11-150O12.2	GENCODE	169	chr8	+	37337606	37338327		CTCACTCTCACCATGTCAACAGGACTTCTATGGAAATATGCGTATGATGAGAAGCAGATC		intergenic							202.316	5.58811	6.96352	2.35401
ASHGA5P057303	2.54698	2.54698	1.34879	up	noncoding	TCONS_00015920	XLOC_007283	LincRNAs identified by Cabili et al	1381	chr9	+	12738518	12770158		AGTCTTACAGGCCTTCTGAAAAGAAGTTCTACTCATCCTTCCAAGCCTATAGAACCAAGG		intergenic							33.7029	15.891	4.76942	3.42063
ASHGA5P000401	4.66819	4.66819	2.22286	up	noncoding	chr3:45182150-45196400-	chr3:45182150-45196400	LincRNAs identified by Khalil et al	14250	chr3	-	45207146	45221396		CCAAGGCCAGCCAGTTATCTTGGGGAGAGAAACTAGGTCATGTTTTCTTCCAAACATCTT		intergenic							28.4331	5	4.54411	2.32125
ASHGA5P031008	3229.09	3229.09	11.6569	up	noncoding	ENST00000448643	RP11-479J7.1	GENCODE	810	chr1	-	166356963	166421869		ATGCCACCCAAAACTTGTCTGATTGAGAACATGACAAAAGAACACTGAAGAGATAAATAA		intergenic							76892.9	25.2919	15.7603	4.10335
ASHGA5P030116	7.59905	7.59905	2.92582	up	noncoding	ENST00000559495	RP11-809H16.4	GENCODE	872	chr15	-	69329888	69335905		TTCTGAAGCTTTTTCTGACCTCCCAAAGACAAAGGGTTTAATACCTCCAGCAACACAGCC		intronic antisense	NM_001184779	NOX5	NADPH oxidase 5 isoform 2	+	69307033	69349501	4094.6	267.139	10.7337	7.80785
ASHGA5P030116	7.59905	7.59905	2.92582	up	noncoding	ENST00000559495	RP11-809H16.4	GENCODE	872	chr15	-	69329888	69335905		TTCTGAAGCTTTTTCTGACCTCCCAAAGACAAAGGGTTTAATACCTCCAGCAACACAGCC		intronic antisense	NM_001184780	NOX5	NADPH oxidase 5 isoform 3	+	69222838	69349501	4094.6	267.139	10.7337	7.80785
ASHGA5P030116	7.59905	7.59905	2.92582	up	noncoding	ENST00000559495	RP11-809H16.4	GENCODE	872	chr15	-	69329888	69335905		TTCTGAAGCTTTTTCTGACCTCCCAAAGACAAAGGGTTTAATACCTCCAGCAACACAGCC		intronic antisense	NM_024505	NOX5	NADPH oxidase 5 isoform 1	+	69307033	69349501	4094.6	267.139	10.7337	7.80785
ASHGA5P052463	9.52878	9.52878	3.25229	up	noncoding	uc003lrn.1	PDGF	UCSC_knowngene	876	chr5	-	149492803	149493679		TAATATTAAACCTGGTGCTTCTCACTCACAGACTTTGTGGTCTCTCTCGGGTTTGGGTTC		exon sense-overlapping	NM_002609	PDGFRB	platelet-derived growth factor receptor beta precursor	-	149493401	149535422	250.711	22.9606	7.21411	3.96181
ASHGA5P052463	9.52878	9.52878	3.25229	up	noncoding	uc003lrn.1	PDGF	UCSC_knowngene	876	chr5	-	149492803	149493679		TAATATTAAACCTGGTGCTTCTCACTCACAGACTTTGTGGTCTCTCTCGGGTTTGGGTTC		exon sense-overlapping	NM_005211	CSF1R	macrophage colony-stimulating factor 1 receptor precursor	-	149432853	149492935	250.711	22.9606	7.21411	3.96181
ASHGA5P016837	28.2742	28.2742	4.82141	up	noncoding	ENST00000434839	XIST	GENCODE	720	chrX	-	73040485	73046290		CTTTGAGCTTAGTTTCTGGCATCACTACCACTACTGATTAAACAAGAATAAGAGAACATT	7503	intergenic							5946.45	115.078	11.2771	6.45564
ASHGA5P041213	10.198	10.198	3.35021	up	noncoding	ENST00000507653	CTC-493L21.2	GENCODE	482	chr5	+	86093501	86096097		CTTTGTCTTTTTCTGCTTCACTTCCTCATTCCCTTGGGAGGAGAAGGATCTAACTGATTG		intergenic							3546.59	178.669	10.5229	7.17271
ASHGA5P057026	28.7533	28.7533	4.84565	up	noncoding	TCONS_00012067	XLOC_005595	LincRNAs identified by Cabili et al	2912	chr6	-	6694899	6700867	TCONS_00011442	AACTGCTCTGCATCTGCCTGGATGTCTGCCAAGATCTTCTTCTTTCCACCAATGACCCCT		intergenic							4538.53	89.057	10.8891	6.04349
ASHGA5P022110	9.68598	9.68598	3.2759	up	noncoding	ENST00000549364	RP11-804F13.1	GENCODE	342	chr12	-	38938129	38940279		AAACATACAGCTCCATCTAGCTCTAAGTGCTTTTGTCTCTGCTCTCAATTGTCAGACATT		intergenic							813.636	57.1923	8.6259	5.35
ASHGA5P041752	5.83278	5.83278	2.54418	up	noncoding	ENST00000426882	HCG18	GENCODE	4862	chr6	-	30258782	30294927	ENST00000413358, ENST00000444126, ENST00000449544, ENST00000454129	TTTCTCCATTCTAAAGCCCATAAAGCAATGTTAATTGTTCCCACCCCTCTGCTATTCTGT	414777	natural antisense	NM_021253	TRIM39	tripartite motif-containing protein 39 isoform 1	+	30294620	30311506	9595.9	740.686	11.9951	9.4509
ASHGA5P031078	64.5903	64.5903	6.01325	up	noncoding	ENST00000457405	RP1-10C16.1	GENCODE	418	chr1	-	168732602	168743728		CATTCATTCACCATTGATGTATTTGTGAAGGTGTTCTCTCTAAATAAACTATTGGGACCT		intergenic							627.699	5	8.3345	2.32125
ASHGA5P025729	58.119	58.119	5.86094	up	noncoding	NR_028436	UBE2L3	RefSeq	3137	chr22	+	21921835	21978323		GACTTTAGCCACCCACAAGTACAGAAAATAATCCAGTCCCTCATAGCACTGGTGAATGAC	7332	exon sense-overlapping	NM_001256355	UBE2L3	ubiquitin-conjugating enzyme E2 L3 isoform 4	+	21903735	21978323	22126.6	231.017	13.4339	7.57295
ASHGA5P025729	58.119	58.119	5.86094	up	noncoding	NR_028436	UBE2L3	RefSeq	3137	chr22	+	21921835	21978323		GACTTTAGCCACCCACAAGTACAGAAAATAATCCAGTCCCTCATAGCACTGGTGAATGAC	7332	exon sense-overlapping	NM_001256356	UBE2L3	ubiquitin-conjugating enzyme E2 L3 isoform 3	+	21921835	21978323	22126.6	231.017	13.4339	7.57295
ASHGA5P025729	58.119	58.119	5.86094	up	noncoding	NR_028436	UBE2L3	RefSeq	3137	chr22	+	21921835	21978323		GACTTTAGCCACCCACAAGTACAGAAAATAATCCAGTCCCTCATAGCACTGGTGAATGAC	7332	exon sense-overlapping	NM_003347	UBE2L3	ubiquitin-conjugating enzyme E2 L3 isoform 1	+	21921835	21978323	22126.6	231.017	13.4339	7.57295
ASHGA5P049823	20.4035	20.4035	4.35074	up	noncoding	ENST00000420427	AC004562.1	GENCODE	665	chr17	+	67957902	67979679		TTTTCTTCCTTCCATGATATAGATATATTGATCATGAGGAGAGGGCTCACCCCTCACCCG		intergenic							5062.97	132.701	11.0452	6.69448
ASHGA5P040430	45.6164	45.6164	5.51148	up	noncoding	ENST00000503452	RP11-53O19.1	GENCODE	738	chr5	-	44745001	44808879		AATTTTTTATATATAATTGACAAAATGAAGAAACTTAACACCATCCTAGATTTTAGCTGC		bidirectional	NM_016640	MRPS30	28S ribosomal protein S30, mitochondrial	+	44809026	44815618	421.305	5	7.83273	2.32125
ASHGA5P016533	2.00447	2.00447	1.00322	up	noncoding	ENST00000431401	RP1-290I10.5	GENCODE	256	chr6	-	10474732	10478735		CTCCCATCAGAGTTCAAACATTGAATTAGTTGTGCAATGGAAGGAGTATTACCAGGACCC		intergenic							14.6294	9.07542	3.63711	2.63388
ASHGA5P018229	5.27752	5.27752	2.39986	up	noncoding	ENST00000450920	SRGAP3-AS2	GENCODE	1189	chr3	+	9234218	9236137		ACCAGTCCAGGTGGCGAGGAGTCCATGTCAGCTGCCGTCATCCACACCACAGATCAGACA	100507660	intronic antisense	NM_001033117	SRGAP3	SLIT-ROBO Rho GTPase-activating protein 3 isoform b	-	9022275	9291369	6267.41	543.325	11.3484	8.94859
ASHGA5P018229	5.27752	5.27752	2.39986	up	noncoding	ENST00000450920	SRGAP3-AS2	GENCODE	1189	chr3	+	9234218	9236137		ACCAGTCCAGGTGGCGAGGAGTCCATGTCAGCTGCCGTCATCCACACCACAGATCAGACA	100507660	intronic antisense	NM_014850	SRGAP3	SLIT-ROBO Rho GTPase-activating protein 3 isoform a	-	9022275	9291369	6267.41	543.325	11.3484	8.94859
ASHGA5P054974	13.6061	13.6061	3.76618	up	noncoding	TCONS_00010239	XLOC_004700	LincRNAs identified by Cabili et al	1175	chr5	-	1045830	1047475		CTCACACACTAACCCACTCATTCACACACTAACCCACTCGTTCACACACCCATTCACACT		intergenic							160300	8481.31	16.8877	13.1215
ASHGA5P034297	3.46987	3.46987	1.79488	up	noncoding	ENST00000562112	NAPSB	pseudogene	1266	chr19	-	50837133	50848018	ENST00000531692	GCAGTCTCACTCCTCATTGGGGGGGTCTGGTTTAATCTCACGGCCCAGGATTACGTCATC	256236								252.887	60.1125	7.22482	5.42994
ASHGA5P016106	3.28444	3.28444	1.71565	up	noncoding	NR_024053	HCG18	RefSeq	6600	chr6	-	30255173	30294927	ENST00000426882	CAAGGATTAGAGCTCCCTCTTTGCCCACTAGCAGGGCATTAGCTGGTGCTGAAGACAGTG	414777	natural antisense	NM_021253	TRIM39	tripartite motif-containing protein 39 isoform 1	+	30294620	30311506	72.057	23.9624	5.73765	4.02201
ASHGA5P026721	82.3179	82.3179	6.36313	up	noncoding	ENST00000562245	RP11-660M18.2	GENCODE	774	chr11	+	89984399	90648220		CCCTTAATACTACAGCATGATCCAAAGCATCACCAAAGTCTTCAAAGAGAAAGTAAAAAA		intergenic							849.787	5	8.68439	2.32125
ASHGA5P045475	34.9841	34.9841	5.12863	up	noncoding	ENST00000425370	RP11-123K19.1	GENCODE	506	chr9	-	129370556	129375978		GGCTGAAACATAAGTGCTCACCACAACACCCAGCACCTACCAGGCCTCTATACATATTTG		bidirectional	NM_001174146	LMX1B	LIM homeobox transcription factor 1-beta isoform 3	+	129376721	129463311	14975.1	241.007	12.768	7.63939
ASHGA5P045475	34.9841	34.9841	5.12863	up	noncoding	ENST00000425370	RP11-123K19.1	GENCODE	506	chr9	-	129370556	129375978		GGCTGAAACATAAGTGCTCACCACAACACCCAGCACCTACCAGGCCTCTATACATATTTG		bidirectional	NM_001174147	LMX1B	LIM homeobox transcription factor 1-beta isoform 2	+	129376721	129463311	14975.1	241.007	12.768	7.63939
ASHGA5P045475	34.9841	34.9841	5.12863	up	noncoding	ENST00000425370	RP11-123K19.1	GENCODE	506	chr9	-	129370556	129375978		GGCTGAAACATAAGTGCTCACCACAACACCCAGCACCTACCAGGCCTCTATACATATTTG		bidirectional	NM_002316	LMX1B	LIM homeobox transcription factor 1-beta isoform 1	+	129376721	129463311	14975.1	241.007	12.768	7.63939
ASHGA5P032440	26.9487	26.9487	4.75214	up	noncoding	TCONS_00029702	XLOC_014378	LincRNAs identified by Cabili et al	1555	chr22	-	39608718	39610817		TAGGCTTCTTGACACAGAGTAGTCAAGCCACTCCCTTGCTCATAACCTTCTATGACTTCT		intergenic							9798.54	190.439	12.0245	7.27237
ASHGA5P045581	2.45134	2.45134	1.29357	up	noncoding	TCONS_00001801	XLOC_001190	LincRNAs identified by Cabili et al	252	chr1	-	211886531	211887659		AGATGGCCAGGCACCAAGGAAAATGATTCCCTGGGCCAATCCTCACCACAACCCTAGGAG		intergenic							47.791	22.3579	5.21616	3.92259
ASHGA5P030039	4.03473	4.03473	2.01247	up	noncoding	ENST00000559302	RP11-56B16.4	GENCODE	510	chr15	-	52201098	52201839		CAATTCTGATACCAGCAACATCCCTTTTGATTTAAAAAAGATTGGTCCTCACAATGTTCA		natural antisense	NM_014547	TMOD3	tropomodulin-3	+	52121824	52204331	25.5064	6.0492	4.38936	2.37689
ASHGA5P027136	3.65924	3.65924	1.87154	up	noncoding	NR_038228	LOC100506451	RefSeq	964	chr12	-	26107587	26112375	ENST00000545729	AACTCCCTTGCCAAGGACACTGGGAGGAAGCAGAAAAGCAAAGACCAAGCTCGTACTTTT	100506451	intronic antisense	NM_001164748	RASSF8	ras association domain-containing protein 8 isoform a	+	26111963	26225807	57.02	17.5904	5.43914	3.56759
ASHGA5P027136	3.65924	3.65924	1.87154	up	noncoding	NR_038228	LOC100506451	RefSeq	964	chr12	-	26107587	26112375	ENST00000545729	AACTCCCTTGCCAAGGACACTGGGAGGAAGCAGAAAAGCAAAGACCAAGCTCGTACTTTT	100506451	intronic antisense	NM_007211	RASSF8	ras association domain-containing protein 8 isoform b	+	26111963	26232825	57.02	17.5904	5.43914	3.56759
ASHGA5P043924	68.9868	68.9868	6.10825	up	noncoding	ENST00000422042	AC009276.4	GENCODE	253	chr7	+	134368895	134372742		GAAACACGATTATGACTGCCATCACCTTGCAGTTAACCAATAGTAATGGAATTCCTTTCT		intergenic							2515.11	22.3765	10.0319	3.92363
ASHGA5P027234	88.3024	88.3024	6.46438	up	noncoding	TCONS_00011706	XLOC_005185	LincRNAs identified by Cabili et al	412	chr6	+	16150993	16153073		AAGATTTGCCACTCACTTTGCTTCAGGTTGGAAGGTTTTCTGGAGGAAGGTTGCATTGGA		intergenic							933.267	5	8.78563	2.32125
ASHGA5P018116	2.58602	2.58602	1.37074	up	noncoding	ENST00000449614	AC005077.5	pseudogene	213	chr7	+	75803050	75804891	ENST00000437494	CATCATTCAGGTCACTGTCGATGCCTTGCCAACCTCTGAGGAAATGACAGACTCAATGCC									15.8946	6.19866	3.75467	2.38393
ASHGA5P038157	2.26958	2.26958	1.18243	up	noncoding	ENST00000422374	RP11-466L17.1	GENCODE	4063	chr1	+	56046709	56200675		AATCCCTTCACCCTCTCTCCATCTTTGTAAAAATTCTCCTCATTAAATTATTGTTCAGTG		intergenic							69221.4	21221	15.5976	14.4152
ASHGA5P033728	25.3574	25.3574	4.66434	up	noncoding	TCONS_00016487	XLOC_007865	LincRNAs identified by Cabili et al	1809	chr9	-	132100957	132102959		TACACAGTGACACGTGTGTACATACAGCCCCATACTCACCCTGACACGTAGGTACACACT		intergenic							4213.24	93.1487	10.7772	6.11284
ASHGA5P007456	10.6146	10.6146	3.40798	up	noncoding	uc002tjq.4	LOC654433	UCSC_knowngene	2328	chr2	+	113993106	114024580		ATGGCGAAGGGCCAGGGCCCCACACCTTCCGCCTGACAGCCAGCCAAGCTCTTCAGTCCC	654433	intronic antisense	NM_013953	PAX8	paired box protein Pax-8 isoform PAX8D	-	113973573	114036498	111.617	10.5623	6.25662	2.84864
ASHGA5P007456	10.6146	10.6146	3.40798	up	noncoding	uc002tjq.4	LOC654433	UCSC_knowngene	2328	chr2	+	113993106	114024580		ATGGCGAAGGGCCAGGGCCCCACACCTTCCGCCTGACAGCCAGCCAAGCTCTTCAGTCCC	654433	intronic antisense	NM_013992	PAX8	paired box protein Pax-8 isoform PAX8E	-	113973573	114036498	111.617	10.5623	6.25662	2.84864
ASHGA5P007456	10.6146	10.6146	3.40798	up	noncoding	uc002tjq.4	LOC654433	UCSC_knowngene	2328	chr2	+	113993106	114024580		ATGGCGAAGGGCCAGGGCCCCACACCTTCCGCCTGACAGCCAGCCAAGCTCTTCAGTCCC	654433	natural antisense	NM_003466	PAX8	paired box protein Pax-8 isoform PAX8A	-	113973573	114036498	111.617	10.5623	6.25662	2.84864
ASHGA5P007456	10.6146	10.6146	3.40798	up	noncoding	uc002tjq.4	LOC654433	UCSC_knowngene	2328	chr2	+	113993106	114024580		ATGGCGAAGGGCCAGGGCCCCACACCTTCCGCCTGACAGCCAGCCAAGCTCTTCAGTCCC	654433	natural antisense	NM_013952	PAX8	paired box protein Pax-8 isoform PAX8C	-	113973573	114036498	111.617	10.5623	6.25662	2.84864
ASHGA5P056546	11.0833	11.0833	3.47032	up	noncoding	TCONS_00006033	XLOC_002674	LincRNAs identified by Cabili et al	751	chr3	+	58165850	58173195		CCCCATCCAGCAAGTCTTCAAGCTCCTTAGAAAAGGAATGGCTGCAGCATTTCTCAACTG		intergenic							2226.38	111.794	9.88243	6.41211
ASHGA5P042419	5.19031	5.19031	2.37582	up	noncoding	ENST00000570443	RP1-153P14.8	GENCODE	537	chr6	+	37475123	37503392	ENST00000373404	AACTCTGTTCTTTAAATGTGACCTTAGATGCACCAGACTCATGCCATCCAAAGGTTGGAG		intergenic							85.9423	17.5586	5.94087	3.56505
ASHGA5P050769	4.48792	4.48792	2.16605	up	noncoding	ENST00000452347	RP4-717I23.3	GENCODE	969	chr1	-	93804251	93811405	ENST00000451302, ENST00000457387	CCGCCCTTCCCCCACCCACGCCGGCGGGAGCCGCCCGTTCGCGCTGCCAGCAGCTTCCGC		bidirectional	NM_001938	DR1	protein Dr1	+	93811477	93828148	13697.9	1416.03	12.6019	10.4359
ASHGA5P043793	13.9724	13.9724	3.80451	up	noncoding	TCONS_00018191	XLOC_008474	LincRNAs identified by Cabili et al	372	chr10	+	45073474	45086387		CTCGTCTGCATCCATCTAGAAAATATTCATTTACACAAGTGGAGCAGGAATATATTTTTG		intergenic							111.985	7.097	6.26022	2.45571
ASHGA5P040704	2.5576	2.5576	1.35479	up	noncoding	NR_027127	LOC340074	RefSeq	2042	chr5	-	134984371	134989624		ATCATTTACAAGCAATCATAGGCCCTCATGGATTTCAAGTAAACTTTCCTATAAACCAGT	340074	intergenic							18.2372	8.75611	3.94914	2.59434
ASHGA5P041108	48.5863	48.5863	5.60248	up	noncoding	NR_028508	PART1	RefSeq	2108	chr5	+	59783758	59787092		GAAAAATAGTTGCTTTTTAAAATGTCAGCAAGAAGGCCTGCCTCATCTTAACAAAGCAAA	25859	natural antisense	NM_001165899	PDE4D	cAMP-specific 3',5'-cyclic phosphodiesterase 4D isoform PDE4D7	-	58264865	59783925	454.577	5	7.92373	2.32125
ASHGA5P029211	46.7845	46.7845	5.54796	up	noncoding	ENST00000554634	RP1-261D10.2	GENCODE	464	chr14	-	71773886	71778076		GAGACTGAAATGGAAGTCTCTTAGTACTCCACCCAAGGATTTTCATATTAAACAATTATC		intergenic							749.698	11.6382	8.53188	2.98393
ASHGA5P023042	4.39909	4.39909	2.1372	up	noncoding	ENST00000568471	RP11-883G14.3	GENCODE	584	chr16	-	51069028	51072675		TGCTCATCAGAGTGTGTTACCTTCTTTCCACCTCAGGTTTCATCATCTGAAAATGAGAAG		intergenic							515.942	83.8193	8.0867	5.9495
ASHGA5P019495	3.85892	3.85892	1.9482	up	noncoding	NR_038133	CHN1	RefSeq	2048	chr2	-	175664041	175870107		GGCCAAGCCTCCTGCCTCGCAGATACAGATGAATATAGACCTCCTGTTTGGAAATCTTAC	1123	exon sense-overlapping	NM_001025201	CHN1	N-chimaerin isoform 2	-	175664041	175870107	526.895	96.1189	8.11441	6.16621
ASHGA5P019495	3.85892	3.85892	1.9482	up	noncoding	NR_038133	CHN1	RefSeq	2048	chr2	-	175664041	175870107		GGCCAAGCCTCCTGCCTCGCAGATACAGATGAATATAGACCTCCTGTTTGGAAATCTTAC	1123	exon sense-overlapping	NM_001206602	CHN1	N-chimaerin isoform 3	-	175664041	175712346	526.895	96.1189	8.11441	6.16621
ASHGA5P019495	3.85892	3.85892	1.9482	up	noncoding	NR_038133	CHN1	RefSeq	2048	chr2	-	175664041	175870107		GGCCAAGCCTCCTGCCTCGCAGATACAGATGAATATAGACCTCCTGTTTGGAAATCTTAC	1123	exon sense-overlapping	NM_001822	CHN1	N-chimaerin isoform 1	-	175664041	175869981	526.895	96.1189	8.11441	6.16621
ASHGA5P054958	1147.6	1147.6	10.1644	up	noncoding	TCONS_00008983	XLOC_003839	LincRNAs identified by Cabili et al	307	chr4	+	190198382	190198838	TCONS_00008385, TCONS_00008386, TCONS_00008387, TCONS_00008982	ATGTGACAGACTCTCATAGTCACCATCATCAAGGGAATCTTGTGCATGTTACAGGGAAGC		intergenic							51624.2	42.3112	15.0508	4.88638
ASHGA5P037838	1033.53	1033.53	10.0134	up	noncoding	TCONS_00024733	XLOC_012014	LincRNAs identified by Cabili et al	373	chr16	-	77028204	77042204		TTTCCACGGGGTAGAAACATCGACAAGGACTTCGGAAACACACCACTTGAATACCTTCAA		intergenic							15107.4	9.99812	12.7861	2.77273
ASHGA5P031856	2.3993	2.3993	1.26261	up	noncoding	TCONS_00006568	XLOC_003195	LincRNAs identified by Cabili et al	243	chr3	-	104536325	104626299		ATCTTTGGAGATTGGAGAGTCCACCAAGGATGCCCACTGGCTCCCTACAAAGTTTTTTAT		intergenic							38.3235	18.8843	4.93478	3.67216
ASHGA5P022409	5.05421	5.05421	2.33749	up	noncoding	ENST00000556266	DIO3OS	GENCODE	401	chr14	-	102023640	102025113		TGAATGGCAGTCATCCTCTTCAGCGGTCCTCCCAGAGCTGTCCTCAGCATGGCAGCCTCC		intergenic							1048.21	123.5	8.91238	6.5749
ASHGA5P018579	19.7524	19.7524	4.30396	up	noncoding	NR_046870	LINC00332	RefSeq	836	chr13	+	40755945	40763167		AGGAAGCCTGCACATAGAGACCTCCCATAGAGACGAAATATATCTACAAAAGGGTCACTG	100874127	intergenic							2548.11	73.8592	10.0508	5.7468
ASHGA5P045220	6.56679	6.56679	2.71519	up	noncoding	uc004aaw.1	BC021061	UCSC_knowngene	1418	chr9	-	37910720	37912138		TAAAAAATGCTCCAGCCTCACTGGACATCTCCTGAAGTTGAGACCACAGCTCTTAAGATC		intergenic							94.1261	14.8622	6.04171	3.32652
ASHGA5P039707	3.78385	3.78385	1.91985	up	noncoding	ENST00000512634	RP11-87F15.2	GENCODE	610	chr4	-	177229418	177241609		CCCACCAATTACATTTCTCCATTTTCAGTGTTCATTGAGCCATTGGATATAAATGTGAAT		natural antisense	NM_021928	SPCS3	signal peptidase complex subunit 3	+	177241089	177253396	247.515	54.5544	7.1966	5.27675
ASHGA5P039831	81.7691	81.7691	6.35348	up	noncoding	ENST00000515691	RP11-168E17.1	GENCODE	541	chr4	+	12225074	12249731		GCATCTCCCTTTATCATCATCCTATTTTAAAGAGTAACACTGACTCGCAAACAATTTAGT		intergenic							37691.2	310.797	14.4053	8.05185
ASHGA5P050231	10.1516	10.1516	3.34363	up	noncoding	ENST00000432537	LINC00466	GENCODE	485	chr1	-	63624706	63626081		TTCAAAGTATTCATTTAGCTGTTCCTCTCCTTCATCATTCCATTTAACATTCTCTTTCTC	199899	intergenic							2374.05	126.335	9.95702	6.61338
ASHGA5P037540	2.23389	2.23389	1.15956	up	noncoding	ENST00000472972	KCNMB3P1	GENCODE	307	chr22	-	17061966	17063492	ENST00000493696, NM_001163677, NM_014407, NM_171828, NM_171829, NM_171830, NR_028135	ACCCATTCAGCTCAGAAAGCTCTCCTACATTATAATGAAGAGGCTGTCCAGATAAATCCC		intergenic							52.7611	26.5251	5.33792	4.17836
ASHGA5P041486	72.7016	72.7016	6.18392	up	noncoding	ENST00000523605	CTB-12O2.1	GENCODE	463	chr5	+	151596634	151649993		TGGACTTATGAAGGATTCCTCTCTCCATTCGTGGATGAATTTGAGTGGCACTGGAACAAG		intergenic							4280.76	35.6476	10.8039	4.61998
ASHGA5P053676	2.06807	2.06807	1.04829	up	noncoding	uc003zxn.1	HV041854	UCSC_knowngene	470	chr9	+	35673709	35674179		AAACCTGTGAGACTTTGGCTCCATCTCTGCAAAAGGGCGCTCTGTGAGTCAGCCTGCTCC		exon sense-overlapping	NM_001216	CA9	carbonic anhydrase 9 precursor	+	35673914	35681154	14.9499	8.93513	3.66405	2.61577
ASHGA5P052101	63.0484	63.0484	5.97839	up	noncoding	ENST00000515329	RP11-73G16.1	GENCODE	2652	chr4	+	152877142	152890533		GATCTCACTTTTTAAGGAACACTGAAATAAATGCTTTAGTGAAGCAGAATAGCCCTTTTG		intergenic							611.175	5	8.29964	2.32125
ASHGA5P046753	2.19327	2.19327	1.13308	up	noncoding	ENST00000415405	TTTY7B	GENCODE	1111	chrY	-	9544432	9552871	ENST00000276770, NR_001534	TGACCTTATTGCTACTCACACTCTAGGTCCCAGGATAAAATCCCAACATGATGGAGGAGT	100101120	intergenic							15.8819	8.96206	3.75278	2.6197
ASHGA5P027140	661.655	661.655	9.36994	up	noncoding	ENST00000541940	RP11-283G6.5	GENCODE	708	chr12	-	26384326	26424853		CCTGAAATTCACCATTCACACCATCAAACTGGACTAACAGGAAAGAAGATTATGTAAGGA		natural antisense	NM_001135823	SSPN	sarcospan isoform 2	+	26348268	26387708	49841.2	67.4162	14.9801	5.61013
ASHGA5P027140	661.655	661.655	9.36994	up	noncoding	ENST00000541940	RP11-283G6.5	GENCODE	708	chr12	-	26384326	26424853		CCTGAAATTCACCATTCACACCATCAAACTGGACTAACAGGAAAGAAGATTATGTAAGGA		natural antisense	NM_005086	SSPN	sarcospan isoform 1	+	26348505	26387708	49841.2	67.4162	14.9801	5.61013
ASHGA5P036343	2.58059	2.58059	1.3677	up	noncoding	TCONS_00026283	XLOC_012628	LincRNAs identified by Cabili et al	502	chr18	+	12073318	12075074		AATGAAATCACGTCTACTTCCAGTTCAATACGATGCTTCCACCTAAGAAACCCGTCAACG		intergenic							99.5072	38.5671	6.11211	4.74441
ASHGA5P048246	57.0831	57.0831	5.83499	up	noncoding	AL713779		LincRNAs identified by Khalil et al	2775	chr3	+	128268891	128271202		ATGTGCACTTTTGTGATGTGGAAGGCAAATGGAAGAGAGACACCATCTCCACGTGACTTT		intergenic							544.156	5	8.15624	2.32125
ASHGA5P032869	25.8496	25.8496	4.69207	up	noncoding	ENST00000584540	RP11-640I15.1	GENCODE	571	chr17	+	15554903	15557803		TAAGGACTTCAACACCAGGACAGCCATTCATCTACTCCCATCTCATAGAACTGGACATGA		natural antisense	NM_006470	TRIM16	tripartite motif-containing protein 16	-	15531279	15586193	25148	553.419	13.6707	8.97862
ASHGA5P031061	110.01	110.01	6.7815	up	noncoding	ENST00000568057	RP11-264B17.2	GENCODE	573	chr16	-	28968058	28969158		TTTGTATGAAATCACCCATCACAAAGGTGACAACAAACTCGTATATTTTTAAAGCACTTG		intronic antisense	NM_032815	NFATC2IP	NFATC2-interacting protein	+	28962317	28977767	1233.88	5	9.10275	2.32125
ASHGA5P026072	2.60603	2.60603	1.38185	up	noncoding	BF869766		LincRNAs identified by Khalil et al	113	chr5	-	61582993	61583108		AGGACCTTGTCCAGCCTCCATTCCTGACACCCTCTCTGAAAGGATATCACTTCTGTTAGA		intergenic							28401.5	5556.64	13.9025	12.5206
ASHGA5P057249	12.3275	12.3275	3.6238	up	noncoding	TCONS_00014958	XLOC_007037	LincRNAs identified by Cabili et al	537	chr8	-	29368978	29371353		ATCCCATGGAAAGCCATCTCCAAGCTCCTCAGATTGGGAAAACACATATCGAAATCAGGA		intergenic							627.173	37.6647	8.33286	4.70905
ASHGA5P032097	2.15626	2.15626	1.10853	up	noncoding	ENST00000442868	RP11-480I12.5	pseudogene	1262	chr1	-	202822118	202828227		ATTGCCACCATTAAAACCAAGCAAATATTTGTTTTGCGGACGTGTCCCACAGGTTTCAAG									12.5442	5	3.42978	2.32125
ASHGA5P021474	7.9871	7.9871	2.99767	up	noncoding	ENST00000533009	RP1-65P5.3	GENCODE	150	chr11	-	32118688	32126637	ENST00000517509, ENST00000520432, NR_024458, uc001vac.3, uc010tfr.2	TGGAGGTTTCATATACACCACTTACAGTTTTCAGCTCCTCAGTAGTGACAAAGCCATCCC		natural antisense	NM_002901	RCN1	reticulocalbin-1 precursor	+	32112476	32127272	208.041	23.6281	6.99578	3.9981
ASHGA5P034776	298.471	298.471	8.22145	up	noncoding	TCONS_00004671	XLOC_001317	LincRNAs identified by Cabili et al	900	chr2	+	1754992	1757189	TCONS_00003544	AGAGCATCCATCACCAGGATTCTCAGGCAGGTGTTACACCAGAGCTCATGCGTGTCTGGC		intergenic							23898.5	57.2279	13.5722	5.35074
ASHGA5P049673	3.47187	3.47187	1.79571	up	noncoding	ENST00000438131	KRT42P	GENCODE	2895	chr17	-	39782578	39791665		TATGGAAAAACCACTTGCTCAGCTTCTCCTTGTAAATTCCTGGTGAGTAGCCACAGAGTG	284116	intron sense-overlapping	ENST00000540235	JUP	junction plakoglobin [Source:HGNC Symbol;Acc:6207]	-	39775691	39928106	166.613	43.5357	6.72855	4.93284
ASHGA5P038319	2.05052	2.05052	1.03599	up	noncoding	ENST00000482003	RP11-47P18.1	GENCODE	403	chr3	-	80810192	80838114		GAAGGTGAAACTGGCATGTCTGTTTGTTCTTCTCTTCCTGGTGTCAAAGACTCTTAAAGC		intergenic							28.0716	16.6654	4.52548	3.48949
ASHGA5P050634	21.6167	21.6167	4.43408	up	noncoding	ENST00000420330	AC009404.2	GENCODE	3090	chr2	+	118591512	118599234		GGAATTTAACCTCTCAAAAATGCTATTCCCATTATCTATTCTTCCTCAGCTACAAAGCCC		intergenic							911.64	29.2918	8.76018	4.3261
ASHGA5P021560	3.715	3.715	1.89336	up	noncoding	ENST00000534988	RP11-783K16.14	GENCODE	923	chr11	-	63996685	64001764		CCCCATCCAGAAATAGCAGATGCCAACGGAATCCAAGAATAAAGTCGTTTATTATTTTCA		natural antisense	NM_001128612	NUDT22	nucleoside diphosphate-linked moiety X motif 22 isoform a	+	63993737	63997488	108.091	29.2306	6.21633	4.32296
ASHGA5P021560	3.715	3.715	1.89336	up	noncoding	ENST00000534988	RP11-783K16.14	GENCODE	923	chr11	-	63996685	64001764		CCCCATCCAGAAATAGCAGATGCCAACGGAATCCAAGAATAAAGTCGTTTATTATTTTCA		natural antisense	NM_001128613	NUDT22	nucleoside diphosphate-linked moiety X motif 22 isoform b	+	63993737	63997488	108.091	29.2306	6.21633	4.32296
ASHGA5P021560	3.715	3.715	1.89336	up	noncoding	ENST00000534988	RP11-783K16.14	GENCODE	923	chr11	-	63996685	64001764		CCCCATCCAGAAATAGCAGATGCCAACGGAATCCAAGAATAAAGTCGTTTATTATTTTCA		natural antisense	NM_005528	DNAJC4	dnaJ homolog subfamily C member 4	+	63997752	64001753	108.091	29.2306	6.21633	4.32296
ASHGA5P021560	3.715	3.715	1.89336	up	noncoding	ENST00000534988	RP11-783K16.14	GENCODE	923	chr11	-	63996685	64001764		CCCCATCCAGAAATAGCAGATGCCAACGGAATCCAAGAATAAAGTCGTTTATTATTTTCA		natural antisense	NM_032344	NUDT22	nucleoside diphosphate-linked moiety X motif 22 isoform a	+	63993737	63997488	108.091	29.2306	6.21633	4.32296
ASHGA5P029115	2.54698	2.54698	1.34879	up	noncoding	ENST00000557160	RP11-831F12.2	GENCODE	568	chr14	-	50174384	50175510		ATAATAGTTCAAAAATAACCAGCTGGGCGCAGTGGCTCAGCCAGCATTTTGTAATCCCAG		intronic antisense	NM_172193	KLHDC1	kelch domain-containing protein 1	+	50159822	50219870	15.0039	5	3.67004	2.32125
ASHGA5P054965	2.9332	2.9332	1.55248	up	noncoding	TCONS_00008390	XLOC_003840	LincRNAs identified by Cabili et al	1065	chr4	+	190471864	190498063		TACTTTTCTTTTTCCCCATTCCTTACAGAGGAGTTCCCTGCTCAAGGGAAGCACATGGTA		intergenic							1731.14	298.065	9.53691	7.98443
ASHGA5P058241	11.4232	11.4232	3.5139	up	noncoding	TCONS_00028462	XLOC_013835	LincRNAs identified by Cabili et al	558	chr20	-	61199862	61200695		AGGAGTCCTACAGTCTCACAGTGCCACCCAGCAGTGCCAACCCAGCAAAGGTCTTGAGAA		intergenic							12562.3	537.31	12.4444	8.93052
ASHGA5P048838	6.78829	6.78829	2.76305	up	noncoding	uc010bmb.3	LOC727849	UCSC_knowngene	3186	chr15	+	82944794	82976263	ENST00000335068, ENST00000400817, ENST00000560756, NR_033936, uc002bkc.3, uc002blo.2, uc010blx.2, uc010bmc.3, uc010bmm.3, uc010bmn.3	ATCACACACCTTGCTGGTCACACAGTCACAGACTCGCCTCTGCTCCTGTGGTCCAGTGGC	727849	intergenic							57024.8	5399.77	15.2424	12.4794
ASHGA5P027175	119.889	119.889	6.90555	up	noncoding	TCONS_00012423	XLOC_005164	LincRNAs identified by Cabili et al	2071	chr6	+	8933051	8940585		CACCATCTTTTCAAACTTTTGCCGTGACAGAATTGTTTTTGATACCCACATAGAAAAGAT		intergenic							1355.8	5	9.22681	2.32125
ASHGA5P032427	8.22386	8.22386	3.03982	up	noncoding	TCONS_00029901	XLOC_014361	LincRNAs identified by Cabili et al	203	chr22	-	36517579	36525898		TGACAAGGGAATCTTCCTTCATTTTCTCCTCTGATGAGCCTCTCTACCAGATAAGCAGCA		intergenic							1746.79	119.183	9.54924	6.50943
ASHGA5P042981	2.66309	2.66309	1.4131	up	noncoding	uc003tbk.4	AL137445	UCSC_knowngene	1422	chr7	-	30617110	30625588		AACGTAGTAAGTTTATGTTTTTAAGGTCTGCCCCTCCCTTCTTGCATTATATCATAAACT		intergenic							5729.49	931.052	11.2265	9.81344
ASHGA5P058443	2.82967	2.82967	1.50063	up	noncoding	uc003pol.1	TSG1	UCSC_knowngene	2949	chr6	+	94428020	94456476		TAAAGACACCCATCGCGACTTACCAAGTCACTACTATGGCAAGATCAAGACTGGATCTAG	643432	intergenic							16.6697	5	3.82188	2.32125
ASHGA5P035881	12.8829	12.8829	3.68738	up	noncoding	ENST00000445738	AC007365.1	GENCODE	1386	chr2	+	64834108	64843133		TTCTGTGTGGTTTGCACGTTCGTCCACTGTACCGAGGTAGCATTTCTTCTCATTATGACT		intergenic							130.136	9.8176	6.43196	2.74458
ASHGA5P018124	15.2721	15.2721	3.93283	up	noncoding	ENST00000449689	GTF2IRD2P1	pseudogene	1119	chr7	-	72662610	72694143		GCAAGGTAATCTTTCAGGAAGCCACCCTTCTTCCACAAGCAATGAAGTAATAGAAATGGA	401375								952.282	42.0305	8.8078	4.87497
ASHGA5P058592	3.10107	3.10107	1.63276	up	noncoding	uc010oaw.1	NPPA-AS1	UCSC_knowngene	957	chr1	+	11900375	11907674		AGAAGCAGAGCAGGCAGAGCTCAGAGGATCTTGGCATCACCCACCAAAGTTAGCTGAAAG	100379251	exon sense-overlapping	NM_001256959	CLCN6	chloride transport protein 6 isoform 2	+	11866152	11903201	4146.02	603.109	10.7539	9.12115
ASHGA5P058592	3.10107	3.10107	1.63276	up	noncoding	uc010oaw.1	NPPA-AS1	UCSC_knowngene	957	chr1	+	11900375	11907674		AGAAGCAGAGCAGGCAGAGCTCAGAGGATCTTGGCATCACCCACCAAAGTTAGCTGAAAG	100379251	exon sense-overlapping	NM_001286	CLCN6	chloride transport protein 6 isoform 1	+	11866152	11903201	4146.02	603.109	10.7539	9.12115
ASHGA5P058592	3.10107	3.10107	1.63276	up	noncoding	uc010oaw.1	NPPA-AS1	UCSC_knowngene	957	chr1	+	11900375	11907674		AGAAGCAGAGCAGGCAGAGCTCAGAGGATCTTGGCATCACCCACCAAAGTTAGCTGAAAG	100379251	natural antisense	NM_006172	NPPA	natriuretic peptides A preproprotein	-	11905766	11907840	4146.02	603.109	10.7539	9.12115
ASHGA5P037741	21.9855	21.9855	4.45848	up	noncoding	NR_038957	LOC100506714	RefSeq	1313	chr22	-	45529638	45548465	NR_038956	CCCAACAAATACTGATTTATTTCCTTCTTTTTCCTTGCTCAGAAAAAATTGGAGAAGGCT	100506714	intergenic							571.934	19.9672	8.21276	3.75428
ASHGA5P016336	3.23002	3.23002	1.69154	up	noncoding	ENST00000429443	RP11-90L20.2	GENCODE	1809	chr1	-	201692421	201706634		TAAGTTCCTCTTTCCTTCTTGATGAGGACGGACACTTCAGAGCCAAAGAGGAAACGAATC		intronic antisense	NM_020443	NAV1	neuron navigator 1 isoform 1	+	201617449	201796102	646.73	130.784	8.36208	6.67054
ASHGA5P026491	32.8563	32.8563	5.0381	up	noncoding	CN281635		LincRNAs identified by Khalil et al	717	chr6	-	44619407	44637427		AGCGCTCATATGGTCACTCAGAGCTTTCTCATCCTTCAAGGTTCAGCTCAAAACTGACTT		intergenic							283.285	5.00961	7.36058	2.32248
ASHGA5P029347	2.42007	2.42007	1.27505	up	noncoding	ENST00000557661	DIO3OS	GENCODE	1937	chr14	-	102023640	102026768	ENST00000555174	TTCTGATCCCAAGCCCATCCTCCTGGGGCAGTCTTCCCTTGAAAGGGAGGGTTTGGTGAA		bidirectional	NM_001362	DIO3	type III iodothyronine deiodinase	+	102027687	102029789	290.913	93.3221	7.39109	6.11604
ASHGA5P039849	3.68597	3.68597	1.88205	up	noncoding	ENST00000515680	RP11-120A1.1	GENCODE	341	chr4	+	21306164	21318108		AAGATTTAAGCCAAAAGCATAACCCTGCAACAAAAATCACCATGTCTAGAATTCAACCAT		intronic antisense	NM_001035003	KCNIP4	Kv channel-interacting protein 4 isoform 5	-	20730238	21699318	22.1005	5	4.2033	2.32125
ASHGA5P039849	3.68597	3.68597	1.88205	up	noncoding	ENST00000515680	RP11-120A1.1	GENCODE	341	chr4	+	21306164	21318108		AAGATTTAAGCCAAAAGCATAACCCTGCAACAAAAATCACCATGTCTAGAATTCAACCAT		intronic antisense	NM_001035004	KCNIP4	Kv channel-interacting protein 4 isoform 3	-	20730238	21546279	22.1005	5	4.2033	2.32125
ASHGA5P039849	3.68597	3.68597	1.88205	up	noncoding	ENST00000515680	RP11-120A1.1	GENCODE	341	chr4	+	21306164	21318108		AAGATTTAAGCCAAAAGCATAACCCTGCAACAAAAATCACCATGTCTAGAATTCAACCAT		intronic antisense	NM_147182	KCNIP4	Kv channel-interacting protein 4 isoform 3	-	20730238	21950374	22.1005	5	4.2033	2.32125
ASHGA5P026447	2.39173	2.39173	1.25805	up	noncoding	ENST00000534388	RP11-736I10.1	GENCODE	522	chr11	+	59792380	59798550		GAGTCACCAACTCCCACACAAAGTAAAACATGGACACTTAATTTTAACAGTGTTAATAAG		intergenic							77.0677	34.1876	5.81299	4.55494
ASHGA5P032103	19.9121	19.9121	4.31557	up	noncoding	uc002fxw.1	AX748345	UCSC_knowngene	1890	chr17	-	4384323	4389747		TTTTCCTATCAGCTCCTCGTGGCTTTCTTGGCCGCCCAAAGCTGTTCACGTGAACGTGCC		natural antisense	NM_182538	SPNS3	protein spinster homolog 3	+	4337218	4391499	3586.32	99.9181	10.5416	6.22599
ASHGA5P058611	90.3394	90.3394	6.49728	up	noncoding	uc011ahn.1	PI4KAP1	UCSC_knowngene	1632	chr22	-	20386525	20402440		ATATCATCCACATCGTCACAGGCAGCTCTTTGGGGTTTTGCAGACTTTGGCTTCATGTTT	728233	intergenic							19576.4	135.741	13.2214	6.72412
ASHGA5P030224	10.3856	10.3856	3.37651	up	noncoding	ENST00000558015	RP11-561C5.6	GENCODE	470	chr15	-	85857897	85858747		CTCACTACCCAGAGAGAAGCAATGTTGACATATTTCTCTTCCTCAATGCATATTTATATA		intergenic							82.3128	7.84799	5.89016	2.51366
ASHGA5P018797	4.64675	4.64675	2.21622	up	noncoding	ENST00000457756	AC073636.1	GENCODE	558	chr2	-	177710783	177714131		TAGCATCTTTCAAAAGTCACTTATTGGTATCTCCTCCAGTCCCAGAAGGAGGAGTTGAGG		intergenic							33.7209	8.43108	4.7701	2.55388
ASHGA5P021499	9.38021	9.38021	3.22962	up	noncoding	ENST00000533590	RP11-535A19.2	GENCODE	572	chr11	-	75514506	75525618		TTTGAGCTATGTATCCCAAGAGCCCTCTTTCTTCCATTCACTTACCTGTCTAGTCAAACA		bidirectional	NM_003369	UVRAG	UV radiation resistance-associated gene protein	+	75526211	75855282	3125.13	171.167	10.3282	7.09853
ASHGA5P049750	2.59328	2.59328	1.37478	up	noncoding	TCONS_00013599	XLOC_006253	LincRNAs identified by Cabili et al	5358	chr7	+	130610772	130618587		ACTGACATGGCTTTAGGAAACACAGCACATTCACAAACATCTGAAGCCAACTGCAAGGCA		intergenic							70.1328	29.3699	5.70573	4.33095
ASHGA5P021926	78.5004	78.5004	6.29463	up	noncoding	ENST00000544704	RP11-725K16.4	GENCODE	549	chr11	+	102654451	102702264		AATTAATGCCCTGGAGCAGAGTCGCTGGGAAGCTGTGAGACACCACACCCCAGAACAGCA		natural antisense	NM_001145938	MMP1	interstitial collagenase isoform 2	-	102660640	102668966	30037.6	251.255	14.0031	7.70845
ASHGA5P021926	78.5004	78.5004	6.29463	up	noncoding	ENST00000544704	RP11-725K16.4	GENCODE	549	chr11	+	102654451	102702264		AATTAATGCCCTGGAGCAGAGTCGCTGGGAAGCTGTGAGACACCACACCCCAGAACAGCA		natural antisense	NM_002421	MMP1	interstitial collagenase isoform 1 preproprotein	-	102660640	102668966	30037.6	251.255	14.0031	7.70845
ASHGA5P048241	2.86491	2.86491	1.51849	up	noncoding	TCONS_00013856	XLOC_006486	LincRNAs identified by Cabili et al	1264	chr7	-	66798436	66800523		TGGAACTTTGGAAGGGCCTCCTCACCCAATAGGAAGACCTGGCTAGGAATTTAATTTTTT		intergenic							78.2057	28.9735	5.82936	4.31087
ASHGA5P020129	2.72776	2.72776	1.44772	up	noncoding	ENST00000508547	CTB-174D11.1	GENCODE	548	chr5	+	168440252	168451093		AGGAGCAAGGCAGCTCCCCCACCTACATTCCACCATATTGAAGGGCTTACCTGTCTGGTG		intronic antisense	NM_003062	SLIT3	slit homolog 3 protein precursor	-	168093070	168728133	2535.41	438.83	10.0414	8.59371
ASHGA5P031895	411.275	411.275	8.68396	up	noncoding	ENST00000567077	RP11-432I5.6	GENCODE	406	chr16	+	71688929	71698115		TATATAGAAACCATCATGTCACCTCAGTATGGAATGCTGCCATTCTAAGCTTCCAAATGG		natural antisense	NM_015020	PHLPP2	PH domain leucine-rich repeat-containing protein phosphatase 2	-	71678851	71748704	4921.31	5	11.0052	2.32125
ASHGA5P034085	3.93405	3.93405	1.97602	up	noncoding	uc021uqd.1	AK095221	UCSC_knowngene	2987	chr19	-	16234470	16250702		TCTTAGAATCAAGCAGAAGCACCTGGAAAACACTGAGCCAGCCATCCTATTCCAGGTTTT		intronic antisense	NM_032855	HSH2D	hematopoietic SH2 domain-containing protein	+	16244837	16269377	709.876	117.185	8.46035	6.48433
ASHGA5P034085	3.93405	3.93405	1.97602	up	noncoding	uc021uqd.1	AK095221	UCSC_knowngene	2987	chr19	-	16234470	16250702		TCTTAGAATCAAGCAGAAGCACCTGGAAAACACTGAGCCAGCCATCCTATTCCAGGTTTT		natural antisense	NM_005370	RAB8A	ras-related protein Rab-8A	+	16222489	16244445	709.876	117.185	8.46035	6.48433
ASHGA5P023530	178.257	178.257	7.47782	up	noncoding	ENST00000584714	CTC-297N7.5	GENCODE	541	chr17	+	10633112	10670191	ENST00000583115	AGTCTGAAACAGGGTCATCACCATAGCACCTGACATACCTGGATATAAACAATATCCAAG		natural antisense	NM_001004313	TMEM220	transmembrane protein 220 precursor	-	10616638	10633646	33648.3	135.649	14.2013	6.72351
ASHGA5P019198	2.91106	2.91106	1.54154	up	noncoding	NR_045213	FCGR1B	RefSeq	2202	chr1	-	120926127	120935944	ENST00000413317, NM_000566, NR_027484	CAAGTGCTTGGCCTCCAGTTACCAACTCCTGTCTGGTTTCATGTCCTTTTCTATCTGGCA	2210	exon sense-overlapping	NM_001004340	FCGR1B	high affinity immunoglobulin gamma Fc receptor IB isoform 2 precursor	-	120926127	120935944	364.314	93.7455	7.66525	6.12371
ASHGA5P019198	2.91106	2.91106	1.54154	up	noncoding	NR_045213	FCGR1B	RefSeq	2202	chr1	-	120926127	120935944	ENST00000413317, NM_000566, NR_027484	CAAGTGCTTGGCCTCCAGTTACCAACTCCTGTCTGGTTTCATGTCCTTTTCTATCTGGCA	2210	exon sense-overlapping	NM_001017986	FCGR1B	high affinity immunoglobulin gamma Fc receptor IB isoform 1 precursor	-	120926127	120935944	364.314	93.7455	7.66525	6.12371
ASHGA5P019198	2.91106	2.91106	1.54154	up	noncoding	NR_045213	FCGR1B	RefSeq	2202	chr1	-	120926127	120935944	ENST00000413317, NM_000566, NR_027484	CAAGTGCTTGGCCTCCAGTTACCAACTCCTGTCTGGTTTCATGTCCTTTTCTATCTGGCA	2210	exon sense-overlapping	NM_001244910	FCGR1B	high affinity immunoglobulin gamma Fc receptor IB isoform 3 precursor	-	120927646	120935944	364.314	93.7455	7.66525	6.12371
ASHGA5P018488	3.47823	3.47823	1.79835	up	noncoding	ENST00000454129	HCG18	GENCODE	4433	chr6	-	30258782	30294153		AGCTTAGCAGAGCTCCCTCTTTGCCCACTAGCAGGGCATTAGCTGGTGCTGAAGACAGTG	414777	bidirectional	NM_021253	TRIM39	tripartite motif-containing protein 39 isoform 1	+	30294620	30311506	69.6059	21.9424	5.69546	3.89711
ASHGA5P018488	3.47823	3.47823	1.79835	up	noncoding	ENST00000454129	HCG18	GENCODE	4433	chr6	-	30258782	30294153		AGCTTAGCAGAGCTCCCTCTTTGCCCACTAGCAGGGCATTAGCTGGTGCTGAAGACAGTG	414777	bidirectional	NM_172016	TRIM39	tripartite motif-containing protein 39 isoform 2	+	30295007	30311506	69.6059	21.9424	5.69546	3.89711
ASHGA5P000010	9.38911	9.38911	3.23099	up	noncoding	AF070625		NRED	1728	chr13	-	110637212	110638912		GACCATTCCAGTATCCTTACCTTACAGAAATGACAGCAACAACAGCAAATATGAGTAAAG		intergenic							1239.67	79.8622	9.10834	5.87735
ASHGA5P057970	3.44284	3.44284	1.7836	up	noncoding	TCONS_00024490	XLOC_011810	LincRNAs identified by Cabili et al	462	chr16	+	86052352	86061287		TAAGAGGAAGCAGCAATGCTCTGTGTAAAGACACTCCACACACACACTCAGGAAATGGAA		intergenic							101400	21389.4	16.2119	14.4283
ASHGA5P016878	2.00281	2.00281	1.00203	up	noncoding	ENST00000435322	AL163953.3	GENCODE	566	chr14	+	53684608	53836219		ATGTCAACAGGTTTCAGCATTTTCTCCATCATCACCCTTGGGACTTGGATAAAACTACTG		intergenic							61173.8	20825.5	15.3795	14.3774
ASHGA5P021454	2.74805	2.74805	1.45841	up	noncoding	ENST00000532686	RP11-165H20.1	pseudogene	1449	chr1	+	111822681	111828665		TGAAAAACAAAAATAGTCAACTGAAAACTCTCTTGGCTATTGGTGGCTGGAACTTTGGCA	149620								17.7296	7.07652	3.91241	2.454
ASHGA5P023516	2.69601	2.69601	1.43082	up	noncoding	ENST00000582712	LINC00511	GENCODE	141	chr17	-	70417120	70424430		CAAGAAAGAGAAGATCAGGTTCAAGTTGCCAGCCAGACTCTGGGCTTCCAGGAGGAGTGG	400619	intergenic							15.8736	5	3.75208	2.32125
ASHGA5P031626	2.48237	2.48237	1.31172	up	noncoding	ENST00000566108	CTD-2540M10.1	GENCODE	293	chr16	+	24621586	24652278		AACAATTTAATACAAAAACACAAGCAGGTTCCCCTCCTCTCCTTTGCCTTTGGTCTGGCT		intergenic							12127.8	2137.89	12.3867	11.075
ASHGA5P046974	4.42327	4.42327	2.14511	up	noncoding	ENST00000432108	RP11-219F10.1	GENCODE	309	chr10	-	85671409	85672678		TGTTTTGAAGGGGCTGGAAGTCTTTTCTGTCACCACCTTTACCTACCTGTCATCTGTGAA		intergenic							225.006	43.7088	7.08467	4.93956
ASHGA5P053004	44.2734	44.2734	5.46837	up	noncoding	ENST00000517635	HOXA-AS2	GENCODE	2455	chr7	+	27154966	27162996		TGTAAAATAAATACATACTCCATCTCCACACCCATACTTTCTCCTTTTTCTTTCTTTTTT	285943	intronic antisense	NM_030661	HOXA3	homeobox protein Hox-A3 isoform a	-	27145808	27159214	61765.1	996.987	15.396	9.92766
ASHGA5P053004	44.2734	44.2734	5.46837	up	noncoding	ENST00000517635	HOXA-AS2	GENCODE	2455	chr7	+	27154966	27162996		TGTAAAATAAATACATACTCCATCTCCACACCCATACTTTCTCCTTTTTCTTTCTTTTTT	285943	natural antisense	NM_153631	HOXA3	homeobox protein Hox-A3 isoform a	-	27145808	27166639	61765.1	996.987	15.396	9.92766
ASHGA5P025864	10.3979	10.3979	3.37822	up	noncoding	NR_040773	LOC100505666	RefSeq	1202	chr1	-	155017667	155036467		CCAGCACCATCTTTGCGGAGTGGCAGCAGAGTCCGTTTGCCCTGGAAAACAAATGTCCAC	100505666	intronic antisense	NM_001261464	ADAM15	disintegrin and metalloproteinase domain-containing protein 15 isoform 7 preproprotein	+	155023747	155035252	557.992	40.1741	8.18367	4.80545
ASHGA5P025864	10.3979	10.3979	3.37822	up	noncoding	NR_040773	LOC100505666	RefSeq	1202	chr1	-	155017667	155036467		CCAGCACCATCTTTGCGGAGTGGCAGCAGAGTCCGTTTGCCCTGGAAAACAAATGTCCAC	100505666	intronic antisense	NM_001261465	ADAM15	disintegrin and metalloproteinase domain-containing protein 15 isoform 8 preproprotein	+	155023747	155035252	557.992	40.1741	8.18367	4.80545
ASHGA5P025864	10.3979	10.3979	3.37822	up	noncoding	NR_040773	LOC100505666	RefSeq	1202	chr1	-	155017667	155036467		CCAGCACCATCTTTGCGGAGTGGCAGCAGAGTCCGTTTGCCCTGGAAAACAAATGTCCAC	100505666	intronic antisense	NM_001261466	ADAM15	disintegrin and metalloproteinase domain-containing protein 15 isoform 9 preproprotein	+	155023747	155031159	557.992	40.1741	8.18367	4.80545
ASHGA5P025864	10.3979	10.3979	3.37822	up	noncoding	NR_040773	LOC100505666	RefSeq	1202	chr1	-	155017667	155036467		CCAGCACCATCTTTGCGGAGTGGCAGCAGAGTCCGTTTGCCCTGGAAAACAAATGTCCAC	100505666	intronic antisense	NM_003815	ADAM15	disintegrin and metalloproteinase domain-containing protein 15 isoform 2 preproprotein	+	155023747	155035252	557.992	40.1741	8.18367	4.80545
ASHGA5P025864	10.3979	10.3979	3.37822	up	noncoding	NR_040773	LOC100505666	RefSeq	1202	chr1	-	155017667	155036467		CCAGCACCATCTTTGCGGAGTGGCAGCAGAGTCCGTTTGCCCTGGAAAACAAATGTCCAC	100505666	intronic antisense	NM_207191	ADAM15	disintegrin and metalloproteinase domain-containing protein 15 isoform 1 preproprotein	+	155023747	155035252	557.992	40.1741	8.18367	4.80545
ASHGA5P025864	10.3979	10.3979	3.37822	up	noncoding	NR_040773	LOC100505666	RefSeq	1202	chr1	-	155017667	155036467		CCAGCACCATCTTTGCGGAGTGGCAGCAGAGTCCGTTTGCCCTGGAAAACAAATGTCCAC	100505666	intronic antisense	NM_207194	ADAM15	disintegrin and metalloproteinase domain-containing protein 15 isoform 3 preproprotein	+	155023747	155035252	557.992	40.1741	8.18367	4.80545
ASHGA5P025864	10.3979	10.3979	3.37822	up	noncoding	NR_040773	LOC100505666	RefSeq	1202	chr1	-	155017667	155036467		CCAGCACCATCTTTGCGGAGTGGCAGCAGAGTCCGTTTGCCCTGGAAAACAAATGTCCAC	100505666	intronic antisense	NM_207195	ADAM15	disintegrin and metalloproteinase domain-containing protein 15 isoform 4 preproprotein	+	155023747	155035252	557.992	40.1741	8.18367	4.80545
ASHGA5P025864	10.3979	10.3979	3.37822	up	noncoding	NR_040773	LOC100505666	RefSeq	1202	chr1	-	155017667	155036467		CCAGCACCATCTTTGCGGAGTGGCAGCAGAGTCCGTTTGCCCTGGAAAACAAATGTCCAC	100505666	intronic antisense	NM_207196	ADAM15	disintegrin and metalloproteinase domain-containing protein 15 isoform 5 preproprotein	+	155023747	155035252	557.992	40.1741	8.18367	4.80545
ASHGA5P025864	10.3979	10.3979	3.37822	up	noncoding	NR_040773	LOC100505666	RefSeq	1202	chr1	-	155017667	155036467		CCAGCACCATCTTTGCGGAGTGGCAGCAGAGTCCGTTTGCCCTGGAAAACAAATGTCCAC	100505666	intronic antisense	NM_207197	ADAM15	disintegrin and metalloproteinase domain-containing protein 15 isoform 6 preproprotein	+	155023747	155035252	557.992	40.1741	8.18367	4.80545
ASHGA5P025864	10.3979	10.3979	3.37822	up	noncoding	NR_040773	LOC100505666	RefSeq	1202	chr1	-	155017667	155036467		CCAGCACCATCTTTGCGGAGTGGCAGCAGAGTCCGTTTGCCCTGGAAAACAAATGTCCAC	100505666	natural antisense	NM_001143687	DCST1	DC-STAMP domain-containing protein 1 isoform 2	+	155006281	155023406	557.992	40.1741	8.18367	4.80545
ASHGA5P025864	10.3979	10.3979	3.37822	up	noncoding	NR_040773	LOC100505666	RefSeq	1202	chr1	-	155017667	155036467		CCAGCACCATCTTTGCGGAGTGGCAGCAGAGTCCGTTTGCCCTGGAAAACAAATGTCCAC	100505666	natural antisense	NM_005227	EFNA4	ephrin-A4 isoform a precursor	+	155036212	155042029	557.992	40.1741	8.18367	4.80545
ASHGA5P025864	10.3979	10.3979	3.37822	up	noncoding	NR_040773	LOC100505666	RefSeq	1202	chr1	-	155017667	155036467		CCAGCACCATCTTTGCGGAGTGGCAGCAGAGTCCGTTTGCCCTGGAAAACAAATGTCCAC	100505666	natural antisense	NM_152494	DCST1	DC-STAMP domain-containing protein 1 isoform 1	+	155006281	155023406	557.992	40.1741	8.18367	4.80545
ASHGA5P025864	10.3979	10.3979	3.37822	up	noncoding	NR_040773	LOC100505666	RefSeq	1202	chr1	-	155017667	155036467		CCAGCACCATCTTTGCGGAGTGGCAGCAGAGTCCGTTTGCCCTGGAAAACAAATGTCCAC	100505666	natural antisense	NM_182689	EFNA4	ephrin-A4 isoform b precursor	+	155036212	155042029	557.992	40.1741	8.18367	4.80545
ASHGA5P025864	10.3979	10.3979	3.37822	up	noncoding	NR_040773	LOC100505666	RefSeq	1202	chr1	-	155017667	155036467		CCAGCACCATCTTTGCGGAGTGGCAGCAGAGTCCGTTTGCCCTGGAAAACAAATGTCCAC	100505666	natural antisense	NM_182690	EFNA4	ephrin-A4 isoform c precursor	+	155036212	155042029	557.992	40.1741	8.18367	4.80545
ASHGA5P053854	3.15867	3.15867	1.65932	up	noncoding	uc004bxx.3	LOC100506190	UCSC_knowngene	1577	chr9	+	132250938	132266538	uc004bxv.3, uc004bxw.3	AGATCCATCGGTGAGCTCCCGCCTGCCACCTCTGGGCCTGCATTGCGGTGATAGGGCCAA	100506190	intergenic							251.526	65.3501	7.21728	5.55796
ASHGA5P021014	3.99326	3.99326	1.99757	up	noncoding	ENST00000523411	RP11-419C23.1	GENCODE	639	chr8	-	36924958	36926936		ATCTTCCTCGAAAAAGTCCTCAGGGTGCAAAGAAGAGAAATGCAATAAAATGATAATGAG		intergenic							24.1885	5	4.31882	2.32125
ASHGA5P045793	3.82839	3.82839	1.93674	up	noncoding	NR_040253	LOC282980	RefSeq	2097	chr10	-	2047666	2056542		TGCCATCACACAGAAGAGAGAACTTACCAAGCAATACCAACACATTCATTCTCCAATAAA	282980	intergenic							32.6489	10.1282	4.72866	2.79192
ASHGA5P017980	20.3907	20.3907	4.34984	up	noncoding	ENST00000447883	RP11-277L2.3	GENCODE	561	chr1	-	149576590	149577296		CTCAAAGCTGCCACACACGTCGCGGTCAGAGAACTGGGAAGGGGGCGCTGGGTCCGAGGT		intergenic							1834.4	54.5917	9.62792	5.27807
ASHGA5P028312	20.2436	20.2436	4.33939	up	noncoding	ENST00000544667	RP11-465L8.1	GENCODE	548	chr12	+	118327258	118328813		TGCTACATGGTTCATCACTGTCATCCCTCCCTTCAGAAAAATTAAATCATTCAAAGGTCA		intronic antisense	NM_173598	KSR2	kinase suppressor of Ras 2	-	117890816	118406028	36063.4	1038.58	14.3226	9.98322
ASHGA5P037178	116.681	116.681	6.86642	up	noncoding	uc002ygw.3	BC002534	UCSC_knowngene	1075	chr20	+	62439441	62454360		TTTAAAGACATGTCCACAGGAAGATGCACCATCAGTCAACGGCTGCTGTTAGGAGAAACA		intronic antisense	ENST00000245663	ZBTB46	zinc finger and BTB domain containing 46 [Source:HGNC Symbol;Acc:16094]	-	62375018	62462567	1312.68	5	9.18768	2.32125
ASHGA5P037178	116.681	116.681	6.86642	up	noncoding	uc002ygw.3	BC002534	UCSC_knowngene	1075	chr20	+	62439441	62454360		TTTAAAGACATGTCCACAGGAAGATGCACCATCAGTCAACGGCTGCTGTTAGGAGAAACA		intronic antisense	ENST00000302995	ZBTB46	zinc finger and BTB domain containing 46 [Source:HGNC Symbol;Acc:16094]	-	62375877	62462597	1312.68	5	9.18768	2.32125
ASHGA5P036714	2.82676	2.82676	1.49915	up	noncoding	NR_045951	VSX1	RefSeq	2163	chr20	-	25051520	25063015	NR_045948	ATTGTCAAATGGATGAGAAACTCAGAGCCAAGGATCGGGAAAACACCCTTAAAGAACGAG	30813	exon sense-overlapping	NM_001256271	VSX1	visual system homeobox 1 isoform c	-	25051520	25063015	16.6564	5	3.8204	2.32125
ASHGA5P036714	2.82676	2.82676	1.49915	up	noncoding	NR_045951	VSX1	RefSeq	2163	chr20	-	25051520	25063015	NR_045948	ATTGTCAAATGGATGAGAAACTCAGAGCCAAGGATCGGGAAAACACCCTTAAAGAACGAG	30813	exon sense-overlapping	NM_001256272	VSX1	visual system homeobox 1 isoform d	-	25051520	25063015	16.6564	5	3.8204	2.32125
ASHGA5P036714	2.82676	2.82676	1.49915	up	noncoding	NR_045951	VSX1	RefSeq	2163	chr20	-	25051520	25063015	NR_045948	ATTGTCAAATGGATGAGAAACTCAGAGCCAAGGATCGGGAAAACACCCTTAAAGAACGAG	30813	exon sense-overlapping	NM_014588	VSX1	visual system homeobox 1 isoform a	-	25056071	25063015	16.6564	5	3.8204	2.32125
ASHGA5P036714	2.82676	2.82676	1.49915	up	noncoding	NR_045951	VSX1	RefSeq	2163	chr20	-	25051520	25063015	NR_045948	ATTGTCAAATGGATGAGAAACTCAGAGCCAAGGATCGGGAAAACACCCTTAAAGAACGAG	30813	exon sense-overlapping	NM_199425	VSX1	visual system homeobox 1 isoform b	-	25059178	25063015	16.6564	5	3.8204	2.32125
ASHGA5P016039	2.36215	2.36215	1.2401	up	noncoding	ENST00000426122	AC017076.4	GENCODE	579	chr2	-	7053757	7058798		GGAGGCTGGGGACACAGAGGAATCTGGGGGATATTATGGTTCTGGGAATGTGGAATGTAA		intronic antisense	NM_014746	RNF144A	probable E3 ubiquitin-protein ligase RNF144A	+	7057522	7184309	24.6295	12.6323	4.33998	3.09988
ASHGA5P037858	2.57768	2.57768	1.36607	up	noncoding	ENST00000432032	AP000355.2	GENCODE	480	chr22	+	24912475	24914354		GTCAGCCTGCACTTGTCTCTCTTGTCCTCATTCTTGACTAAATTTCAGTTGAATTTCTTC		intron sense-overlapping	NM_016327	UPB1	beta-ureidopropionase	+	24891250	24922553	618.808	156.978	8.31725	6.95118
ASHGA5P021819	32.9958	32.9958	5.04421	up	noncoding	NR_027391	SLC15A3	RefSeq	1965	chr11	-	60704554	60719257		CAGCTACACGGAGTCCTGGAGATGGAGCGCTTACACTACATCCACCACAACGAGACCGTG	51296	exon sense-overlapping	NM_016582	SLC15A3	solute carrier family 15 member 3	-	60704554	60719257	605.563	13.9973	8.28473	3.24052
ASHGA5P021819	32.9958	32.9958	5.04421	up	noncoding	NR_027391	SLC15A3	RefSeq	1965	chr11	-	60704554	60719257		CAGCTACACGGAGTCCTGGAGATGGAGCGCTTACACTACATCCACCACAACGAGACCGTG	51296	natural antisense	NM_017870	TMEM132A	transmembrane protein 132A isoform a precursor	+	60691912	60704631	605.563	13.9973	8.28473	3.24052
ASHGA5P021819	32.9958	32.9958	5.04421	up	noncoding	NR_027391	SLC15A3	RefSeq	1965	chr11	-	60704554	60719257		CAGCTACACGGAGTCCTGGAGATGGAGCGCTTACACTACATCCACCACAACGAGACCGTG	51296	natural antisense	NM_178031	TMEM132A	transmembrane protein 132A isoform b precursor	+	60691912	60704631	605.563	13.9973	8.28473	3.24052
ASHGA5P026069	5.67424	5.67424	2.50443	up	noncoding	ENST00000526377	RP11-713P17.4	GENCODE	1130	chr11	-	133905726	133907002		GTATGTACAGGCCTAAAAACAGAATACACATCCTACATGACATGTACACATGTGCACACA		intergenic							132.055	22.6973	6.4505	3.94607
ASHGA5P057667	2.63757	2.63757	1.39921	up	noncoding	TCONS_00020551	XLOC_009864	LincRNAs identified by Cabili et al	494	chr12	+	104781714	104795844		AATTGCATTTGAACTAGTTGAGATCCTGATACAGGGCCCATGGACAAACCACACATGCCA		intergenic							16.2219	6.18802	3.78265	2.38344
ASHGA5P035544	13.2863	13.2863	3.73187	up	noncoding	TCONS_00004303	XLOC_002153	LincRNAs identified by Cabili et al	272	chr2	-	71063564	71088005		TCTCCTGGCTTGGCCTCTGGGACTGGTTTAGGAGGAGGATTTGCAAGTAAGGAGGAGAGC		intergenic							155.997	11.1254	6.65214	2.92027
ASHGA5P020797	6.3033	6.3033	2.65611	up	noncoding	ENST00000519978	RP11-346L1.2	GENCODE	836	chr8	-	37483532	37531905		AAGATACTGAAGACATTTACCCTCATCCCTATCCTCCCTGTGCAAGTGTCTTTCAGTTAC		intergenic							6096.92	452.514	11.3048	8.64864
ASHGA5P056978	2.00588	2.00588	1.00424	up	noncoding	TCONS_00011737	XLOC_005203	LincRNAs identified by Cabili et al	988	chr6	+	23416371	23455725		CAAAAAGGCCAGAAGGTCTCGCCCCACAGCAAATTAGAAGTTAATTTGCATGAGAGCAAG		intergenic							22.2228	13.6455	4.21143	3.20719
ASHGA5P056817	859.027	859.027	9.74656	up	noncoding	TCONS_00008982	XLOC_003839	LincRNAs identified by Cabili et al	232	chr4	+	190198382	190198838	TCONS_00008385, TCONS_00008387, TCONS_00008983	ACATCGTAGGTGACAGGCTCTCATAGTCACCATCATCAAGGGAATCTTGTGCATGTTACA		intergenic							44433.6	44.8086	14.7238	4.97719
ASHGA5P044430	3.02778	3.02778	1.59826	up	noncoding	ENST00000521696	RP11-410L14.2	GENCODE	380	chr8	-	100008990	100025272		CGCTGGTTCGATGCAGAGGAAGAAACCACACCTAGCACGTAAAGCCCTGAAAAAATAGAG		bidirectional	NM_015243	VPS13B	vacuolar protein sorting-associated protein 13B isoform 3	+	100025493	100222015	17.8208	5	3.91951	2.32125
ASHGA5P044430	3.02778	3.02778	1.59826	up	noncoding	ENST00000521696	RP11-410L14.2	GENCODE	380	chr8	-	100008990	100025272		CGCTGGTTCGATGCAGAGGAAGAAACCACACCTAGCACGTAAAGCCCTGAAAAAATAGAG		bidirectional	NM_017890	VPS13B	vacuolar protein sorting-associated protein 13B isoform 5	+	100025493	100889814	17.8208	5	3.91951	2.32125
ASHGA5P044430	3.02778	3.02778	1.59826	up	noncoding	ENST00000521696	RP11-410L14.2	GENCODE	380	chr8	-	100008990	100025272		CGCTGGTTCGATGCAGAGGAAGAAACCACACCTAGCACGTAAAGCCCTGAAAAAATAGAG		bidirectional	NM_152564	VPS13B	vacuolar protein sorting-associated protein 13B isoform 1	+	100025493	100889814	17.8208	5	3.91951	2.32125
ASHGA5P044430	3.02778	3.02778	1.59826	up	noncoding	ENST00000521696	RP11-410L14.2	GENCODE	380	chr8	-	100008990	100025272		CGCTGGTTCGATGCAGAGGAAGAAACCACACCTAGCACGTAAAGCCCTGAAAAAATAGAG		bidirectional	NM_181661	VPS13B	vacuolar protein sorting-associated protein 13B isoform 4	+	100025493	100133987	17.8208	5	3.91951	2.32125
ASHGA5P014565	3.90397	3.90397	1.96494	up	noncoding	ENST00000457770	PCBP1-AS1	GENCODE	547	chr2	-	70245198	70313406	ENST00000411429, ENST00000413791, ENST00000421843, ENST00000422515, ENST00000452431, ENST00000458698	CTGCCTGGAGCCTCACACATGACTCGCCTCCTCTCAGTGACCACAGGTGAGACGTGGTCT	400960	intergenic							3781.54	453.01	10.6172	8.65222
ASHGA5P054659	3.64538	3.64538	1.86607	up	noncoding	NR_029409	LOC255512	RefSeq	1024	chr11	+	1330937	1331937		TGCTCTCTCCTCGAGCCCTGCAGCCCGGCGAAATGGCTCCCGGCGGGGCCGTTTGCGCAT	255512	bidirectional	NM_019009	TOLLIP	toll-interacting protein	-	1295597	1330892	1768.46	250.88	9.57012	7.70406
ASHGA5P056294	2.57273	2.57273	1.3633	up	noncoding	TCONS_00001898	XLOC_001286	LincRNAs identified by Cabili et al	1334	chr1	-	244210525	244212010		ACAAAGACGTGGAAATGTCTGCCGTCAAGAAATTGGAAATCGTATCGAGAACCCAGACTG		intergenic							15.146	5	3.68455	2.32125
ASHGA5P045567	2.05372	2.05372	1.03824	up	noncoding	TCONS_00001785	XLOC_001174	LincRNAs identified by Cabili et al	626	chr1	-	207097099	207097924		TAGAGTGTGCACACACACACTCATAGCCACACACCACGCAGTGACACACACTCATAACTA		intergenic							125988	51711.3	16.5532	15.5149
ASHGA5P020270	2.05825	2.05825	1.04142	up	noncoding	ENST00000510692	RP11-423H2.1	GENCODE	551	chr5	+	177259752	177309517		GAAGGAACATGTCAAAGAAAACAATTATCGGGGACATGGGGATAGTGTGGACCAGCTTTG		intergenic							11.9005	5	3.36267	2.32125
ASHGA5P047741	23.1442	23.1442	4.53258	up	noncoding	ENST00000447943	RP11-78A18.2	GENCODE	299	chr10	+	123495817	123499245		TCACACACCGATAATGCTGACATATAACAGTTTCCGTATCTTTACAAAGGCAATAAATGG		intergenic							185.355	5	6.85383	2.32125
ASHGA5P030618	5.46595	5.46595	2.45047	up	noncoding	ENST00000558269	RP11-352D13.5	GENCODE	561	chr15	+	69571013	69580903		TGGGTCTTCTCCTGAGCCTGAGAGCAGTGCTTCTTCCAATGGCACTGCTTCCATTTTAAG		intergenic							52.8228	10.8793	5.34057	2.8901
ASHGA5P026428	76.5287	76.5287	6.25793	up	noncoding	BG273004		LincRNAs identified by Khalil et al	332	chr6	-	14168333	14168655		GGCTCTCTACATAAAGTCCACGAAAGCATCACCTTTATCAGTTTCATTTATTGTTATATG		intergenic							1955.89	16.3239	9.71787	3.45994
ASHGA5P020212	13.5458	13.5458	3.75978	up	noncoding	ENST00000509713	RP11-553P9.2	GENCODE	284	chr4	+	136013548	136018804		CCGTGTCAAGCTCTTCCTCTTGTTGACTGGAACACAGAAAATTACTATCATCTGCACCAC		intergenic							4014.23	156.182	10.7019	6.94214
ASHGA5P057679	4.66747	4.66747	2.22264	up	noncoding	TCONS_00020677	XLOC_009982	LincRNAs identified by Cabili et al	603	chr12	-	3865740	3867330		AGGACTCCAGATTTGTAAAAACCTCTTCCAGTCTCCTGCTTGGTTCTTCTGTTCCTCTCT		intergenic							1238.16	150.919	9.10734	6.8847
ASHGA5P035955	49.8331	49.8331	5.63903	up	noncoding	ENST00000451622	AC007099.1	GENCODE	1101	chr2	+	75767864	75769832		AGCAATAAAAACAGAAGACACCAACACCAGCAGTCCAGAGACCTCCAGTATAACATAAAG		intronic antisense	NM_001135032	FAM176A	protein FAM176A	-	75719443	75788092	4123.63	48.6476	10.7466	5.10754
ASHGA5P035955	49.8331	49.8331	5.63903	up	noncoding	ENST00000451622	AC007099.1	GENCODE	1101	chr2	+	75767864	75769832		AGCAATAAAAACAGAAGACACCAACACCAGCAGTCCAGAGACCTCCAGTATAACATAAAG		intronic antisense	NM_032181	FAM176A	protein FAM176A	-	75719443	75796848	4123.63	48.6476	10.7466	5.10754
ASHGA5P058726	2.16949	2.16949	1.11736	up	noncoding	uc.67+	uc.67	UCR	217	chr2	+	104736725	104736942		CGGTTTTGATCAAAAGGATTCCAGATCTCACACTAAATTTAGCACCGCTGGCAATTAGTG		intergenic							22.1358	12.5127	4.20511	3.08775
ASHGA5P033681	171.365	171.365	7.42093	up	noncoding	ENST00000575722	RP11-849I19.1	GENCODE	1256	chr18	-	76736554	76738843		CACCACATGACCACTGTCTATTAATATTGTCATACCTAAACACTCGCAAAAACAAAAGTT		intergenic							4915.73	17.7464	11.0019	3.58101
ASHGA5P032219	2.04053	2.04053	1.02894	up	noncoding	TCONS_00029527	XLOC_014172	LincRNAs identified by Cabili et al	478	chr22	+	23834997	23838909		AAGGCCTTCCAAGCTCAAAGACTGAGAAGATGCGGTGTGGCCAGGACCCTGCTAGAGTGA		intergenic							93.7546	45.7359	6.03709	5.00815
ASHGA5P049307	14.2958	14.2958	3.83752	up	noncoding	ENST00000500612	RP11-510M2.2	GENCODE	2793	chr16	+	71496180	71499844		CTCTCTAAATAACCACAAAGCTCCTACTCCTACTTCAGACATATCAGAAAAATGAGATAA		natural antisense	ENST00000357254	ZNF23	zinc finger protein 23 (KOX 16) [Source:HGNC Symbol;Acc:13023]	-	71481499	71496662	530.524	28.5167	8.12137	4.28385
ASHGA5P049307	14.2958	14.2958	3.83752	up	noncoding	ENST00000500612	RP11-510M2.2	GENCODE	2793	chr16	+	71496180	71499844		CTCTCTAAATAACCACAAAGCTCCTACTCCTACTTCAGACATATCAGAAAAATGAGATAA		natural antisense	ENST00000567225	ZNF19	zinc finger protein 19 [Source:HGNC Symbol;Acc:12981]	-	71498452	71516039	530.524	28.5167	8.12137	4.28385
ASHGA5P049307	14.2958	14.2958	3.83752	up	noncoding	ENST00000500612	RP11-510M2.2	GENCODE	2793	chr16	+	71496180	71499844		CTCTCTAAATAACCACAAAGCTCCTACTCCTACTTCAGACATATCAGAAAAATGAGATAA		natural antisense	ENST00000567340	ZNF23	zinc finger protein 23 (KOX 16) [Source:HGNC Symbol;Acc:13023]	-	71487206	71496998	530.524	28.5167	8.12137	4.28385
ASHGA5P021688	117.391	117.391	6.87517	up	noncoding	ENST00000538219	RP11-118B22.4	GENCODE	224	chr12	+	9399092	9410556		CTACCCATCATTAACAGTAAAGCAGAAAGAAAACAATCAGTAAGAGATTATATAGACCTA		intergenic							1883.01	10.1306	9.66749	2.79232
ASHGA5P042593	4.27198	4.27198	2.09491	up	noncoding	ENST00000420595	RP11-259P20.1	GENCODE	743	chr6	+	116813459	116818255		AAACAGATCCAGGCTCCTAACAGCTAATAAATGAAACTGAGAGGTTTGAGAAGACAATAA		natural antisense	NM_001139444	BET3L	trafficking protein particle complex subunit 3-like protein	-	116817650	116866773	26.0283	5	4.41616	2.32125
ASHGA5P056161	6.88814	6.88814	2.78411	up	noncoding	uc001yie.3	MEG3	UCSC_knowngene	1733	chr14	+	101292444	101327360	ENST00000398461, ENST00000455531, ENST00000519709, ENST00000520714, ENST00000522618, ENST00000522771, ENST00000524035, ENST00000524131, NR_033359, NR_046464, NR_046469, NR_046470	CCAGTGCCTCCTCCTGTGGGCCTGGCCTCAGGGCTATGGACAGACTCCTGTCCCATCCCA	55384	intergenic							2146.49	165.616	9.83003	7.04592
ASHGA5P023851	3.85069	3.85069	1.94512	up	noncoding	HMlincRNA750-	HMlincRNA750	LincRNAs identified by Khalil et al	7784	chr5	-	137822391	137830175		TCAAGGACCCTGCACACAGAAGAGAATAAAAGCCCTACCCAAGCAGAGGCCTGGGGTTCC		intergenic							95.4584	25.4924	6.06171	4.1166
ASHGA5P022729	7.40544	7.40544	2.88859	up	noncoding	ENST00000561647	RP11-665J16.1	GENCODE	554	chr15	-	74445140	74471567		AAAGCAGACGGCCTCACAAGATCAAGATCCTCTCTTGCTTCTCTAGAGAATGTGCTCCAT		intronic antisense	NM_005545	ISLR	immunoglobulin superfamily containing leucine-rich repeat protein precursor	+	74466086	74469212	55.1122	7.74987	5.39512	2.50653
ASHGA5P022729	7.40544	7.40544	2.88859	up	noncoding	ENST00000561647	RP11-665J16.1	GENCODE	554	chr15	-	74445140	74471567		AAAGCAGACGGCCTCACAAGATCAAGATCCTCTCTTGCTTCTCTAGAGAATGTGCTCCAT		intronic antisense	NM_201526	ISLR	immunoglobulin superfamily containing leucine-rich repeat protein precursor	+	74466904	74469212	55.1122	7.74987	5.39512	2.50653
ASHGA5P054463	2.66445	2.66445	1.41384	up	noncoding	ENST00000429104	RP11-324H6.6	GENCODE	562	chr10	+	51732522	51741130		CAACTGGGTATTTGGGTTCTTTTTCTATTCACTCATGTCAGATAGAGACATGCATGTTGT		exon sense-overlapping	ENST00000429265	TIMM23B	translocase of inner mitochondrial membrane 23 homolog B (yeast) [Source:HGNC Symbol;Acc:23581]	+	51371426	51732941	15.6818	5	3.73509	2.32125
ASHGA5P036880	13.1938	13.1938	3.72179	up	noncoding	ENST00000435412	C20orf90	GENCODE	332	chr20	-	61326375	61331832		TTGGAGTTGGAGCAGGAAGCTGAGGGTCTTGTCATGCCCGCCCTTCCTTCCACGTGGCTC		intergenic							512.304	29.8489	8.07604	4.35425
ASHGA5P022098	15.1818	15.1818	3.92427	up	noncoding	ENST00000549058	RP11-314D7.4	GENCODE	408	chr12	-	73605191	74335956		TGGTTATATCACATTCCAGAATTCCTTCCTCTGAGAGCGGGACAGGATCCTCTCTAGAAT		intergenic							967.489	42.7851	8.82733	4.90306
ASHGA5P055655	3.88406	3.88406	1.95756	up	noncoding	ENST00000469928	RPS27P25	pseudogene	248	chr12	+	120809190	120809438		CTCTCGACAGGGATCTCCTTCATCCTTCTCCAGAAGAGAAGAGGAAACAGAAGAAGAAAC									189.356	43.4218	6.88539	4.92783
ASHGA5P012061	8.90252	8.90252	3.15421	up	noncoding	ENST00000375465	BPIFA4P	GENCODE	1203	chr20	+	31781410	31798268	ENST00000420169, uc002wyq.2	CTCCTTAATGATTTGACTCAAGGACTCCTCAGGGCAGACTTTCTTCCCAGCCTGCAGACA	317716	intergenic							162.368	17.2979	6.69448	3.54027
ASHGA5P036912	3.40113	3.40113	1.76602	up	noncoding	ENST00000412497	RP11-314N13.3	GENCODE	480	chr20	+	1342265	1343229		ATCCACCACTCTTGCCCTTGTTTCACTTATCTATTGCTGTGAAATAAACTTCAAAACCAA		intergenic							3249.98	445.852	10.3913	8.62533
ASHGA5P042131	18.2655	18.2655	4.19105	up	noncoding	ENST00000455607	RP11-350J20.5	GENCODE	436	chr6	-	150118391	150119308		GACCACTCACTGCACAATTCTCTCCCTCATATGCATATTTTATTTTCCTTCCAATAGATA		intronic antisense	NM_001252049	PCMT1	protein-L-isoaspartate(D-aspartate) O-methyltransferase isoform 2	+	150070830	150132557	33592.3	1060.53	14.1959	10.0049
ASHGA5P042131	18.2655	18.2655	4.19105	up	noncoding	ENST00000455607	RP11-350J20.5	GENCODE	436	chr6	-	150118391	150119308		GACCACTCACTGCACAATTCTCTCCCTCATATGCATATTTTATTTTCCTTCCAATAGATA		intronic antisense	NM_001252050	PCMT1	protein-L-isoaspartate(D-aspartate) O-methyltransferase isoform 3	+	150070830	150132557	33592.3	1060.53	14.1959	10.0049
ASHGA5P042131	18.2655	18.2655	4.19105	up	noncoding	ENST00000455607	RP11-350J20.5	GENCODE	436	chr6	-	150118391	150119308		GACCACTCACTGCACAATTCTCTCCCTCATATGCATATTTTATTTTCCTTCCAATAGATA		intronic antisense	NM_001252051	PCMT1	protein-L-isoaspartate(D-aspartate) O-methyltransferase isoform 4	+	150070830	150132557	33592.3	1060.53	14.1959	10.0049
ASHGA5P042131	18.2655	18.2655	4.19105	up	noncoding	ENST00000455607	RP11-350J20.5	GENCODE	436	chr6	-	150118391	150119308		GACCACTCACTGCACAATTCTCTCCCTCATATGCATATTTTATTTTCCTTCCAATAGATA		intronic antisense	NM_001252052	PCMT1	protein-L-isoaspartate(D-aspartate) O-methyltransferase isoform 5	+	150070830	150132557	33592.3	1060.53	14.1959	10.0049
ASHGA5P042131	18.2655	18.2655	4.19105	up	noncoding	ENST00000455607	RP11-350J20.5	GENCODE	436	chr6	-	150118391	150119308		GACCACTCACTGCACAATTCTCTCCCTCATATGCATATTTTATTTTCCTTCCAATAGATA		intronic antisense	NM_001252053	PCMT1	protein-L-isoaspartate(D-aspartate) O-methyltransferase isoform 1	+	150070830	150123667	33592.3	1060.53	14.1959	10.0049
ASHGA5P042131	18.2655	18.2655	4.19105	up	noncoding	ENST00000455607	RP11-350J20.5	GENCODE	436	chr6	-	150118391	150119308		GACCACTCACTGCACAATTCTCTCCCTCATATGCATATTTTATTTTCCTTCCAATAGATA		intronic antisense	NM_005389	PCMT1	protein-L-isoaspartate(D-aspartate) O-methyltransferase isoform 1	+	150070830	150132557	33592.3	1060.53	14.1959	10.0049
ASHGA5P019698	3.27039	3.27039	1.70946	up	noncoding	ENST00000500695	RP11-637A17.2	GENCODE	1733	chr12	-	69068150	69080639	ENST00000502102, NR_038930	GTTTTGGGCTCACACCATTGATACATTTGATCCTTAAGGCAAGCCCACCCCGCCTCACTC		natural antisense	ENST00000229179	NUP107	nucleoporin 107kDa [Source:HGNC Symbol;Acc:29914]	+	69080513	69136785	381.433	87.1852	7.71944	6.00998
ASHGA5P035173	2.62724	2.62724	1.39355	up	noncoding	ENST00000431244	AC159540.1	GENCODE	669	chr2	-	98088088	98088849		ACCCTAAGCTTTGTTTCTCTCCTGTCACTTTGCTCCTATTTCTTTCATGTGAAAGAATGT		intergenic							629.905	156.685	8.34093	6.94738
ASHGA5P042994	562.457	562.457	9.1356	up	noncoding	uc010kwx.1	AAA1	UCSC_knowngene	506	chr7	-	34743465	34800803		GCGCCAAAAAATATGTTTTCTTTCTTTTCTTTGTTGAACACTCATCGGGAGTTACTCTTA	404744	intronic antisense	NM_207172	NPSR1	neuropeptide S receptor isoform A	+	34697896	34889590	6774.47	5	11.4569	2.32125
ASHGA5P042994	562.457	562.457	9.1356	up	noncoding	uc010kwx.1	AAA1	UCSC_knowngene	506	chr7	-	34743465	34800803		GCGCCAAAAAATATGTTTTCTTTCTTTTCTTTGTTGAACACTCATCGGGAGTTACTCTTA	404744	intronic antisense	NM_207173	NPSR1	neuropeptide S receptor isoform B	+	34697896	34917944	6774.47	5	11.4569	2.32125
ASHGA5P052862	10.5312	10.5312	3.39659	up	noncoding	ENST00000418837	RP11-557H15.4	GENCODE	892	chr6	-	134846462	134861482		ATTTCAATGAACATTGTGTTTCAAAGCCCGCTTCCTCTTGCTCGGTAAGAGCTGCAGAAG		intergenic							233.601	19.7558	7.13635	3.73976
ASHGA5P048566	6.6128	6.6128	2.72526	up	noncoding	TCONS_00002797	XLOC_001320	LincRNAs identified by Cabili et al	472	chr2	+	2875862	2876529		GCTCCAGTTTCTTCGTTTGCAAAATGGGATCCTCAGAGACACCCACCTGGCCCTTTCACA		intergenic							1124.77	102.788	8.9982	6.27294
ASHGA5P052348	9.43757	9.43757	3.23842	up	noncoding	ENST00000510145	LINC00491	GENCODE	944	chr5	-	101944859	102007263	uc003knr.1	TTCATTAGTCAGAAAAAGGGAAAATACCACCACCCCATCCTGGAATGGCAGTCATGTACA		intergenic							17993.4	946.324	13.0784	9.83995
ASHGA5P018663	7.27559	7.27559	2.86307	up	noncoding	NR_037710	FAM161A	RefSeq	3647	chr2	-	62051982	62081278		ACTCTTCCAGAGCCTGATTTAGGCCAGTCTTCCTCCTTGTATGTGTCCTCCTCTGAAGAG	84140	exon sense-overlapping	NM_001201543	FAM161A	protein FAM161A isoform 1	-	62051982	62081278	12184	779.447	12.3969	9.53383
ASHGA5P018663	7.27559	7.27559	2.86307	up	noncoding	NR_037710	FAM161A	RefSeq	3647	chr2	-	62051982	62081278		ACTCTTCCAGAGCCTGATTTAGGCCAGTCTTCCTCCTTGTATGTGTCCTCCTCTGAAGAG	84140	exon sense-overlapping	NM_032180	FAM161A	protein FAM161A isoform 2	-	62051982	62081278	12184	779.447	12.3969	9.53383
ASHGA5P019331	5.6288	5.6288	2.49283	up	noncoding	NR_033686	PEF1	RefSeq	1696	chr1	-	32095462	32110838		AATCACCATGGCCAGCTATCCTTACCGGCAGGTGGCGCCCCTCCCAATGTGGATCCTGAG	553115	exon sense-overlapping	NM_012392	PEF1	peflin	-	32095462	32110838	549.93	70.1353	8.1669	5.67407
ASHGA5P022078	2.00385	2.00385	1.00277	up	noncoding	ENST00000548564	RP5-1057I20.2	GENCODE	573	chr12	+	48225157	48231681		GAGGAGTGTGTTCTGGTAGATATCATGGAGCAGGAGTCCCTAGCACCAAGAAGCTGAGAT		intronic antisense	ENST00000434070	HDAC7	histone deacetylase 7 [Source:HGNC Symbol;Acc:14067]	-	48191166	48226915	26.7374	16.2343	4.45523	3.45245
ASHGA5P043835	107.291	107.291	6.74539	up	noncoding	ENST00000447336	RP11-645N11.3	GENCODE	333	chr7	+	102670550	102671801		AGTCGCTGCATATTGTTTAACTGCTTCTGACTGAAAAATATTCTTCCTCTCACCTTTTAA		intronic antisense	NM_001111038	FBXL13	F-box/LRR-repeat protein 13 isoform 2	-	102453307	102715288	2962.13	16.93	10.2545	3.50915
ASHGA5P043835	107.291	107.291	6.74539	up	noncoding	ENST00000447336	RP11-645N11.3	GENCODE	333	chr7	+	102670550	102671801		AGTCGCTGCATATTGTTTAACTGCTTCTGACTGAAAAATATTCTTCCTCTCACCTTTTAA		intronic antisense	NM_145032	FBXL13	F-box/LRR-repeat protein 13 isoform 1	-	102453307	102715015	2962.13	16.93	10.2545	3.50915
ASHGA5P045761	113.326	113.326	6.82433	up	noncoding	ENST00000429567	RP11-470P21.2	GENCODE	443	chr9	+	72087381	72109429		GCCACACAAATAATGCATTTCTCACCATCAAAAAGCTTCTGAAGCCATGTTCTCAAAGGC		intronic antisense	NM_001163	APBA1	amyloid beta A4 precursor protein-binding family A member 1	-	72042448	72287275	2923.89	15.8276	10.2374	3.41307
ASHGA5P026923	2.01622	2.01622	1.01165	up	noncoding	ENST00000447864	AP002856.6	GENCODE	562	chr11	+	131074893	131085058		TAAACAGATTAAAGCCAGAATGAGCCAGCTCCTTGCAAACCAGCCATTCTACTCCTGATG		intergenic							205.269	84.749	6.97762	5.96596
ASHGA5P043470	2.2857	2.2857	1.19264	up	noncoding	ENST00000453798	AC073094.4	GENCODE	433	chr7	+	1306988	1308903		AGGGAAGAGAAAGGCTCCAACCTTGACCCTGTCAAATAAATATCTCTAACTTTTTCTGTC		intergenic							55.1558	26.9992	5.39656	4.20392
ASHGA5P045427	448.071	448.071	8.80758	up	noncoding	ENST00000449730	RP11-281A20.1	GENCODE	625	chr9	-	120602599	120659534		TCTTCTTTCTTTCCTATTGTTCATAAACATGGTATTAAAATGACCACTAAAGAGCAGAAA		intergenic							14334.9	21.673	12.6896	3.88202
ASHGA5P047092	2.45554	2.45554	1.29604	up	noncoding	ENST00000369391	RP11-57H14.2	GENCODE	460	chr10	-	114710404	114711634		TTTTTCACCCACCAGCAGCAATTTTGGAAGAAAAATGAAGGAGGAAGAAAAGCCAAAAAA		natural antisense	NM_001146274	TCF7L2	transcription factor 7-like 2 isoform 1	+	114710008	114927436	32.1944	15.8428	4.71151	3.41547
ASHGA5P047092	2.45554	2.45554	1.29604	up	noncoding	ENST00000369391	RP11-57H14.2	GENCODE	460	chr10	-	114710404	114711634		TTTTTCACCCACCAGCAGCAATTTTGGAAGAAAAATGAAGGAGGAAGAAAAGCCAAAAAA		natural antisense	NM_001146283	TCF7L2	transcription factor 7-like 2 isoform 3	+	114710008	114927436	32.1944	15.8428	4.71151	3.41547
ASHGA5P047092	2.45554	2.45554	1.29604	up	noncoding	ENST00000369391	RP11-57H14.2	GENCODE	460	chr10	-	114710404	114711634		TTTTTCACCCACCAGCAGCAATTTTGGAAGAAAAATGAAGGAGGAAGAAAAGCCAAAAAA		natural antisense	NM_001146284	TCF7L2	transcription factor 7-like 2 isoform 4	+	114710008	114927436	32.1944	15.8428	4.71151	3.41547
ASHGA5P047092	2.45554	2.45554	1.29604	up	noncoding	ENST00000369391	RP11-57H14.2	GENCODE	460	chr10	-	114710404	114711634		TTTTTCACCCACCAGCAGCAATTTTGGAAGAAAAATGAAGGAGGAAGAAAAGCCAAAAAA		natural antisense	NM_001146285	TCF7L2	transcription factor 7-like 2 isoform 5	+	114710008	114927436	32.1944	15.8428	4.71151	3.41547
ASHGA5P047092	2.45554	2.45554	1.29604	up	noncoding	ENST00000369391	RP11-57H14.2	GENCODE	460	chr10	-	114710404	114711634		TTTTTCACCCACCAGCAGCAATTTTGGAAGAAAAATGAAGGAGGAAGAAAAGCCAAAAAA		natural antisense	NM_001146286	TCF7L2	transcription factor 7-like 2 isoform 6	+	114710008	114927436	32.1944	15.8428	4.71151	3.41547
ASHGA5P047092	2.45554	2.45554	1.29604	up	noncoding	ENST00000369391	RP11-57H14.2	GENCODE	460	chr10	-	114710404	114711634		TTTTTCACCCACCAGCAGCAATTTTGGAAGAAAAATGAAGGAGGAAGAAAAGCCAAAAAA		natural antisense	NM_001198525	TCF7L2	transcription factor 7-like 2 isoform 7	+	114710008	114927436	32.1944	15.8428	4.71151	3.41547
ASHGA5P047092	2.45554	2.45554	1.29604	up	noncoding	ENST00000369391	RP11-57H14.2	GENCODE	460	chr10	-	114710404	114711634		TTTTTCACCCACCAGCAGCAATTTTGGAAGAAAAATGAAGGAGGAAGAAAAGCCAAAAAA		natural antisense	NM_001198526	TCF7L2	transcription factor 7-like 2 isoform 8	+	114710008	114927436	32.1944	15.8428	4.71151	3.41547
ASHGA5P047092	2.45554	2.45554	1.29604	up	noncoding	ENST00000369391	RP11-57H14.2	GENCODE	460	chr10	-	114710404	114711634		TTTTTCACCCACCAGCAGCAATTTTGGAAGAAAAATGAAGGAGGAAGAAAAGCCAAAAAA		natural antisense	NM_001198527	TCF7L2	transcription factor 7-like 2 isoform 9	+	114710008	114927436	32.1944	15.8428	4.71151	3.41547
ASHGA5P047092	2.45554	2.45554	1.29604	up	noncoding	ENST00000369391	RP11-57H14.2	GENCODE	460	chr10	-	114710404	114711634		TTTTTCACCCACCAGCAGCAATTTTGGAAGAAAAATGAAGGAGGAAGAAAAGCCAAAAAA		natural antisense	NM_001198528	TCF7L2	transcription factor 7-like 2 isoform 10	+	114710008	114927436	32.1944	15.8428	4.71151	3.41547
ASHGA5P047092	2.45554	2.45554	1.29604	up	noncoding	ENST00000369391	RP11-57H14.2	GENCODE	460	chr10	-	114710404	114711634		TTTTTCACCCACCAGCAGCAATTTTGGAAGAAAAATGAAGGAGGAAGAAAAGCCAAAAAA		natural antisense	NM_001198529	TCF7L2	transcription factor 7-like 2 isoform 11	+	114710008	114927436	32.1944	15.8428	4.71151	3.41547
ASHGA5P047092	2.45554	2.45554	1.29604	up	noncoding	ENST00000369391	RP11-57H14.2	GENCODE	460	chr10	-	114710404	114711634		TTTTTCACCCACCAGCAGCAATTTTGGAAGAAAAATGAAGGAGGAAGAAAAGCCAAAAAA		natural antisense	NM_001198530	TCF7L2	transcription factor 7-like 2 isoform 12	+	114710008	114927436	32.1944	15.8428	4.71151	3.41547
ASHGA5P047092	2.45554	2.45554	1.29604	up	noncoding	ENST00000369391	RP11-57H14.2	GENCODE	460	chr10	-	114710404	114711634		TTTTTCACCCACCAGCAGCAATTTTGGAAGAAAAATGAAGGAGGAAGAAAAGCCAAAAAA		natural antisense	NM_001198531	TCF7L2	transcription factor 7-like 2 isoform 13	+	114710008	114927436	32.1944	15.8428	4.71151	3.41547
ASHGA5P047092	2.45554	2.45554	1.29604	up	noncoding	ENST00000369391	RP11-57H14.2	GENCODE	460	chr10	-	114710404	114711634		TTTTTCACCCACCAGCAGCAATTTTGGAAGAAAAATGAAGGAGGAAGAAAAGCCAAAAAA		natural antisense	NM_030756	TCF7L2	transcription factor 7-like 2 isoform 2	+	114710008	114927436	32.1944	15.8428	4.71151	3.41547
ASHGA5P031711	44.3662	44.3662	5.47139	up	noncoding	ENST00000568775	IGHV3OR16-6	GENCODE	534	chr16	+	32926778	32928163		TCTCTTCTTCCAGAGCACACCCTGTTTGAGGGGGAGATGTCATCTCTGCCCTTGAGGAGC		intergenic							2543.65	34.6734	10.0491	4.5777
ASHGA5P046658	551.417	551.417	9.107	up	noncoding	ENST00000440614	RP11-308B5.2	GENCODE	938	chrX	+	133733486	133740284		CATCAAACATGACAGAAGATGCAAGCATTTGGAAACTTACATCAGCCATCATCAAATTAA		intronic antisense	NM_021796	PLAC1	placenta-specific protein 1 precursor	-	133699872	133792513	26535.4	36.5228	13.7687	4.66165
ASHGA5P025888	26.9048	26.9048	4.74979	up	noncoding	NR_045670	PSMC3IP	RefSeq	1379	chr17	-	40724327	40729849	NR_045671	GTTTGACATGAGCTCAAGGAATTATCTAGTGCCCTGACCACACCAGAGATGCAGAAAGAA	29893	exon sense-overlapping	NM_001256014	PSMC3IP	homologous-pairing protein 2 homolog isoform 3	-	40724327	40729734	421.876	12.488	7.83454	3.08475
ASHGA5P025888	26.9048	26.9048	4.74979	up	noncoding	NR_045670	PSMC3IP	RefSeq	1379	chr17	-	40724327	40729849	NR_045671	GTTTGACATGAGCTCAAGGAATTATCTAGTGCCCTGACCACACCAGAGATGCAGAAAGAA	29893	exon sense-overlapping	NM_001256015	PSMC3IP	homologous-pairing protein 2 homolog isoform 4	-	40724327	40729849	421.876	12.488	7.83454	3.08475
ASHGA5P025888	26.9048	26.9048	4.74979	up	noncoding	NR_045670	PSMC3IP	RefSeq	1379	chr17	-	40724327	40729849	NR_045671	GTTTGACATGAGCTCAAGGAATTATCTAGTGCCCTGACCACACCAGAGATGCAGAAAGAA	29893	exon sense-overlapping	NM_001256016	PSMC3IP	homologous-pairing protein 2 homolog isoform 4	-	40724327	40729849	421.876	12.488	7.83454	3.08475
ASHGA5P025888	26.9048	26.9048	4.74979	up	noncoding	NR_045670	PSMC3IP	RefSeq	1379	chr17	-	40724327	40729849	NR_045671	GTTTGACATGAGCTCAAGGAATTATCTAGTGCCCTGACCACACCAGAGATGCAGAAAGAA	29893	exon sense-overlapping	NM_013290	PSMC3IP	homologous-pairing protein 2 homolog isoform 1	-	40724327	40729849	421.876	12.488	7.83454	3.08475
ASHGA5P025888	26.9048	26.9048	4.74979	up	noncoding	NR_045670	PSMC3IP	RefSeq	1379	chr17	-	40724327	40729849	NR_045671	GTTTGACATGAGCTCAAGGAATTATCTAGTGCCCTGACCACACCAGAGATGCAGAAAGAA	29893	exon sense-overlapping	NM_016556	PSMC3IP	homologous-pairing protein 2 homolog isoform 2	-	40724327	40729849	421.876	12.488	7.83454	3.08475
ASHGA5P025888	26.9048	26.9048	4.74979	up	noncoding	NR_045670	PSMC3IP	RefSeq	1379	chr17	-	40724327	40729849	NR_045671	GTTTGACATGAGCTCAAGGAATTATCTAGTGCCCTGACCACACCAGAGATGCAGAAAGAA	29893	natural antisense	NM_170607	MLX	max-like protein X isoform gamma	+	40719077	40725221	421.876	12.488	7.83454	3.08475
ASHGA5P025888	26.9048	26.9048	4.74979	up	noncoding	NR_045670	PSMC3IP	RefSeq	1379	chr17	-	40724327	40729849	NR_045671	GTTTGACATGAGCTCAAGGAATTATCTAGTGCCCTGACCACACCAGAGATGCAGAAAGAA	29893	natural antisense	NM_198204	MLX	max-like protein X isoform beta	+	40719077	40725221	421.876	12.488	7.83454	3.08475
ASHGA5P025888	26.9048	26.9048	4.74979	up	noncoding	NR_045670	PSMC3IP	RefSeq	1379	chr17	-	40724327	40729849	NR_045671	GTTTGACATGAGCTCAAGGAATTATCTAGTGCCCTGACCACACCAGAGATGCAGAAAGAA	29893	natural antisense	NM_198205	MLX	max-like protein X isoform alpha	+	40719077	40725221	421.876	12.488	7.83454	3.08475
ASHGA5P029296	3.9402	3.9402	1.97827	up	noncoding	TCONS_00008980	XLOC_003837	LincRNAs identified by Cabili et al	262	chr4	+	189717667	189718050		GAAAACAAAAAATTAACTAAGGCCACACACTAAATGGCCTTTGCACCTCACAGACCCTGC		intergenic							3765.35	448.552	10.6106	8.63234
ASHGA5P000176	36.0731	36.0731	5.17285	up	noncoding	chr1:54700800-54732968+	chr1:54700800-54732968	LincRNAs identified by Khalil et al	32168	chr1	+	54928212	54960380		ATAGCACCCATCCTAACATAGTTTAATCATCCTCAGGAGATTGGCAGCCTCCATCTCTGA		intergenic							37545.4	643.716	14.3908	9.21797
ASHGA5P047168	2.438	2.438	1.2857	up	noncoding	ENST00000439421	RP11-540N6.1	GENCODE	297	chr10	-	132237330	132281418		TTTCTTTTTCAAAAGCGAACAGCTACAGTATCCATCATACTCCAGAGCAGCCCTCAAAGC		intergenic							16.1982	7.59653	3.7817	2.496
ASHGA5P037188	6.40463	6.40463	2.67911	up	noncoding	ENST00000416067	MAFIPL	GENCODE	1599	chr21	-	9907193	9968585	NR_037872, NR_046441	TGGTAGGATCCTTTCATGGCGTCTTCCCAGGACCTCCTGCCAGCTCCCATTGGGAGTTTT		intergenic							1161.93	108.157	9.04046	6.36134
ASHGA5P035557	30.1388	30.1388	4.91355	up	noncoding	TCONS_00003325	XLOC_002175	LincRNAs identified by Cabili et al	371	chr2	-	78825036	78826532		TCCAGGAAAAGGGATTGAGCATTCACCAGCATCTAATTGGGCTGTTGCATTTCTTACTAT		intergenic							255.031	5	7.2348	2.32125
ASHGA5P016257	55.6322	55.6322	5.79785	up	noncoding	ENST00000428649	FAM75C2	pseudogene	3761	chr9	-	90744219	90749900	NM_001145124	TGTGACAACCCACCCTCACCATCGCCTAAGAAGAGAAAGCGTCATCTTGTCTCCCAGCGT									45036.9	552.675	14.7725	8.97466
ASHGA5P022766	6.19636	6.19636	2.63142	up	noncoding	ENST00000565892	RP11-578F21.12	GENCODE	498	chr15	+	29034809	29035450	ENST00000562423, NR_037599	TCCCAGCTCTGTTTGATGTTACTCGTTCCTCAGCAAGTTGGCAAAACAGATATCATGCTG		intergenic							54.7902	9.8969	5.38855	2.75713
ASHGA5P040890	3.72958	3.72958	1.89901	up	noncoding	NR_046113	FLJ16171	RefSeq	2143	chr5	-	174346084	174422734		AACCTAGCTTCCCTATGCAGCAAAGTTCTTGAACAAGGTGCTTACCATCCTATCCTCATT	441116	intergenic							35.0052	11.1164	4.81821	2.91919
ASHGA5P047405	5.20322	5.20322	2.3794	up	noncoding	TCONS_00014981	XLOC_007062	LincRNAs identified by Cabili et al	281	chr8	-	39267714	39274897		TGTATTTGTTACTCTCCTCTCTCCAAGCAGTAGCATTCAAGGTTGTTAGAGACTGGTGCT		intergenic							610.24	82.1438	8.29785	5.91845
ASHGA5P044096	8.03599	8.03599	3.00648	up	noncoding	ENST00000527080	USP17L8	pseudogene	1593	chr8	-	7829182	7830775	ENST00000416902, NM_001242326, NM_001256852, NM_001256853, NM_001256854, NM_001256855, NM_001256860, NM_001256871, NM_001256873, NM_001256874, NM_001256894, NM_201402	TCAAAATACAAGTGTGGGATGAAAAACCACCATCCTGAACAGCAAAGCTCCCTGCTAAAC									1797.47	124.464	9.59512	6.58865
ASHGA5P045529	8.53319	8.53319	3.09309	up	noncoding	ENST00000425189	DBH-AS1	GENCODE	2139	chr9	-	136519707	136522435		ATCAGCCACTGCTGTGATATACTGAGCACCTCCTCTAGAGAGAATAAAGGACTGACAAAG	138948	natural antisense	NM_000787	DBH	dopamine beta-hydroxylase precursor	+	136501484	136524466	239.733	24.7357	7.16133	4.06824
ASHGA5P041530	165.52	165.52	7.37086	up	noncoding	NR_026945	LOC257358	RefSeq	2204	chr5	+	169758434	169762104		GTCTATAGCTCCTCCAGATTCTAGGTATTAATTTACTAAGATATTCCTAAGCCAGAAAAC	257358	intergenic							4666.57	17.4881	10.9288	3.55797
ASHGA5P023908	14.7733	14.7733	3.88492	up	noncoding	HMlincRNA907+	HMlincRNA907	LincRNAs identified by Khalil et al	5934	chr15	+	48164774	48170708		CTTTTTATTCCAGTCTCCATTATCTATTGTCTATTTGTCCAGTTTTGCTAGTGGGTGACA		intergenic							814.545	38.5609	8.6291	4.74418
ASHGA5P051585	26.4018	26.4018	4.72256	up	noncoding	ENST00000485404	RP11-433A10.1	GENCODE	555	chr3	+	72202043	72221401		AAAGAGAATGGTTTGTTTCCTTTCGTCTTCCTCCACGATGCATTTTACGATTGCAGAGGG		intergenic							3570.72	76.8272	10.5341	5.81154
ASHGA5P040721	8.72648	8.72648	3.1254	up	noncoding	TCONS_00022115	XLOC_010723	LincRNAs identified by Cabili et al	6969	chr13	-	111515842	111522929		GAAAAGGACAAAAACAGTAATATACACACCAGTAAGGAACGGCATTGGCATGCTCCGCCT		exon sense-overlapping	ENST00000538077	LINC00346	long intergenic non-protein coding RNA 346 [Source:HGNC Symbol;Acc:27492]	-	111521577	111522162	57.387	5	5.44665	2.32125
ASHGA5P047740	3.70551	3.70551	1.88967	up	noncoding	ENST00000429809	RP11-159H3.2	GENCODE	2864	chr10	+	122938213	122945480		CGTGACCTATTACACATTTCTGAAGAGAAACTCCTCTCACCAGCTCCTTTGTTTCCTAAG		intergenic							550.281	103.198	8.16831	6.27863
ASHGA5P042938	8.97002	8.97002	3.16511	up	noncoding	TCONS_00019646	XLOC_009452	LincRNAs identified by Cabili et al	433	chr11	-	61883943	61891289		ACGCGCGGCTTTCTTTCTTCTCCAAGCACGGTGGCAGTCTTCTGATCTCTGCTGCTTTTT		intergenic							3219.6	182.255	10.3721	7.20703
ASHGA5P043934	3.86707	3.86707	1.95124	up	noncoding	ENST00000454735	AC009784.3	GENCODE	485	chr7	+	136112142	136122158		GATCTCAAGAATTCTAGAAAATGAAAACTGGATTACCATCACCAACGTCTAGGAACTGTG		intergenic							29488.5	3964.28	13.9785	12.0272
ASHGA5P025772	41.8395	41.8395	5.38679	up	noncoding	NR_034151	LOC730227	RefSeq	2741	chr1	-	203267885	203274453		TAAGTTTTCTGCCGTCTTCCTTCCTCATTGTGGTTTGGACCTTCTCGAGAAAGAATCTGG	730227	bidirectional	NM_006763	BTG2	protein BTG2	+	203274663	203278729	24180.3	344.171	13.5932	8.20639
ASHGA5P044101	2.06679	2.06679	1.04739	up	noncoding	ENST00000524008	CTD-3023L14.3	GENCODE	397	chr8	-	8413247	8418475		TTTAATTGGTGGCTTTACTCAGCCATGTTTCTGTTTTTCAAACCCCGGAGTCAGTTGGAC		intergenic							13.8836	7.92913	3.56722	2.51983
ASHGA5P040243	2.60454	2.60454	1.38103	up	noncoding	uc003itk.2	NBLA00301	UCSC_knowngene	1584	chr4	+	174451608	174506879		ATTATTTCAGTCCCATACCCTCACAGCATGAGTACCTGATCTGATAGACTTCTTTGGAAT	79804	bidirectional	NM_021973	HAND2	heart- and neural crest derivatives-expressed protein 2	-	174447651	174451378	11308.2	1885.04	12.2642	10.8832
ASHGA5P020604	17.21	17.21	4.10517	up	noncoding	NR_028494	LYRM2	RefSeq	5513	chr6	-	90341942	90348216	NR_028493	TTTCAGCCCGTTCGTAAGAAGGCAACAAGTTCTTCTCCTCTACAGAAGGATTTTGCAAAC	57226	exon sense-overlapping	NM_020466	LYRM2	LYR motif-containing protein 2	-	90341942	90348474	606.291	26.6256	8.28863	4.18346
ASHGA5P020604	17.21	17.21	4.10517	up	noncoding	NR_028494	LYRM2	RefSeq	5513	chr6	-	90341942	90348216	NR_028493	TTTCAGCCCGTTCGTAAGAAGGCAACAAGTTCTTCTCCTCTACAGAAGGATTTTGCAAAC	57226	natural antisense	NM_001242809	ANKRD6	ankyrin repeat domain-containing protein 6 isoform a	+	90142896	90343553	606.291	26.6256	8.28863	4.18346
ASHGA5P020604	17.21	17.21	4.10517	up	noncoding	NR_028494	LYRM2	RefSeq	5513	chr6	-	90341942	90348216	NR_028493	TTTCAGCCCGTTCGTAAGAAGGCAACAAGTTCTTCTCCTCTACAGAAGGATTTTGCAAAC	57226	natural antisense	NM_001242811	ANKRD6	ankyrin repeat domain-containing protein 6 isoform a	+	90272036	90343553	606.291	26.6256	8.28863	4.18346
ASHGA5P020604	17.21	17.21	4.10517	up	noncoding	NR_028494	LYRM2	RefSeq	5513	chr6	-	90341942	90348216	NR_028493	TTTCAGCCCGTTCGTAAGAAGGCAACAAGTTCTTCTCCTCTACAGAAGGATTTTGCAAAC	57226	natural antisense	NM_001242813	ANKRD6	ankyrin repeat domain-containing protein 6 isoform c	+	90142896	90343553	606.291	26.6256	8.28863	4.18346
ASHGA5P020604	17.21	17.21	4.10517	up	noncoding	NR_028494	LYRM2	RefSeq	5513	chr6	-	90341942	90348216	NR_028493	TTTCAGCCCGTTCGTAAGAAGGCAACAAGTTCTTCTCCTCTACAGAAGGATTTTGCAAAC	57226	natural antisense	NM_001242814	ANKRD6	ankyrin repeat domain-containing protein 6 isoform d	+	90276556	90343553	606.291	26.6256	8.28863	4.18346
ASHGA5P020604	17.21	17.21	4.10517	up	noncoding	NR_028494	LYRM2	RefSeq	5513	chr6	-	90341942	90348216	NR_028493	TTTCAGCCCGTTCGTAAGAAGGCAACAAGTTCTTCTCCTCTACAGAAGGATTTTGCAAAC	57226	natural antisense	NM_014942	ANKRD6	ankyrin repeat domain-containing protein 6 isoform b	+	90142896	90343553	606.291	26.6256	8.28863	4.18346
ASHGA5P020282	7.74474	7.74474	2.95322	up	noncoding	ENST00000510859	AC016683.6	GENCODE	2313	chr2	+	114008342	114024550		GGGGAGACCCACACATATACTCACAGAAATGAGTTATTTAAAGAAGACGGTCCAGATTCC		intronic antisense	NM_003466	PAX8	paired box protein Pax-8 isoform PAX8A	-	113973573	114036498	59.2395	8.15708	5.48833	2.53512
ASHGA5P020282	7.74474	7.74474	2.95322	up	noncoding	ENST00000510859	AC016683.6	GENCODE	2313	chr2	+	114008342	114024550		GGGGAGACCCACACATATACTCACAGAAATGAGTTATTTAAAGAAGACGGTCCAGATTCC		intronic antisense	NM_013952	PAX8	paired box protein Pax-8 isoform PAX8C	-	113973573	114036498	59.2395	8.15708	5.48833	2.53512
ASHGA5P020282	7.74474	7.74474	2.95322	up	noncoding	ENST00000510859	AC016683.6	GENCODE	2313	chr2	+	114008342	114024550		GGGGAGACCCACACATATACTCACAGAAATGAGTTATTTAAAGAAGACGGTCCAGATTCC		intronic antisense	NM_013953	PAX8	paired box protein Pax-8 isoform PAX8D	-	113973573	114036498	59.2395	8.15708	5.48833	2.53512
ASHGA5P020282	7.74474	7.74474	2.95322	up	noncoding	ENST00000510859	AC016683.6	GENCODE	2313	chr2	+	114008342	114024550		GGGGAGACCCACACATATACTCACAGAAATGAGTTATTTAAAGAAGACGGTCCAGATTCC		intronic antisense	NM_013992	PAX8	paired box protein Pax-8 isoform PAX8E	-	113973573	114036498	59.2395	8.15708	5.48833	2.53512
ASHGA5P022162	4.23964	4.23964	2.08394	up	noncoding	ENST00000550905	RP11-438N16.1	GENCODE	589	chr12	-	114117263	114211486		TCGACACATGAAACAAGGTCTCACTCTATCACCCACCTGGAGTATAGTAGCACGATCATG		intergenic							1592.52	200.503	9.43354	7.3496
ASHGA5P035739	2.29827	2.29827	1.20055	up	noncoding	ENST00000432822	AC019055.1	GENCODE	443	chr2	+	19911475	19917337		AACATATCTCAAGGAGCTCATGAAGTCATCCTCATGCACACAGTTTCCCAGGTGTCAGAT		intergenic							57.8953	27.9931	5.45728	4.25673
ASHGA5P037057	2.52811	2.52811	1.33806	up	noncoding	ENST00000423733	RP3-511B24.5	GENCODE	498	chr20	+	39809095	39825427		CATTCAAAGAGGTCAGATTTGTGGGCAGGCAAGAGCTCAGGAATGAAGAACCAAAAAGGA		natural antisense	NM_015035	ZHX3	zinc fingers and homeoboxes protein 3	-	39807088	39928739	14.9049	5	3.65931	2.32125
ASHGA5P049536	165.077	165.077	7.367	up	noncoding	TCONS_00022727	XLOC_011006	LincRNAs identified by Cabili et al	826	chr14	-	44862208	44914002		AACAACTGTACCCTTACAACCACCACTGTAATCAAGAGGTATAACAGCTTCATCAGTTCA		intergenic							9069.26	34.0055	11.9131	4.54608
ASHGA5P034495	5.26827	5.26827	2.39733	up	noncoding	uc001amm.3	C1orf211	UCSC_knowngene	1260	chr1	+	6297870	6299502		CACTGTGCACCCAGCCCTCCATGCTTGGGGACAACACACCTACAAAAATATAAGAAAAAA		intergenic							16549.6	1523.03	12.9553	10.558
ASHGA5P047707	281.942	281.942	8.13926	up	noncoding	uc001lab.2	LOC143188	UCSC_knowngene	3206	chr10	+	114610672	114615127		TTCCCGCCAGTCCAGAGAGGGTTCCTAATTGGCTTTCCATTAAAGAGAAAATAGACTACT	143188	intergenic							5401.05	11.7259	11.1331	2.99385
ASHGA5P056737	2.64412	2.64412	1.40279	up	noncoding	TCONS_00008211	XLOC_003669	LincRNAs identified by Cabili et al	383	chr4	+	120597483	120610372		GAGGAAAAGAATAGAGGAAATGGTGCAATTCACACACCTGCAGAAACTCCAGGTGTGGTT		intergenic							15.5681	5	3.72404	2.32125
ASHGA5P017716	230.829	230.829	7.85068	up	noncoding	ENST00000445003	RP11-290F20.3	GENCODE	539	chr20	+	48884035	48894964		GCAGAGCCAGTGGAATGTCACCATCGCCCAGGTGGGGATTTTTGTGTGTTTTGTTCACTG		intergenic							2827.84	5	10.1719	2.32125
ASHGA5P043038	49.6258	49.6258	5.63302	up	noncoding	uc003tji.2	RASA4P	UCSC_knowngene	2912	chr7	-	44068485	44078575		AGTCATATCCTGATGATATCCATGCTCCTCAGTCACGCATCCCGTGGTGCAGGGGCTGAC	401331	intergenic							6015.5	69.3368	11.2876	5.65459
ASHGA5P039283	7.01554	7.01554	2.81055	up	noncoding	ENST00000468356	RP11-1191J2.2	GENCODE	1388	chr4	-	647011	649434		CGGCTGGGACTCTCCCATCAGCACAGACCACACGTCAAAAAATTCCTGGGCAGAGAAGAG		natural antisense	NM_000283	PDE6B	rod cGMP-specific 3',5'-cyclic phosphodiesterase subunit beta isoform 1	+	619362	664681	1768.27	138.246	9.56962	6.75907
ASHGA5P039283	7.01554	7.01554	2.81055	up	noncoding	ENST00000468356	RP11-1191J2.2	GENCODE	1388	chr4	-	647011	649434		CGGCTGGGACTCTCCCATCAGCACAGACCACACGTCAAAAAATTCCTGGGCAGAGAAGAG		natural antisense	NM_001145291	PDE6B	rod cGMP-specific 3',5'-cyclic phosphodiesterase subunit beta isoform 2	+	619362	664681	1768.27	138.246	9.56962	6.75907
ASHGA5P039283	7.01554	7.01554	2.81055	up	noncoding	ENST00000468356	RP11-1191J2.2	GENCODE	1388	chr4	-	647011	649434		CGGCTGGGACTCTCCCATCAGCACAGACCACACGTCAAAAAATTCCTGGGCAGAGAAGAG		natural antisense	NM_001145292	PDE6B	rod cGMP-specific 3',5'-cyclic phosphodiesterase subunit beta isoform 3	+	646965	664681	1768.27	138.246	9.56962	6.75907
ASHGA5P030804	2.53032	2.53032	1.33932	up	noncoding	ENST00000558427	RP11-66B24.2	GENCODE	548	chr15	+	101390468	101400221		ATGTCCATCCGACCGTGACCTCAGCACTCATTGATAAAAGGAGAGTAGGACCATTCCCAG		intergenic							58.7815	25.8466	5.47954	4.14022
ASHGA5P027857	7.3983	7.3983	2.88719	up	noncoding	ENST00000437400	RP11-293A10.3	GENCODE	444	chr1	-	109276877	109278894		GCCCACTCATATTGCCAAGCCTAGCTTGTGATTTATAAATTTATTTTTTCTGATCCTCTA		intronic antisense	NM_001144937	FNDC7	fibronectin type III domain-containing protein 7 precursor	+	109255555	109285367	47.4951	5	5.20845	2.32125
ASHGA5P017465	19.1909	19.1909	4.26235	up	noncoding	uc003pgp.1	BC031876	UCSC_knowngene	1056	chr6	+	73972949	73986225		AATTACATCTGCAAAGACCTTATTTCCAGGCTCAAGCAGAGTCTTCCTCCTGGTGTTCCA		intronic antisense	NM_001251874	KHDC1	KH homology domain-containing protein 1 isoform 1	-	73951037	74019938	448.441	18.5055	7.90478	3.64243
ASHGA5P045298	20.3724	20.3724	4.34854	up	noncoding	uc004ami.1	AK097447	UCSC_knowngene	2208	chr9	-	84545140	84592004		AGACACCTTTGCAGAAGAAAAAACAACTTCCTCTCTTCCTCTACTTCACTCTGGCAAGTT		natural antisense	NM_001145197	FAM75D4	putative protein FAM75D4	+	84543342	84549913	40658	1195.57	14.5386	10.1901
ASHGA5P045298	20.3724	20.3724	4.34854	up	noncoding	uc004ami.1	AK097447	UCSC_knowngene	2208	chr9	-	84545140	84592004		AGACACCTTTGCAGAAGAAAAAACAACTTCCTCTCTTCCTCTACTTCACTCTGGCAAGTT		natural antisense	NM_207416	FAM75D3	putative protein FAM75D3	+	84558414	84565009	40658	1195.57	14.5386	10.1901
ASHGA5P030342	18.3657	18.3657	4.19894	up	noncoding	NR_040094	LOC348120	RefSeq	3417	chr15	+	21145766	21198633		ATAATATCCTCCTATCTCTGAAAGAACAAGTTCCATCTCCATTTTCCAGGAGAGTTTTTT	348120	intergenic							6161.42	173.697	11.3206	7.12167
ASHGA5P026910	2.34069	2.34069	1.22694	up	noncoding	ENST00000525706	RP11-1007G5.2	GENCODE	1387	chr11	+	128396036	128400284		TGGCTCCCATACAATAAAAATCTTTCTTCCGTTGAGTTGGTGAAAAGAAGAGAAGCAAAA		intronic antisense	NM_001143820	ETS1	protein C-ets-1 isoform 1	-	128328655	128457453	32.6537	16.8342	4.72883	3.50189
ASHGA5P035296	38.4436	38.4436	5.26467	up	noncoding	NR_036537	LOC100131320	RefSeq	2474	chr2	-	130724164	130738045		TCTCAGTCTTTCTCTCTTTTCTCTGGTGATTAAAAAGTTGGTTTTTGGTAAGGAAAAGGA	100131320	natural antisense	NM_032144	RAB6C	ras-related protein Rab-6C	+	130737234	130740311	13820	201.713	12.6252	7.36058
ASHGA5P047379	2.4325	2.4325	1.28244	up	noncoding	ENST00000418426	RP11-402L1.11	GENCODE	462	chr10	+	44161115	44162453		GTTTGTCTTCTTGGGGTAACTTGTTCATTCATATATGAATTGTCACCCATTCTATCAAAC		intergenic							23.2989	11.6821	4.27092	2.98848
ASHGA5P042926	11.4153	11.4153	3.5129	up	noncoding	ENST00000418764	AC004543.2	GENCODE	369	chr7	-	19853307	19857713		AGAATATTTGGCTTATCTTCAACATCTTCATACCATCAGATAACTCCAAAGTTAACACAG		intergenic							78.4334	5	5.83415	2.32125
ASHGA5P026699	5.19167	5.19167	2.3762	up	noncoding	TCONS_00012032	XLOC_005563	LincRNAs identified by Cabili et al	7390	chr6	+	170484892	170494926		AGCCCTCAATCATCTTAGGTCACCCACTGAATTTCTAGGCAAGGACCTGTTTTCTTTCCA		intergenic							1638.45	170.307	9.46674	7.09054
ASHGA5P000468	3.59885	3.59885	1.84754	up	noncoding	chr5:72743475-72759550+	chr5:72743475-72759550	LincRNAs identified by Khalil et al	16075	chr5	+	72707719	72723794		TCTGGTCTCTTTACCATCATTTCAAACTCTTCATCTTTGGGAGGCCTCCACAGTGTCATA		intergenic							24.4349	7.44171	4.3314	2.48387
ASHGA5P045345	2.86	2.86	1.51601	up	noncoding	ENST00000442726	RP11-177F15.1	GENCODE	2900	chr1	+	238648744	238701605		CCCCAGAATAGAAAATGCTTATTCTCTTGGAGAGAGAAATAAATTTAATCTTTACACGGG		intergenic							17.3312	5.68206	3.87484	2.35883
ASHGA5P042807	394.376	394.376	8.62343	up	noncoding	NR_037605	GAS5-AS1	RefSeq	702	chr1	+	173832385	173833079	ENST00000416578	GATGAAAAGCACTGTCCTTTTTTAAGTAAACACTACACACTCCAGATGGATTGCAAAAAT	100506046	intergenic							7379.12	11.4454	11.5811	2.95767
ASHGA5P051529	5.68044	5.68044	2.506	up	noncoding	ENST00000411941	AL592284.1	GENCODE	389	chr1	-	144506276	144521002	ENST00000426301, ENST00000430014, ENST00000440084, ENST00000440719, ENST00000455295, NM_001178056, NM_024615, NR_024510, NR_024511, NR_027468, NR_046135, NR_046136, NR_046137, NR_046138, NR_046139, uc001ejr.4, uc001ekv.2, uc001eky.4, uc001ela.4, uc001eql.2, uc001eqo.1, uc001esl.4, uc009why.2, uc009wjy.1, uc009wjz.1	CCGAAACCAGTTGGCCTTCAGCCCCTGCCTCGGCCAGAGGTTTCATTTTTAACTGAATAT		natural antisense	ENST00000538264	AL592284.2	Uncharacterized protein [Source:UniProtKB/TrEMBL;Acc:F5H305]	+	144339737	144521058	181.534	29.2151	6.82802	4.32202
ASHGA5P032356	163.369	163.369	7.35199	up	noncoding	uc010cul.1	AX747639	UCSC_knowngene	1604	chr17	-	34575459	34577063	uc002how.1	TCATATCCACACAATGGTAATTATTGAAATGAGAGACTCAAAAGAAGATGGAACGTGAAC		intergenic							40669.8	180.355	14.539	7.187
ASHGA5P043935	9.53898	9.53898	3.25384	up	noncoding	ENST00000447529	AC078842.4	GENCODE	1835	chr7	+	137003338	137011700		TCCACCAGAACTCACACTTTCTTCCTTATATTTTTCCATCTTTAAACACAAGTTAGGAGA		intronic antisense	NM_002825	PTN	pleiotrophin precursor	-	136912091	137028546	310.933	27.2114	7.46827	4.21444
ASHGA5P025691	115.133	115.133	6.84715	up	noncoding	NR_026986	LOC339524	RefSeq	3229	chr1	+	87597608	87602352		AGGGTGTGGGCACCAGATACTGCTACACCATCTCATCGGCATGGACCTATATGTGGCAGC	339524	exon sense-overlapping	ENST00000356813	HS2ST1	heparan sulfate 2-O-sulfotransferase 1 [Source:HGNC Symbol;Acc:5193]	+	87458764	87602334	5171.13	27.4375	11.0738	4.22663
ASHGA5P025691	115.133	115.133	6.84715	up	noncoding	NR_026986	LOC339524	RefSeq	3229	chr1	+	87597608	87602352		AGGGTGTGGGCACCAGATACTGCTACACCATCTCATCGGCATGGACCTATATGTGGCAGC	339524	exon sense-overlapping	ENST00000370548	HS2ST1	heparan sulfate 2-O-sulfotransferase 1 [Source:HGNC Symbol;Acc:5193]	+	87458691	87634887	5171.13	27.4375	11.0738	4.22663
ASHGA5P029560	5.92984	5.92984	2.56799	up	noncoding	ENST00000554458	RP11-813I20.2	GENCODE	459	chr14	+	56214925	56239921		CTCCCAGTTCCTCCTTTTCTCAATTAAGCTATAATTAGCAGAATAGTTGTTCTTAGATAC		intergenic							11021.3	842.332	12.2252	9.65722
ASHGA5P035830	3.24306	3.24306	1.69736	up	noncoding	ENST00000418836	AC104654.1	GENCODE	534	chr2	+	42104213	42105095		CCCGCTGAATCTCGTCCTTTGCTTCATCCATTCCATTAAATAAGTCATATTGAAAATAAA		intergenic							30460	4944.16	14.0364	12.339
ASHGA5P058192	9.72078	9.72078	3.28107	up	noncoding	TCONS_00027943	XLOC_013552	LincRNAs identified by Cabili et al	3998	chr20	+	47101407	47105804	TCONS_00028202, TCONS_00028203, TCONS_00028204, TCONS_00028561	AGACTAGCACCATTTCCTTTCTGGGTCTCCAGCTCCATGACCCTCAGACTTGAACAGCAG		intergenic							2381.43	131.431	9.96194	6.68086
ASHGA5P026715	4.76206	4.76206	2.25159	up	noncoding	AA938966		LincRNAs identified by Khalil et al	408	chr6	+	112303900	112304307		AAGAAAGAAATTGAAACCAGGTAAGCTCTTCCTTGTGCATTCTTCCCTCCCTCACAGGTG		intergenic							4497.49	446.763	10.8795	8.62794
ASHGA5P023715	183.38	183.38	7.51869	up	noncoding	HMlincRNA1593-	HMlincRNA1593	LincRNAs identified by Khalil et al	4217	chrX	-	39487152	39491369		AAATTAGAAGGGAGGTGAAGCATCTGCACATGATAAAAAGATTCACACCCACATGGAAAT		intergenic							3407.28	11.3065	10.4619	2.94326
ASHGA5P037905	20.0575	20.0575	4.32607	up	noncoding	ENST00000451486	CTA-292E10.6	GENCODE	347	chr22	+	29197879	29218203		TAAAGCAAATTACAAAATGTGAAATTCCCCAGAAATGCACAGCAATACCTTCTCTAACAA		intergenic							155.376	5	6.64732	2.32125
ASHGA5P051452	2.38382	2.38382	1.25327	up	noncoding	ENST00000439246	AC093415.2	GENCODE	3139	chr3	-	37847319	37862591	uc003che.3	GTCTTTTCAGATGCCAAACACTGAGCAGGCTTTGTTCTCCACCCACAAACCAGAGGCTGT		intronic antisense	NM_002207	ITGA9	integrin alpha-9 precursor	+	37493812	37861281	205.468	72.6142	6.97908	5.72581
ASHGA5P032691	2.96831	2.96831	1.56964	up	noncoding	ENST00000571591	CTD-2561B21.3	GENCODE	549	chr17	-	78934565	78935513		AAATAATGTTTTTACAGCAGAACGGCTGCTAAATATCGGCGCTCCTCACCTCACACTCAC		natural antisense	NM_001163034	RPTOR	regulatory-associated protein of mTOR isoform 2	+	78518624	78940173	61.0528	23.0123	5.53479	3.96514
ASHGA5P032691	2.96831	2.96831	1.56964	up	noncoding	ENST00000571591	CTD-2561B21.3	GENCODE	549	chr17	-	78934565	78935513		AAATAATGTTTTTACAGCAGAACGGCTGCTAAATATCGGCGCTCCTCACCTCACACTCAC		natural antisense	NM_020761	RPTOR	regulatory-associated protein of mTOR isoform 1	+	78518624	78940173	61.0528	23.0123	5.53479	3.96514
ASHGA5P042511	14.7882	14.7882	3.88638	up	noncoding	ENST00000455554	RP11-35J1.1	GENCODE	569	chr6	+	77232167	77303340		GGTAATGTAACTTTCAGTTTCTTCTCATTTCAGTTAAAACTTGCTTTCACCATCAGGGTT		intergenic							167.526	10.5763	6.73651	2.85013
ASHGA5P036560	3.31444	3.31444	1.72876	up	noncoding	TCONS_00025508	XLOC_012318	LincRNAs identified by Cabili et al	366	chr17	+	75663171	75663808		AACTCATTCTTTGTTTCTCTCATACATCAACTAACTCACAACTTGCCTTACTCACTGTGA		intergenic							19.6717	5	4.05002	2.32125
ASHGA5P023727	18.3623	18.3623	4.19867	up	noncoding	HMlincRNA1613-	HMlincRNA1613	LincRNAs identified by Khalil et al	9863	chrX	-	118619272	118629135		AGGACAGGGAGTGGCCCTCTTACTCCTCCCTTTTTCTTTCTTCCTTAGGTTCTTTTATAT		intergenic							23278.3	689.092	13.5299	9.33118
ASHGA5P028343	2.02767	2.02767	1.01983	up	noncoding	ENST00000453128	RP11-159M11.2	GENCODE	705	chr1	-	116556433	116560326		CCCCTTACTAATGTATGCTTTACTTCTGAATTCCATTCTTCACATGCAATTCTTAACAAG		intronic antisense	NM_018420	SLC22A15	solute carrier family 22 member 15	+	116519118	116612675	180.79	76.56	6.8245	5.80467
ASHGA5P000329	24.2321	24.2321	4.59885	up	noncoding	chr2:129171850-129204875-	chr2:129171850-129204875	LincRNAs identified by Khalil et al	33025	chr2	-	129455380	129488405		ATTCTGTCACTGAAATGCTGGGACGTTCCATTTCAGTGGGACAAACATCACCCCATCAAA		intergenic							635.05	19.887	8.34657	3.74772
ASHGA5P058685	2.09904	2.09904	1.06973	up	noncoding	uc.352-	uc.352	UCR	200	chr13	-	72694164	72694364		GGGGCGTGGGTGCAAATCTATTTTAGACTTGGCCTTTAAAATGTTTTTTAAATTGAATGA		intergenic							17.0862	10.0825	3.85432	2.78459
ASHGA5P048328	5.16482	5.16482	2.36872	up	noncoding	ENST00000532553	CTD-2530H12.8	GENCODE	546	chr11	-	75307188	75308315		TATATCTGTATATTCCACAAGGAGGGATACTATAGAGAGGAAAGAGCTCCTCCATTAAGG		intron sense-overlapping	NM_033063	MAP6	microtubule-associated protein 6 isoform 1	-	75297962	75379479	31.7006	5	4.68997	2.32125
ASHGA5P016478	2.16401	2.16401	1.1137	up	noncoding	ENST00000430772	FTX	GENCODE	708	chrX	-	73467698	73513362		GAACAGGTATCTCAGATTCCCAGTTCTCAATCTTCCTTCCTCCTTACAAGATACAAGCAA	100302692	intergenic							27381	6320.91	13.8318	12.718
ASHGA5P052237	5.22321	5.22321	2.38494	up	noncoding	ENST00000515466	RP11-159F24.1	GENCODE	557	chr5	-	43575879	43603278	ENST00000506247	TCCCCGCCCCAGCTTTCTTCCCGCCAGGCCCCCTCCACCCGATCGCCGCGCGCTCTCCGA		natural antisense	NM_012343	NNT	NAD(P) transhydrogenase, mitochondrial	+	43602790	43705668	18202.7	1685.68	13.0991	10.7142
ASHGA5P052237	5.22321	5.22321	2.38494	up	noncoding	ENST00000515466	RP11-159F24.1	GENCODE	557	chr5	-	43575879	43603278	ENST00000506247	TCCCCGCCCCAGCTTTCTTCCCGCCAGGCCCCCTCCACCCGATCGCCGCGCGCTCTCCGA		natural antisense	NM_182977	NNT	NAD(P) transhydrogenase, mitochondrial	+	43603228	43705668	18202.7	1685.68	13.0991	10.7142
ASHGA5P027984	17.0321	17.0321	4.09018	up	noncoding	ENST00000551284	RP3-405J10.4	GENCODE	325	chr12	+	50613386	50623767		ATCTTATGTCTCTTCCATCTTCTTGTTTTTAAGGGACAGGGATCTTACTGTGTTGCCCAG		intronic antisense	NM_001113546	LIMA1	LIM domain and actin-binding protein 1 isoform 1	-	50569562	50677353	1309.08	48.2775	9.18538	5.0952
ASHGA5P027984	17.0321	17.0321	4.09018	up	noncoding	ENST00000551284	RP3-405J10.4	GENCODE	325	chr12	+	50613386	50623767		ATCTTATGTCTCTTCCATCTTCTTGTTTTTAAGGGACAGGGATCTTACTGTGTTGCCCAG		intronic antisense	NM_001113547	LIMA1	LIM domain and actin-binding protein 1 isoform 3	-	50569562	50616488	1309.08	48.2775	9.18538	5.0952
ASHGA5P027984	17.0321	17.0321	4.09018	up	noncoding	ENST00000551284	RP3-405J10.4	GENCODE	325	chr12	+	50613386	50623767		ATCTTATGTCTCTTCCATCTTCTTGTTTTTAAGGGACAGGGATCTTACTGTGTTGCCCAG		intronic antisense	NM_016357	LIMA1	LIM domain and actin-binding protein 1 isoform 2	-	50569562	50677353	1309.08	48.2775	9.18538	5.0952
ASHGA5P015680	226.274	226.274	7.82193	up	noncoding	ENST00000422506	GUSBP11	GENCODE	2055	chr22	-	23980673	24059543	uc002zxl.4	TGCCCATGGACCGACACACCACTCTTCCTGTTGGCCCAAGGACCTGCTGAAGCTCACACC	91316	intronic antisense	NM_153615	RGL4	ral-GDS-related protein precursor	+	24033047	24041363	57117.9	209.848	15.2507	7.42877
ASHGA5P029067	2.08817	2.08817	1.06224	up	noncoding	EB386294		LincRNAs identified by Khalil et al	795	chr10	-	20678507	20679302		CCTGGAATTCCATTTCTTTTCCATGCCACGTAACTGCATCCTGATGCCCTGATGATTTTG		intergenic							872.462	242.343	8.71241	7.65017
ASHGA5P057935	11.9656	11.9656	3.58082	up	noncoding	TCONS_00023984	XLOC_011316	LincRNAs identified by Cabili et al	216	chr15	+	77991685	77992117		GCACACAATAAGCACATACTAACCATCATCCCCACACACAGTAAGTGCATACTAACCATC		intronic antisense	ENST00000561686	LINGO1	leucine rich repeat and Ig domain containing 1 [Source:HGNC Symbol;Acc:21205]	-	77907694	78079356	91937.8	5540.15	16.0963	12.5154
ASHGA5P057935	11.9656	11.9656	3.58082	up	noncoding	TCONS_00023984	XLOC_011316	LincRNAs identified by Cabili et al	216	chr15	+	77991685	77992117		GCACACAATAAGCACATACTAACCATCATCCCCACACACAGTAAGTGCATACTAACCATC		intronic antisense	ENST00000562933	LINGO1	leucine rich repeat and Ig domain containing 1 [Source:HGNC Symbol;Acc:21205]	-	77908195	78112674	91937.8	5540.15	16.0963	12.5154
ASHGA5P057935	11.9656	11.9656	3.58082	up	noncoding	TCONS_00023984	XLOC_011316	LincRNAs identified by Cabili et al	216	chr15	+	77991685	77992117		GCACACAATAAGCACATACTAACCATCATCCCCACACACAGTAAGTGCATACTAACCATC		intronic antisense	ENST00000563316	LINGO1	leucine rich repeat and Ig domain containing 1 [Source:HGNC Symbol;Acc:21205]	-	77908218	78113213	91937.8	5540.15	16.0963	12.5154
ASHGA5P057935	11.9656	11.9656	3.58082	up	noncoding	TCONS_00023984	XLOC_011316	LincRNAs identified by Cabili et al	216	chr15	+	77991685	77992117		GCACACAATAAGCACATACTAACCATCATCCCCACACACAGTAAGTGCATACTAACCATC		intronic antisense	ENST00000564472	LINGO1	leucine rich repeat and Ig domain containing 1 [Source:HGNC Symbol;Acc:21205]	-	77908123	78013093	91937.8	5540.15	16.0963	12.5154
ASHGA5P057935	11.9656	11.9656	3.58082	up	noncoding	TCONS_00023984	XLOC_011316	LincRNAs identified by Cabili et al	216	chr15	+	77991685	77992117		GCACACAATAAGCACATACTAACCATCATCCCCACACACAGTAAGTGCATACTAACCATC		intronic antisense	ENST00000566711	LINGO1	leucine rich repeat and Ig domain containing 1 [Source:HGNC Symbol;Acc:21205]	-	77908014	78111794	91937.8	5540.15	16.0963	12.5154
ASHGA5P057935	11.9656	11.9656	3.58082	up	noncoding	TCONS_00023984	XLOC_011316	LincRNAs identified by Cabili et al	216	chr15	+	77991685	77992117		GCACACAATAAGCACATACTAACCATCATCCCCACACACAGTAAGTGCATACTAACCATC		intronic antisense	ENST00000567726	LINGO1	leucine rich repeat and Ig domain containing 1 [Source:HGNC Symbol;Acc:21205]	-	77907854	77999849	91937.8	5540.15	16.0963	12.5154
ASHGA5P057935	11.9656	11.9656	3.58082	up	noncoding	TCONS_00023984	XLOC_011316	LincRNAs identified by Cabili et al	216	chr15	+	77991685	77992117		GCACACAATAAGCACATACTAACCATCATCCCCACACACAGTAAGTGCATACTAACCATC		intronic antisense	ENST00000570216	LINGO1	leucine rich repeat and Ig domain containing 1 [Source:HGNC Symbol;Acc:21205]	-	77908174	78113242	91937.8	5540.15	16.0963	12.5154
ASHGA5P029949	15.2822	15.2822	3.93378	up	noncoding	ENST00000563217	RP11-532F12.5	GENCODE	250	chr15	-	41130748	41132691		TGAAGAGAGAGACACACCGTGATGACCTCCACATACCATATTTGATGACAGTCTTCCTTG		intergenic							21169.8	730.999	13.3647	9.43097
ASHGA5P041138	3.4366	3.4366	1.78098	up	noncoding	ENST00000508065	GTF2H2B	pseudogene	1432	chr5	+	69711178	69743353	NM_001042490, NM_001098728, NM_001515, NR_033417	ATAAGATTCCAGCTCCTTCAGGTGTTTGATTCCAGCATGTAGTATACATTGTATGTGTTA	653238								8946.43	1123.94	11.8881	10.1071
ASHGA5P041920	3.6144	3.6144	1.85376	up	noncoding	ENST00000457116	RP5-991C6.4	GENCODE	471	chr6	-	82434438	82446070		CCGTTCTATCCCATTCCCTGGACCAAATGTTTGCAATATATAACACTTCTTTAAACTTTA		intron sense-overlapping	ENST00000412306	FAM46A	family with sequence similarity 46, member A [Source:HGNC Symbol;Acc:18345]	-	82201155	82461529	33998.9	5067.79	14.2265	12.3727
ASHGA5P051730	53.3504	53.3504	5.73743	up	noncoding	uc009wkz.1	FCGR1C	UCSC_knowngene	566	chr1	+	149370546	149375252		TTTTCTTTTTCTTCTTGTAATCTCCAAGTAGACACCACAAAGGCAGTGATCACTTTGCAG	100132417	intergenic							582.854	7.69162	8.23997	2.50255
ASHGA5P040488	4.58934	4.58934	2.19829	up	noncoding	uc003jyk.3	LOC100170939	UCSC_knowngene	286	chr5	-	69422504	69423523	NR_024054, uc010ixj.1	TTAAAGGAATAATTCTCCTCCGACTCTGCCGTTCCATCCAGTGAAACTCTTCATTCTGGG		intergenic							5235.11	524.11	11.0881	8.88979
ASHGA5P051463	3.79021	3.79021	1.92228	up	noncoding	ENST00000537401	RP11-439A17.9	GENCODE	2034	chr1	+	120924840	120926874		ACAGTCCCTTAGGAGTCATTTGTAAGTACTATTTCCTTCCTTATTGTCTATACTATTCCC		natural antisense	NM_001004340	FCGR1B	high affinity immunoglobulin gamma Fc receptor IB isoform 2 precursor	-	120926127	120935944	82.5718	23.1594	5.89487	3.9726
ASHGA5P051463	3.79021	3.79021	1.92228	up	noncoding	ENST00000537401	RP11-439A17.9	GENCODE	2034	chr1	+	120924840	120926874		ACAGTCCCTTAGGAGTCATTTGTAAGTACTATTTCCTTCCTTATTGTCTATACTATTCCC		natural antisense	NM_001017986	FCGR1B	high affinity immunoglobulin gamma Fc receptor IB isoform 1 precursor	-	120926127	120935944	82.5718	23.1594	5.89487	3.9726
ASHGA5P028451	3.30381	3.30381	1.72413	up	noncoding	NR_029383	PAN3-AS1	RefSeq	2211	chr13	-	28710979	28713311		ATTTTTAAATTCTGCCTCCACTCGCTCTCTCGCGCTCTGGTTCCTCCGAGTTGTTTATTC	100288730	natural antisense	NM_175854	PAN3	PAB-dependent poly(A)-specific ribonuclease subunit 3	+	28712642	28869475	10375.3	1385.02	12.1239	10.3997
ASHGA5P019934	22.052	22.052	4.46284	up	noncoding	ENST00000505495	RP11-94C24.10	GENCODE	1001	chr17	-	48633964	48636811		TCTGCGAGAGGTAGACACGGCGGAACCTAGTGGAATCCCATCATCGCGTGCACATCTCAT		intergenic							750.303	24.7753	8.5327	4.06986
ASHGA5P038420	128.578	128.578	7.0065	up	noncoding	ENST00000425517	RP11-424D14.1	GENCODE	627	chr1	+	69521580	69650686		CTTTGAGAATGCCTATAGTTATCATTGCCATCATCTCAAAGGAGAAGAATTCTTTAACTC		intergenic							20256.4	102.783	13.2788	6.27229
ASHGA5P057013	6.8059	6.8059	2.76679	up	noncoding	TCONS_00011945	XLOC_005455	LincRNAs identified by Cabili et al	450	chr6	+	123427048	123433459		AAGGCTATCATAAGGTTCTGGTATGAAGATGGCTTCATAGCATCATCCCTCCTCCTGATG		intergenic							505.415	55.056	8.05817	5.29138
ASHGA5P019299	2.37276	2.37276	1.24656	up	noncoding	ENST00000477404	RPS27P25	GENCODE	484	chr12	+	120807242	120809491	NM_001030	ACAGATGAGGGGATCTCCTTCATCCTTCTCCAGAAGAGAAGAGGAAACAGAAGAAGAAAC		bidirectional	NM_002442	MSI1	RNA-binding protein Musashi homolog 1	-	120779132	120806983	13.8852	5	3.56782	2.32125
ASHGA5P023584	2.08642	2.08642	1.06103	up	noncoding	ENST00000584898	RP11-595B24.1	GENCODE	603	chr18	+	19561081	19631120		CCAGTAAAAGTAGCATCTCTTCCTCAAAGATGAGCCAGCCGTCATTTGAAGAGGAGGAAA		intergenic							13.7593	7.59748	3.55708	2.49605
ASHGA5P057150	215.846	215.846	7.75386	up	noncoding	TCONS_00013774	XLOC_006402	LincRNAs identified by Cabili et al	341	chr7	-	31537025	31539781		ATGCATTGATCGGTTCTCATGTGACAGGCGTCCTACTCCATTCCTGGGGAGCAGTGGTGG		intergenic							14743.3	45.3343	12.7487	4.99485
ASHGA5P043219	11.1736	11.1736	3.48202	up	noncoding	TCONS_00018397	XLOC_008679	LincRNAs identified by Cabili et al	211	chr10	+	134830881	134831148		GAGGGGTCCAACCATTTCTCATGTATGGCCACACACCACTTCCGTTCACAGAGACCCCAG		intergenic							65335.2	3938.15	15.491	12.009
ASHGA5P056584	13.2903	13.2903	3.7323	up	noncoding	TCONS_00006336	XLOC_002952	LincRNAs identified by Cabili et al	789	chr3	+	184445192	184456749		GCATTCCTTGCTACAGCCACAAGCTGTCTCCACCATCAGATGTGGCTTACCTGGTTCCTG		intergenic							1260.23	59.133	9.1351	5.4028
ASHGA5P016234	13.0841	13.0841	3.70974	up	noncoding	ENST00000428329	AC007319.1	GENCODE	248	chr2	+	188418875	188419390		ATATTGCCAGGTATTGAAGACAGGATTTATCTTCTCTACTTCTTCTTTTAGAAGCAGATC		natural antisense	NM_001032281	TFPI	tissue factor pathway inhibitor isoform b precursor	-	188343304	188419219	97.94	6.19484	6.0935	2.38376
ASHGA5P016234	13.0841	13.0841	3.70974	up	noncoding	ENST00000428329	AC007319.1	GENCODE	248	chr2	+	188418875	188419390		ATATTGCCAGGTATTGAAGACAGGATTTATCTTCTCTACTTCTTCTTTTAGAAGCAGATC		natural antisense	NM_006287	TFPI	tissue factor pathway inhibitor isoform a precursor	-	188328957	188419219	97.94	6.19484	6.0935	2.38376
ASHGA5P030417	7.04505	7.04505	2.81661	up	noncoding	uc001zfu.3	DQ786280	UCSC_knowngene	830	chr15	+	32449483	32450313		ATCCACTCCATTTCTAAAAGCAAGTTGAACAGCAAATTTCAGTTGATGGGAACCTATATT		exon sense-overlapping	NM_000746	CHRNA7	neuronal acetylcholine receptor subunit alpha-7 isoform 1 precursor	+	32322685	32462384	2285.56	172.191	9.92378	7.10717
ASHGA5P030417	7.04505	7.04505	2.81661	up	noncoding	uc001zfu.3	DQ786280	UCSC_knowngene	830	chr15	+	32449483	32450313		ATCCACTCCATTTCTAAAAGCAAGTTGAACAGCAAATTTCAGTTGATGGGAACCTATATT		exon sense-overlapping	NM_001190455	CHRNA7	neuronal acetylcholine receptor subunit alpha-7 isoform 2 precursor	+	32322685	32462384	2285.56	172.191	9.92378	7.10717
ASHGA5P020717	8.03817	8.03817	3.00687	up	noncoding	ENST00000518922	RP11-3G20.1	GENCODE	414	chr8	-	122684012	122696802		GTGGGAAAAGGAAGGCAAATATTTATTCACCCATCCATAAACTCATAAAAATTGCCAACT		intergenic							35076.5	2406.97	14.2739	11.2671
ASHGA5P022950	2.44748	2.44748	1.2913	up	noncoding	ENST00000566255	RP11-566K19.9	pseudogene	1708	chr15	-	23572031	23579274	ENST00000316397, ENST00000427390, ENST00000568624	AGGAAAAGATATACGGAAGCAGGAGGAGAAGATGTGGAGGCAGGAGGAGAAGATGCACGA									15.0291	6.1398	3.67248	2.38118
ASHGA5P000435	38.3852	38.3852	5.26248	up	noncoding	chr4:92760700-92774625-	chr4:92760700-92774625	LincRNAs identified by Khalil et al	13925	chr4	-	92541677	92555602		AGCTTAATCTACCAGTCTTTATCATCACTCTCTTCCTCATAGTAAGGTTAAGAGAGACTA		intergenic							5521.34	80.9257	11.1578	5.89533
ASHGA5P033126	2.21763	2.21763	1.14902	up	noncoding	ENST00000563852	RP11-506G7.1	GENCODE	743	chr17	+	41020507	41025481	ENST00000566825	GGTAACCCAGCGGAAGGAGGAGGAACCTAGTAGCACCAGCATCTACAATTTGAATGACCC		intergenic							12.9527	5.04558	3.47356	2.32455
ASHGA5P021709	5.25034	5.25034	2.39241	up	noncoding	ENST00000538810	RP11-84E24.3	GENCODE	519	chr17	+	70026794	70034889		GCCCTCAAAGCCTCTCTCAATTGCCTTCTCAGCTTGTATGCTTTGAAGAAGCAAGCTGCA		intergenic							1006.01	116.314	8.86449	6.47208
ASHGA5P057620	79.4372	79.4372	6.31174	up	noncoding	TCONS_00019740	XLOC_009534	LincRNAs identified by Cabili et al	549	chr11	-	103436303	103509798		TGTGTCCAAGCTGAAGAAGCAATTCATCACTCCATCAACTGGTTTTACTGAATCGAAGCA		intergenic							1755.39	14.0538	9.55722	3.24548
ASHGA5P043151	2.62571	2.62571	1.39271	up	noncoding	uc010lcy.1	PMS2L2	UCSC_knowngene	803	chr7	-	74977921	74988215	uc010las.1	TCTCGCTCGCCCTCTTTGAGAACCACGGCTTCCGACCTCCCTGGAAATGGGGGGAACATG	5380	intergenic							2116.8	395.704	9.81492	8.42222
ASHGA5P015447	2.0499	2.0499	1.03555	up	noncoding	ENST00000420285	RP11-5P4.1	GENCODE	355	chr1	-	63466167	63476596		TTTTAAACCTGCTTGCCACCGTTAATGTTCCTGCGGTGACATGAAGAGCCAAATACCAGA		intergenic							21.249	12.8141	4.1541	3.11854
ASHGA5P047727	6.60717	6.60717	2.72403	up	noncoding	ENST00000417968	RP11-354M20.3	GENCODE	373	chr10	+	119799663	119804844		TTCTGGCTCAGACCCTTTTTCCCCATTCCTTAAGAGAGAAAAAAGACATATATTTTCAAG		natural antisense	NM_014904	RAB11FIP2	rab11 family-interacting protein 2	-	119764426	119806114	1521.95	130.004	9.38372	6.65969
ASHGA5P031935	17.2887	17.2887	4.11175	up	noncoding	ENST00000563230	RP11-556H2.3	GENCODE	433	chr16	+	79123946	79135651		GGAATTACCTGGGATCATTTCTCATCCTCTCTCTCTTTCTCTGTATTACTTAGCCTTAAA		intron sense-overlapping	NM_016373	WWOX	WW domain-containing oxidoreductase isoform 1	+	78133326	79246564	24939.3	782.715	13.6524	9.54069
ASHGA5P034866	2.78262	2.78262	1.47645	up	noncoding	ENST00000416534	AC007463.2	GENCODE	734	chr2	-	8026900	8039786		CCTGAGATATGACTCAGCCCAGAATAAATATTTGTGCTTCATCGAAGGGTTTTACCATTA		intergenic							20.1211	8.80973	4.07764	2.60119
ASHGA5P016689	481.336	481.336	8.9109	up	noncoding	NR_051993	DIAPH3-AS1	RefSeq	337	chr13	+	60587439	60618490		GCCACCCACAATGAATTACCTCACAGGATTGCTGGTCAAAGACACTCGGAGAGACTCCAG	100874195	natural antisense	NM_001042517	DIAPH3	protein diaphanous homolog 3 isoform a	-	60239722	60738119	86258.6	164.966	15.9477	7.0368
ASHGA5P016689	481.336	481.336	8.9109	up	noncoding	NR_051993	DIAPH3-AS1	RefSeq	337	chr13	+	60587439	60618490		GCCACCCACAATGAATTACCTCACAGGATTGCTGGTCAAAGACACTCGGAGAGACTCCAG	100874195	natural antisense	NM_001258366	DIAPH3	protein diaphanous homolog 3 isoform c	-	60239720	60738119	86258.6	164.966	15.9477	7.0368
ASHGA5P016689	481.336	481.336	8.9109	up	noncoding	NR_051993	DIAPH3-AS1	RefSeq	337	chr13	+	60587439	60618490		GCCACCCACAATGAATTACCTCACAGGATTGCTGGTCAAAGACACTCGGAGAGACTCCAG	100874195	natural antisense	NM_001258367	DIAPH3	protein diaphanous homolog 3 isoform d	-	60239720	60738119	86258.6	164.966	15.9477	7.0368
ASHGA5P016689	481.336	481.336	8.9109	up	noncoding	NR_051993	DIAPH3-AS1	RefSeq	337	chr13	+	60587439	60618490		GCCACCCACAATGAATTACCTCACAGGATTGCTGGTCAAAGACACTCGGAGAGACTCCAG	100874195	natural antisense	NM_001258368	DIAPH3	protein diaphanous homolog 3 isoform e	-	60239720	60738119	86258.6	164.966	15.9477	7.0368
ASHGA5P016689	481.336	481.336	8.9109	up	noncoding	NR_051993	DIAPH3-AS1	RefSeq	337	chr13	+	60587439	60618490		GCCACCCACAATGAATTACCTCACAGGATTGCTGGTCAAAGACACTCGGAGAGACTCCAG	100874195	natural antisense	NM_001258369	DIAPH3	protein diaphanous homolog 3 isoform f	-	60348296	60738119	86258.6	164.966	15.9477	7.0368
ASHGA5P014628	44.7213	44.7213	5.48289	up	noncoding	ENST00000429621	LINC00114	GENCODE	827	chr21	-	40110944	40119384	ENST00000411989, ENST00000442549, ENST00000448579, NR_027065, NR_027066, uc011aen.1	GCTGTTGATGGTGTGGAATTAGAGGCCTGATGGAGTGGAGAGCTTTCCTCCTCATCACCT	400866	intergenic							411.193	5	7.80414	2.32125
ASHGA5P008013	3.23654	3.23654	1.69445	up	noncoding	ENST00000581291	TBC1D3P2	GENCODE	2088	chr17	-	60342065	60352988	ENST00000339120, ENST00000577902	ACAACAACATCGATCACTTTGGGATGCAGCATGAGACGGAGCTGCCTCCTCTGACTGCGC	440452	intergenic							42.5067	15.3587	5.0656	3.37115
ASHGA5P027371	3.23645	3.23645	1.69441	up	noncoding	DA096519		LincRNAs identified by Khalil et al	553	chr9	-	84189582	84190134		ATTTCTTCTGATGTTGTGTGTAGTGACCCATATCCTTCTGCATAAAAGACAGTCGAGAAA		intergenic							30.0826	11.2068	4.62459	2.93017
ASHGA5P040930	2.03361	2.03361	1.02404	up	noncoding	TCONS_00021972	XLOC_010573	LincRNAs identified by Cabili et al	700	chr13	-	39141143	39141923	TCONS_00021971	CTTTGGGCCTATCATTATCATCACTATGATTATCATGTACAGTTTGCTTGAATTTACCAC		intergenic							21004.3	4891.23	13.3437	12.3197
ASHGA5P047618	92.1272	92.1272	6.52556	up	noncoding	ENST00000422848	RP11-452K12.7	GENCODE	548	chr10	+	99160871	99179281	TCONS_00018787	CCGCTCACTCTAAATCTGGGCCTTCAATGAATGTTCAGTGGAGTTCTTCTGTGGAAAAAA		natural antisense	NM_001145114	RRP12	RRP12-like protein isoform 2	-	99116457	99161127	1113.01	7.1244	8.98355	2.458
ASHGA5P047618	92.1272	92.1272	6.52556	up	noncoding	ENST00000422848	RP11-452K12.7	GENCODE	548	chr10	+	99160871	99179281	TCONS_00018787	CCGCTCACTCTAAATCTGGGCCTTCAATGAATGTTCAGTGGAGTTCTTCTGTGGAAAAAA		natural antisense	NM_015179	RRP12	RRP12-like protein isoform 1	-	99116457	99161127	1113.01	7.1244	8.98355	2.458
ASHGA5P048221	510.588	510.588	8.99602	up	noncoding	ENST00000531086	RP11-755F10.1	GENCODE	397	chr11	-	66012310	66013710		AGACACCTTCATGCCTGTTTCCATGATTGAGAACATGGGAGTACGCTTCTTTCCACCTAC		intergenic							6139.47	5	11.3173	2.32125
ASHGA5P045966	5.60075	5.60075	2.48562	up	noncoding	NR_027406	LOC100129034	RefSeq	5714	chr9	+	127115751	127121463		TGCTATGTAAGATTATGAGTGATCCTCCCTCTATTTTGCAAACAGTCTGTAAGTAACTGA	100129034	natural antisense	NM_002799	PSMB7	proteasome subunit beta type-7 proprotein	-	127115743	127177752	379.189	52.8924	7.71188	5.22626
ASHGA5P039516	2.77507	2.77507	1.47252	up	noncoding	ENST00000514427	EMCN-IT2	GENCODE	562	chr4	-	101699738	101712392		AGTAACGTGAGGACTAAAACAGAGCAAATGTCACCTTGTCCCTGCATCAGCTCCAGAAAG		intergenic							323.144	89.6114	7.52385	6.05132
ASHGA5P048855	2.12661	2.12661	1.08855	up	noncoding	uc002bkb.3	LOC388152	UCSC_knowngene	2557	chr15	-	84868063	84898920	ENST00000335068, ENST00000400817, uc002bkc.3, uc002blo.2	GCCCCGCCCCAGCGCAGTGCCGGCCACACCCATGCACTGAAGCTCCTCCCTGCCACACCC	388152	intergenic							1189.64	296.44	9.06589	7.97733
ASHGA5P015159	5.10957	5.10957	2.3532	up	noncoding	ENST00000417384	RP11-30O15.1	GENCODE	589	chr3	+	187514042	187522925		GAGAACAAAGGCATCCATCCCAAAGATTTCCCAAAGATGTCCTCAGTAACCAAAGTGATT		intergenic							30413.4	3183.63	14.0342	11.681
ASHGA5P000528	28.2857	28.2857	4.822	up	noncoding	chr8:58900375-58914400+	chr8:58900375-58914400	LincRNAs identified by Khalil et al	14025	chr8	+	58737821	58751846		AACTTTTTAGACTTGACTCTGGACTGCAGTTTCCAGTTTCCACCATCAATCTTTACATAC		intergenic							2048.73	44.0391	9.77407	4.95207
ASHGA5P015714	87.5754	87.5754	6.45245	up	noncoding	ENST00000422858	RP11-46A10.2	GENCODE	444	chr1	+	180876936	180878078		AGTGAAGCAGACTGACCGGGCCTCAACATCACCTGGGAATCCTGGAAGGAAACAGGTTCC		intergenic							1657.19	12.0583	9.48724	3.03479
ASHGA5P027433	2.79689	2.79689	1.48382	up	noncoding	ENST00000552780	RP11-2H8.2	GENCODE	1431	chr12	-	72187634	72193407		GTTCCAGTTTACCCCTCTATCAGCAAAAATACTTGTTCCCTCCATTCTTACCAATAATAT		intergenic							1060.51	212.09	8.92646	7.44263
ASHGA5P021884	7.97082	7.97082	2.99473	up	noncoding	uc010zay.1	LOC150776	UCSC_knowngene	1165	chr2	+	132250385	132273320		CGCCTCCCAGGTTTTTGTTGAAATGTGGCTTCATCACTATTCGTTGGAGATGTATCAAAA	150776	bidirectional	NM_001085365	MZT2A	mitotic-spindle organizing protein 2A	-	132241532	132250064	498.427	46.9759	8.04212	5.04739
ASHGA5P022340	8.20939	8.20939	3.03728	up	noncoding	ENST00000554852	MEG8	GENCODE	557	chr14	+	101361225	101373343		GCCCTGACAGCAGCTTGTGTTTCTTCCTTCAAGAGTCTGCTTAGAGATAATAAAGATCAA	79104	intergenic							124.565	15.0853	6.38314	3.34587
ASHGA5P041747	10.5089	10.5089	3.39354	up	noncoding	ENST00000452229	ZNRD1-AS1	GENCODE	3653	chr6	-	30024529	30028756		GTTTTCATTTGTGTTGCCATCAGCCTCCTCTATAAATAAACCCAGAGTAACCACAAATTG	80862	bidirectional	NM_014596	ZNRD1	DNA-directed RNA polymerase I subunit RPA12	+	30029035	30032686	1032.72	63.2759	8.89464	5.5011
ASHGA5P041747	10.5089	10.5089	3.39354	up	noncoding	ENST00000452229	ZNRD1-AS1	GENCODE	3653	chr6	-	30024529	30028756		GTTTTCATTTGTGTTGCCATCAGCCTCCTCTATAAATAAACCCAGAGTAACCACAAATTG	80862	bidirectional	NM_170783	ZNRD1	DNA-directed RNA polymerase I subunit RPA12	+	30029035	30032686	1032.72	63.2759	8.89464	5.5011
ASHGA5P056311	42.6275	42.6275	5.41371	up	noncoding	TCONS_00002218	XLOC_000529	LincRNAs identified by Cabili et al	2298	chr1	+	203343729	203369257		TGCCCTTCAACATCACCGAGAACTACTGCCATCAGCTATATAATGAAACTATTTTTAAGC		intergenic							8149.77	106.314	11.7457	6.33204
ASHGA5P052329	3.31638	3.31638	1.72961	up	noncoding	ENST00000513626	RP11-213H15.3	GENCODE	2672	chr5	-	90606837	90610219		CTGTCCTCATCTCCCAATGAAAAGGTATTGTAAATAAAGAGAAAGATCAGAGGCTTATTT		intergenic							156.097	43.3339	6.65323	4.92363
ASHGA5P057100	3.84396	3.84396	1.94259	up	noncoding	TCONS_00013320	XLOC_005968	LincRNAs identified by Cabili et al	3042	chr7	+	2482208	2488305	TCONS_00013321	AACAAAGACAGAGCTGCTTCCCTCCTGTTGGGTCTCTGGCGGACAGTCAGATGGGGAAAG		intergenic							2016.17	268.203	9.75687	7.81428
ASHGA5P032702	2.70299	2.70299	1.43455	up	noncoding	ENST00000572590	RP11-1055B8.8	GENCODE	424	chr17	-	79428038	79428963		GGGTCCTCGTCGTCTGAGCTGTAGGACGAGTCCTCGTTGTCGGAGGAGCAGAGGCTGGAG		natural antisense	NM_001080519	BAHCC1	BAH and coiled-coil domain-containing protein 1	+	79373539	79433358	58.7545	24.3617	5.47924	4.04469
ASHGA5P036503	54.3196	54.3196	5.7634	up	noncoding	TCONS_00027180	XLOC_013220	LincRNAs identified by Cabili et al	288	chr19	-	10349735	10361691		CCGTGCCCTTTTGCAGTCAACCTCTCCTGTCCCAATATTTCACCGTCCCTATAGTTTTTT		intergenic							47617.3	604.412	14.8905	9.12713
ASHGA5P048815	2.2919	2.2919	1.19655	up	noncoding	ENST00000559954	RP11-762H8.3	GENCODE	388	chr15	-	78542843	78556329		GGCCTTCCAGTTGAGGTACAGGGGTCCTTTGCTGGCCCCAGATGTGGACAGTATCCTCTC		bidirectional	NM_001130182	DNAJA4	dnaJ homolog subfamily A member 4 isoform 2	+	78556988	78574538	20.4783	11.0091	4.10279	2.90624
ASHGA5P048815	2.2919	2.2919	1.19655	up	noncoding	ENST00000559954	RP11-762H8.3	GENCODE	388	chr15	-	78542843	78556329		GGCCTTCCAGTTGAGGTACAGGGGTCCTTTGCTGGCCCCAGATGTGGACAGTATCCTCTC		bidirectional	NM_018602	DNAJA4	dnaJ homolog subfamily A member 4 isoform 1	+	78556486	78574538	20.4783	11.0091	4.10279	2.90624
ASHGA5P033524	2.0059	2.0059	1.00425	up	noncoding	NR_040031	LOC100288122	RefSeq	2196	chr18	-	13419497	13427533		ATAAATCACAAAATGTAGTAGCCAGTTAACAAGACACAGGTGTTGCTCCCCTGAAAGTGC	100288122	intronic antisense	NM_181481	C18orf1	uncharacterized protein C18orf1 isoform alpha 1	+	13218785	13652753	19.0603	11.8057	4.00645	3.00221
ASHGA5P033524	2.0059	2.0059	1.00425	up	noncoding	NR_040031	LOC100288122	RefSeq	2196	chr18	-	13419497	13427533		ATAAATCACAAAATGTAGTAGCCAGTTAACAAGACACAGGTGTTGCTCCCCTGAAAGTGC	100288122	intronic antisense	NM_181482	C18orf1	uncharacterized protein C18orf1 isoform alpha 2	+	13218785	13652753	19.0603	11.8057	4.00645	3.00221
ASHGA5P027506	621.723	621.723	9.28013	up	noncoding	ENST00000551844	RP11-394J1.2	GENCODE	525	chr12	-	96616574	96617751		TGAGGAGCTTGAATTCACCATCGTTCGAGGTCCAGCAGATCAAATGCTCATGTTTCTGAT		natural antisense	NM_005230	ELK3	ETS domain-containing protein Elk-3	+	96588206	96661606	7454.61	5	11.6014	2.32125
ASHGA5P027239	366.477	366.477	8.51758	up	noncoding	BF115242		LincRNAs identified by Khalil et al	536	chr8	+	110243949	110244832		ACAGGGTAGGGTCCTTAGCAAACTTCTTCTTTCTGTGAGCTTTAATGGTCAATCACAGGG		intergenic							4388.1	5	10.8388	2.32125
ASHGA5P041614	2.95925	2.95925	1.56523	up	noncoding	ENST00000511517	CTC-338M12.6	GENCODE	738	chr5	+	180626367	180630101		GCCCCATAATGACTGTTCTTAACCCATCTATGGATTGTGAAGTTTATCTAGTTGTTTATA		intronic antisense	NM_203293	TRIM7	tripartite motif-containing protein 7 isoform 1	-	180620923	180632177	41.0764	16.2734	5.02139	3.45616
ASHGA5P041614	2.95925	2.95925	1.56523	up	noncoding	ENST00000511517	CTC-338M12.6	GENCODE	738	chr5	+	180626367	180630101		GCCCCATAATGACTGTTCTTAACCCATCTATGGATTGTGAAGTTTATCTAGTTGTTTATA		intronic antisense	NM_203294	TRIM7	tripartite motif-containing protein 7 isoform 3	-	180620923	180631340	41.0764	16.2734	5.02139	3.45616
ASHGA5P041614	2.95925	2.95925	1.56523	up	noncoding	ENST00000511517	CTC-338M12.6	GENCODE	738	chr5	+	180626367	180630101		GCCCCATAATGACTGTTCTTAACCCATCTATGGATTGTGAAGTTTATCTAGTTGTTTATA		intronic antisense	NM_203295	TRIM7	tripartite motif-containing protein 7 isoform 3	-	180620923	180631340	41.0764	16.2734	5.02139	3.45616
ASHGA5P041614	2.95925	2.95925	1.56523	up	noncoding	ENST00000511517	CTC-338M12.6	GENCODE	738	chr5	+	180626367	180630101		GCCCCATAATGACTGTTCTTAACCCATCTATGGATTGTGAAGTTTATCTAGTTGTTTATA		intronic antisense	NM_203296	TRIM7	tripartite motif-containing protein 7 isoform 3	-	180620923	180631340	41.0764	16.2734	5.02139	3.45616
ASHGA5P041614	2.95925	2.95925	1.56523	up	noncoding	ENST00000511517	CTC-338M12.6	GENCODE	738	chr5	+	180626367	180630101		GCCCCATAATGACTGTTCTTAACCCATCTATGGATTGTGAAGTTTATCTAGTTGTTTATA		intronic antisense	NM_203297	TRIM7	tripartite motif-containing protein 7 isoform 2	-	180620923	180627930	41.0764	16.2734	5.02139	3.45616
ASHGA5P030525	122.042	122.042	6.93123	up	noncoding	TCONS_00008509	XLOC_003993	LincRNAs identified by Cabili et al	344	chr4	-	78076011	78076648		CACCATCAGAGAAATGAAGAGTTTGTGATCAAAGCATGAAGGAGACTGGGGATGTTTTTT		intergenic							3978.79	19.9456	10.6838	3.7526
ASHGA5P038851	2.78794	2.78794	1.4792	up	noncoding	ENST00000468961	THOC7-AS1	GENCODE	673	chr3	+	63846320	63847495		CTCTTCCTCTAATCATTCTGCACATAACAGAGACAGTGTGTATGTGTGTGTGTGTTTTTT		intronic antisense	NM_025075	THOC7	THO complex subunit 7 homolog	-	63819545	63849597	6450.65	982.764	11.3811	9.90188
ASHGA5P019101	185.604	185.604	7.53608	up	noncoding	NR_027639	ADAM9	RefSeq	3912	chr8	+	38854504	38962779		TGCTGGAAAGAAATGAATACTGCATTGAGGGACGGACTTCTGGTCTTCTTCTTCCTAATT	8754	exon sense-overlapping	NM_003816	ADAM9	disintegrin and metalloproteinase domain-containing protein 9 precursor	+	38854504	38962779	2381.45	6.72523	9.96217	2.42609
ASHGA5P018057	17.6179	17.6179	4.13897	up	noncoding	ENST00000448958	AP006222.2	GENCODE	1925	chr1	-	227894	238558	NR_029406	AGCTTACAAAGCTGCCTCGAGACGGCACCGAAAGCGAAGGAAGCTCCTGCTCCTCCTAAA		intergenic							160.959	8.34627	6.68715	2.54818
ASHGA5P035920	5.79739	5.79739	2.5354	up	noncoding	ENST00000416229	AC007040.6	GENCODE	477	chr2	+	71221639	71229884		CTCTGACAAGCTGGCTCCTCTCCTCAGAAAAAAGAAAGAAACAAAGAGAAGAGGATGACA		natural antisense	NM_144582	TEX261	protein TEX261	-	71213067	71222001	520.562	65.705	8.1027	5.5673
ASHGA5P043172	42.0995	42.0995	5.39573	up	noncoding	uc003uhk.1	AY927633	UCSC_knowngene	4649	chr7	-	81205702	81320722		CTTTGAGATGTCAACTAAAGGAACATGGCCTCCTCATCTCTAAATACACCTGGCTAACAG		intergenic							1141.6	18.1766	9.01381	3.61808
ASHGA5P057894	46.2746	46.2746	5.53215	up	noncoding	TCONS_00023414	XLOC_011259	LincRNAs identified by Cabili et al	519	chr15	+	53375072	53393924		CTGCAAAGGTTTCTTCTCAGGATATATGAAAAACCATCACATATCATGCTGAAATCAAGA		intergenic							430.091	5	7.8534	2.32125
ASHGA5P053810	15.5728	15.5728	3.96096	up	noncoding	NR_024408	LOC253039	RefSeq	3806	chr9	+	123605319	123616651		TAGCCAGTGGTTGCGGCTCCCTCAGTCTGGCGTCATCTAGGTCGCTGCTCAGGGAAATGC	253039	bidirectional	NM_001270427	PSMD5	26S proteasome non-ATPase regulatory subunit 5 isoform 2	-	123578331	123605299	392.583	20.3944	7.74946	3.7885
ASHGA5P053810	15.5728	15.5728	3.96096	up	noncoding	NR_024408	LOC253039	RefSeq	3806	chr9	+	123605319	123616651		TAGCCAGTGGTTGCGGCTCCCTCAGTCTGGCGTCATCTAGGTCGCTGCTCAGGGAAATGC	253039	bidirectional	NM_005047	PSMD5	26S proteasome non-ATPase regulatory subunit 5 isoform 1	-	123578331	123605299	392.583	20.3944	7.74946	3.7885
ASHGA5P022899	11.046	11.046	3.46545	up	noncoding	NR_023348	GAS8	RefSeq	3267	chr16	+	90089007	90111352		ATGAGCAAGGAGCAGGTGAAGTTGAGTCCTCCCTCTTTCTTCCTTGCCTTTCGCCGGCCA	2622	exon sense-overlapping	NM_001481	GAS8	growth arrest-specific protein 8	+	90089007	90111379	20386.7	935.913	13.284	9.81853
ASHGA5P022899	11.046	11.046	3.46545	up	noncoding	NR_023348	GAS8	RefSeq	3267	chr16	+	90089007	90111352		ATGAGCAAGGAGCAGGTGAAGTTGAGTCCTCCCTCTTTCTTCCTTGCCTTTCGCCGGCCA	2622	intronic antisense	NM_001214	C16orf3	uncharacterized protein C16orf3	-	90095315	90096309	20386.7	935.913	13.284	9.81853
ASHGA5P030857	67.1177	67.1177	6.06862	up	noncoding	TCONS_00006207	XLOC_002805	LincRNAs identified by Cabili et al	708	chr3	+	127574633	127577830		TTTGAGAGCAGCACTCTCGGTGACACATACTCAATTCTGCTCCTCCAGTGCAAAAGCAGC		intergenic							717.026	6.47647	8.47208	2.40346
ASHGA5P023173	12.0141	12.0141	3.58665	up	noncoding	ENST00000572353	RP11-353N14.4	GENCODE	540	chr17	+	77893172	77899261		AACGCCTCAGTGACGACCATTTGTGAGCCATCTCTCTGTCTCAGGCACGGTGCTACATGC		intergenic							628.196	38.7383	8.33724	4.75059
ASHGA5P000317	7.46926	7.46926	2.90096	up	noncoding	chr18:58292100-58302600-	chr18:58292100-58302600	LincRNAs identified by Khalil et al	10500	chr18	-	60141120	60151620		TTGTATAAATAGTTCTGAGACTCCCTTCTATTTTTCTTCCTTCCTGAAGACAATCCGCAA		intergenic							9371.48	583.459	11.9629	9.0619
ASHGA5P029320	48.0828	48.0828	5.58745	up	noncoding	TCONS_00010233	XLOC_004700	LincRNAs identified by Cabili et al	904	chr5	-	1041886	1042973	TCONS_00010232	ATTCGTTCACACACCCATTCACAAACCCAGTCGTTCATACACCCATTCACACACTAACTC		intergenic							128584	2040.6	16.5885	11.001
ASHGA5P034676	2.1529	2.1529	1.10628	up	noncoding	uc002ped.1	DKFZp434J0226	UCSC_knowngene	1316	chr19	+	46706682	46715832		AAAGATACAGGATCTTCCACACACACAGATCTGACCACATACATCCCCTGCTGGGAATAA	93429	intergenic							128955	51396.6	16.6114	15.5051
ASHGA5P003749	6.26661	6.26661	2.64768	up	noncoding	ENST00000414507	PMS2P4	GENCODE	455	chr7	-	66760604	66767406	ENST00000437568, ENST00000533167, NR_003614, NR_022007, NR_023383, NR_027776, NR_028058, NR_046297, NR_046299, uc003tvo.2, uc003txn.4, uc003uca.4, uc003ucm.3, uc003ucq.3, uc003udq.3, uc010lbw.2, uc011kep.2, uc011kfp.2, uc011kfr.1, uc011kft.1, uc011kfv.1, uc022agj.1	AAGAAGAAAACTTTGAAGGCTTAACGATGTCACCATTTCTACCTGCCACGCATCGGCGAA	5382	intergenic							40.8755	5.88198	5.01649	2.3688
ASHGA5P043336	4.01451	4.01451	2.00522	up	noncoding	NR_004382	MESTIT1	RefSeq	3242	chr7	-	130126897	130131013		TCACCACAGTCCCCTAAGGAAAACAGCTACTTTCTTTCAGACAGGCAATTTTCTAGCTGC	317751	intronic antisense	NM_001253901	MEST	mesoderm-specific transcript homolog protein isoform d precursor	+	130126015	130146138	61.0574	17.1847	5.53517	3.52994
ASHGA5P043336	4.01451	4.01451	2.00522	up	noncoding	NR_004382	MESTIT1	RefSeq	3242	chr7	-	130126897	130131013		TCACCACAGTCCCCTAAGGAAAACAGCTACTTTCTTTCAGACAGGCAATTTTCTAGCTGC	317751	intronic antisense	NM_001253902	MEST	mesoderm-specific transcript homolog protein isoform d precursor	+	130126187	130146138	61.0574	17.1847	5.53517	3.52994
ASHGA5P043336	4.01451	4.01451	2.00522	up	noncoding	NR_004382	MESTIT1	RefSeq	3242	chr7	-	130126897	130131013		TCACCACAGTCCCCTAAGGAAAACAGCTACTTTCTTTCAGACAGGCAATTTTCTAGCTGC	317751	intronic antisense	NM_177524	MEST	mesoderm-specific transcript homolog protein isoform b precursor	+	130126015	130146138	61.0574	17.1847	5.53517	3.52994
ASHGA5P044244	2.75004	2.75004	1.45945	up	noncoding	ENST00000519032	RP11-350F16.2	GENCODE	460	chr8	-	47842461	47846068		TTATCAGCTGTGCATCCATCTTCTAGCAGCTTCTGTGTCTTTTCTCCCTGGAATGTTCTC		intergenic							579.341	139.754	8.23365	6.77419
ASHGA5P038615	6.85608	6.85608	2.77738	up	noncoding	ENST00000436121	RP11-550H2.1	GENCODE	369	chr1	+	76477008	76485041		GAACACATCCATTTTCCCAGTATAGTTGAATGCAGGGTTTAATAAATGGAATGAATCTAG		intergenic							57663.9	5442.89	15.2661	12.4887
ASHGA5P047182	52.7682	52.7682	5.7216	up	noncoding	ENST00000423232	RP13-137A17.5	GENCODE	604	chr10	-	134774843	134775741		AGCTGGTGACATCCTCTTCTTCACATTTTTAAAGCTTAAAAATAAAAGTCCTGGATCCAA		intergenic							2164.2	25.5507	9.84194	4.12035
ASHGA5P015474	3.72422	3.72422	1.89694	up	noncoding	ENST00000420585	RP5-1158E12.1	GENCODE	767	chrX	-	45772701	45776475		AAGAAGAAAGGAGATTCCTCTTGCAAAAGAAGCCAAGTATAAACATGGAAGAACAACTGC		intergenic							49.8198	15.3579	5.26791	3.37097
ASHGA5P030459	2.17065	2.17065	1.11813	up	noncoding	ENST00000559022	RP11-521C20.3	GENCODE	461	chr15	+	40381032	40381587		GATCACTAAGCCAATTAAAAACAACCAGCCAGAAAGAACCTTTCTCCTTCCTGACAGCTA		natural antisense	NM_001003940	BMF	bcl-2-modifying factor isoform bmf-1	-	40380091	40401075	42.2917	22.6088	5.05856	3.94044
ASHGA5P030459	2.17065	2.17065	1.11813	up	noncoding	ENST00000559022	RP11-521C20.3	GENCODE	461	chr15	+	40381032	40381587		GATCACTAAGCCAATTAAAAACAACCAGCCAGAAAGAACCTTTCTCCTTCCTGACAGCTA		natural antisense	NM_001003942	BMF	bcl-2-modifying factor isoform bmf-2	-	40380091	40398287	42.2917	22.6088	5.05856	3.94044
ASHGA5P030459	2.17065	2.17065	1.11813	up	noncoding	ENST00000559022	RP11-521C20.3	GENCODE	461	chr15	+	40381032	40381587		GATCACTAAGCCAATTAAAAACAACCAGCCAGAAAGAACCTTTCTCCTTCCTGACAGCTA		natural antisense	NM_001003943	BMF	bcl-2-modifying factor isoform bmf-3	-	40380091	40398287	42.2917	22.6088	5.05856	3.94044
ASHGA5P030459	2.17065	2.17065	1.11813	up	noncoding	ENST00000559022	RP11-521C20.3	GENCODE	461	chr15	+	40381032	40381587		GATCACTAAGCCAATTAAAAACAACCAGCCAGAAAGAACCTTTCTCCTTCCTGACAGCTA		natural antisense	NM_033503	BMF	bcl-2-modifying factor isoform bmf-1	-	40380091	40398639	42.2917	22.6088	5.05856	3.94044
ASHGA5P017023	55.3814	55.3814	5.79133	up	noncoding	ENST00000436765	CYP4F29P	GENCODE	624	chr21	-	15219079	15220526		AAGGCATCAAGGCCTGTGACCTTGTGCACAACTTTAGACACCATCATCCTGGAGCAGCCC		intergenic							37050.3	432.944	14.3626	8.57128
ASHGA5P032207	20.0423	20.0423	4.32498	up	noncoding	ENST00000580996	RP11-138I1.2	GENCODE	2166	chr17	-	16317837	16320003		ACTGCTAAAATCAGACCTCACCACCAACGGGGCCCTGGTCTGGACTCAGTCTTGGAGCTT		natural antisense	NM_016113	TRPV2	transient receptor potential cation channel subfamily V member 2	+	16318855	16340317	307.62	12.9033	7.45508	3.1301
ASHGA5P023099	39.6406	39.6406	5.30891	up	noncoding	ENST00000569858	RP11-72I8.1	GENCODE	2598	chr16	+	15188267	15203054		AAATATTAAGTTTCCTCAGACTAGAAGGGAGAGAAATGCACACACATGATCCACCAGCCC		intron sense-overlapping	ENST00000535621	PDXDC1	pyridoxal-dependent decarboxylase domain containing 1 [Source:HGNC Symbol;Acc:28995]	+	15068868	15233196	5075.15	73.5079	11.051	5.74207
ASHGA5P023099	39.6406	39.6406	5.30891	up	noncoding	ENST00000569858	RP11-72I8.1	GENCODE	2598	chr16	+	15188267	15203054		AAATATTAAGTTTCCTCAGACTAGAAGGGAGAGAAATGCACACACATGATCCACCAGCCC		natural antisense	ENST00000358815	NPIPP1	nuclear pore complex interacting protein pseudogene 1 [Source:HGNC Symbol;Acc:35407]	-	15198579	15225458	5075.15	73.5079	11.051	5.74207
ASHGA5P023099	39.6406	39.6406	5.30891	up	noncoding	ENST00000569858	RP11-72I8.1	GENCODE	2598	chr16	+	15188267	15203054		AAATATTAAGTTTCCTCAGACTAGAAGGGAGAGAAATGCACACACATGATCCACCAGCCC		natural antisense	ENST00000534799	NPIPP1	nuclear pore complex interacting protein pseudogene 1 [Source:HGNC Symbol;Acc:35407]	-	15198177	15215759	5075.15	73.5079	11.051	5.74207
ASHGA5P023099	39.6406	39.6406	5.30891	up	noncoding	ENST00000569858	RP11-72I8.1	GENCODE	2598	chr16	+	15188267	15203054		AAATATTAAGTTTCCTCAGACTAGAAGGGAGAGAAATGCACACACATGATCCACCAGCCC		natural antisense	ENST00000547107	NPIPP1	nuclear pore complex interacting protein pseudogene 1 [Source:HGNC Symbol;Acc:35407]	-	15198186	15217355	5075.15	73.5079	11.051	5.74207
ASHGA5P034689	4.10153	4.10153	2.03616	up	noncoding	NR_038452	NAPA-AS1	RefSeq	656	chr19	+	47987538	48004854		GGAAGGTCGAATCATCATCATCATAAAACTTAATATTGCCCTTATGTGCCAGGAACTACT	100505681	natural antisense	NM_003827	NAPA	alpha-soluble NSF attachment protein	-	47990890	48018515	57616.2	9098.4	15.2617	13.2256
ASHGA5P028005	11.9524	11.9524	3.57923	up	noncoding	ENST00000575924	OR7E5P	GENCODE	449	chr12	+	52478527	52486069		ACCCTTTGCTGCCTGCTGGTTCCCAATTTTGAATGTATCTTTTTGTTTAAAATGTCTTTG		intergenic							1969.12	94.8995	9.72502	6.1458
ASHGA5P046917	37.131	37.131	5.21455	up	noncoding	TCONS_00015031	XLOC_007110	LincRNAs identified by Cabili et al	254	chr8	-	67122576	67123886		AGAATATTGCTCACTCATCTCTTTGAAAGGACCTCAGACTGCAGAGCAGAAGAACCACTG		intergenic							32837.1	542.085	14.1594	8.94484
ASHGA5P040830	6.24268	6.24268	2.64217	up	noncoding	ENST00000509655	CTB-109A12.1	GENCODE	1992	chr5	-	156790389	156792509		ATTGTTACGACTTTGCTCGTTCCCCTCTCTGGAATAAAAATGGTAAAACTCTGTCTCTTA		intronic antisense	NM_001037332	CYFIP2	cytoplasmic FMR1-interacting protein 2	+	156693186	156822606	617.736	70.1262	8.31587	5.6737
ASHGA5P040830	6.24268	6.24268	2.64217	up	noncoding	ENST00000509655	CTB-109A12.1	GENCODE	1992	chr5	-	156790389	156792509		ATTGTTACGACTTTGCTCGTTCCCCTCTCTGGAATAAAAATGGTAAAACTCTGTCTCTTA		intronic antisense	NM_001037333	CYFIP2	cytoplasmic FMR1-interacting protein 2	+	156693090	156822606	617.736	70.1262	8.31587	5.6737
ASHGA5P040830	6.24268	6.24268	2.64217	up	noncoding	ENST00000509655	CTB-109A12.1	GENCODE	1992	chr5	-	156790389	156792509		ATTGTTACGACTTTGCTCGTTCCCCTCTCTGGAATAAAAATGGTAAAACTCTGTCTCTTA		intronic antisense	NM_014376	CYFIP2	cytoplasmic FMR1-interacting protein 2	+	156696361	156822606	617.736	70.1262	8.31587	5.6737
ASHGA5P015295	58.7722	58.7722	5.87706	up	noncoding	ENST00000418950	RP1-283E3.4	pseudogene	499	chr1	+	1667255	1668690		GGTGGTGAGAAATTATCATAATCTTTGTTCTTCTTCTGCCACTGAAATAATTCCAGAACA									571.113	5.21166	8.21095	2.33389
ASHGA5P036399	4.67683	4.67683	2.22553	up	noncoding	TCONS_00026337	XLOC_012684	LincRNAs identified by Cabili et al	273	chr18	+	53665693	53690658		TGTCGCCTCAGCAACTTGTCCATATCATTGTTACAGCACTTACCACACAGTTGTAAGACG		intronic antisense	ENST00000382897	AC006305.1	HCG2045177; Uncharacterized protein; cDNA FLJ45743 fis, clone KIDNE2016464 [Source:UniProtKB/TrEMBL;Acc:Q6ZS83]	-	53670843	53858493	91.0976	20.2706	6.00447	3.77894
ASHGA5P021040	5.38444	5.38444	2.4288	up	noncoding	ENST00000523789	EXTL3-AS1	GENCODE	542	chr8	-	28555728	28558047		TTGGGCTAAGGATAACTTCCTCTACTTGGCTCTCCTCCAAAGGTACGCGGCCACAGCAGG		intronic antisense	ENST00000523149	EXTL3	exostoses (multiple)-like 3 [Source:HGNC Symbol;Acc:3518]	+	28480245	28608420	2935.39	267.998	10.2425	7.81375
ASHGA5P042502	3.14326	3.14326	1.65226	up	noncoding	uc001gch.1	AF268386	UCSC_knowngene	4462	chr1	+	162751900	162756362		GGGGTAAAGGGCAAATGGATTTAATTTCTGCTTAAAACTATCATAGACGTTCCAAATAGA		intergenic							18.5503	5	3.97351	2.32125
ASHGA5P052813	7.97817	7.97817	2.99606	up	noncoding	uc003prp.3	AK123416	UCSC_knowngene	2458	chr6	-	107218004	107222877		ATTTATCAGGAGAACTTCTCCCACTCTCCTCTCAGTCCTTGGGGATCTGATGAAATGACA		intergenic							5225.28	317.703	11.0858	8.08974
ASHGA5P044086	3.1419	3.1419	1.65164	up	noncoding	ENST00000448988	RP11-372M18.1	GENCODE	492	chr1	+	209498800	209501877		GAGCTGCTCTATGTTTAATCATCATCATGTCACCATCAAAAATATTTATTAAACCGCTGC		intergenic							70934.1	15745.1	15.6301	13.9785
ASHGA5P029321	3.65481	3.65481	1.8698	up	noncoding	TCONS_00010234	XLOC_004700	LincRNAs identified by Cabili et al	1647	chr5	-	1042002	1043709	TCONS_00010232, TCONS_00010233, TCONS_00010236	CCATTCACACACGATCTCACCCATTCATTCACAAACTCACCCACTCGTTCACAGCCACTC		intergenic							111182	22342.3	16.3647	14.4949
ASHGA5P029809	2.14936	2.14936	1.10391	up	noncoding	ENST00000556332	RP11-894P9.2	GENCODE	553	chr14	+	104019757	104028214		TAAAGAAGAGCGACCGGGACAGCGCTGAAGGGCACCACCTTGGGCTTTCGAGGCCCAACA		intronic antisense	NM_001015048	BAG5	BAG family molecular chaperone regulator 5 isoform b	-	104022880	104029151	204.878	79.6669	6.97567	5.87176
ASHGA5P029809	2.14936	2.14936	1.10391	up	noncoding	ENST00000556332	RP11-894P9.2	GENCODE	553	chr14	+	104019757	104028214		TAAAGAAGAGCGACCGGGACAGCGCTGAAGGGCACCACCTTGGGCTTTCGAGGCCCAACA		intronic antisense	NM_001015049	BAG5	BAG family molecular chaperone regulator 5 isoform a	-	104022880	104028655	204.878	79.6669	6.97567	5.87176
ASHGA5P029809	2.14936	2.14936	1.10391	up	noncoding	ENST00000556332	RP11-894P9.2	GENCODE	553	chr14	+	104019757	104028214		TAAAGAAGAGCGACCGGGACAGCGCTGAAGGGCACCACCTTGGGCTTTCGAGGCCCAACA		intronic antisense	NM_004873	BAG5	BAG family molecular chaperone regulator 5 isoform b	-	104022880	104028655	204.878	79.6669	6.97567	5.87176
ASHGA5P041672	187.91	187.91	7.5539	up	noncoding	TCONS_00020575	XLOC_009891	LincRNAs identified by Cabili et al	349	chr12	+	115334602	115336010		CCTCATTCTGAGAGGTGGAGTCTAATTTTCTTCTTCTTGAACCTGTCTGGCTCTAGCAAC		intergenic							2215.42	5	9.87515	2.32125
ASHGA5P051996	2.71975	2.71975	1.44347	up	noncoding	NR_038841	LOC100506746	RefSeq	1945	chr4	-	87846045	87856002		GAACCCTTTCACTTTACGGCGAGATTAAGCTCAGGGTCAAGTTCTGAGCAAAAAGTGTCA	100506746	exon sense-overlapping	ENST00000473559	C4orf36	chromosome 4 open reading frame 36 [Source:HGNC Symbol;Acc:28386]	-	87807624	87855884	18.6923	8.23704	3.9839	2.54043
ASHGA5P042035	22.5445	22.5445	4.49471	up	noncoding	ENST00000419061	RP1-69D17.4	GENCODE	358	chr6	-	129860492	129867773		AGAGTATCACACCCATGCTATACCCTTTGATTCATTAGCTTGCTCTGTTTTTCTGTTATT		intronic antisense	ENST00000563385	RP11-73O6.4	Uncharacterized protein [Source:UniProtKB/TrEMBL;Acc:H3BR05]	+	126112110	130461627	2270.8	59.7382	9.9119	5.4172
ASHGA5P049956	3.00558	3.00558	1.58764	up	noncoding	ENST00000520017	RP11-10A14.3	GENCODE	651	chr8	+	8998933	9002945		CTGGCTTCATTCTTGCTGCTCAGCTGAATACAAGGCCTCAGTGGTTTGCTGGGCTTTGGT		natural antisense	NM_001201329	PPP1R3B	protein phosphatase 1 regulatory subunit 3B	-	8993763	9009152	18.2281	5.72723	3.94875	2.36111
ASHGA5P049956	3.00558	3.00558	1.58764	up	noncoding	ENST00000520017	RP11-10A14.3	GENCODE	651	chr8	+	8998933	9002945		CTGGCTTCATTCTTGCTGCTCAGCTGAATACAAGGCCTCAGTGGTTTGCTGGGCTTTGGT		natural antisense	NM_024607	PPP1R3B	protein phosphatase 1 regulatory subunit 3B	-	8993763	9008220	18.2281	5.72723	3.94875	2.36111
ASHGA5P027545	3.00438	3.00438	1.58707	up	noncoding	TCONS_00012135	XLOC_005667	LincRNAs identified by Cabili et al	459	chr6	-	28996285	29003941		CAGAACATCCACTCATGTTGGATTGGTAAATTCCATAGATTAAAACAACTCTGGCTATTT		intergenic							17.6714	5	3.90832	2.32125
ASHGA5P035675	117.204	117.204	6.87288	up	noncoding	ENST00000430529	AC079779.6	GENCODE	845	chr2	+	317911	336465		TCGGATACTGGCATGATAGGTCCATGAATGCATATGTTCACCCACACACTAATATATACC		intergenic							10320.5	53.3955	12.1139	5.24103
ASHGA5P022799	6.93403	6.93403	2.7937	up	noncoding	ENST00000562996	RP11-923I11.5	GENCODE	427	chr12	+	52242006	52246513		ACGCAGGTTCTGGAACTTGCCAAGGTTCCAGGGGTTGAGCCCACTCCATCCTGTCCAAAG		intergenic							3099.83	224.141	10.3175	7.52385
ASHGA5P042176	2.71147	2.71147	1.43908	up	noncoding	TCONS_00020815	XLOC_010104	LincRNAs identified by Cabili et al	500	chr12	-	58488695	58491865		ACAAGTTCCACCCACTGCCTGAGAGTCCTGCCCTGAATTTTAGACTTTGATCATAAAAAA		intergenic							12813.6	2095.38	12.4843	11.0452
ASHGA5P058284	33.6609	33.6609	5.073	up	noncoding	TCONS_00029180	XLOC_014119	LincRNAs identified by Cabili et al	469	chr21	-	46398626	46399161		CGCGCCCCACACCCGCCCCACACGCGCCCCACACCCGCCCCACACGCGCCCCACACACGT		intergenic							27024.2	474.961	13.8001	8.72715
ASHGA5P018406	2.29819	2.29819	1.2005	up	noncoding	NR_038893	CBR3-AS1	RefSeq	1500	chr21	-	37504064	37528606		ACCCCATAAGGAAAACTAGACAATCCACCAGCCCAGGAGGGGACAAGCAGGCTTATTCCT	100506428	natural antisense	NM_001236	CBR3	carbonyl reductase [NADPH] 3	+	37507262	37518860	32.8489	17.2362	4.73624	3.53575
ASHGA5P017807	4.60461	4.60461	2.20308	up	noncoding	ENST00000446028	RP11-431N15.2	GENCODE	713	chrX	+	56644823	56650891		GATATTCAAGATCATTATGTCCATGCCAGAGAAATCAAGTTATACCACCACTTCTTGGCC		intergenic							28.0407	5	4.52433	2.32125
ASHGA5P038093	56.8121	56.8121	5.82813	up	noncoding	ENST00000437047	AC034187.2	GENCODE	561	chr3	-	8615411	8634810		GTGGCCACAGTAGAATCTCTTTTCTCTTTCTTCTTTATTCCCTAAAGTCTTAAAGATAAC		intergenic							9571.15	96.0383	11.9932	6.16502
ASHGA5P035697	106.577	106.577	6.73575	up	noncoding	ENST00000450695	AC013460.1	GENCODE	518	chr2	+	7561422	7562966		GAGAACACCATCAGATGATCTTTCTGCCCAGAGCCACTATCTGTCCCTAAATATCAGGTT		intergenic							2695.26	15.3445	10.1056	3.36988
ASHGA5P020651	6.12747	6.12747	2.61529	up	noncoding	ENST00000517998	RBM12B-AS2	GENCODE	696	chr8	+	94745443	94746250		TTCTAAAATCATCAGAAGGGCATCTAAAATCTTCCTCCTGGGGGCTCCTGAAGTCCTCAT		natural antisense	NM_203390	RBM12B	RNA-binding protein 12B	-	94743730	94753224	488.323	59.2592	8.02202	5.40673
ASHGA5P031992	4.28091	4.28091	2.09792	up	noncoding	ENST00000568633	RP5-1142A6.3	GENCODE	2096	chr16	+	88739803	88741899		GGCTTACTTGGAGTTCTCTTTAATTCTGACATAGAAGTTCGCACAATCCCTCTTTTACAG		intergenic							26.0713	5	4.41917	2.32125
ASHGA5P027135	2.85959	2.85959	1.51581	up	noncoding	NR_038227	LOC100506451	RefSeq	977	chr12	-	26107587	26110518		TTTGACCTTTAGTTACTCCACACCTCATTAGTTCCTTGACCTGCAGGTGGACTGAGAAGA	100506451	intergenic							20468	3409.73	13.2951	11.7793
ASHGA5P025816	2.78412	2.78412	1.47722	up	noncoding	NR_038238	LOC151484	RefSeq	1893	chr2	+	231751260	231769232		AGCACAACTGCTACCACCAGGACACAGTGAGGAGGTGGTCATCAGCAACCCAGGAAGAGT	151484	intergenic							34.1313	14.6574	4.78556	3.30834
ASHGA5P048272	2.78516	2.78516	1.47776	up	noncoding	AK054953		LincRNAs identified by Khalil et al	2228	chr3	+	160981722	160983945		TTGAGTTCTTGTCCTTCTACCATCATCACTGGAAAAACATCTCTGGGTAGTCACTGCCTC		intergenic							52828.6	12069.9	15.0884	13.6106
ASHGA5P047012	6.19798	6.19798	2.6318	up	noncoding	TCONS_00015092	XLOC_007154	LincRNAs identified by Cabili et al	879	chr8	-	92477066	92478128		TATTTACTAGACATCCACCTGTGTCTGCTGCAATCCTGAATAGCTGGACATTTGTCTCAG		intergenic							152.794	23.5493	6.62537	3.99358
ASHGA5P052828	2.06858	2.06858	1.04864	up	noncoding	ENST00000520891	RP3-399L15.3	GENCODE	603	chr6	+	114292659	114316979	ENST00000521888	TCCCGCCCAAGCCGACCACGTGCCGCGAGCCCGGCGGGGAGAGCCCACTCCCGCGCCCCT		intronic antisense	ENST00000522371	HDAC2	histone deacetylase 2 [Source:HGNC Symbol;Acc:4853]	-	114277792	114332472	52.8436	28.6706	5.34084	4.2922
ASHGA5P030693	3.47916	3.47916	1.79874	up	noncoding	ENST00000568836	RP11-2E17.2	GENCODE	556	chr15	+	80458264	80459322		TGGGCCACCATCCAGTTCCCTTCTCCAGAGACAAAACTGTTAATCGGTGTCATACATATA		intron sense-overlapping	NM_000137	FAH	fumarylacetoacetase	+	80445232	80478924	8331.75	1039.63	11.7832	9.9845
ASHGA5P020365	37.3972	37.3972	5.22486	up	noncoding	ENST00000512284	RP11-133F8.2	GENCODE	264	chr5	-	91889149	91895740		ATAAAACCACCACATCAATTTATGCTTGCAGCTGCTTCTACTTCAACAAATACAAGTGCT		intergenic							394.558	8.06692	7.75376	2.52891
ASHGA5P028201	41.833	41.833	5.38657	up	noncoding	ENST00000547370	RP11-654D12.2	GENCODE	547	chr12	+	90276441	90330920		TCTTCATTAGTTTCTCAAATTGGTACTAAATCATCAGCATCACAACACTGGAAGGAACTG		intergenic							6236.09	84.1498	11.3436	5.95705
ASHGA5P023883	29.9761	29.9761	4.90574	up	noncoding	HMlincRNA825-	HMlincRNA825	LincRNAs identified by Khalil et al	5120	chr10	-	102419790	102424910		CCAGACACATGCACTCACACTGTCTGCCCTGTGACATCTTCATGTAGATATACATGCATT		intergenic							35658.8	717.282	14.3005	9.39478
ASHGA5P033534	4.22979	4.22979	2.08059	up	noncoding	ENST00000579247	RP11-699A5.2	GENCODE	428	chr18	-	18820635	18821332		ATTCTGGGTCATGCACACAATACAGGTTTAGTAAATAAAATCCGTATGTTTTTGGCCCCA		bidirectional	NM_001142966	GREB1L	GREB1-like protein	+	18822202	19102791	25.775	5	4.40184	2.32125
ASHGA5P038988	2.37042	2.37042	1.24514	up	noncoding	ENST00000412628	RP5-1033H22.2	GENCODE	172	chr1	+	94059941	94066319		CATGTCCTGCCTCCATGCCTTTGTCTTGTGGTCCAGCAGACAGTGACACATCTGTAGAGG		intronic antisense	NM_001261408	BCAR3	breast cancer anti-estrogen resistance protein 3 isoform 1	-	94027342	94312706	9131.84	1641.68	11.9309	10.6857
ASHGA5P038988	2.37042	2.37042	1.24514	up	noncoding	ENST00000412628	RP5-1033H22.2	GENCODE	172	chr1	+	94059941	94066319		CATGTCCTGCCTCCATGCCTTTGTCTTGTGGTCCAGCAGACAGTGACACATCTGTAGAGG		intronic antisense	NM_001261409	BCAR3	breast cancer anti-estrogen resistance protein 3 isoform 1	-	94027342	94146926	9131.84	1641.68	11.9309	10.6857
ASHGA5P038988	2.37042	2.37042	1.24514	up	noncoding	ENST00000412628	RP5-1033H22.2	GENCODE	172	chr1	+	94059941	94066319		CATGTCCTGCCTCCATGCCTTTGTCTTGTGGTCCAGCAGACAGTGACACATCTGTAGAGG		intronic antisense	NM_001261410	BCAR3	breast cancer anti-estrogen resistance protein 3 isoform 2	-	94027342	94079702	9131.84	1641.68	11.9309	10.6857
ASHGA5P038988	2.37042	2.37042	1.24514	up	noncoding	ENST00000412628	RP5-1033H22.2	GENCODE	172	chr1	+	94059941	94066319		CATGTCCTGCCTCCATGCCTTTGTCTTGTGGTCCAGCAGACAGTGACACATCTGTAGAGG		intronic antisense	NM_003567	BCAR3	breast cancer anti-estrogen resistance protein 3 isoform 1	-	94027342	94147394	9131.84	1641.68	11.9309	10.6857
ASHGA5P058142	4.63455	4.63455	2.21243	up	noncoding	TCONS_00026959	XLOC_013015	LincRNAs identified by Cabili et al	219	chr19	+	23003239	23004064		CAAGACCCAGGAATACAGTCCACCATTAAGACGGTGACTCATGTACTTGGACCAAACATA		intergenic							28.2324	5	4.53368	2.32125
ASHGA5P032324	15.9441	15.9441	3.99495	up	noncoding	ENST00000579378	RP11-218M11.3	GENCODE	280	chr17	-	28877510	28878207		AGTTCCCAGTGAAAACTGGAGGTTGCCATCACCTAACCACACATGCAATAAAGTCTTCTG		intergenic							9162.09	289.561	11.9346	7.93961
ASHGA5P039630	2.86427	2.86427	1.51817	up	noncoding	ENST00000509161	RP11-362F19.1	GENCODE	2839	chr4	-	142242282	142247161		CTGCATGATCTGAAATGTGTCTCTGAACTATAGCTTCCTGAAATTTCATTATTCTTGTAG		intergenic							171.061	53.4913	6.76121	5.24304
ASHGA5P055049	23.8551	23.8551	4.57622	up	noncoding	ENST00000534593	CTD-2337I7.1	GENCODE	720	chr11	+	78804330	78809048		AGAAAAAAGATTCTGAAAAAGGTAAGAAGCCTTGATAAATTACCACCACCTGGATTAAAA		intronic antisense	NM_001098816	ODZ4	teneurin-4	-	78364327	79151695	728.503	22.2515	8.49323	3.917
ASHGA5P046676	5.0969	5.0969	2.34962	up	noncoding	TCONS_00014638	XLOC_006732	LincRNAs identified by Cabili et al	905	chr8	+	19616322	19620042		AGGTTAGAACCTTCACAGTCAAGCACTCTTTGGGTAACCAAGTAACCTCTTCAGAGCCTT		intergenic							230.915	39.3752	7.12208	4.77246
ASHGA5P044326	20.1649	20.1649	4.33378	up	noncoding	TCONS_00014741	XLOC_006825	LincRNAs identified by Cabili et al	310	chr8	+	65919159	65930062		AACCCAGCTACTTTTTTGCCCTAAGGCATTACTCATTTTCCTGACACATTATGTTTTTAA		intergenic							936.84	31.8599	8.78971	4.45594
ASHGA5P040165	2.69879	2.69879	1.43231	up	noncoding	ENST00000514843	RP11-76G10.1	GENCODE	680	chr4	+	149067621	149130031		GGCCTTTCCAGTTTGTCCCATTATTACCTTAATTTCCAAAGAAATATTTCCTGTCACCAT		intronic antisense	NM_000901	NR3C2	mineralocorticoid receptor isoform 1	-	148999914	149363672	206.081	65.1751	6.9844	5.55209
ASHGA5P040165	2.69879	2.69879	1.43231	up	noncoding	ENST00000514843	RP11-76G10.1	GENCODE	680	chr4	+	149067621	149130031		GGCCTTTCCAGTTTGTCCCATTATTACCTTAATTTCCAAAGAAATATTTCCTGTCACCAT		intronic antisense	NM_001166104	NR3C2	mineralocorticoid receptor isoform 2	-	148999914	149363672	206.081	65.1751	6.9844	5.55209
ASHGA5P017254	28.7466	28.7466	4.84532	up	noncoding	ENST00000439392	C21orf91-OT1	GENCODE	497	chr21	-	19149720	19164826		TATCCCATATCCAGTGAGTACAACAGCATGAAGTCTTGCTACCTTGCCAGATGCTATCAC	246312	exon sense-overlapping	NM_001100420	C21orf91	protein EURL homolog isoform 1	-	19161283	19191703	240.704	5	7.16657	2.32125
ASHGA5P017254	28.7466	28.7466	4.84532	up	noncoding	ENST00000439392	C21orf91-OT1	GENCODE	497	chr21	-	19149720	19164826		TATCCCATATCCAGTGAGTACAACAGCATGAAGTCTTGCTACCTTGCCAGATGCTATCAC	246312	exon sense-overlapping	NM_001100421	C21orf91	protein EURL homolog isoform 3	-	19161283	19191703	240.704	5	7.16657	2.32125
ASHGA5P017254	28.7466	28.7466	4.84532	up	noncoding	ENST00000439392	C21orf91-OT1	GENCODE	497	chr21	-	19149720	19164826		TATCCCATATCCAGTGAGTACAACAGCATGAAGTCTTGCTACCTTGCCAGATGCTATCAC	246312	exon sense-overlapping	NM_017447	C21orf91	protein EURL homolog isoform 2	-	19161283	19191703	240.704	5	7.16657	2.32125
ASHGA5P056191	2.82392	2.82392	1.4977	up	noncoding	TCONS_00000878	XLOC_000116	LincRNAs identified by Cabili et al	303	chr1	+	30464331	30465136		ATTGAAGAAGGTTCAAGACCACTCACACTTGGGCACTGATGGGCCTCTATGGGGTCATGG		intergenic							183.126	56.7323	6.83627	5.33857
ASHGA5P026799	4.38196	4.38196	2.13158	up	noncoding	ENST00000539685	AP000462.1	GENCODE	384	chr11	+	115267537	115268295	ENST00000540545, ENST00000543182	ATGTATCAAGATGTAGAATAGTACAGCTAAGCACAAGGCTCCTCCCCAGTCAAAGAGGAG		intronic antisense	NM_001098517	CADM1	cell adhesion molecule 1 isoform 2 precursor	-	115044344	115375241	1226.8	158.138	9.096	6.96443
ASHGA5P026799	4.38196	4.38196	2.13158	up	noncoding	ENST00000539685	AP000462.1	GENCODE	384	chr11	+	115267537	115268295	ENST00000540545, ENST00000543182	ATGTATCAAGATGTAGAATAGTACAGCTAAGCACAAGGCTCCTCCCCAGTCAAAGAGGAG		intronic antisense	NM_014333	CADM1	cell adhesion molecule 1 isoform 1 precursor	-	115044344	115375241	1226.8	158.138	9.096	6.96443
ASHGA5P055019	15.6789	15.6789	3.97075	up	noncoding	ENST00000466677	RP4-555L14.5	GENCODE	544	chr7	+	151106356	151109187		GCTGACCTTACCTACTTCCTCTTTCCAGGTTGATAGATTTTTTGTTCTTGGCTTCTCCAC		intronic antisense	NM_198285	WDR86	WD repeat-containing protein 86	-	151078206	151107124	8793.04	279.935	11.8549	7.88411
ASHGA5P034590	2695.78	2695.78	11.3965	up	noncoding	ENST00000452073	AC092295.5	GENCODE	395	chr19	+	37025675	37038666		AGCATTCAAAGTGTTTCTCACCATCATGAACTCTTTGAAGTGGAGTAACTTTTCCAACTC		natural antisense	NM_001145649	ZNF529	zinc finger protein 529 isoform a	-	37034516	37096178	25780.2	5	13.7177	2.32125
ASHGA5P034590	2695.78	2695.78	11.3965	up	noncoding	ENST00000452073	AC092295.5	GENCODE	395	chr19	+	37025675	37038666		AGCATTCAAAGTGTTTCTCACCATCATGAACTCTTTGAAGTGGAGTAACTTTTCCAACTC		natural antisense	NM_001145650	ZNF529	zinc finger protein 529 isoform b	-	37034516	37096178	25780.2	5	13.7177	2.32125
ASHGA5P034590	2695.78	2695.78	11.3965	up	noncoding	ENST00000452073	AC092295.5	GENCODE	395	chr19	+	37025675	37038666		AGCATTCAAAGTGTTTCTCACCATCATGAACTCTTTGAAGTGGAGTAACTTTTCCAACTC		natural antisense	NM_020951	ZNF529	zinc finger protein 529 isoform a	-	37034516	37064197	25780.2	5	13.7177	2.32125
ASHGA5P039287	118.118	118.118	6.88409	up	noncoding	ENST00000454037	AC139887.4	GENCODE	286	chr4	-	758274	758862		GAGGTTTGATTAGCAGCGGAGAGGTGCTCAACCCACACTGACATGGCCACCTTGATGCTG		natural antisense	NM_006315	PCGF3	polycomb group RING finger protein 3	+	699572	764427	2118.04	11.2386	9.81761	2.93353
ASHGA5P048487	5.56575	5.56575	2.47658	up	noncoding	ENST00000582695	RP11-110I1.12	GENCODE	553	chr11	-	118865533	118867314		TTGTGTCAAATGGAACTCAACATCTTCCCTTTTACTAAACCCCACCCAACATTCACTGCG		intergenic							7119.61	578.368	11.5244	9.04779
ASHGA5P025690	182.383	182.383	7.51083	up	noncoding	NR_026985	LOC339524	RefSeq	3429	chr1	+	87597608	87602352		AGTTCTGAAACACCAGATACTGCTACACCATCTCATCGGCATGGACCTATATGTGGCAGC	339524	exon sense-overlapping	ENST00000356813	HS2ST1	heparan sulfate 2-O-sulfotransferase 1 [Source:HGNC Symbol;Acc:5193]	+	87458764	87602334	13580.8	47.8313	12.5882	5.07738
ASHGA5P025690	182.383	182.383	7.51083	up	noncoding	NR_026985	LOC339524	RefSeq	3429	chr1	+	87597608	87602352		AGTTCTGAAACACCAGATACTGCTACACCATCTCATCGGCATGGACCTATATGTGGCAGC	339524	exon sense-overlapping	ENST00000370548	HS2ST1	heparan sulfate 2-O-sulfotransferase 1 [Source:HGNC Symbol;Acc:5193]	+	87458691	87634887	13580.8	47.8313	12.5882	5.07738
ASHGA5P045060	3.504	3.504	1.809	up	noncoding	ENST00000521793	RP11-489O18.1	GENCODE	596	chr8	+	139075510	139085483		AGATGACAACTTTTTGATGTAGGGACTATTTTGGCGTGTCCCACACACAGCATCAAGGGA		intergenic							20.8709	5	4.13026	2.32125
ASHGA5P032687	3.1282	3.1282	1.64533	up	noncoding	uc002jyo.1	AX746631	UCSC_knowngene	2143	chr17	-	78437250	78439393		CCTCCTACTGGATTTTTAAATAAATGTTTCCAACAGTTTGACCCTTAAAACCTGGAAATC		intergenic							86.5241	28.8409	5.94997	4.30463
ASHGA5P044971	49.7975	49.7975	5.638	up	noncoding	ENST00000521904	RP11-1101K5.1	GENCODE	477	chr8	+	112388867	112482846		CTAAACTAACTACAAGCTCCTCCACATTATCAGGACAAACACAATTCTAACTCTCAAAAG		intergenic							4077.96	48.1195	10.7265	5.08854
ASHGA5P044735	58.54	58.54	5.87135	up	noncoding	ENST00000560714	CTD-2647L4.5	GENCODE	585	chr8	+	28924795	28925971		ATATGTGAACTCTTCGCATTTACACGAATCCACACATAGAGAAGCTGTTCCAAGACCCCC		natural antisense	NM_015254	KIF13B	kinesin-like protein KIF13B	-	28924794	29120610	895.766	10.7127	8.73893	2.86758
ASHGA5P056806	7.75125	7.75125	2.95443	up	noncoding	TCONS_00008846	XLOC_003616	LincRNAs identified by Cabili et al	466	chr4	+	99884747	99885532		TTGAAGTTAGAATTGAATCCAAGAGGAAGAGAAGCATCCTTCCTTCAGTGCCTTTGTGGT		intergenic							60.9115	8.61505	5.53148	2.57706
ASHGA5P033420	5.9307	5.9307	2.5682	up	noncoding	ENST00000443207	RP4-580N22.2	GENCODE	190	chr1	-	236121178	236135125		CCCAAAAGAAGCTATGCTCGGGCCTTCCCATCGTCCCACTCAAGAGCTTTCTTCATATTG		intergenic							2663.68	224.475	10.0949	7.52671
ASHGA5P000519	2.6376	2.6376	1.39923	up	noncoding	chr8:140577700-140593825-	chr8:140577700-140593825	LincRNAs identified by Khalil et al	16125	chr8	-	140508518	140524643		GCATCTAACACTTGGGGAGTCCACTCAGATCCACTAACCAGGTTATTCTTACAACTGCTA		intergenic							15.5303	5	3.72048	2.32125
ASHGA5P023739	2.14425	2.14425	1.10047	up	noncoding	HMlincRNA1636-	HMlincRNA1636	LincRNAs identified by Khalil et al	8519	chrX	-	68199500	68208019		TCTACGTGATCTGTGCCCTGAAGTCTCTGGGTTGACTTTTGTCTGTTTGGATTTTCCTCA		intergenic							15.4293	8.88639	3.71071	2.61024
ASHGA5P033438	58.0863	58.0863	5.86013	up	noncoding	ENST00000582774	RP11-1376P16.1	GENCODE	345	chr17	+	80117931	80118328		ATGTGGAAGTTCCCTTGTTATGTCGCCTCACAAGGAATAAAAGCAACAGGATGAGGACAG		intronic antisense	NM_198082	CCDC57	coiled-coil domain-containing protein 57	-	80059345	80170689	677.525	8.44756	8.4165	2.55637
ASHGA5P042898	185.604	185.604	7.53609	up	noncoding	ENST00000434951	AC079742.4	GENCODE	357	chr7	-	6618195	6628605		TTTCTTCCTCTCATGACATGGAAAGGCAGGTAGAAAGATCTCTTGAAGGTTGCTCCGAAG		natural antisense	NM_001134387	ZDHHC4	probable palmitoyltransferase ZDHHC4	+	6617064	6628610	2187.39	5	9.85734	2.32125
ASHGA5P042898	185.604	185.604	7.53609	up	noncoding	ENST00000434951	AC079742.4	GENCODE	357	chr7	-	6618195	6628605		TTTCTTCCTCTCATGACATGGAAAGGCAGGTAGAAAGATCTCTTGAAGGTTGCTCCGAAG		natural antisense	NM_001134388	ZDHHC4	probable palmitoyltransferase ZDHHC4	+	6617064	6628610	2187.39	5	9.85734	2.32125
ASHGA5P042898	185.604	185.604	7.53609	up	noncoding	ENST00000434951	AC079742.4	GENCODE	357	chr7	-	6618195	6628605		TTTCTTCCTCTCATGACATGGAAAGGCAGGTAGAAAGATCTCTTGAAGGTTGCTCCGAAG		natural antisense	NM_001134389	ZDHHC4	probable palmitoyltransferase ZDHHC4	+	6617064	6628610	2187.39	5	9.85734	2.32125
ASHGA5P042898	185.604	185.604	7.53609	up	noncoding	ENST00000434951	AC079742.4	GENCODE	357	chr7	-	6618195	6628605		TTTCTTCCTCTCATGACATGGAAAGGCAGGTAGAAAGATCTCTTGAAGGTTGCTCCGAAG		natural antisense	NM_018106	ZDHHC4	probable palmitoyltransferase ZDHHC4	+	6617064	6628610	2187.39	5	9.85734	2.32125
ASHGA5P036311	3.54598	3.54598	1.82618	up	noncoding	ENST00000447478	RP4-534N18.2	GENCODE	517	chr1	+	32398620	32399576		CTCTACCATCACCCTATTCGATAAACATAACTAAGTCCACCATGTTAAAACTATGGATCC		intronic antisense	NM_080391	PTP4A2	protein tyrosine phosphatase type IVA 2 isoform 1	-	32372021	32403988	38385.2	5925.03	14.4407	12.6145
ASHGA5P036117	5.74669	5.74669	2.52273	up	noncoding	ENST00000437837	AC012363.13	GENCODE	555	chr2	+	121076582	121083874		TTGTCTACACCTGGAGCAGTCACAGACTTCAACATATCTTTAAGTGTGGTGCCACCAGTA		intergenic							35.6885	5	4.84398	2.32125
ASHGA5P020720	4.51015	4.51015	2.17317	up	noncoding	ENST00000518943	RP11-16M8.2	GENCODE	569	chr8	-	57432945	57472352		TAAGTACCAGCTGGGTAACTTCAGGCCCTGGAGGTCCATGCTTCTGCCCAAGCTGTGTCT		intergenic							27.5443	5	4.49443	2.32125
ASHGA5P021660	3.17659	3.17659	1.66748	up	noncoding	ENST00000537525	RP11-283G6.5	GENCODE	494	chr12	-	26383781	26424755	ENST00000541940	ATCCCTTCAGAAGAAAGAATCTTCAGGCCTCTGCTCTTGTGAGAGTAATTTCTCTTAACA		natural antisense	NM_001135823	SSPN	sarcospan isoform 2	+	26348268	26387708	44.2696	16.1973	5.11683	3.44935
ASHGA5P021660	3.17659	3.17659	1.66748	up	noncoding	ENST00000537525	RP11-283G6.5	GENCODE	494	chr12	-	26383781	26424755	ENST00000541940	ATCCCTTCAGAAGAAAGAATCTTCAGGCCTCTGCTCTTGTGAGAGTAATTTCTCTTAACA		natural antisense	NM_005086	SSPN	sarcospan isoform 1	+	26348505	26387708	44.2696	16.1973	5.11683	3.44935
ASHGA5P015749	45.9312	45.9312	5.5214	up	noncoding	ENST00000423171	RP11-151D14.1	GENCODE	594	chr9	-	75486643	75488984	ENST00000449235, ENST00000453787	AGCTCCTGTTCCTGCTGGAATGAGTCTCCATTCCTTGCAACAGAAGTGTCCTAAGTTATA		intergenic							9424.13	114.921	11.9744	6.45301
ASHGA5P025885	66.4932	66.4932	6.05513	up	noncoding	NR_045663	MYPN	RefSeq	5667	chr10	+	69869189	69971773		CACCATCCATGAGTACAAAATTTCAAGCTTTGAGCAGAGGCTGATGAATGAAATAGAGTT	84665	exon sense-overlapping	NM_001256267	MYPN	myopalladin isoform a	+	69865873	69971773	656.244	5	8.37639	2.32125
ASHGA5P025885	66.4932	66.4932	6.05513	up	noncoding	NR_045663	MYPN	RefSeq	5667	chr10	+	69869189	69971773		CACCATCCATGAGTACAAAATTTCAAGCTTTGAGCAGAGGCTGATGAATGAAATAGAGTT	84665	exon sense-overlapping	NM_001256268	MYPN	myopalladin isoform b	+	69869189	69971773	656.244	5	8.37639	2.32125
ASHGA5P025885	66.4932	66.4932	6.05513	up	noncoding	NR_045663	MYPN	RefSeq	5667	chr10	+	69869189	69971773		CACCATCCATGAGTACAAAATTTCAAGCTTTGAGCAGAGGCTGATGAATGAAATAGAGTT	84665	exon sense-overlapping	NM_032578	MYPN	myopalladin isoform a	+	69869189	69971773	656.244	5	8.37639	2.32125
ASHGA5P057398	48.1913	48.1913	5.5907	up	noncoding	TCONS_00016752	XLOC_007667	LincRNAs identified by Cabili et al	1199	chr9	-	33167636	33172203		AAACTGCGAGAAATTGTTGCTTCAAAACACCCACCAAGGCCCACTGGCCAGAACGCCGCC		intergenic							926.18	13.4399	8.77693	3.18623
ASHGA5P055947	3.68784	3.68784	1.88278	up	noncoding	TCONS_00028307	XLOC_013643	LincRNAs identified by Cabili et al	955	chr20	-	5466187	5469819		TTTATCCACATTCACAGGAATCCAGCCATCATCTGAGGAAGCAGTTCATGTCGCAGCAAA		intergenic							12095.1	1465.99	12.383	10.5002
ASHGA5P023631	12.8618	12.8618	3.68502	up	noncoding	HMlincRNA1179-	HMlincRNA1179	LincRNAs identified by Khalil et al	5414	chr7	-	152737017	152742431		TAACTCTGGATGGACAGAAAACACATTAGTCATTTCCCAGCTCCATTCCAAAGCCTAGCT		intergenic							11141.2	428.1	12.2399	8.55491
ASHGA5P022048	3.93056	3.93056	1.97474	up	noncoding	NR_037717	RNASEK-C17ORF49	RefSeq	1909	chr17	+	6915735	6920843	NM_001004333, NR_037716	GAGTGATCATATAATGCTCGGAATATTTTTCAATGTCCATTCCGCTGTGTTGATTGAGGA	100529209	exon sense-overlapping	NM_001004333	RNASEK	ribonuclease kappa	+	6915735	6917852	3564.02	428.342	10.5304	8.55565
ASHGA5P022048	3.93056	3.93056	1.97474	up	noncoding	NR_037717	RNASEK-C17ORF49	RefSeq	1909	chr17	+	6915735	6920843	NM_001004333, NR_037716	GAGTGATCATATAATGCTCGGAATATTTTTCAATGTCCATTCCGCTGTGTTGATTGAGGA	100529209	exon sense-overlapping	NM_001142798	C17orf49	chromatin complexes subunit BAP18 isoform 1	+	6918055	6920843	3564.02	428.342	10.5304	8.55565
ASHGA5P022048	3.93056	3.93056	1.97474	up	noncoding	NR_037717	RNASEK-C17ORF49	RefSeq	1909	chr17	+	6915735	6920843	NM_001004333, NR_037716	GAGTGATCATATAATGCTCGGAATATTTTTCAATGTCCATTCCGCTGTGTTGATTGAGGA	100529209	exon sense-overlapping	NM_001142799	C17orf49	chromatin complexes subunit BAP18 isoform 3	+	6918055	6920843	3564.02	428.342	10.5304	8.55565
ASHGA5P022048	3.93056	3.93056	1.97474	up	noncoding	NR_037717	RNASEK-C17ORF49	RefSeq	1909	chr17	+	6915735	6920843	NM_001004333, NR_037716	GAGTGATCATATAATGCTCGGAATATTTTTCAATGTCCATTCCGCTGTGTTGATTGAGGA	100529209	exon sense-overlapping	NM_174893	C17orf49	chromatin complexes subunit BAP18 isoform 2	+	6918055	6920843	3564.02	428.342	10.5304	8.55565
ASHGA5P027713	2.92746	2.92746	1.54965	up	noncoding	ENST00000538731	RP13-977J11.2	GENCODE	1477	chr12	-	132671286	132674240		CTTGTTCTTTCCTGTGCCCCACAGTCATTTTAAAATTAAATTAAATGGCTTATCTGCACT		intergenic							461.416	110.246	7.94085	6.3912
ASHGA5P014953	42.6236	42.6236	5.41358	up	noncoding	ENST00000415147	AP000688.14	GENCODE	159	chr21	-	37447178	37447900		ATCTTACAGACACCATGTACCTATCACCTGGTATAAGAAAGAAATCCTTAGCAATAAAGA		intron sense-overlapping	ENST00000399201	SETD4	SET domain containing 4 [Source:HGNC Symbol;Acc:1258]	-	37415983	37451687	449.927	7.61337	7.91079	2.49721
ASHGA5P056032	26.2991	26.2991	4.71694	up	noncoding	TCONS_00026279	XLOC_012626	LincRNAs identified by Cabili et al	1743	chr18	+	11489031	11490912		ATGATGTCACAAAGAGAAGTGAGAAATAATGCAAGCAGCTCCATTCCCCACGGCAACTGT		intergenic							3488.86	75.5132	10.4993	5.78234
ASHGA5P036659	6.4294	6.4294	2.68468	up	noncoding	ENST00000456265	RP5-1069C8.2	GENCODE	3033	chr20	-	12845849	12933167		GTCCAAAGGCTTTCTCTCACCCTTTTATATTTCACAGTTTTTACCTCAATAAATCCCTGA		intergenic							1086.56	102.62	8.95466	6.26997
ASHGA5P018111	5.68783	5.68783	2.50788	up	noncoding	ENST00000449537	AC004540.5	GENCODE	727	chr7	+	26438232	26439183		TCACGCCGCGAGAAACCCAACACACAGCTATTCTGTCAGGCTGCCGAGAAAAGGCTGTTC		intergenic							59.6938	11.7021	5.49879	2.99092
ASHGA5P022400	11.9769	11.9769	3.58219	up	noncoding	ENST00000556120	DIO3OS	GENCODE	2473	chr14	-	102018559	102022013		CCTGCAAGAGGGTTGCACATGGCAGAAACTTAATCCACACCAACTTCAGCGAAGAAGGAA		intergenic							83.235	5	5.90344	2.32125
ASHGA5P027792	8.22057	8.22057	3.03924	up	noncoding	ENST00000545775	ABC12-49244600F4.3	GENCODE	332	chr12	+	7271601	7274444	NR_026947	CTGACTTAGAGAGCACAGTTATTCCATCCATATGGAAATAAACATTTTGGATTCCTGATC		intergenic							61.0068	7.57059	5.53312	2.49388
ASHGA5P055924	14.9084	14.9084	3.89805	up	noncoding	ENST00000554382	RP11-388E23.2	GENCODE	545	chr14	-	24198361	24198906		TCTTAGCAGATCTTCCATTCCTAATCCAGGATCATTTCCAGGGCTCCCAGGTGAGAAAAT		intergenic							9852.63	329.154	12.033	8.13493
ASHGA5P033097	5.29709	5.29709	2.4052	up	noncoding	ENST00000579136	RP5-1110E20.1	GENCODE	258	chr17	+	39007051	39019534		CAAACCATCCTCTTTGCTTCCTTTGTGATGGACACTCCTTAGCTTCTGCGCCTTAATAAG		natural antisense	NM_000223	KRT12	keratin, type I cytoskeletal 12	-	39017429	39023462	162.501	28.6582	6.69659	4.29139
ASHGA5P028285	4.04409	4.04409	2.01582	up	noncoding	ENST00000551125	RP1-267L14.3	GENCODE	596	chr12	+	112501712	112503559		TAAAACAAAATCCTACTCATCCTGCAGTTTAACATCTGTAATGAATTTGCTTCAATTTAC		intronic antisense	NM_024953	NAA25	N-alpha-acetyltransferase 25, NatB auxiliary subunit	-	112464492	112546635	24.573	5	4.33707	2.32125
ASHGA5P028837	19.2354	19.2354	4.26569	up	noncoding	ENST00000418237	RP11-78J21.4	GENCODE	673	chr13	+	53063127	53073279	ENST00000422308, NR_002793	GGATGAAGTTAGATCTCTTCCTCACATCATACAGAAAAATCAACCTCAAATGGAAGAAAT		intergenic							186.824	8.80684	6.86635	2.60066
ASHGA5P028976	2.71073	2.71073	1.43868	up	noncoding	uc001vvr.1	AK022914	UCSC_knowngene	4651	chr14	-	19880208	19925333	ENST00000447898, uc010ahe.1	AAGAAAAACTACTTGCTGCCCTTACTTGAAGCTCAATTATTTAAAACAAAGAAAAAATAG		intergenic							16.9147	6.47369	3.84167	2.40299
ASHGA5P027338	3.30346	3.30346	1.72398	up	noncoding	NR_026723	SARNP	RefSeq	1195	chr12	-	56146246	56211540	NR_026722	ATATGTTCAGAGGGGCACTGGCCAGGTCCACACACATCATAAGGTGGGAGGGGGTGCTAA	84324	exon sense-overlapping	NM_033082	SARNP	SAP domain-containing ribonucleoprotein	-	56151053	56211540	38670.3	6411.22	14.4565	12.7325
ASHGA5P027338	3.30346	3.30346	1.72398	up	noncoding	NR_026723	SARNP	RefSeq	1195	chr12	-	56146246	56211540	NR_026722	ATATGTTCAGAGGGGCACTGGCCAGGTCCACACACATCATAAGGTGGGAGGGGGTGCTAA	84324	natural antisense	NM_005811	GDF11	growth/differentiation factor 11 precursor	+	56137063	56146665	38670.3	6411.22	14.4565	12.7325
ASHGA5P019836	298.408	298.408	8.22114	up	noncoding	ENST00000503882	CTC-436P18.3	GENCODE	640	chr5	-	60546383	60560756		CAAAAAGCTGGACATCATTCACCACTGGGAACAGCATATTGTTCCTGGAAGAGGCAAAAG		intergenic							3770.23	6.33321	10.6113	2.39013
ASHGA5P047008	14.5338	14.5338	3.86135	up	noncoding	AV660546		LincRNAs identified by Khalil et al	404	chr19	+	12885348	12889223		GGCCTCGGATGCTCGTCCATATCCCCACAACCTCCTCCCGCGTGGTTTTCCAGACTCCAG		intronic antisense	ENST00000264827	HOOK2	hook homolog 2 (Drosophila) [Source:HGNC Symbol;Acc:19885]	-	12873816	12886434	56334.3	2531.5	15.2125	11.3512
ASHGA5P047008	14.5338	14.5338	3.86135	up	noncoding	AV660546		LincRNAs identified by Khalil et al	404	chr19	+	12885348	12889223		GGCCTCGGATGCTCGTCCATATCCCCACAACCTCCTCCCGCGTGGTTTTCCAGACTCCAG		intronic antisense	ENST00000397668	HOOK2	hook homolog 2 (Drosophila) [Source:HGNC Symbol;Acc:19885]	-	12873816	12886434	56334.3	2531.5	15.2125	11.3512
ASHGA5P047008	14.5338	14.5338	3.86135	up	noncoding	AV660546		LincRNAs identified by Khalil et al	404	chr19	+	12885348	12889223		GGCCTCGGATGCTCGTCCATATCCCCACAACCTCCTCCCGCGTGGTTTTCCAGACTCCAG		intronic antisense	NM_001100176	HOOK2	protein Hook homolog 2 isoform 2	-	12873816	12886434	56334.3	2531.5	15.2125	11.3512
ASHGA5P047008	14.5338	14.5338	3.86135	up	noncoding	AV660546		LincRNAs identified by Khalil et al	404	chr19	+	12885348	12889223		GGCCTCGGATGCTCGTCCATATCCCCACAACCTCCTCCCGCGTGGTTTTCCAGACTCCAG		intronic antisense	NM_013312	HOOK2	protein Hook homolog 2 isoform 1	-	12873816	12886434	56334.3	2531.5	15.2125	11.3512
ASHGA5P027917	9.62296	9.62296	3.26648	up	noncoding	ENST00000549660	RP11-267D19.1	GENCODE	320	chr12	+	33141696	33146688		GGTGACATGTTTATGACTAACTCACTTCAGACTTACTCATTTAGTATTGGCACTATTTCA		intergenic							63.6769	5	5.58773	2.32125
ASHGA5P058302	22.9765	22.9765	4.52209	up	noncoding	TCONS_00029725	XLOC_014400	LincRNAs identified by Cabili et al	753	chr22	-	46032113	46033125		TATTCATTCAAGCAAATGAGGGTGTCCTCGGCGGCAAAATTCACCAGACTCAGAAAACTG		intergenic							191.829	6.1312	6.90287	2.38078
ASHGA5P023419	6.34627	6.34627	2.66591	up	noncoding	NR_047532	CDKN2B-AS1	RefSeq	2646	chr9	+	21994789	22121093		AGGCCCACACCTATTGCTATATTGAGAAACCACAGAAAGAGAGAAGTTAAATAATTTTCC	100048912	intronic antisense	NM_004936	CDKN2B	cyclin-dependent kinase 4 inhibitor B isoform 1	-	22002901	22009312	40.0341	5	4.98716	2.32125
ASHGA5P023419	6.34627	6.34627	2.66591	up	noncoding	NR_047532	CDKN2B-AS1	RefSeq	2646	chr9	+	21994789	22121093		AGGCCCACACCTATTGCTATATTGAGAAACCACAGAAAGAGAGAAGTTAAATAATTTTCC	100048912	intronic antisense	NM_078487	CDKN2B	cyclin-dependent kinase 4 inhibitor B isoform 2	-	22002901	22009312	40.0341	5	4.98716	2.32125
ASHGA5P026261	36.0917	36.0917	5.1736	up	noncoding	uc001mqu.1	BC045791	UCSC_knowngene	1565	chr11	+	26524764	26526329		CTTGAGGTTAACCCTATCTGAATACATAGAACTATGCGTATTCTCTTCCTTTCTTCCTTC		intron sense-overlapping	NM_031418	ANO3	anoctamin-3	+	26353677	26684836	317.012	5	7.49485	2.32125
ASHGA5P057893	140.761	140.761	7.13711	up	noncoding	TCONS_00023350	XLOC_011212	LincRNAs identified by Cabili et al	261	chr15	+	36782441	36799342		ATTCACCACGGCAGCACATCACCTCCAGAGTGAAGAAAAGTTTCAAACATCAGGAAAAAA		intergenic							10389.8	45.257	12.1285	4.99144
ASHGA5P050529	2.73351	2.73351	1.45075	up	noncoding	ENST00000418990	AC005041.9	GENCODE	524	chr2	+	74612622	74618554		ATAAATGACGGTAAGTTTTCAAATCCCTGCCTCTGAAACAGCAGAGATCCTTATCTGTGT		intronic antisense	NM_001190836	DCTN1	dynactin subunit 1 isoform 5	-	74588280	74619214	17.4066	6.78909	3.88252	2.43177
ASHGA5P028194	9.02354	9.02354	3.17369	up	noncoding	TCONS_00010108	XLOC_004576	LincRNAs identified by Cabili et al	680	chr5	+	139529832	139531887		TTATGAATCAAGGCTCAGAGATGACACCATCCCTATCCATAGGCAGCTGAAGTGATGAGA		intergenic							1369.97	90.7724	9.24336	6.06967
ASHGA5P031556	3.44727	3.44727	1.78545	up	noncoding	ENST00000566734	RP11-1021N1.2	GENCODE	549	chr16	+	15506576	15507125		GATTTTGATGTTGCATTTGGCTACATTTAATCCACTTTCACCCATAAGGTTTAGCATCTA		intron sense-overlapping	ENST00000568766	RP11-1021N1.1	Uncharacterized protein [Source:UniProtKB/TrEMBL;Acc:H3BMD7]	+	15489610	15609205	20.5152	5	4.1067	2.32125
ASHGA5P035826	16.003	16.003	4.00027	up	noncoding	ENST00000439606	AC007254.3	GENCODE	565	chr2	+	40269489	40332562		GACCCAGACCCATTCTGATATTTTTACAAAATAAATCCAGTCTTTGGGTAAAGGTATAGT		intergenic							3944.14	131.137	10.6755	6.67521
ASHGA5P056684	4.32931	4.32931	2.11414	up	noncoding	TCONS_00007281	XLOC_003284	LincRNAs identified by Cabili et al	786	chr3	-	150452255	150455302	TCONS_00007280	ATTTGCAAAGTACACCAAGATCACAGCAGTTGCCATCCATTAGCCGCTGAGACAAGTGAT		intergenic							250.633	48.3685	7.21368	5.09955
ASHGA5P054268	5.90535	5.90535	2.56202	up	noncoding	TCONS_00013287	XLOC_005955	LincRNAs identified by Cabili et al	1258	chr7	+	389256	390969	TCONS_00013288, TCONS_00014042, TCONS_00014043	ACTCCACACAACGTCCAAAACTCACGCTCACACACATCAAAACACAACTTCGCACAACGT		intergenic							138405	17993.6	16.7115	14.1494
ASHGA5P045914	5.37709	5.37709	2.42682	up	noncoding	TCONS_00001707	XLOC_001072	LincRNAs identified by Cabili et al	299	chr1	-	162530262	162531146	ENST00000563991	CTTTACCAATTGCATAATCACCCACTGCCTCAAGTAACAACAGAAAAACTTAAACTTGGT		intergenic							669.506	85.2011	8.40225	5.97543
ASHGA5P042494	5.42366	5.42366	2.43927	up	noncoding	ENST00000456795	RP3-331H24.4	GENCODE	352	chr6	+	72038644	72039509		GCAGCCCTTTAAGTTGGGTTCACCTATCCCACCCTATTCCTGTATCTATTTTATTCTATA		intergenic							2116.73	203.645	9.81467	7.3754
ASHGA5P016945	15.2236	15.2236	3.92824	up	noncoding	ENST00000435921	ABC12-49244600F4.3	GENCODE	572	chr12	+	7260647	7264202		TGGAAGGAAACTCCAGGACAGACCTCCACTATGAGAAGCGCTAAAGAAAGTTCTTTAGGA		intronic antisense	NM_016546	C1RL	complement C1r subcomponent-like protein precursor	-	7247145	7261869	249.172	14.3795	7.20652	3.27828
ASHGA5P048362	4.33727	4.33727	2.11679	up	noncoding	ENST00000533329	RP11-113K21.4	GENCODE	436	chr11	-	82783443	82808238		CTCAACAAAAGACACCAACTCTCTCAACTGTACTGTTAACAGATCTAAATGATACTCCAA		intergenic							26.4218	5	4.43804	2.32125
ASHGA5P050953	10.8264	10.8264	3.43649	up	noncoding	uc002wyq.2	BPIFA4P	UCSC_knowngene	1220	chr20	+	31781410	31798268	ENST00000375465, ENST00000420169	TTCTTTACAGATTTGACTCAAGGACTCCTCAGGGCAGACTTTCTTCCCAGCCTGCAGACA	317716	intergenic							144.349	12.8388	6.55874	3.12225
ASHGA5P041955	2.68484	2.68484	1.42484	up	noncoding	TCONS_00020963	XLOC_010233	LincRNAs identified by Cabili et al	973	chr12	-	124688047	124691914		GCGCCCACCGTTTTTTGGAACGATGTTCAAAACCCATTCTACATTCTTGTGAAAAATCTG		intronic antisense	NM_001204299	ZNF664-FAM101A	protein FAM101A	+	124457761	124800570	26.1681	11.785	4.42461	2.99978
ASHGA5P023624	196.764	196.764	7.62032	up	noncoding	HMlincRNA1106+	HMlincRNA1106	LincRNAs identified by Khalil et al	7243	chr9	+	16334709	16341952		TACAGTCCATGCTAGGGGAACACCATCATATTTTGGCCTATCTACTATTGTTGGGCCTTT		intergenic							4262.43	13.3337	10.7955	3.17521
ASHGA5P049060	4.27575	4.27575	2.09618	up	noncoding	ENST00000572913	RP11-485G7.5	GENCODE	714	chr16	-	11435665	11439068		AAAGAACTTCCTCTTTCAACGCATCTCAAAATTTGGCGTGGATGCAGATCACCTACAGAG		intronic antisense	ENST00000381820	RMI2	RMI2, RecQ mediated genome instability 2, homolog (S. cerevisiae) [Source:HGNC Symbol;Acc:28349]	+	11410635	11445585	26.0574	5	4.41743	2.32125
ASHGA5P049060	4.27575	4.27575	2.09618	up	noncoding	ENST00000572913	RP11-485G7.5	GENCODE	714	chr16	-	11435665	11439068		AAAGAACTTCCTCTTTCAACGCATCTCAAAATTTGGCGTGGATGCAGATCACCTACAGAG		intronic antisense	ENST00000572173	RMI2	RMI2, RecQ mediated genome instability 2, homolog (S. cerevisiae) [Source:HGNC Symbol;Acc:28349]	+	11343505	11445612	26.0574	5	4.41743	2.32125
ASHGA5P056289	4.05864	4.05864	2.021	up	noncoding	TCONS_00001809	XLOC_001195	LincRNAs identified by Cabili et al	4431	chr1	-	212800581	212805924	TCONS_00001810, TCONS_00002580	AGTCAAAAAAATGCTTCCCAACCTTTTGCAGACCATGGCATACGCAGAAAATGACAACAT		intergenic							24.6718	5	4.34225	2.32125
ASHGA5P054645	10.4396	10.4396	3.384	up	noncoding	TCONS_00012660	XLOC_005621	LincRNAs identified by Cabili et al	501	chr6	-	15730383	15753135		TGCATTTAAGCCTCAGTCTTCTGCCTCCAAACCCCAGCTAAATGTTGCTGTATTCAACAT		intergenic							10174.4	470.28	12.0974	8.71345
ASHGA5P000564	7.67197	7.67197	2.9396	up	noncoding	chrX:20329325-20341425+	chrX:20329325-20341425	LincRNAs identified by Khalil et al	12100	chrX	+	20419404	20431504		GTAGTGGTCCTTCTAAATTCGGGCCACTCGACTCATTCCTTCCTGTCTCATTTTGTTCTT		intergenic							830.368	72.3012	8.65715	5.71755
ASHGA5P037061	16.9961	16.9961	4.08713	up	noncoding	TCONS_00025656	XLOC_012482	LincRNAs identified by Cabili et al	691	chr17	-	41754164	41768355		AGAAATCACCACTGGCTATTGTGACCTCCAAAGGCACTTGTCACTACACAGTGACACAAA		intergenic							129.142	5.22653	6.42184	2.33471
ASHGA5P057573	42.8849	42.8849	5.4224	up	noncoding	TCONS_00019285	XLOC_009118	LincRNAs identified by Cabili et al	434	chr11	+	45029831	45063247		CAGCAAACAGAAAAATAAGTCAATGCAGAGCTTCCAACACCATCAGCTCACTGTGGTTCT		intergenic							5413.05	72.0499	11.1359	5.7135
ASHGA5P053131	5.41787	5.41787	2.43773	up	noncoding	uc010lch.3	BC110795	UCSC_knowngene	1970	chr7	+	74698156	74704119	NR_003666, uc010lba.3, uc010lcn.3, uc010lco.3	TTCTCACACTGACATCTGCTCTCTAATCACAGAGGATCCTGTCATTAAAAGACTCCTGGC		intergenic							5460.96	469.128	11.1461	8.70837
ASHGA5P046603	404.443	404.443	8.65979	up	noncoding	ENST00000568809	RP11-524D16__A.3	GENCODE	652	chrX	+	99928326	99928978		ACACACATACCATTCTCACAGGAGGCCACATGGTGCAGTAGAGTCAGACTTTGATTCAAA		intergenic							38356.8	75.2943	14.4375	5.77775
ASHGA5P016717	3.04971	3.04971	1.60867	up	noncoding	ENST00000433324	AC097662.2	GENCODE	241	chr2	-	228133460	228189917		AACGGCTCCACGTCCTGCAGACACATTCTGGGACTGCACCTTATGAGTGCTGCTCACTCT		intronic antisense	NM_000091	COL4A3	collagen alpha-3(IV) chain precursor	+	228029280	228179508	1011.82	189.096	8.87052	7.26185
ASHGA5P030900	40.2882	40.2882	5.33228	up	noncoding	ENST00000570515	LA16c-380H5.2	GENCODE	608	chr16	-	3053431	3055102		TTAGACAAGTCTATTTTCAGACTCGCTCCTTTCTCTACCAAACCTGAGCTGCTTCCGATT		intergenic							360.538	5	7.65354	2.32125
ASHGA5P055228	5.05808	5.05808	2.33859	up	noncoding	ENST00000531784	RP11-264E20.1	GENCODE	1159	chr11	-	128485759	128491701		TTCAGTGACACCATAGAGATTATTTTTCAGCTTGCTCCTCTGTGAGGATCAAATCTATTG		intergenic							34.5263	7.17147	4.80043	2.46184
ASHGA5P019453	259.978	259.978	8.02225	up	noncoding	NR_051967	MRPS2	RefSeq	1659	chr9	+	138392476	138396519		TTTTGGCGTCATGTTGGATGTCCACACATCCATATGGGGTTTATGGAGCCGTACATCTTT	51116	exon sense-overlapping	NM_016034	MRPS2	28S ribosomal protein S2, mitochondrial	+	138392476	138396519	11224	27.5019	12.2523	4.23003
ASHGA5P045410	8.56436	8.56436	3.09835	up	noncoding	NR_024376	FAM225B	RefSeq	5836	chr9	-	115867002	115873957	ENST00000434051, ENST00000439875, NR_024366	CACACCTCCAACATGTTTCTGTGTATATTATTGTGTGCATAGATACTACCATTGTGAAAT	100128385	intergenic							786.707	62.9214	8.59027	5.49192
ASHGA5P023338	7.67966	7.67966	2.94104	up	noncoding	ENST00000578803	RP11-111H3.2	GENCODE	2221	chr18	+	74331733	74335516		CCCGCCTTGCCCTGCACATGAATAACAGAGTACACCAGTCATCATAAGAAGAAAAATTCA		intergenic							1604.82	118.731	9.44371	6.50266
ASHGA5P047043	3.2633	3.2633	1.70633	up	noncoding	TCONS_00015110	XLOC_007167	LincRNAs identified by Cabili et al	303	chr8	-	98630164	98630871		AGCCAGCGCATTCTTAAATTGCTTTAGCCTGTCATCTCACCACTTGGGCATTCTTGATGA		intergenic							58.1771	19.9941	5.46425	3.75792
ASHGA5P046843	3.94992	3.94992	1.98182	up	noncoding	TCONS_00014648	XLOC_006737	LincRNAs identified by Cabili et al	983	chr8	+	21539898	21541011		ATCTTGCTGCCAGAAATCAATCACTCCATCAGTCATGTTGGTTGCCGAATGAGTAGTACC		intergenic							67.1252	18.7809	5.64685	3.66502
ASHGA5P044044	2.11742	2.11742	1.08231	up	noncoding	ENST00000449903	AC006372.5	GENCODE	546	chr7	+	157294015	157296271		TCCACATGAAAATATTTAGAGATCCAGCTCTTGGAAGCCAAGGAGAAACTGGCTTTTAAG		intergenic							45.5076	24.7696	5.15184	4.06953
ASHGA5P053420	2.19028	2.19028	1.13112	up	noncoding	ENST00000443799	GAS5	GENCODE	897	chr1	-	173834490	173837127	ENST00000421068, ENST00000456293	TGTAAATGCAGCCTGGATGATGATAAGCAAATGCTGACTGAACATGAAGGTCTTAATTAG	60674	bidirectional	NM_001122770	ZBTB37	zinc finger and BTB domain-containing protein 37 isoform a	+	173837492	173855774	42.6266	22.5678	5.06873	3.93761
ASHGA5P053420	2.19028	2.19028	1.13112	up	noncoding	ENST00000443799	GAS5	GENCODE	897	chr1	-	173834490	173837127	ENST00000421068, ENST00000456293	TGTAAATGCAGCCTGGATGATGATAAGCAAATGCTGACTGAACATGAAGGTCTTAATTAG	60674	bidirectional	NM_032522	ZBTB37	zinc finger and BTB domain-containing protein 37 isoform b	+	173837492	173842778	42.6266	22.5678	5.06873	3.93761
ASHGA5P057343	6.23563	6.23563	2.64054	up	noncoding	TCONS_00016167	XLOC_007577	LincRNAs identified by Cabili et al	266	chr9	+	130919331	130921865	TCONS_00016706	TACTGGAGTCCCAAGCTGGAGTCCAGCCTGATTCCCACCCACAGGTTGTAACCAATGAGC		intergenic							579.521	66.7726	8.2349	5.59437
ASHGA5P058933	2088.8	2088.8	11.0285	up	noncoding	uc.92+	uc.92	UCR	309	chr2	+	164450678	164450987		TAACCATCATCTAAAAAAGCTACCAAAATGCTTTAGCATTTAGTCTAGCAGTCATTTCCC		intronic antisense	ENST00000409634	FIGN	fidgetin [Source:HGNC Symbol;Acc:13285]	-	164449905	164592522	21015.8	5	13.3497	2.32125
ASHGA5P039232	2.8195	2.8195	1.49544	up	noncoding	ENST00000452657	RP11-655G22.1	GENCODE	490	chr3	+	191747668	191754031		AGTTGGATCACCTCTGTCCATTTCACTTTGCTGATATGAGGATATATTGAGAGAGAGAGA		intergenic							49.7415	20.1538	5.26694	3.7715
ASHGA5P056504	29.677	29.677	4.89127	up	noncoding	TCONS_00005049	XLOC_001924	LincRNAs identified by Cabili et al	575	chr2	+	243001270	243002921		CAAAAAACACATCCTCATCTGATTTCAAGACTTCCTCTAAAGCAATCGCATTTGGTACTG		intergenic							250.287	5	7.21253	2.32125
ASHGA5P038762	2.00861	2.00861	1.0062	up	noncoding	TCONS_00024207	XLOC_011590	LincRNAs identified by Cabili et al	237	chr15	-	95127106	95128051	TCONS_00023797	ATTTCTCATCCTGCTCCAAGTTAGCCAAGAGCATCTGTACAACCACTGGGAAGTCAACTT		intergenic							213.966	88.074	7.02968	6.02348
ASHGA5P042437	22.2636	22.2636	4.47661	up	noncoding	ENST00000438967	RP11-298J23.5	GENCODE	408	chr6	+	41688133	41701770		TACTTCCTGCAGCCGGTTCATCCACAATAGGTCACAAGATGGGCATCACCACCCAGGAGG		intronic antisense	NM_001167827	TFEB	transcription factor EB	-	41651715	41703997	6063.46	145.088	11.3004	6.82376
ASHGA5P042437	22.2636	22.2636	4.47661	up	noncoding	ENST00000438967	RP11-298J23.5	GENCODE	408	chr6	+	41688133	41701770		TACTTCCTGCAGCCGGTTCATCCACAATAGGTCACAAGATGGGCATCACCACCCAGGAGG		intronic antisense	NM_007162	TFEB	transcription factor EB	-	41651715	41702798	6063.46	145.088	11.3004	6.82376
ASHGA5P014570	25.9671	25.9671	4.69861	up	noncoding	ENST00000411451	RP11-308N19.4	GENCODE	690	chr9	+	109427030	109464943		AGCATCATCTGAAACATGCAGCCATCCAGCCCAGAACACAACAAGAATAGAGTTGATGAG		intergenic							18997.5	404.674	13.1602	8.4616
ASHGA5P037191	995.06	995.06	9.95864	up	noncoding	TCONS_00026160	XLOC_012574	LincRNAs identified by Cabili et al	245	chr17	-	72530813	72534060		TGTTCATCATCATCTTGTTTTAAGGGATTTGCCACATACATGCATATGGATTTCCAAAGG		intergenic							36898.4	30.7317	14.357	4.39836
ASHGA5P033186	2.94133	2.94133	1.55647	up	noncoding	ENST00000478824	CTD-2377D24.6	GENCODE	1436	chr17	+	46782564	46784708		TATAAAGTAAAAAGATCTTTCTCTCACACTGTCTCCACCTCTCCTGGTCTCACCGTTGTG		intergenic							5686.18	841.335	11.2103	9.65386
ASHGA5P016803	157.206	157.206	7.29651	up	noncoding	ENST00000434426	RP11-73B2.6	GENCODE	744	chr7	-	63385225	63386655		GGTTGCCATGATTAACTCTTAAGTACTCCACGCTTCTGAAACGGGCGTAGGCACAGCGTC		intergenic							1824.79	5	9.61776	2.32125
ASHGA5P017492	2.23245	2.23245	1.15863	up	noncoding	ENST00000442329	AC009948.3	GENCODE	529	chr2	+	179388220	179400579		TCATTTTAAGATGCAGAGTGTTCATATGAGGAGAGACTTTCCCTTGTCTCCGTCATCTGT		natural antisense	NM_001256850	TTN	titin isoform 1	-	179390716	179672150	68.6895	33.3924	5.6803	4.52167
ASHGA5P017492	2.23245	2.23245	1.15863	up	noncoding	ENST00000442329	AC009948.3	GENCODE	529	chr2	+	179388220	179400579		TCATTTTAAGATGCAGAGTGTTCATATGAGGAGAGACTTTCCCTTGTCTCCGTCATCTGT		natural antisense	NM_001267550	TTN	titin isoform IC	-	179390716	179672150	68.6895	33.3924	5.6803	4.52167
ASHGA5P017492	2.23245	2.23245	1.15863	up	noncoding	ENST00000442329	AC009948.3	GENCODE	529	chr2	+	179388220	179400579		TCATTTTAAGATGCAGAGTGTTCATATGAGGAGAGACTTTCCCTTGTCTCCGTCATCTGT		natural antisense	NM_003319	TTN	titin isoform N2-B	-	179390717	179672150	68.6895	33.3924	5.6803	4.52167
ASHGA5P017492	2.23245	2.23245	1.15863	up	noncoding	ENST00000442329	AC009948.3	GENCODE	529	chr2	+	179388220	179400579		TCATTTTAAGATGCAGAGTGTTCATATGAGGAGAGACTTTCCCTTGTCTCCGTCATCTGT		natural antisense	NM_133378	TTN	titin isoform N2-A	-	179390717	179672150	68.6895	33.3924	5.6803	4.52167
ASHGA5P017492	2.23245	2.23245	1.15863	up	noncoding	ENST00000442329	AC009948.3	GENCODE	529	chr2	+	179388220	179400579		TCATTTTAAGATGCAGAGTGTTCATATGAGGAGAGACTTTCCCTTGTCTCCGTCATCTGT		natural antisense	NM_133432	TTN	titin isoform novex-1	-	179390717	179672150	68.6895	33.3924	5.6803	4.52167
ASHGA5P017492	2.23245	2.23245	1.15863	up	noncoding	ENST00000442329	AC009948.3	GENCODE	529	chr2	+	179388220	179400579		TCATTTTAAGATGCAGAGTGTTCATATGAGGAGAGACTTTCCCTTGTCTCCGTCATCTGT		natural antisense	NM_133437	TTN	titin isoform novex-2	-	179390717	179672150	68.6895	33.3924	5.6803	4.52167
ASHGA5P033597	2.95713	2.95713	1.5642	up	noncoding	uc002lch.1	AK095045	UCSC_knowngene	2468	chr18	-	44247784	44250252		TCTGTCACTGTGTTTGAACGGCCCTCAATTTCTATCTAATAAAACCAGTCAAATGGTTCA		intergenic							63.4895	23.9397	5.58443	4.02023
ASHGA5P026635	10.1562	10.1562	3.34428	up	noncoding	ENST00000524441	RP11-632K5.2	GENCODE	639	chr11	+	74120104	74127424		CATCATACAGCACCCACAGGAACTTCAAGAGACTGGAGTTAATAAAGAGATTAAAGAGAT		intergenic							2278.75	123.365	9.9155	6.57121
ASHGA5P028945	71.3562	71.3562	6.15697	up	noncoding	ENST00000565936	RP11-315H15.3	GENCODE	6897	chr13	+	112967780	112976072		CAAGACAATCACCATCATAAAAGCCCACATCATTTACAGATCTTGGAACTTGAACTTTCT		intergenic							61131.2	642.339	15.3694	9.21243
ASHGA5P043235	37.7613	37.7613	5.23884	up	noncoding	ENST00000446022	RP13-530H6.2	GENCODE	456	chr7	-	100200536	100201829		TGTACCAGAGCAGGAAGCCTCGTCCTCCTGTGCCCTCATCCGTCGTCATCCTCAGGGTCA		natural antisense	NM_002593	PCOLCE	procollagen C-endopeptidase enhancer 1 precursor	+	100199881	100205798	27831.2	445.684	13.8632	8.6244
ASHGA5P033730	391.771	391.771	8.61387	up	noncoding	ENST00000584722	RP11-781P6.1	GENCODE	2295	chr18	+	6954675	6957418		TTTGTCTCTAGTTCCCAAGCGCTGCACAGTGACCTCCACGAAACACTGATTTCTTGTTTA		natural antisense	NM_005559	LAMA1	laminin subunit alpha-1 precursor	-	6941742	7117813	4687.65	5	10.9351	2.32125
ASHGA5P039560	2.36648	2.36648	1.24274	up	noncoding	ENST00000503597	RP11-55L3.1	GENCODE	138	chr4	-	117411231	117412356		AATGTCATTCCTGTTCTCCCCAGAATTGGTGAAATCAGCAACAGAACTATTCATTTCATT		intergenic							903.227	222.082	8.74891	7.50617
ASHGA5P026465	3.20527	3.20527	1.68044	up	noncoding	DA315543		LincRNAs identified by Khalil et al	538	chr6	-	27378044	27440219		TCCAGCTTAAGAGATCCAGTACTGGAGTCGGCAGAACTGGAGTAAAATCCTGGTCCCTGT		exon sense-overlapping	ENST00000211936	ZNF184	zinc finger protein 184 [Source:HGNC Symbol;Acc:12975]	-	27418521	27440897	20.5296	6.74344	4.1083	2.42786
ASHGA5P026465	3.20527	3.20527	1.68044	up	noncoding	DA315543		LincRNAs identified by Khalil et al	538	chr6	-	27378044	27440219		TCCAGCTTAAGAGATCCAGTACTGGAGTCGGCAGAACTGGAGTAAAATCCTGGTCCCTGT		exon sense-overlapping	ENST00000377419	ZNF184	zinc finger protein 184 [Source:HGNC Symbol;Acc:12975]	-	27418598	27440460	20.5296	6.74344	4.1083	2.42786
ASHGA5P026465	3.20527	3.20527	1.68044	up	noncoding	DA315543		LincRNAs identified by Khalil et al	538	chr6	-	27378044	27440219		TCCAGCTTAAGAGATCCAGTACTGGAGTCGGCAGAACTGGAGTAAAATCCTGGTCCCTGT		exon sense-overlapping	NM_007149	ZNF184	zinc finger protein 184	-	27418520	27440897	20.5296	6.74344	4.1083	2.42786
ASHGA5P035803	2.95005	2.95005	1.56074	up	noncoding	TCONS_00005098	XLOC_002010	LincRNAs identified by Cabili et al	459	chr2	-	20725916	20727696		TTCTCTTTCTCTCCAGGGCACTTGAGAGGCTGGACAGGGATAAACTGCTCTTCAATAATA		intergenic							226.431	64.3645	7.09328	5.53254
ASHGA5P019968	195.798	195.798	7.61322	up	noncoding	ENST00000506028	RP11-35J23.5	GENCODE	915	chr10	-	98133457	98135109		ACCATAGAATCATCACCAGAAGTAAGAGAGAAAATGCGCATAAATGCTTGGCATGGAATA		exon sense-overlapping	NM_012465	TLL2	tolloid-like protein 2 precursor	-	98124362	98273683	36740.4	136.612	14.3487	6.73543
ASHGA5P043634	166.181	166.181	7.37661	up	noncoding	ENST00000440213	AC005022.1	GENCODE	1220	chr7	+	41141201	41173105		GAAGGCAGCTATAGAATCATCATCATATGGAATTCTAGATACAGGCCTACAAAAATGTTT		intergenic							1930.37	5	9.69786	2.32125
ASHGA5P057136	2.47314	2.47314	1.30635	up	noncoding	TCONS_00013647	XLOC_006301	LincRNAs identified by Cabili et al	1518	chr7	+	154795566	154797375	TCONS_00013641	AGAGCCCGCGCTCGCCTCCCTTCCGCCAAGATTCACAGAACACGGCAGAGTGGCCTCGGG		intergenic							486.885	134.383	8.01836	6.71201
ASHGA5P030477	4.23138	4.23138	2.08113	up	noncoding	ENST00000558101	RP11-540O11.7	GENCODE	414	chr15	+	41303794	41305498		GCATTTCTTTCTCTCTTTGAAGAGGGTATACGATTTCAAGAGAAAAAGGAAAATCCTGAA		intronic antisense	NM_017553	INO80	DNA helicase INO80	-	41271078	41408340	40.5912	11.1588	5.005	2.92387
ASHGA5P021166	68.6394	68.6394	6.10097	up	noncoding	NR_038225	ZNF503-AS1	RefSeq	1636	chr10	+	77056140	77121436		TTAATCCTGCTCCTCTCAGGAAAAAGTGATTCAGCTCCGGTCCACCCTGGGTGCAGCGGT	253264	intergenic							3837.56	33.7016	10.6346	4.53368
ASHGA5P018699	2.55608	2.55608	1.35393	up	noncoding	ENST00000456582	RP4-639F20.1	GENCODE	401	chr1	+	95426880	95428826		ATGAAACGATTTTCTGCCATTTCAGTTCCTGTTATCGTGCTTTGAGGTGCACTGAACTGC		intergenic							15.061	5	3.67519	2.32125
ASHGA5P051791	131.948	131.948	7.04382	up	noncoding	ENST00000482559	RP11-4B14.3	GENCODE	530	chr3	-	181252402	181253669	ENST00000470817	CCTTCTAATCTCTGACTTGACATGCTCCCACACAAAAATGTAAGTGTAAATATGCAAATA		intergenic							4338.65	20.2267	10.8204	3.77656
ASHGA5P040561	21.1635	21.1635	4.40351	up	noncoding	ENST00000518436	RP11-61G23.1	GENCODE	375	chr5	-	89455805	89585798		GGTCATCCTGTTCTCACCTCCAATATTCATTATGATCTCTAACATCACTATATACAACAT		intergenic							10328.1	251.93	12.1149	7.71143
ASHGA5P019204	2.32757	2.32757	1.21883	up	noncoding	ENST00000472761	GLYCTK-AS1	GENCODE	109	chr3	-	52330672	52332930		TGAGGAGACAGCGCCACTGAGCTCCCCACTTCCACAGAGCTTTCCCGCACAGATCCACCT		intergenic							516.421	149.158	8.08888	6.87005
ASHGA5P022678	2.27546	2.27546	1.18616	up	noncoding	ENST00000560727	RP11-707P17.2	GENCODE	630	chr15	+	51750100	51752764		AGAAAAAAGGGTGACTGCCTTCCTTTCATCACGAAGGGCCATTCAAATTTTCTGCCCATG		natural antisense	NM_001174116	DMXL2	dmX-like protein 2 isoform 1	-	51739920	51914967	48.2682	24.3418	5.22939	4.04323
ASHGA5P022678	2.27546	2.27546	1.18616	up	noncoding	ENST00000560727	RP11-707P17.2	GENCODE	630	chr15	+	51750100	51752764		AGAAAAAAGGGTGACTGCCTTCCTTTCATCACGAAGGGCCATTCAAATTTTCTGCCCATG		natural antisense	NM_001174117	DMXL2	dmX-like protein 2 isoform 3	-	51739920	51914967	48.2682	24.3418	5.22939	4.04323
ASHGA5P022678	2.27546	2.27546	1.18616	up	noncoding	ENST00000560727	RP11-707P17.2	GENCODE	630	chr15	+	51750100	51752764		AGAAAAAAGGGTGACTGCCTTCCTTTCATCACGAAGGGCCATTCAAATTTTCTGCCCATG		natural antisense	NM_015263	DMXL2	dmX-like protein 2 isoform 2	-	51739920	51914967	48.2682	24.3418	5.22939	4.04323
ASHGA5P019538	3.42789	3.42789	1.77732	up	noncoding	uc003feg.3	BC073807	UCSC_knowngene	2274	chr3	+	162442526	162949936	ENST00000490357	AATTGCACCACACCTAAAGATATATTAACCAGACAACTTCTGTTTAGGAGGAAAATCAAG		intergenic							27336.3	4020.19	13.8269	12.0496
ASHGA5P018682	5.24275	5.24275	2.39032	up	noncoding	ENST00000456450	AC010907.2	GENCODE	693	chr2	-	3650986	3651832		GCCTTCCTCGGGCGTTACAACTTGGAAAACAAGACCAGGCGCAGTGGCTCACACCTGTAA		intronic antisense	NM_001255982	COLEC11	collectin-11 isoform c precursor	+	3642421	3692234	289.426	45.293	7.38238	4.99205
ASHGA5P018682	5.24275	5.24275	2.39032	up	noncoding	ENST00000456450	AC010907.2	GENCODE	693	chr2	-	3650986	3651832		GCCTTCCTCGGGCGTTACAACTTGGAAAACAAGACCAGGCGCAGTGGCTCACACCTGTAA		intronic antisense	NM_001255983	COLEC11	collectin-11 isoform d precursor	+	3642421	3692234	289.426	45.293	7.38238	4.99205
ASHGA5P018682	5.24275	5.24275	2.39032	up	noncoding	ENST00000456450	AC010907.2	GENCODE	693	chr2	-	3650986	3651832		GCCTTCCTCGGGCGTTACAACTTGGAAAACAAGACCAGGCGCAGTGGCTCACACCTGTAA		intronic antisense	NM_001255984	COLEC11	collectin-11 isoform e precursor	+	3642421	3692234	289.426	45.293	7.38238	4.99205
ASHGA5P018682	5.24275	5.24275	2.39032	up	noncoding	ENST00000456450	AC010907.2	GENCODE	693	chr2	-	3650986	3651832		GCCTTCCTCGGGCGTTACAACTTGGAAAACAAGACCAGGCGCAGTGGCTCACACCTGTAA		intronic antisense	NM_024027	COLEC11	collectin-11 isoform a precursor	+	3642421	3692234	289.426	45.293	7.38238	4.99205
ASHGA5P018682	5.24275	5.24275	2.39032	up	noncoding	ENST00000456450	AC010907.2	GENCODE	693	chr2	-	3650986	3651832		GCCTTCCTCGGGCGTTACAACTTGGAAAACAAGACCAGGCGCAGTGGCTCACACCTGTAA		intronic antisense	NM_199235	COLEC11	collectin-11 isoform b	+	3642421	3692234	289.426	45.293	7.38238	4.99205
ASHGA5P018682	5.24275	5.24275	2.39032	up	noncoding	ENST00000456450	AC010907.2	GENCODE	693	chr2	-	3650986	3651832		GCCTTCCTCGGGCGTTACAACTTGGAAAACAAGACCAGGCGCAGTGGCTCACACCTGTAA		natural antisense	NM_001255985	COLEC11	collectin-11 isoform f precursor	+	3649495	3692234	289.426	45.293	7.38238	4.99205
ASHGA5P019254	23.177	23.177	4.53462	up	noncoding	ENST00000475371	RP11-204J18.3	GENCODE	733	chr3	-	62249549	62304567		AGGCCGTCTGGTGCACCCACCACTAGAATTTGAACATCCTAAGAACAGGTATTTTTGTCT		natural antisense	NM_002841	PTPRG	receptor-type tyrosine-protein phosphatase gamma	+	61547242	62280573	496.444	16.8394	8.03684	3.50222
ASHGA5P044048	66.1837	66.1837	6.0484	up	noncoding	AW820382		LincRNAs identified by Khalil et al	184	chr17	-	13732146	13732301		ACAGAATTAAATTTAAAACAAATGTTTTCTCTTGCACACACCTCCATCCAACGTGGGACA		intergenic							17558.4	160.223	13.0361	6.98773
ASHGA5P021003	221.163	221.163	7.78897	up	noncoding	ENST00000523194	RP11-461C13.1	GENCODE	717	chr5	+	53616773	53710957		CTCAAAAACTGTTATAAAAGACATTGTGGCTACCATCTCTCATCACTCACTCAAAGGGAA		intergenic							28672.2	94.2703	13.9233	6.13436
ASHGA5P030515	5.17129	5.17129	2.37053	up	noncoding	ENST00000557965	RP11-96O20.2	GENCODE	431	chr15	+	45850795	45855075		TTTTATCTTTTTTTGCAGGGGGAAGGCAGAGTCTCATTCTGTCACCCAGGTTAGAGTGCA		intergenic							294.526	46.6855	7.40904	5.03851
ASHGA5P057504	3.99627	3.99627	1.99866	up	noncoding	TCONS_00018389	XLOC_008669	LincRNAs identified by Cabili et al	512	chr10	+	132102127	132102815		AAGGTTCCAGGTGATTCCAGCTCTTCATATAGCTGCTGCCTCACAGAATTAGGATGAGTA		intergenic							139.097	33.2486	6.51457	4.51592
ASHGA5P028716	2.66241	2.66241	1.41273	up	noncoding	uc001unz.1	AK093279	UCSC_knowngene	2100	chr13	+	21872311	21906571		CTGCTCACATCTGGTCTGTTCCCCAGTATCCTCACTGTATTAAAGTTGTTTCTTTGTCAT		intergenic							820.824	185.225	8.64103	7.2283
ASHGA5P056974	3.67493	3.67493	1.87772	up	noncoding	TCONS_00011704	XLOC_005183	LincRNAs identified by Cabili et al	587	chr6	+	14661559	14665451		AAGTCATGAGACCTGTTTCTCCAGGTTTCCCGCCTCCTTCCACCTTCTGTACAGGACACA		intergenic							15622.1	2007.08	12.8533	10.9756
ASHGA5P027905	7.90201	7.90201	2.98222	up	noncoding	ENST00000537555	RP11-551L14.6	GENCODE	348	chr12	+	31165436	31168601		TCTCTTCTATCCTGTCAGATAACCAAGGCACGGCCAACTGATCCTCCACCATCCGAGGAA		intergenic							1244.73	94.0695	9.11163	6.12941
ASHGA5P021554	5.13407	5.13407	2.3601	up	noncoding	ENST00000534867	RP4-669L17.10	GENCODE	1170	chr1	+	324437	325896	ENST00000399073, ENST00000418377, ENST00000427071, ENST00000435244, ENST00000447412, ENST00000456623, ENST00000457006, ENST00000526704, ENST00000542435, ENST00000567913, NR_024368, NR_024497, NR_028322, NR_028324, NR_028326, NR_028327, NR_029401, NR_037596, NR_039983, uc001aam.4, uc001lnx.3, uc002khh.3, uc003icc.1	ACCTCACCAGGCCCAGCTCCTGCATCTTGGTGGCCCCTCCAGGCCCAGCCTCTGCCTCCC		intergenic							11718	1027.17	12.3286	9.96846
ASHGA5P025988	3.10654	3.10654	1.63531	up	noncoding	NR_047694	PIGT	RefSeq	2068	chr20	+	44044706	44054885		CGGGAAGGAGTGTGGATAAATCTTGGAAGGAGCTCAGTAATGTCCTCTCAGGGATCTTCT	51604	exon sense-overlapping	NM_001184728	PIGT	GPI transamidase component PIG-T isoform 2 precursor	+	44044706	44054885	18.3499	5	3.95656	2.32125
ASHGA5P025988	3.10654	3.10654	1.63531	up	noncoding	NR_047694	PIGT	RefSeq	2068	chr20	+	44044706	44054885		CGGGAAGGAGTGTGGATAAATCTTGGAAGGAGCTCAGTAATGTCCTCTCAGGGATCTTCT	51604	exon sense-overlapping	NM_001184729	PIGT	GPI transamidase component PIG-T isoform 3 precursor	+	44044706	44054885	18.3499	5	3.95656	2.32125
ASHGA5P025988	3.10654	3.10654	1.63531	up	noncoding	NR_047694	PIGT	RefSeq	2068	chr20	+	44044706	44054885		CGGGAAGGAGTGTGGATAAATCTTGGAAGGAGCTCAGTAATGTCCTCTCAGGGATCTTCT	51604	exon sense-overlapping	NM_001184730	PIGT	GPI transamidase component PIG-T isoform 4 precursor	+	44044706	44054885	18.3499	5	3.95656	2.32125
ASHGA5P025988	3.10654	3.10654	1.63531	up	noncoding	NR_047694	PIGT	RefSeq	2068	chr20	+	44044706	44054885		CGGGAAGGAGTGTGGATAAATCTTGGAAGGAGCTCAGTAATGTCCTCTCAGGGATCTTCT	51604	exon sense-overlapping	NM_015937	PIGT	GPI transamidase component PIG-T isoform 1 precursor	+	44044706	44054885	18.3499	5	3.95656	2.32125
ASHGA5P028281	69.1445	69.1445	6.11154	up	noncoding	ENST00000547021	RP11-686G8.2	GENCODE	485	chr12	+	112037301	112038060		TCACTTGAACTTCTTTTTCCTCATTCATGAGATTCTAAAGGAAATATATGGGATTGGGAC		natural antisense	NM_002973	ATXN2	ataxin-2	-	111890017	112037480	829.353	8.28451	8.65514	2.54359
ASHGA5P000205	467.998	467.998	8.87036	up	noncoding	chr10:7584675-7594825-	chr10:7584675-7594825	LincRNAs identified by Khalil et al	10150	chr10	-	7544669	7554819		TATTTCTTTCTTCCTTTCTGTGACAACGGACAAGTTGCCCTTATCCCTCTGAGGAAGCTG		intergenic							44663	79.4593	14.7367	5.86632
ASHGA5P030481	4.38425	4.38425	2.13233	up	noncoding	ENST00000501665	OIP5-AS1	GENCODE	1350	chr15	+	41576229	41601901		CTGCATTTCCCCTCCATTCTTGAAGCCAATCTTTTTCAAGAAATGACTAAGCAGCACCTG	729082	natural antisense	NM_007280	OIP5	protein Mis18-beta	-	41601465	41624819	1307.86	165.99	9.18384	7.05151
ASHGA5P028184	9.90901	9.90901	3.30874	up	noncoding	ENST00000552534	RP11-121G22.3	GENCODE	924	chr12	+	81672963	81706152	ENST00000550302, ENST00000551401	ATTTTGTATTTCATCATGACACACATACTCACTGCGTCGAAAAGCATAGTCAGGCTGAGG		intronic antisense	NM_001220473	PPFIA2	liprin-alpha-2 isoform b	-	81652044	82152474	5541.5	274.689	11.1651	7.85639
ASHGA5P028184	9.90901	9.90901	3.30874	up	noncoding	ENST00000552534	RP11-121G22.3	GENCODE	924	chr12	+	81672963	81706152	ENST00000550302, ENST00000551401	ATTTTGTATTTCATCATGACACACATACTCACTGCGTCGAAAAGCATAGTCAGGCTGAGG		intronic antisense	NM_001220474	PPFIA2	liprin-alpha-2 isoform c	-	81652044	82152474	5541.5	274.689	11.1651	7.85639
ASHGA5P028184	9.90901	9.90901	3.30874	up	noncoding	ENST00000552534	RP11-121G22.3	GENCODE	924	chr12	+	81672963	81706152	ENST00000550302, ENST00000551401	ATTTTGTATTTCATCATGACACACATACTCACTGCGTCGAAAAGCATAGTCAGGCTGAGG		intronic antisense	NM_001220475	PPFIA2	liprin-alpha-2 isoform d	-	81652044	82152286	5541.5	274.689	11.1651	7.85639
ASHGA5P028184	9.90901	9.90901	3.30874	up	noncoding	ENST00000552534	RP11-121G22.3	GENCODE	924	chr12	+	81672963	81706152	ENST00000550302, ENST00000551401	ATTTTGTATTTCATCATGACACACATACTCACTGCGTCGAAAAGCATAGTCAGGCTGAGG		intronic antisense	NM_001220476	PPFIA2	liprin-alpha-2 isoform e	-	81652044	82152286	5541.5	274.689	11.1651	7.85639
ASHGA5P028184	9.90901	9.90901	3.30874	up	noncoding	ENST00000552534	RP11-121G22.3	GENCODE	924	chr12	+	81672963	81706152	ENST00000550302, ENST00000551401	ATTTTGTATTTCATCATGACACACATACTCACTGCGTCGAAAAGCATAGTCAGGCTGAGG		intronic antisense	NM_001220477	PPFIA2	liprin-alpha-2 isoform f	-	81652044	81992150	5541.5	274.689	11.1651	7.85639
ASHGA5P028184	9.90901	9.90901	3.30874	up	noncoding	ENST00000552534	RP11-121G22.3	GENCODE	924	chr12	+	81672963	81706152	ENST00000550302, ENST00000551401	ATTTTGTATTTCATCATGACACACATACTCACTGCGTCGAAAAGCATAGTCAGGCTGAGG		intronic antisense	NM_001220478	PPFIA2	liprin-alpha-2 isoform g	-	81652044	81992150	5541.5	274.689	11.1651	7.85639
ASHGA5P028184	9.90901	9.90901	3.30874	up	noncoding	ENST00000552534	RP11-121G22.3	GENCODE	924	chr12	+	81672963	81706152	ENST00000550302, ENST00000551401	ATTTTGTATTTCATCATGACACACATACTCACTGCGTCGAAAAGCATAGTCAGGCTGAGG		intronic antisense	NM_001220479	PPFIA2	liprin-alpha-2 isoform h	-	81652044	81763193	5541.5	274.689	11.1651	7.85639
ASHGA5P028184	9.90901	9.90901	3.30874	up	noncoding	ENST00000552534	RP11-121G22.3	GENCODE	924	chr12	+	81672963	81706152	ENST00000550302, ENST00000551401	ATTTTGTATTTCATCATGACACACATACTCACTGCGTCGAAAAGCATAGTCAGGCTGAGG		intronic antisense	NM_001220480	PPFIA2	liprin-alpha-2 isoform i	-	81652044	81763193	5541.5	274.689	11.1651	7.85639
ASHGA5P028184	9.90901	9.90901	3.30874	up	noncoding	ENST00000552534	RP11-121G22.3	GENCODE	924	chr12	+	81672963	81706152	ENST00000550302, ENST00000551401	ATTTTGTATTTCATCATGACACACATACTCACTGCGTCGAAAAGCATAGTCAGGCTGAGG		intronic antisense	NM_003625	PPFIA2	liprin-alpha-2 isoform a	-	81652044	82153109	5541.5	274.689	11.1651	7.85639
ASHGA5P014698	25.5337	25.5337	4.67433	up	noncoding	ENST00000412606	AC096559.1	GENCODE	578	chr2	+	12454442	12701391		GAATCAACTATCTGAGCCTTCATCTACCACATAAGAATTGCAGCAAACCCTGCAGCTATC		intergenic							767.042	21.7077	8.55755	3.88322
ASHGA5P031896	12.3204	12.3204	3.62297	up	noncoding	ENST00000566738	RP11-432I5.8	GENCODE	777	chr16	+	71757082	71758133		AGGCTTGGAGGACTAGAGCGCAAGGAGGGGTATTTGCTGCTTTCCCCGCCCTCTAAGAAA		intronic antisense	ENST00000568954	PHLPP2	PH domain and leucine rich repeat protein phosphatase 2 [Source:HGNC Symbol;Acc:29149]	-	71678826	71758604	433.742	27.7087	7.86435	4.24138
ASHGA5P031896	12.3204	12.3204	3.62297	up	noncoding	ENST00000566738	RP11-432I5.8	GENCODE	777	chr16	+	71757082	71758133		AGGCTTGGAGGACTAGAGCGCAAGGAGGGGTATTTGCTGCTTTCCCCGCCCTCTAAGAAA		natural antisense	ENST00000567016	PHLPP2	PH domain and leucine rich repeat protein phosphatase 2 [Source:HGNC Symbol;Acc:29149]	-	71682072	71757785	433.742	27.7087	7.86435	4.24138
ASHGA5P034471	20.0878	20.0878	4.32825	up	noncoding	ENST00000431363	ZNF833P	pseudogene	1407	chr19	+	11759178	11763692		GTTGCTTTTCGTAGACATAAAATTACCCACACTGCAGAGAAACTTTGAGTGTAAGGAATG	401898								155.722	5	6.6495	2.32125
ASHGA5P058850	97.1932	97.1932	6.60278	up	noncoding	uc.468+	uc.468	UCR	489	chrX	+	25017562	25018051		AAAGGAGAAAGTGCAACCAGCCTTCAATTCACTCTTTCACCACTTTAACAGCACCAAAGG		intergenic							2131.58	13.7864	9.82405	3.22127
ASHGA5P023874	3.65098	3.65098	1.86828	up	noncoding	HMlincRNA807+	HMlincRNA807	LincRNAs identified by Khalil et al	5742	chr18	+	68717578	68723320		CTCTTGGCTAGACTTTACATGATAGCTTATTTTGCCCTTTCCCTCTTGTAAAGATGATTC		intergenic							579.814	108.647	8.23625	6.36796
ASHGA5P000197	164.699	164.699	7.36368	up	noncoding	chr10:43321675-43337750-	chr10:43321675-43337750	LincRNAs identified by Khalil et al	16075	chr10	-	44001669	44017744		CTCTTCCACTCATCAACACCAAATTACAATTTCAGACAGCAATAATTTTCCATGTGCAAA		intergenic							17901.5	71.5951	13.0682	5.70455
ASHGA5P039869	103.271	103.271	6.69029	up	noncoding	TCONS_00022832	XLOC_011103	LincRNAs identified by Cabili et al	294	chr14	-	90982162	90983553		GCTAACAGCTGGAGAACATCCCTGCCCGTGTCTCAGCGCAAATACACACCAATAAATCCA		intergenic							10983.2	64.3299	12.2211	5.5308
ASHGA5P056539	4.09357	4.09357	2.03336	up	noncoding	TCONS_00005992	XLOC_002617	LincRNAs identified by Cabili et al	1569	chr3	+	39246725	39252892		AGATGAGCTGTTCCTGATTGTCTAACTTCTTTTGTTAGATCTTGCCTGGAGACATCAAAC		intergenic							24.8739	5	4.35461	2.32125
ASHGA5P058287	4.19689	4.19689	2.06932	up	noncoding	TCONS_00029275	XLOC_014057	LincRNAs identified by Cabili et al	290	chr21	-	34402768	34407541		TAATCCTCACAGCAGCACAGTTGTCAGACACCAAGCACACTCAGAGCCTGCACCAGTACA		intergenic							150.882	33.8847	6.60999	4.54067
ASHGA5P041745	2.96975	2.96975	1.57034	up	noncoding	ENST00000431012	ZNRD1-AS1	GENCODE	3294	chr6	-	30022377	30028956		TGTTTCAGGAACTCAGTTTGTCCAAACCTGCATCCATCATCTACCTCAAATTATATCCAC	80862	bidirectional	NM_014596	ZNRD1	DNA-directed RNA polymerase I subunit RPA12	+	30029035	30032686	42575.9	8150.03	14.6313	13.0609
[truncated: 1,683 more rows]

## Sheet: down_ZZ_Day2_vs_ZZ_Day0
# Fold Change cut-off: 2.0 # Condition pairs: ZZ_Day2_vs_ZZ_Day0 # Column A: ProbeName it represents probe name. # Column B: Fold change, positive value indicates up-regulation and negative value indicates down-regulation. # Column C: FC (abs), Absolute Fold change between two samples. # Column D: Log Fold change, log2 value of absolute fold change. Positive value indicates up-regulation and nega…
[truncated: 4,429 more rows]

[truncated: 2 more sheets: up_ZZ_AAT_vs_ZZ_Ctrl, down_ZZ_AAT_vs_ZZ_Ctrl]
