# Supplementary material for: Long Non-Coding RNA Expression in Alpha-1 Antitrypsin Deficient Monocytes Pre- and Post-AAT Augmentation Therapy
Source: Noncoding RNA. 2023 Jan 10;9(1):6. doi: 10.3390/ncrna9010006 (PMC9844503; doi:10.3390/ncrna9010006)
Supplement: Supplementary file 1 [file ncrna-09-00006-s001.zip › ncrna-1983663-supplementary/ncrna-1983663-Table S1-S2.xlsx]

## Sheet: Table S1 Common Up
616 common elements upregulated +FC2.0 in "Day 2 vs. Day 0" and "ZZ_AAT vs. ZZ_Ctrl" samples.
ENST00000569328
uc021rtn.1
TCONS_00023825
ENST00000561980
TCONS_00014912
NR_026929
TCONS_00017652
DA802942
TCONS_00028204
TCONS_00029699
ENST00000427974
HMlincRNA1594+
TCONS_00005041
TCONS_00018319
ENST00000422826
ENST00000473164
TCONS_00000801
ENST00000457302
ENST00000436715
ENST00000561054
TCONS_00005360
ENST00000416902
uc.268+
TCONS_00016354
ENST00000545958
TCONS_00022439
ENST00000550324
uc021xph.1
TCONS_00028561
ENST00000542586
TCONS_00026676
ENST00000458633
BF986711
NR_037715
TCONS_00018246
uc002ydh.3
ENST00000529135
ENST00000531077
ENST00000421965
TCONS_00027248
ENST00000518134
ENST00000483544
TCONS_00014987
ENST00000445429
ENST00000532605
ENST00000439472
ENST00000517726
ENST00000506718
TCONS_00006440
ENST00000571780
uc002how.1
ENST00000467677
ENST00000547452
ENST00000541949
uc002ydg.1
ENST00000576266
DB338868
ENST00000574864
TCONS_00024405
ENST00000548475
ENST00000518355
ENST00000503710
ENST00000447412
ENST00000416924
ENST00000488999
ENST00000493812
ENST00000581240
TCONS_00020843
ENST00000577218
uc021taz.1
ENST00000546563
TCONS_00014986
ENST00000549930
TCONS_00006552
ENST00000567913
ENST00000578003
TCONS_00013350
ENST00000554838
BU663707
NR_045638
ENST00000456090
TCONS_00022980
ENST00000542689
ENST00000545609
ENST00000493696
TCONS_00022028
ENST00000544386
ENST00000444093
NR_033979
NR_026966
TCONS_00011248
ENST00000458107
ENST00000452971
uc003emd.1
TCONS_00023378
uc003wrb.1
TCONS_00003583
ENST00000502645
TCONS_00004443
ENST00000579201
ENST00000581648
ENST00000428504
ENST00000424716
ENST00000483023
ENST00000326734
ENST00000518213
uc.470-
ENST00000515341
TCONS_00010462
uc004cos.4
ENST00000542489
ENST00000548268
ENST00000503386
NR_046539
uc011btt.2
ENST00000512090
ENST00000568619
NR_024090
uc.355+
ENST00000558370
ENST00000509780
ENST00000431145
ENST00000559825
TCONS_00009150
ENST00000433217
NR_038388
ENST00000467995
uc001wpo.1
ENST00000565310
TCONS_00008111
ENST00000518593
ENST00000575562
TCONS_00022047
uc021pwt.1
HMlincRNA1607+
ENST00000420143
TCONS_00023594
TCONS_00001220
HMlincRNA1546+
ENST00000545308
ENST00000572287
uc002ecm.4
uc010gsl.3
ENST00000508469
TCONS_00018115
ENST00000579467
ENST00000464823
ENST00000425157
ENST00000422548
ENST00000520457
NR_033370
ENST00000558398
HMlincRNA1314+
TCONS_00015920
uc003lrn.1
ENST00000434839
ENST00000507653
ENST00000426882
ENST00000420427
ENST00000503452
ENST00000450920
ENST00000425370
TCONS_00001801
TCONS_00006033
ENST00000570443
NR_038133
TCONS_00008983
ENST00000512634
ENST00000432537
ENST00000541940
BF869766
ENST00000442868
TCONS_00008390
ENST00000429443
CN281635
uc002fxw.1
TCONS_00013856
ENST00000567077
ENST00000584714
AF070625
ENST00000435322
ENST00000432108
ENST00000432032
TCONS_00008982
NR_029409
ENST00000509713
ENST00000549058
ENST00000431244
uc010kwx.1
ENST00000510145
ENST00000449730
ENST00000369391
ENST00000440614
NR_045670
chr1:54700800-54732968+
TCONS_00003325
ENST00000428649
NR_046113
TCONS_00014981
ENST00000527080
ENST00000425189
NR_026945
HMlincRNA907+
TCONS_00022115
ENST00000429809
TCONS_00019646
ENST00000454735
NR_028494
ENST00000550905
ENST00000445003
NR_040094
NR_036537
ENST00000442726
uc010cul.1
TCONS_00027943
ENST00000439246
ENST00000453128
ENST00000515466
ENST00000551284
EB386294
TCONS_00023984
ENST00000508065
uc009wkz.1
uc003jyk.3
ENST00000537401
ENST00000425517
ENST00000584898
TCONS_00013774
TCONS_00006336
uc001zfu.3
ENST00000563852
ENST00000420285
ENST00000417968
ENST00000581291
TCONS_00021972
chr8:58900375-58914400+
ENST00000554852
ENST00000551844
ENST00000448958
ENST00000416229
NR_024408
TCONS_00006207
ENST00000436121
ENST00000436765
ENST00000580996
ENST00000569858
NR_038452
ENST00000418950
ENST00000523789
uc003prp.3
ENST00000448988
TCONS_00020575
ENST00000430529
ENST00000437047
AK054953
ENST00000568836
ENST00000512284
ENST00000579378
ENST00000534593
ENST00000539685
ENST00000452073
NR_026985
ENST00000521793
ENST00000521904
TCONS_00008846
ENST00000447478
ENST00000423171
NR_045663
TCONS_00028307
HMlincRNA1179-
NR_037717
ENST00000415147
TCONS_00026279
NR_026723
AV660546
TCONS_00023350
ENST00000439606
TCONS_00013287
HMlincRNA1106+
chrX:20329325-20341425+
ENST00000570515
NR_051967
TCONS_00014648
uc.92+
TCONS_00024207
ENST00000438967
ENST00000478824
ENST00000524441
ENST00000565936
TCONS_00005098
ENST00000506028
ENST00000440213
ENST00000558101
NR_038225
ENST00000456582
ENST00000560727
uc003feg.3
ENST00000456450
ENST00000537555
chr10:7584675-7594825-
ENST00000501665
chr10:43321675-43337750-
TCONS_00029275
TCONS_00021980
ENST00000416470
ENST00000454877
chr14:93405000-93415700-
uc010tyx.1
TCONS_00010156
ENST00000422230
ENST00000388789
ENST00000506005
ENST00000560865
H68436
TCONS_00008451
ENST00000554529
uc.121+
TCONS_00007197
TCONS_00014998
ENST00000567405
NR_026722
ENST00000419668
ENST00000547946
TCONS_00000953
ENST00000414300
TCONS_00017372
AK021960
ENST00000574028
ENST00000450998
uc003fgn.1
TCONS_00011779
ENST00000546791
ENST00000514993
ENST00000524042
TCONS_00001709
TCONS_00007773
ENST00000584277
uc021qbz.1
TCONS_00021084
ENST00000529837
TCONS_00018380
ENST00000509885
chr1:4325150-4335375-
NR_040043
NR_045511
ENST00000561719
NR_028495
uc.340+
ENST00000509568
ENST00000553177
ENST00000425271
uc.38-
uc001miu.3
ENST00000547492
NR_034167
ENST00000436283
BM728564
ENST00000502467
ENST00000537616
TCONS_00001590
ENST00000427859
NR_024564
ENST00000527543
NR_038979
ENST00000580057
uc010bmm.3
ENST00000421866
ENST00000439438
ENST00000521256
ENST00000452883
TCONS_00007086
ENST00000523413
TCONS_00007459
ENST00000434117
ENST00000513466
ENST00000423819
ENST00000569618
ENST00000457870
TCONS_00029694
NR_027774
HMlincRNA773-
ENST00000453878
ENST00000444374
ENST00000522857
TCONS_00027618
ENST00000534287
ENST00000523422
NR_028351
ENST00000562838
ENST00000525328
ENST00000416908
ENST00000420350
TCONS_00003672
ENST00000431293
TCONS_00029617
ENST00000439788
ENST00000437261
uc010upk.1
ENST00000572634
ENST00000379050
ENST00000539963
TCONS_00010169
ENST00000449235
uc022cjh.1
ENST00000413352
ENST00000450850
uc003zhu.3
ENST00000413494
NR_033941
ENST00000437730
TCONS_00017630
HMlincRNA1253-
uc002jok.3
TCONS_00023466
TCONS_00022431
NR_038402
ENST00000485218
uc004ebm.1
ENST00000567043
TCONS_00004291
NR_002813
ENST00000558835
ENST00000443892
ENST00000399003
uc003che.3
ENST00000418255
TCONS_00012265
ENST00000415054
NR_037807
ENST00000412593
TCONS_00012819
uc002aqh.1
NR_015369
ENST00000445072
TCONS_00027297
ENST00000457804
ENST00000562772
uc003myx.3
ENST00000562656
ENST00000448686
ENST00000541353
TCONS_00000802
ENST00000442226
ENST00000561876
NR_027700
ENST00000427911
uc003skf.1
NR_024453
ENST00000418204
NR_049725
ENST00000580639
uc003jvn.1
NR_023361
ENST00000446220
uc001kjn.4
TCONS_00022739
ENST00000546798
TCONS_00026600
HMlincRNA939-
ENST00000512096
ENST00000413347
HMlincRNA629+
ENST00000500113
ENST00000442606
NR_046510
ENST00000560651
TCONS_00001483
TCONS_00015980
ENST00000567981
ENST00000443800
ENST00000528792
TCONS_00011799
AL038759
ENST00000571869
ENST00000577746
TCONS_00029727
ENST00000552905
ENST00000445300
ENST00000417447
ENST00000563540
ENST00000444359
ENST00000435843
ENST00000451101
ENST00000552063
ENST00000555383
ENST00000453478
ENST00000421937
uc001ozj.3
TCONS_00001956
ENST00000563019
ENST00000456384
ENST00000555853
ENST00000443282
TCONS_00026386
TCONS_00012771
uc001zgr.1
ENST00000420187
ENST00000447775
uc010yih.1
NR_040037
TCONS_00007965
ENST00000411512
ENST00000443364
uc010khg.1
ENST00000505748
NR_045122
ENST00000511042
ENST00000504620
TCONS_00019666
ENST00000571370
ENST00000517356
ENST00000469196
NR_038924
ENST00000552554
TCONS_00005270
TCONS_00016340
uc009vpu.2
ENST00000513082
TCONS_00017163
ENST00000530972
ENST00000555291
ENST00000577879
TCONS_00021769
TCONS_00027491
uc001ebz.3
TCONS_00012071
ENST00000412378
BE675158
ENST00000537295
ENST00000540136
ENST00000442483
CV329709R
ENST00000434938
ENST00000440379
ENST00000495939
ENST00000551849
ENST00000548170
NR_046636
ENST00000546429
uc004azi.1
uc021sqp.1
chr11:8171725-8184025+
TCONS_00006165
ENST00000421322
NR_027148
TCONS_00023478
NR_024059
chr14:58685825-58705500+
ENST00000577173
NR_034120
ENST00000563553
TCONS_00029778
ENST00000508534
ENST00000411450
TCONS_00006208
ENST00000439014
ENST00000454977
TCONS_00021409
ENST00000409819
uc001zqm.3
AA128631
TCONS_00016472
uc011dhd.2
ENST00000570809
TCONS_00028573
TCONS_00006087
ENST00000533814
TCONS_00006387
ENST00000412276
NR_045622
TCONS_00027356
ENST00000504817
ENST00000418264
uc002tfi.3
BX101441
uc001lva.4
NR_038829
ENST00000504207
ENST00000579050
ENST00000550301
ENST00000577227
chr13:25892925-25912325-
ENST00000522087
ENST00000565934
TCONS_00008385
NR_027035
TCONS_00017353
TCONS_00027735
TCONS_00012240
TCONS_00001225
ENST00000545704
TCONS_00027620
ENST00000435444
ENST00000570512
ENST00000427474
ENST00000571152
ENST00000512050
TCONS_00028117
TCONS_00008217
TCONS_00010003
ENST00000569267
uc021vdl.1
ENST00000551279
ENST00000447148
ENST00000491870
ENST00000559672
ENST00000417922
NR_038434
NR_024237
ENST00000536131
ENST00000433431
ENST00000522896
ENST00000435643
ENST00000569147
NR_033861
ENST00000432993

## Sheet: Table S2 Common down
311 common elements downregulated +FC2.0 in "Day 2 vs. Day 0" and "ZZ_AAT vs. ZZ_Ctrl" samples
uc011dng.1
ENST00000554412
TCONS_00018421
NR_029401
uc001wuo.3
TCONS_00022844
TCONS_00028969
ENST00000512939
ENST00000450203
uc002dsg.4
TCONS_00027313
ENST00000441861
ENST00000507486
NR_027167
ENST00000477848
ENST00000562262
TCONS_00011944
chr7:149967450-150001750-
uc022bdg.1
ENST00000422931
TCONS_00029153
TCONS_00029500
AA593324
TCONS_00008000
TCONS_00017230
chr4:109840575-109856475+
ENST00000427373
ENST00000577863
TCONS_00014225
ENST00000325660
chr13:57331500-57346525+
NR_024586
TCONS_00004741
ENST00000564705
ENST00000563182
ENST00000509700
ENST00000441360
ENST00000502934
TCONS_00005052
ENST00000519801
TCONS_00013984
TCONS_00024463
ENST00000449419
ENST00000419128
uc002ksd.1
TCONS_00013857
ENST00000506057
ENST00000348899
uc001mke.3
ENST00000548756
uc.201+
ENST00000421297
TCONS_00025565
ENST00000450353
ENST00000507983
TCONS_00001430
TCONS_00015067
ENST00000432987
ENST00000441289
ENST00000583442
ENST00000575487
ENST00000559786
chr2:122289675-122301200+
NR_038915
ENST00000519063
ENST00000550498
ENST00000520944
ENST00000553825
TCONS_00022685
ENST00000569326
TCONS_00008047
ENST00000429250
NR_038273
NR_015436
uc001nnk.1
uc002zlq.4
NR_033710
ENST00000511310
ENST00000419100
HMlincRNA1172-
ENST00000458662
ENST00000511927
ENST00000420480
NR_003255
ENST00000472376
TCONS_00023865
ENST00000558251
NR_024582
TCONS_00028127
TCONS_00026338
ENST00000504546
ENST00000458036
ENST00000563751
ENST00000524198
TCONS_00001219
uc.247+
ENST00000565305
ENST00000537780
ENST00000531701
uc002boc.3
ENST00000581134
ENST00000428300
ENST00000526458
chr8:66380600-66391625+
TCONS_00026643
ENST00000569586
ENST00000449673
HMlincRNA1602+
TCONS_00006248
TCONS_00021993
ENST00000522571
chr9:115624525-115638900-
ENST00000576336
TCONS_00026989
ENST00000566101
NR_048561
NR_033913
ENST00000453229
ENST00000582689
ENST00000458252
TCONS_00003680
ENST00000579506
TCONS_00008353
ENST00000508328
ENST00000432559
ENST00000422649
uc001fts.4
ENST00000569373
BX093893
NR_034160
ENST00000568021
uc010sgj.1
uc002kes.3
NR_024444
uc001vvi.3
uc003uui.2
ENST00000552364
TCONS_00002818
ENST00000541282
uc011hzu.2
TCONS_00014926
ENST00000438147
TCONS_00004897
ENST00000446720
BU662692
ENST00000454361
ENST00000571772
TCONS_00008569
NR_024460
ENST00000511712
ENST00000570024
TCONS_00006619
NR_033837
TCONS_00019244
chr4:4855350-4865400-
chr14:93405000-93415700+
TCONS_00014872
ENST00000561511
uc003xxw.1
chr4:60023500-60045050+
uc010ngy.1
TCONS_00001500
uc002lgd.1
ENST00000449106
ENST00000567853
ENST00000502027
NR_038422
uc022coe.1
ENST00000569807
ENST00000535301
ENST00000417692
NR_038339
ENST00000435156
ENST00000441245
ENST00000569013
TCONS_00011882
TCONS_00018867
ENST00000558208
ENST00000513771
ENST00000504882
TCONS_00013731
ENST00000578423
ENST00000565098
NR_027284
ENST00000561900
ENST00000432743
ENST00000443870
ENST00000523614
ENST00000568091
ENST00000562691
TCONS_00021722
ENST00000531304
NR_024199
ENST00000548368
NR_048543
ENST00000436252
ENST00000415252
TCONS_00016872
ENST00000527789
ENST00000555156
ENST00000424029
TCONS_00010352
ENST00000442040
ENST00000427317
uc001aai.1
ENST00000423551
uc003tez.3
TCONS_00003872
ENST00000521251
ENST00000443636
ENST00000432473
ENST00000454260
ENST00000441075
TCONS_00014937
ENST00000531402
ENST00000552290
ENST00000560368
ENST00000558345
ENST00000444046
TCONS_00028115
ENST00000545535
ENST00000583643
ENST00000454387
ENST00000551421
NR_040011
TCONS_00003675
uc002xzq.1
ENST00000455572
ENST00000562782
ENST00000536866
ENST00000585184
ENST00000430356
ENST00000447308
ENST00000583460
ENST00000542880
TCONS_00016890
ENST00000556620
ENST00000414442
ENST00000573127
ENST00000420389
ENST00000448636
ENST00000437772
uc001gxt.3
ENST00000414596
NR_040513
ENST00000428035
ENST00000570288
ENST00000552098
uc001jek.2
ENST00000555460
AW076083
NR_038303
uc001agf.1
HMlincRNA1574+
uc001ajo.2
ENST00000422957
ENST00000566476
ENST00000412809
DB123109
chr1:56367475-56378825-
TCONS_00024360
ENST00000546324
ENST00000417510
ENST00000575647
ENST00000555250
uc022aik.1
TCONS_00018359
ENST00000558343
ENST00000447860
chr8:29955875-29977325-
ENST00000421310
ENST00000435028
ENST00000447577
TCONS_00007953
uc004bdv.3
uc002jet.1
ENST00000452103
ENST00000575838
TCONS_00008904
ENST00000451180
uc010gsf.1
TCONS_00012778
DA298649
ENST00000423402
ENST00000465283
ENST00000528646
ENST00000434176
ENST00000420452
TCONS_00016666
ENST00000419973
ENST00000469070
uc001ogq.1
TCONS_00025773
ENST00000542925
ENST00000553729
TCONS_00014789
ENST00000466740
ENST00000415686
AK123317R
DR159293
ENST00000457834
NR_045684
ENST00000583946
uc003syl.3
ENST00000444038
ENST00000439577
ENST00000451510
HMlincRNA1593+
TCONS_00004502
DW409420R
uc021rel.1
